# Supplementary material for: Effective mass and Fermi surface complexity factor from ab initio band structure calculations
Source: Springer Nature journal article supplement (doi:10.1038/s41524-017-0013-3), 2017-02-17
Supplement: MOESM1 [file 41524_2017_13_MOESM1_ESM.docx]

Supplementary Material for:

Effective mass and Fermi Surface Complexity Factor from *Ab-Initio* Band Structure Calculations

Zachary M. Gibbs, Francesco Ricci, Guodong Li, Hong Zhu, Kristin Persson, Gerbrand Ceder, Geoffroy Hautier, Anubhav Jain, G. Jeffrey Snyder

Upon calculating the Fermi surface complexity factor for other III-V compounds, we can see many analogs to the AlAs results. AlP (Figure S1a) shows a primary extrema at *X-c* (*Nv*=3), which ) matches well; this is followed by the *K-c* (*Nv*=12, at 0.83 eV above *X-c*) and *X2-c* (*Nv*=3, at 0.85 eV above *X-c*) bands which result in a small increase in () up to >10.0 (although not until ~1.2 eV above *X-c* edge, which is not plotted). The conduction band of AlSb in Figure S1b shows three near-converged bands with the primary *L-c* band (*Nv*=4) accompanied by a (*Nv*=6 at 0.03 eV above *L-c*) and (*Nv*=1 at 0.05 eV above *L-c*). Because these two bands are so close in energy (within 2 *kBT* at 300 K) to the conduction band edge, it is not surprising that () more closely reflects the sum of the degeneracy for these bands; even within the band gap, . This value is slightly larger than the expected *Nv* of 11, but it is possible that the nearby *X-c* band with *Nv*=3 could also be contributing as well. The conduction bands of GaN and GaSb are a bit simpler in that their primary conduction band lays at —resulting in both yielding , as expected. In the case of GaAs, a secondary band at *L-c* (*Nv*=4, at 0.69 eV above ) results in an abrupt jump in the Fermi surface complexity factor up to about 7.0 around this energy. The details of each of the n-type III-V compounds’ effective masses, expected valley degeneracy, and Fermi surface complexity factors are included in Table S1. The valence bands of all of the III-V compounds in this work showed the same triply degenerate at the behavior as in AlAs (Figure 2c), some were followed by a doubly degenerate at *L12-v*; however, the *L12-v* extrema were usually much lower in energy and did not effect much. In all cases, was between 6 and 10 at the valence band edge () which is greater than the expected *Nv* of 3.0, which should be attributed to the effective anisotropy factor (*K**) as mentioned previously for AlAs.


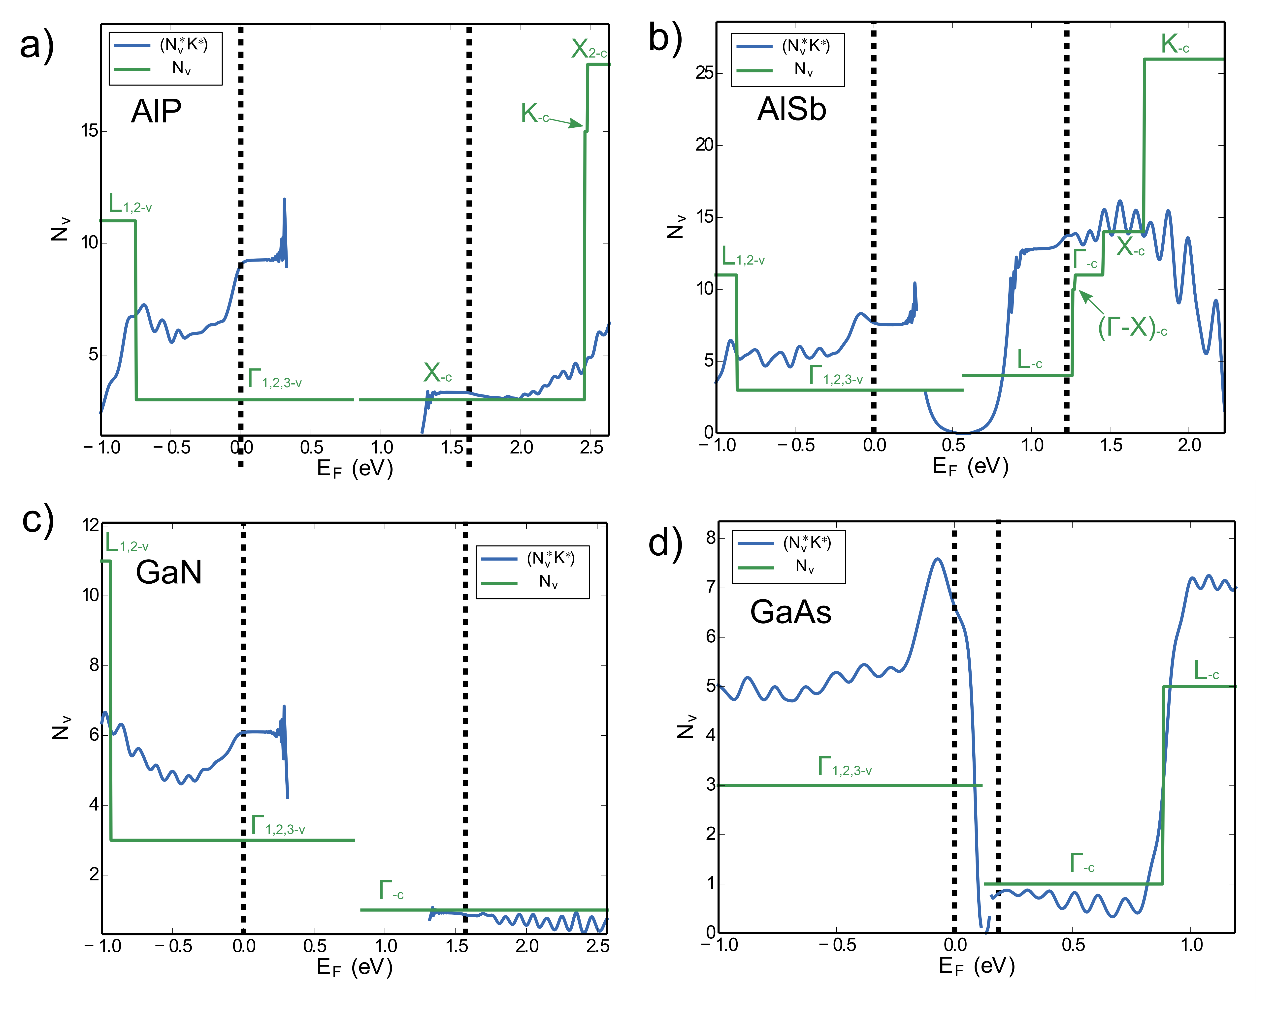


Figure S: Fermi surface complexity factor computed for several III-V compounds along with their expected valley degeneracies for A) AlP (mp-1550), B) AlSb (mp-2624), C) GaN (mp-830, Zinc Blende structure), and D) GaAs (mp-2534).

Table S: III-V semiconductor results regarding their true valley degeneracy extracted from band structure (CBM Loc, CB Deg), and their conductivity/Seebeck effective masses and Fermi surface complexity factors computed at the energy of the contributing band. Eg (band gap) is in eV, and MPID corresponds to the mp-id parameter used to store data within the Materials Project (materialsproject.org).

|  | **MPID** | ***Eg*** | ***CBM Loc*** | ***CB Deg*** | ***m S **** | ***mc**** | ***Nv*K**** |
| --- | --- | --- | --- | --- | --- | --- | --- |
| AlN | 1700 | 3.31 | X, (0.69) | 3, 1 | 0.81, 0.96 | 0.39, 0.47 | 3.0, 3.0 |
| AlP | 1550 | 1.63 | X, K (0.83), X (0.85) | 3, 12, 3 | 0.77, 1.39, 1.46 | 0.35, 0.51, 0.51 | 3.3, 4.5, 4.9 |
| AlAs | 2172 | 1.5 | X, (0.28), L (0.51), K (0.75), X (0.78) | 3, 1, 4, 12, 3 | 0.81, 0.97, 1.49, 1.94, 2.00 | 0.35, 0.42, 0.45, 0.42, 0.42 | 3.6, 3.5, 6.1, 9.8, 10.2 |
| AlSb | 2624 | 1.23 | L, -X (0.03), (0.05), X (0.23), K (0.49) | 4, 6, 1, 3, 12 | 1.37, 1.49, 1.53, 2.01, 2.05 | 0.24, 0.26, 0.27, 0.32, 0.36 | 13.7, 13.8, 13.9, 15.5, 13.7 |
| GaN | 830 | 1.57 |  | 1 | 0.15 | 0.16 | 0.9 |
| GaP | 2490 | 1.59 | L, (0.00), -X (0.05), X (0.26), K (0.63) | 4, 1, 6, 3, 12 | 1.23, 1.23, 1.40, 1.93, 2.08 | 0.22, 0.22, 0.24, 0.33, 0.39 | 13.0, 13.0, 14.1, 14.2, 12.3 |
| GaAs | 2534 | 0.19 | , L (0.69) | 1, 4 | 0.03, 0.25 | 0.04, 0.12 | 0.8, 3.1 |
| GaSb | 1156 | 0 | , L (0.32), -X (0.93) | 1, 4, 6 | 0.02, 0.24, 0.89 | 0.03, 0.09, 0.22 | 0.5, 4.7, 8.4 |
| InN | 20411 | 0 |  | 1 | 0.09 | 0.12 | 0.66 |
| InP | 20351 | 0.47 | , L (0.93) | 1, 4 | 0.055, 0.47 | 0.06, 0.27 | 0.84, 2.6 |
| InAs | 20305 | 0 | , L (0.84) | 1, 4 | 0.03, 0.43 | 0.05, 0.24 | 0.6, 2.4 |
| InSb | 20012 | 0 | , L (0.44) | 1, 4 | 0.03, 0.31 | 0.05, 0.13 | 0.5, 3.5 |

Specifically considering the III-V materials, we have assumed that each is crystallized in the zinc-blende crystal structure (Space group 216)—even though the nitrides are more stable in the hexagonal Wurtzite structure [14](#_ENREF_14),[43](#_ENREF_43). We also should point out that standard DFT calculations do not always provide the correct ordering of the conduction band minima (at the L, X, , and K points) [14](#_ENREF_14),[44](#_ENREF_44),[45](#_ENREF_45), but for simplicity and to illustrate the effectiveness of the Fermi surface complexity factor, we have assumed that these are the correct band structures and have interpreted all of the results with that assumption in mind (Wang et al. suggest the use of the modified Becke-Johnson semilocal exchange for values that more accurately represent experimental values [45](#_ENREF_45),[46](#_ENREF_46)). Further, while the valence band structure is similar among all of the III-V materials (triply degenerate at the point in the absence of spin-orbit coupling), we realize that if we had included spin-orbit coupling that one of the bands (the one with the intermediate effective mass) would split off from the other two (with the energy offset increasing with the mass of the elements).

Table S2 summarizes the computed Fermi surface complexity factor for the relevant IV-VI materials.

Table S: Valence band parameters for several IV-VI materials of thermoelectric interest. Band gaps (Eg) is listed in eV. VBM locations are given by their position in k-space as well as their energy offset relative to the valence band edge. We have included their degeneracy (individual band degeneracy, not cumulative which is plotted in the main text) , the Seebeck/conductivity effective mass (, ), and the calculated effective valley degeneracy, at each corresponding band edge energy. For SnTe, which had a very low band gap—values for the L band were taken 0.1 eV below the band edge so as to avoid strong bipolar effects.

|  | **MPID** | **Eg** | **VBM Loc** | **VBM Nv** | **m*Seeb** | **m*c** | **Nv*K*** |
| --- | --- | --- | --- | --- | --- | --- | --- |
| PbTe | 19717 | 0.81 | L, Σ (0.12), -X (0.30), W (0.30), Σ2 (0.64), L2,3 (0.76) | 4, 12, 6, 6, 12, 4x2 | 0.71, 2.29, 4.82, 1.37, 1.78 | 0.17, 0.23, 0.33, 0.41, 0.45 | 8.7, 30.8, 56.9, 6.0, 7.9 |
| PbSe | 20667 | 0.43 | L, Σ (0.34), W (0.68), -X (0.72) | 4, 12, 6, 6 | 0.37, 1.49, 2.87, 5.22 | 0.16, 0.30, 0.47, 0.49 | 3.5, 11.1, 14.9, 34.6 |
| PbS | 21276 | 0.46 | L, Σ (0.48), W (0.94), -X (1.00) | 4, 12, 6, 6 | 0.48, 2.19, 4.13, 2.69 | 0.20, 0.38, 0.63, 0.62 | 3.8, 14.0, 16.9, 9.0 |
| SnTe | 1883 | 0.04 | L, Σ (0.36), -X (0.80), W (0.82) | 4, 12, 6, 6 | 0.16, 1.13, 2.58, 3.16 | 0.07, 0.15, 0.32, 0.32 | 3.6, 21.7, 22.4, 30.7 |

When considering the IV-VI materials—all materials are calculated in their most stable configuration (unit cells relaxed in the rock salt—space group 225—structure). In PbTe in particular, the calculated band gap from GGA is much larger than the experimental band gap (~0.3 eV at 300K for PbTe [31](#_ENREF_31)). Literature suggests that if spin-orbit coupling (SOC) was considered, the gap shrinks to near the experimental values [42](#_ENREF_42), however we have neglected SOC contributions in this work. Regardless, because Boltztrap calculations are done at T=300 K, the band gap itself should not greatly affect the results; the results would be affected most for Fermi levels within the band gap, which is not where the interesting valley degeneracy effects occur. The effect is also present in PbSe and PbS, although to a lesser extent.

A list of isotropic materials sorted by Fermi surface complexity factor at 600K under various conditions is included in the supplemental spreadsheet.
