# Supplementary material for: Effective mass and Fermi surface complexity factor from ab initio band structure calculations
Source: Springer Nature journal article supplement (doi:10.1038/s41524-017-0013-3), 2017-02-17
Supplement: MOESM2 [file 41524_2017_13_MOESM2_ESM.xlsx]

## Sheet: n-FinalTable
P-type Isotropic
Materials Project Boltztrap List
Example Filters: 0.05 <band gap, maxPF_n < 1E21 (as applied in Figure 3)
Description of Data: Name, MPID (from Website), task_id (from boltztrap database)
Parameters: m*Seeb (Seebeck effective mass), m*c (conductivity mass), n (carrier concentration)
Data Presented in 3 modes
1) values calculated at constant 1x10^20 cm-3 carrier concentration
2) values calculated at the carrier concentration that gives the maximum Power Factor (PF)
3) values calculated at the carrier concentration that gives the maximum zT
Data generated assuming tau = 1E-14 s, kappaL = 0.5 W/m-K, At T=600 K
mpid	name	Eg (eV)	m*Seeb (1E20 cm-3)	m*c (1E20 cm-3)	Nv*K* (1E20)	max PF (units)	n (cm-3) (max PF)	m*seeb (max PF)	m*cond (max PF)	Nv*K* (max PF)	Max zT	n (cm-3) (max zT)	m*Seeb (max zT)	m*cond (max zT)	Nv*K* (max zT)
mp-2612	GeTe	0.414497	2.3867	0.155181	60.3168	44.1215	2.63165e+21	3.43733	0.16877	91.9156	3.39587	-4.59619e+19	2.24114	0.153394	55.8462
mp-631316	Li2GaSb	0.108995	2.21277	0.149312	57.0506	43.8796	1.72031e+21	3.26582	0.161406	91.0142	2.32062	-1.80693e+20	2.595	0.154475	68.8523
mp-2103	CuAu3	0	0.0538021	0.00269171	89.3629	2.37874	9.73372e+19	0.0532803	0.0026516	90.0716	0.00940503	2.80428e+20	0.108346	0.00772321	52.5439
mp-21162	SrPb3	0	0.24322	0.00928893	133.983	18.152	8.13863e+20	0.988186	0.0555789	74.971	0.185877	-7.46371e+20	0.943759	0.052269	76.7229
mp-1883	SnTe	0.0428035	1.23113	0.210151	14.1793	36.8913	3.18136e+21	3.4539	0.198297	72.6923	1.12511	-1.48303e+20	1.46036	0.216393	17.5319
mp-10759	GeSe	0.0583004	0.994313	0.231586	8.89645	30.2216	5.49738e+21	3.58577	0.232032	60.7506	1.03827	-9.11732e+19	0.966561	0.230139	8.60715
mp-2751	YbSn3	0	0.039987	0.00634458	15.8225	13.0674	2.08043e+21	1.21228	0.0881607	50.9909	0.0806125	-1.92376e+21	1.16786	0.0842569	51.6034
mp-11290	CaSn3	0	0.0376148	0.00687444	12.7992	13.225	2.59168e+21	1.41628	0.110445	45.9202	0.0834801	-2.33618e+21	1.34736	0.104613	46.2217
mp-19717	TePb	0.867404	0.739155	0.24229	5.32845	25.1721	4.32339e+21	3.43304	0.271555	44.9503	1.17438	-1.69438e+19	0.560755	0.207441	4.44444
mp-867303	AgAu3	0	0.0426838	0.00231087	79.3835	1.82086	4.02409e+20	0.109626	0.00914554	41.5006	0.00599823	-4.02409e+20	0.109626	0.00914554	41.5006
mp-1529	LuIr	0	0.103524	0.0205764	11.2852	25.8196	3.82638e+21	3.86931	0.3352	39.2188	0.358699	-3.19547e+21	3.6672	0.321098	38.5963
mp-1129	ScIr	0	0.00679113	0.0270298	0.125936	29.8319	5.08047e+21	5.12564	0.451255	38.2815	0.439862	-4.1838e+21	4.91182	0.446907	36.4366
mp-11248	LiAu3	0	0.0602115	0.00321245	81.1455	2.50059	4.90245e+20	0.172255	0.0153725	37.5094	0.011426	-1.13812e+20	0.0656248	0.00365403	76.1106
mp-11476	HoIr	0	0.0674565	0.016827	8.02651	21.7114	3.50637e+21	3.23196	0.294648	36.3282	0.274326	-3.22729e+21	3.15247	0.288373	36.1446
mp-30746	YIr	0	0.0581881	0.0198735	5.01001	23.2326	3.54028e+21	3.53701	0.322542	36.314	0.32737	-3.12777e+21	3.42422	0.314901	35.8575
mp-865020	HfMgIr2	0	0.0676062	0.0340563	2.79694	21.7637	2.72013e+21	3.07836	0.282115	36.0445	0.382286	-2.07902e+21	2.82966	0.264407	35.0099
mp-10015	SiOs	0	0.064617	0.00389124	67.6687	2.64746	4.65507e+20	0.186637	0.0173285	35.3474	0.0144913	-4.65507e+20	0.186637	0.0173285	35.3474
mp-11274	BePd	0	0.0591786	0.00283078	95.5847	2.7652	1.11252e+21	0.293039	0.0306179	29.6091	0.0110995	-4.83072e+20	0.169051	0.0135315	44.1579
mp-381	SiRu	0	0.0649023	0.00478652	49.9298	2.07717	4.04065e+20	0.167308	0.0186078	26.9608	0.0137179	-3.47845e+20	0.151838	0.0161332	28.8729
mp-19	Te	0.408307	1.60811	0.268032	14.6958	17.8106	1.10383e+21	2.95792	0.340661	25.5856	1.4531	-2.43226e+20	2.33953	0.287491	23.2144
mp-1603	TmGa3	0	0.0667235	0.00315621	97.2007	9.86486	9.65184e+21	2.39671	0.277037	25.4458	0.0415878	-9.44446e+21	2.38483	0.277581	25.1826
mp-1486	ZnNi	0	0.097545	0.00383355	128.353	5.71412	2.41119e+21	0.874279	0.101236	25.379	0.0353451	3.53779e+21	1.14668	0.154919	20.1375
mp-398	ErGa3	0	0.0662354	0.00324482	92.2251	9.53618	9.37698e+21	2.35027	0.278256	24.5477	0.0412454	-9.27512e+21	2.34483	0.27851	24.4291
mp-2688	HoGa3	0	0.0650535	0.00329598	87.6857	9.17705	9.35494e+21	2.31238	0.280214	23.7058	0.0402881	-9.15502e+21	2.30188	0.280697	23.4837
mp-1307	LiGa	0	0.0833464	0.0115431	19.4021	10.7611	7.13646e+21	2.59551	0.326335	22.4306	0.0812615	-3.86945e+21	1.88766	0.251143	20.6064
mp-11418	TbGa3	0	0.062771	0.00340417	79.1811	8.29523	9.13645e+21	2.19066	0.280663	21.8065	0.0372322	-8.94267e+21	2.17814	0.280922	21.5898
mp-11452	HfOs	0	0.0502258	0.0081794	15.2163	19.089	1.46821e+22	6.19832	0.801846	21.4919	0.158628	-1.3321e+22	6.01296	0.796505	20.7419
mp-867168	Sr2SbAu	0.632597	1.72142	0.20965	23.5282	12.1725	5.07988e+20	1.73452	0.225304	21.3607	3.45779	-3.65278e+19	1.73174	0.208327	23.9665
mp-977	LuIn3	0	0.0752404	0.0037066	91.4564	8.03045	7.67139e+21	2.03074	0.26384	21.3536	0.0406263	-7.572e+21	2.02449	0.263515	21.2944
mp-21177	TmIn3	0	0.072476	0.00383458	82.1702	7.88677	7.62124e+21	2.02095	0.266648	20.8654	0.0405126	-7.52611e+21	2.01426	0.26645	20.7851
mp-1291	ErIn3	0	0.0714864	0.00394219	77.2199	7.8281	7.52774e+21	2.01671	0.268586	20.5751	0.0412017	-7.34106e+21	2.00363	0.268214	20.4175
mp-12411	Li2ZnGe	0	0.0283641	0.155859	0.0776347	13.4228	6.39189e+21	3.40007	0.45493	20.4322	0.489466	-6.54515e+20	1.73022	0.380079	9.71274
mp-21431	HoIn3	0	0.0698658	0.00402664	72.2741	7.82184	7.4213e+21	2.02152	0.271291	20.3406	0.0420008	-7.32987e+21	2.01616	0.271185	20.2716
mp-21381	ThPb3	0	0.0513273	0.00424299	42.0741	1.40468	4.59845e+20	0.14279	0.0192252	20.2415	0.00854542	-4.59845e+20	0.14279	0.0192252	20.2415
mp-20236	DyIn3	0	0.068748	0.0040976	68.722	7.75655	7.43524e+21	2.02471	0.274266	20.058	0.0420987	-7.34518e+21	2.01946	0.274217	19.9853
mp-11541	ZrOs	0	0.0336696	0.00594722	13.4706	16.76	1.5874e+22	5.82307	0.794126	19.8561	0.126247	-1.48687e+22	5.71857	0.790636	19.4521
mp-1067	LiAl	0	0.0896185	0.0134736	17.1542	9.67631	9.78271e+21	2.81097	0.38513	19.7185	0.0634138	-6.78381e+21	2.39607	0.363204	16.9443
mp-506	MgPd	0	0.066653	0.0029603	106.838	4.93117	3.86854e+21	1.04615	0.143814	19.6196	0.026671	4.29546e+21	1.13215	0.164152	18.1128
mp-20131	YIn3	0	0.0717297	0.00414962	71.8681	7.73708	7.30215e+21	2.04213	0.281253	19.5649	0.0434924	-7.20897e+21	2.03415	0.28111	19.4653
mp-20920	TbIn3	0	0.0668856	0.00417157	64.2023	7.58221	7.29919e+21	2.00057	0.275611	19.5563	0.0418326	-7.21106e+21	1.99389	0.275567	19.4631
mp-2393	YTl3	0	0.0879943	0.00421679	95.3255	6.81602	6.23457e+21	1.75404	0.248555	18.7467	0.0397802	-6.13747e+21	1.74605	0.247658	18.72
mp-867192	Sr2AsAu	0.5282	1.47594	0.205226	19.2865	9.95472	3.26244e+20	1.44622	0.20787	18.3512	3.05145	-3.41339e+19	1.47397	0.204235	19.3881
mp-11564	TmRh	0	0.0314852	0.00967796	5.86793	8.72887	4.92549e+21	2.13574	0.307476	18.3064	0.0798887	-4.45522e+21	2.0376	0.292087	18.4252
mp-436	SmRh	0	0.0914221	0.0142702	16.2155	11.6675	5.01529e+21	2.95725	0.42829	18.1437	0.146532	-4.78301e+21	2.92436	0.427117	17.9154
mp-191	YRh	0	0.000867989	0.0118461	0.0198338	10.0596	5.0472e+21	2.53151	0.368357	18.0163	0.107264	-4.59431e+21	2.43333	0.35508	17.9395
mp-11561	TbRh	0	0.0282761	0.0121646	3.5439	10.4874	5.25017e+21	2.68032	0.390019	18.0157	0.114019	-4.83804e+21	2.59956	0.381278	17.8027
mp-232	DyRh	0	0.0110597	0.01161	0.929743	10.072	5.2709e+21	2.57379	0.375167	17.9689	0.105327	-4.8371e+21	2.489	0.364283	17.8599
mp-2381	ErRh	0	0.0189699	0.0100668	2.58679	8.89206	5.01765e+21	2.22315	0.324562	17.9269	0.0838075	-4.55706e+21	2.12514	0.309992	17.9496
mp-19977	SmIn3	0	0.0601231	0.00435773	51.2473	6.83161	7.10383e+21	1.89877	0.278277	17.8235	0.0391628	-7.01997e+21	1.89384	0.278197	17.7618
mp-15988	Li2CuSb	0.465002	1.53041	0.531066	4.89204	13.6777	5.41701e+21	3.69961	0.545153	17.679	1.51473	-5.85422e+19	1.47162	0.528081	4.65203
mp-2163	HoRh	0	0.00657138	0.0104788	0.496615	9.067	5.10147e+21	2.30966	0.341148	17.616	0.0881902	-4.80303e+21	2.25028	0.332418	17.6128
mp-162	Yb	0	0.0676	0.023565	4.8587	12.3709	3.03293e+21	2.83223	0.419779	17.5252	0.246505	-3.03293e+21	2.83223	0.419779	17.5252
mp-20724	Mg2Pb	0	0.0796179	0.0674451	1.2826	9.23509	1.32893e+21	1.64354	0.249019	16.9559	0.322665	-8.19375e+20	1.4674	0.249386	14.273
mp-21197	NdIn3	0	0.0592801	0.00451216	47.6196	6.32519	6.8512e+21	1.802	0.274157	16.8513	0.0371554	-6.76935e+21	1.79775	0.27397	16.809
mp-932	ScGa3	0	0.0534284	0.00321549	67.7311	6.64381	1.05697e+22	2.23144	0.346889	16.3152	0.0315572	-1.05697e+22	2.23144	0.346889	16.3152
mp-2415	DyTl3	0	0.0786225	0.00412924	83.0836	5.59645	6.43507e+21	1.60121	0.250188	16.191	0.0317537	-6.33652e+21	1.59247	0.249008	16.1729
mp-20903	PrIn3	0	0.0592103	0.00459926	46.1918	5.93953	6.62315e+21	1.72391	0.270356	16.1015	0.0353449	-6.54237e+21	1.71773	0.27002	16.045
mp-20729	LaIn3	0	0.0728713	0.00505235	54.7766	6.00691	6.36743e+21	1.76217	0.282722	15.5608	0.0390356	-6.27196e+21	1.75301	0.281776	15.5175
mp-1780	ScRh	0	0.010644	0.00974673	1.14122	8.87304	7.62814e+21	2.81021	0.453027	15.4497	0.0783934	-6.85054e+21	2.68217	0.433803	15.3742
mp-570835	NiHg4	0	0.0383405	0.0111645	6.36399	7.01536	3.50763e+21	1.75251	0.288034	15.008	0.084034	-3.39097e+21	1.73644	0.287996	14.8051
mp-866132	Na2TlSb	0.416702	0.48017	0.191509	3.97015	8.40722	3.24725e+21	2.1044	0.349653	14.7651	0.79899	-2.36236e+19	0.369157	0.154585	3.69033
mp-2026	PrTl3	0	0.0715836	0.00514421	51.9089	4.86609	5.85668e+21	1.4393	0.240082	14.6786	0.0292904	-5.67631e+21	1.41917	0.237272	14.6279
mp-2001	LaTl3	0	0.0783619	0.00564585	51.7087	5.30054	5.44867e+21	1.55669	0.263481	14.3608	0.0373368	-5.44867e+21	1.55669	0.263481	14.3608
mp-2212	ScCo	0	0.0224651	0.0125457	2.39618	10.6638	8.89232e+21	3.79684	0.645856	14.2538	0.116001	-8.04986e+21	3.64661	0.620228	14.2563
mp-2431	ErTl3	0	0.074515	0.00389248	83.7579	4.91799	6.99285e+21	1.57829	0.269361	14.1833	0.0274348	-6.99285e+21	1.57829	0.269361	14.1833
mp-2693	SnSe	0.114206	0.573083	0.14017	8.26695	5.96806	1.25199e+22	2.32678	0.397296	14.173	0.572746	-1.18137e+20	0.606997	0.145946	8.48188
mp-2624	AlSb	1.2273	1.574	0.274567	13.7257	9.35669	9.73035e+20	1.84769	0.315847	14.1491	2.60854	-3.78799e+19	1.53221	0.267983	13.6715
mp-2540	VTc	0	0.0262008	0.00454302	13.8501	9.19771	2.45582e+22	4.51268	0.771409	14.149	0.0424215	-2.36016e+22	4.43476	0.759261	14.1162
mp-20284	PdF2	0	0.175751	0.0259183	17.6579	2.55685	1.58965e+20	0.238944	0.0410376	14.0498	0.0951973	-4.329e+20	0.461184	0.109607	8.63092
mp-2490	GaP	1.5928	1.56374	0.270794	13.8768	9.30434	1.02546e+21	1.86938	0.322031	13.9862	2.60434	-3.70967e+19	1.51795	0.264087	13.7805
mp-3522	MgCuSb	0	0.0242885	0.0155502	1.95209	6.21821	1.1806e+22	2.41257	0.417524	13.8898	0.0333607	-1.07313e+22	2.33231	0.423184	12.9386
mp-817	TmTl3	0	0.0704949	0.00374337	81.7226	4.92075	7.46964e+21	1.63706	0.283366	13.8859	0.0270393	-7.36914e+21	1.62888	0.282323	13.8585
mp-571458	RbGeI3	0.999705	0.83465	0.187748	9.37331	7.28791	1.06405e+21	1.36684	0.23666	13.88	1.28141	-2.31419e+19	0.580767	0.15211	7.46049
mp-580364	HoCu5	0	0.00325931	0.011232	0.156316	7.28348	4.33047e+21	2.05978	0.356832	13.8687	0.126571	-2.51416e+22	8.36085	5.93068	1.67386
mp-11522	Ni3Sn	0	0.0243118	0.0420288	0.439951	13.1987	1.53816e+22	5.80081	1.00977	13.7689	0.13613	-1.31763e+22	5.52081	1.01775	12.634
mp-11304	Li2CdPb	0	0.0128866	0.00905029	1.69907	5.96709	6.39317e+21	1.90576	0.331825	13.7638	0.0458461	-6.1351e+21	1.87171	0.326278	13.7397
mp-2343	Mg2Sn	0	0.0212843	0.0879494	0.119053	5.6325	6.95391e+21	1.84693	0.321715	13.7552	0.209516	-7.55531e+20	1.09441	0.302079	6.89588
mp-22899	LiI	4.2337	1.07419	0.472936	3.4231	20.4867	4.29593e+22	12.8329	2.23614	13.748	1.14796	-5.231e+19	0.961782	0.451464	3.10943
mp-5920	LiAlGe	0.0723959	0.493173	0.280821	2.32732	7.13614	9.74004e+21	2.65251	0.466484	13.5591	0.395205	-1.52918e+20	0.601312	0.30218	2.80707
mp-91	W	0	0.0206842	0.00248674	23.9891	2.75367	8.34285e+21	0.977152	0.174788	13.2183	0.00832661	-8.34285e+21	0.977152	0.174788	13.2183
mp-1564	NaTl	0	0.0921672	0.00801933	38.9634	4.10499	4.4444e+21	1.2133	0.221675	12.805	0.0305545	-3.72693e+21	1.09766	0.19879	12.975
mp-3161	LiAlSi	0.124696	0.59405	0.304346	2.72699	6.2952	1.23275e+22	2.64077	0.486481	12.6473	0.512596	-1.17986e+20	0.626255	0.310976	2.85783
mp-252	BeTe	2.0176	1.06943	0.417083	4.1058	6.39269	1.43505e+22	2.85026	0.530787	12.4436	1.53264	-3.89217e+19	1.05195	0.408383	4.13421
mp-32	Ge	0	0.488937	0.117665	8.47051	4.92167	3.87862e+21	1.42729	0.266236	12.4128	0.553118	-7.67035e+19	0.455539	0.112187	8.18224
mp-408	Mg2Ge	0.187201	0.769316	0.324865	3.6442	5.46279	5.01881e+21	1.74511	0.328773	12.229	0.69812	-1.14536e+20	0.803137	0.328919	3.8155
mp-718	SnPd3	0	0.237964	0.0462146	11.6842	8.09834	1.20994e+22	3.53785	0.676876	11.9494	0.130543	-1.91527e+21	1.53756	0.545586	4.73102
mp-16238	Li2AgSb	0.142901	1.08388	0.247202	9.18113	7.97225	7.58939e+20	1.66549	0.319953	11.8764	1.18824	-1.18747e+20	1.15213	0.253801	9.67185
mp-936	Hg4Pt	0	0.0820513	0.0136253	14.7777	6.56179	1.11212e+22	2.78585	0.535996	11.8493	0.0754886	-3.04612e+21	1.53623	0.352241	9.10806
mp-19871	PbAu2	0	0.0766804	0.0258074	5.12166	4.8556	1.13051e+21	0.987402	0.19035	11.8144	0.1147	-1.08305e+21	0.968185	0.186143	11.8623
mp-715469	WO3	1.1268	1.97113	0.354004	13.1389	8.22377	3.76857e+20	1.87472	0.362054	11.7827	3.12916	-5.99486e+19	1.98426	0.352977	13.3284
mp-85	In	0	0.0133525	0.00140262	29.3721	0.494972	1.57004e+21	0.10969	0.0214248	11.5844	0.000975351	-1.57004e+21	0.10969	0.0214248	11.5844
mp-20849	Pd3Pb	0	0.147578	0.0619101	3.68037	7.95655	1.13548e+22	3.47895	0.679721	11.5792	0.11276	-1.50593e+21	1.21761	0.521222	3.57049
mp-20539	ScIn3	0	0.0664092	0.0042025	62.8174	4.33105	7.92314e+21	1.69236	0.337405	11.2334	0.0266595	-7.92314e+21	1.69236	0.337405	11.2334
mp-2172	AlAs	1.51899	0.84657	0.379724	3.32884	5.76775	6.27548e+21	2.12613	0.428355	11.0581	1.3115	-3.22074e+19	0.833182	0.370394	3.37375
mp-771798	WO3	1.3994	1.94389	0.373007	11.8969	7.7876	4.08014e+20	1.88012	0.38758	10.684	2.95228	-6.11505e+19	1.94832	0.370899	12.0395
mp-21008	Ni3Ge	0	0.0857576	0.0393198	3.22101	10.429	1.90872e+22	5.81066	1.20609	10.5747	0.116227	-5.1361e+21	2.80134	1.1365	3.86985
mp-9124	LiZnAs	0.547507	0.258	0.219514	1.2742	6.8366	1.58823e+21	1.78177	0.375252	10.3465	0.304525	-8.10656e+20	1.4141	0.354431	7.96933
mp-1550	AlP	1.63021	0.821935	0.381994	3.15625	4.92234	1.33508e+22	2.42145	0.510661	10.3255	1.27055	-3.20366e+19	0.806128	0.371908	3.19119
mp-20628	NaIn	0	0.0689527	0.00842775	23.4024	3.36639	7.42204e+21	1.36633	0.2898	10.2373	0.0205645	-5.95483e+21	1.23085	0.260924	10.2455
mp-828	SiNi3	0	0.0633686	0.0368673	2.25346	9.85986	2.1134e+22	5.78686	1.22818	10.2275	0.101753	-5.50592e+21	2.72599	1.18219	3.50151
mp-1367	Mg2Si	0.2361	1.05948	0.329161	5.77465	6.61065	8.77695e+20	1.50806	0.32144	10.1619	1.0475	-1.08704e+20	1.08078	0.330438	5.9152
mp-899	InRh	0	0.0761285	0.00598366	45.3807	3.38868	5.50544e+21	1.2623	0.271063	10.0494	0.0244282	-4.5391e+21	1.12346	0.2314	10.6977
mp-3136	NaNbO3	1.5331	2.20989	0.446338	11.0169	7.80009	4.68739e+20	2.10999	0.458177	9.88258	2.98883	-6.99021e+19	2.21669	0.445477	11.0999
mp-10182	LiZnP	1.3612	0.787435	0.359017	3.24826	6.51466	4.96225e+21	2.44113	0.532846	9.80581	1.25739	-2.98163e+19	0.77255	0.352446	3.24527
mp-20389	Na2CdPb	0	0.0272065	0.0124601	3.22646	3.85068	4.59727e+21	1.38227	0.302666	9.75992	0.0385626	-3.85058e+21	1.27211	0.28217	9.57238
mp-12793	NdAl	0	0.00574116	0.0141077	0.259607	5.02138	4.81339e+21	1.85225	0.407376	9.69522	0.0623787	-4.42922e+21	1.7881	0.396729	9.56859
mp-2235	YbRh2	0	0.101455	0.00656021	60.8177	5.38962	5.72824e+21	2.10899	0.464075	9.68787	0.0640101	6.09785e+21	2.21421	0.501489	9.2776
mp-30759	LiMg2Tl	0	0.0298516	0.00538611	13.0478	2.88187	9.12622e+21	1.30139	0.287133	9.64914	0.0132715	-8.82048e+21	1.27935	0.282906	9.61657
mp-4262	BeAlB	0	0.0103899	0.111929	0.0282814	4.22053	1.14093e+22	2.05999	0.454595	9.6463	0.128723	-5.53201e+20	0.685348	0.346862	2.77735
mp-4170	NaTaO3	2.2603	2.20743	0.462207	10.437	7.77841	5.19846e+20	2.13806	0.473116	9.60677	2.851	-6.95289e+19	2.20972	0.461504	10.4771
mp-1885	AlIr	0	0.0219539	0.00813835	4.43061	6.09596	1.4356e+22	3.24614	0.719779	9.57752	0.0451135	-1.27303e+22	3.05557	0.677277	9.58273
mp-862631	Ba2SbAu	0.629005	1.02317	0.22038	10.0037	5.36466	1.78444e+20	1.01598	0.225736	9.54837	2.2762	-2.88164e+19	1.02401	0.215223	10.3783
mp-614013	CsSnI3	0.464906	0.853623	0.259848	5.95414	5.23046	1.24944e+21	1.29999	0.289812	9.5003	1.57396	-2.69554e+19	0.853424	0.271643	5.56865
mp-570213	LiMgBi	0.361898	0.307506	0.19874	1.92465	5.79272	2.17494e+21	1.72277	0.386092	9.4255	0.220213	-1.91991e+20	0.479029	0.249962	2.65297
mp-11388	GaIr	0	0.0162474	0.00707058	3.48331	6.21147	2.4526e+22	3.99374	0.897388	9.38859	0.0361983	-1.80778e+22	3.45943	0.844037	8.29782
mp-30449	MgCuBi	0	0.015558	0.00854059	2.45866	3.5698	6.74232e+21	1.49209	0.335881	9.36299	0.0267612	-6.15501e+21	1.44147	0.332199	9.03882
mp-76	Sr	0	0.0581535	0.0244844	3.66042	6.26811	2.83054e+21	2.04897	0.4624	9.32773	0.144111	-2.83054e+21	2.04897	0.4624	9.32773
mp-19886	ThSnPt	0.673795	2.281	0.508361	9.50453	8.68176	1.00253e+21	2.72073	0.620674	9.17769	2.56908	-7.43797e+19	2.25675	0.503716	9.483
mp-149	Si	0.624406	1.29687	0.322113	8.0785	6.33374	8.27932e+20	1.55276	0.355419	9.13153	2.04054	-3.95188e+19	1.27231	0.317743	8.01265
mp-20023	PrIn	0	0.0186689	0.0149502	1.39543	4.42238	3.80356e+21	1.57037	0.359739	9.12062	0.0609699	-3.5573e+21	1.52483	0.350963	9.05609
mp-214	ZrRu	0	0.0301674	0.00664846	9.6655	6.51211	2.10607e+22	4.06965	0.932694	9.11438	0.042679	-1.97191e+22	3.96408	0.915054	9.01662
mp-284	AlCo	0	0.0652837	0.00927112	18.6857	6.57885	1.46722e+22	3.66372	0.840806	9.09579	0.0558896	-1.29012e+22	3.42942	0.77983	9.22212
mp-935811	KNbO3	1.4302	2.08151	0.453229	9.84221	7.3525	5.11953e+20	2.03507	0.467428	9.08438	2.72987	-7.06121e+19	2.08179	0.452226	9.87689
mp-2802	HfRu	0	0.0195063	0.00782028	3.9394	5.84584	1.79812e+22	3.4812	0.802325	9.03793	0.0385306	-1.64979e+22	3.3479	0.777685	8.93208
mp-646824	Ca3Ag8	0	0.0761096	0.0158081	10.5643	0.828665	1.39209e+20	0.097574	0.0225948	8.97406	0.0189633	5.1398e+19	0.0499237	0.00826144	14.8551
mp-14105	AlTlO2	2.2128	3.88694	0.806341	10.5836	9.42286	9.54959e+20	3.63014	0.844112	8.91834	3.63772	-1.54148e+20	3.87291	0.809013	10.4742
mp-21043	RbPbF3	3.1584	2.86761	0.685321	8.55932	9.25144	1.51066e+21	3.21182	0.748371	8.89102	2.59144	-1.05644e+20	2.8728	0.686254	8.56509
mp-21	Ca	0	0.0899259	0.0105531	24.8748	3.62643	3.36623e+21	1.26084	0.295846	8.79816	0.0463141	-3.36623e+21	1.26084	0.295846	8.79816
mp-15724	KNa2Sb	0.672094	0.14422	0.236053	0.477554	6.34174	2.75829e+21	2.2157	0.532895	8.47822	0.290851	-3.78154e+18	0.0989776	0.119816	0.750811
mp-3614	KTaO3	2.0983	1.97402	0.466978	8.69123	7.032	5.79299e+20	2.00183	0.481845	8.46799	2.47534	-6.50009e+19	1.9679	0.465835	8.68273
mp-2534	GaAs	0.188697	0.377522	0.138107	4.51948	3.47709	2.75673e+21	1.16339	0.280359	8.45307	0.313247	-1.55187e+20	0.492696	0.152314	5.81782
mp-12599	PrTl	0	0.0255888	0.011619	3.2683	3.75095	4.79322e+21	1.50804	0.364227	8.42478	0.0422051	-4.35529e+21	1.44094	0.350549	8.33385
mp-11568	SmTl	0	0.0155782	0.00999436	1.94601	3.51721	4.63906e+21	1.3972	0.337504	8.42306	0.036702	-4.55795e+21	1.38656	0.335432	8.40432
mp-1541	BeSe	2.6874	0.85528	0.383796	3.32668	4.17939	1.94065e+22	2.67189	0.647731	8.37791	1.31762	-3.54653e+19	0.845369	0.378359	3.33975
mp-11221	SmAl	0	0.00906688	0.0126237	0.608702	4.11179	6.13025e+21	1.81158	0.44152	8.31112	0.0448829	-5.24976e+21	1.69035	0.415015	8.21994
mp-20298	SmIn	0	0.0183956	0.0125633	1.77181	3.72824	4.5441e+21	1.49397	0.365861	8.2516	0.0436091	-4.35506e+21	1.46452	0.359167	8.23373
mp-110	Mg	0	0.0185489	0.00188951	30.7576	1.1171	8.7399e+21	0.55449	0.136819	8.15867	0.00254079	-8.63382e+21	0.550504	0.135539	8.18547
mp-571405	NdTl	0	0.0106346	0.0111957	0.925769	3.41536	3.97147e+21	1.32293	0.3278	8.10758	0.0404335	-3.82466e+21	1.30204	0.323059	8.09122
mp-864908	MgTiIr2	0.0425994	0.358639	0.163737	3.24165	7.3374	3.89018e+21	3.00009	0.744946	8.08192	0.548048	-4.23043e+20	1.37909	0.32023	8.93706
mp-570276	ZrZn	0	0.0253823	0.0340603	0.643316	5.42972	2.43297e+21	1.86013	0.462494	8.06596	0.150931	-2.14689e+21	1.76326	0.437016	8.10457
mp-570223	CsGeBr3	1.1564	0.87095	0.242874	6.79077	5.00385	4.87677e+20	1.13326	0.2824	8.03892	1.25167	-3.26456e+19	0.677091	0.208044	5.87136
mp-1121	GaCo	0	0.0869859	0.00849329	32.7763	5.50012	1.42603e+22	3.28938	0.82059	8.02567	0.0469808	-1.19267e+22	2.98221	0.72901	8.27384
mp-30758	Li2MgPb	0	0.0113109	0.00513843	3.26587	2.87858	1.10716e+22	1.56866	0.391429	8.02256	0.0153055	-9.91029e+21	1.49424	0.402858	7.14339
mp-753304	Hg	0.292604	0.653837	0.170015	7.54179	4.04353	1.85626e+20	0.711678	0.177738	8.01225	0.685762	-1.07494e+20	0.664745	0.171253	7.64758
mp-13033	MgTe	2.3186	0.214952	0.251245	0.791346	5.33622	3.10477e+21	1.97586	0.49442	7.98894	0.400803	-7.87033e+18	0.180085	0.19781	0.868645
mp-10194	LuSbPt	0	0.424089	0.320408	1.52276	6.78077	1.49437e+21	2.17796	0.545406	7.97986	0.473059	-7.30329e+20	1.74725	0.496921	6.59329
mp-1156	GaSb	0	0.504343	0.127939	7.82679	3.46159	1.48697e+20	0.539879	0.135281	7.97236	0.682503	-4.75837e+19	0.406742	0.114113	6.72943
mp-1876	SnS	0.0599059	0.470599	0.139048	6.22632	3.94844	3.64187e+21	1.51142	0.378808	7.96986	0.415047	-1.38775e+20	0.552674	0.15511	6.72577
mp-2201	PbSe	0.431001	0.501406	0.222015	3.39398	4.12751	3.14569e+21	1.51451	0.380514	7.94054	1.00736	-1.45542e+19	0.418813	0.189789	3.2781
mp-30377	ErPbAu	0	0.1881	0.128292	1.77534	5.15633	1.65448e+21	1.59067	0.400029	7.92927	0.300669	-5.81108e+20	1.15492	0.356977	5.81925
mp-1328	SrRh2	0	0.105113	0.00801878	47.4594	4.1502	4.65415e+21	1.74383	0.442405	7.82574	0.0571694	4.65415e+21	1.74383	0.442405	7.82574
mp-867673	Na3(Pt3O4)4	0	0.0962943	0.0119	23.0186	5.82177	2.737e+21	2.13182	0.54109	7.82029	0.182177	3.81596e+21	2.83194	0.890829	5.66806
mp-364	AlRh	0	0.0306914	0.00601843	11.516	3.45395	1.16406e+22	1.95067	0.495201	7.81813	0.0214858	-1.0797e+22	1.87218	0.470758	7.93092
mp-866062	HfSiRu2	0.170806	2.0418	0.677546	5.23132	8.17831	8.89779e+20	3.14361	0.798719	7.80823	2.08298	-3.03602e+20	3.07396	0.755338	8.20982
mp-19845	TiPbO3	1.58451	3.40371	0.780144	9.11312	8.01141	7.80551e+20	3.14577	0.802441	7.76194	3.24287	-1.29923e+20	3.39172	0.781283	9.04519
mp-37	Th	0	0.02948	0.00274595	35.1764	1.33142	6.43534e+21	0.621159	0.159438	7.68981	0.00477431	-6.21521e+21	0.607717	0.154577	7.7953
mp-20012	InSb	0	0.497941	0.153688	5.83188	3.60851	3.19593e+20	0.688959	0.177003	7.67927	0.472258	-1.08385e+20	0.515932	0.155221	6.05987
mp-129	Mo	0	0.00501	0.00193642	4.16158	1.56002	1.39297e+22	0.943422	0.242712	7.66341	0.00392912	-1.39297e+22	0.943422	0.242712	7.66341
mp-20305	InAs	0	0.151082	0.189559	0.711547	3.91614	7.79162e+20	0.964858	0.249016	7.62699	0.249657	-3.87584e+20	0.778149	0.238365	5.89834
mp-435	ThSn3	0	0.0251499	0.003344	20.6255	0.538911	1.11345e+21	0.140914	0.0364015	7.61645	0.00255436	-1.25902e+21	0.152614	0.0410192	7.17644
mp-20228	MnGaNi2	0	0.0851762	0.0145624	14.1458	21.3629	5.46512e+22	23.3539	6.04234	7.59857	0.377537	-5.26054e+22	24.4524	6.6903	6.98736
mp-2121	ScAl3	0	0.0115516	0.00423012	4.51267	2.66632	1.08686e+22	1.4999	0.388845	7.57579	0.0165144	-4.2991e+22	4.13227	2.34496	2.33927
mp-4964	YSbPt	0.112002	0.596472	0.364198	2.09594	7.09425	1.48532e+21	2.45104	0.636522	7.55623	0.734635	-4.97664e+20	1.90037	0.577916	5.96294
mp-644092	Na2LiAlH6	2.6415	1.68504	0.549383	5.37158	6.73575	1.20105e+21	2.19792	0.571979	7.53263	1.67782	-6.98063e+19	1.63376	0.550064	5.11874
mp-117	Sn	0	0.201117	0.07085	4.78258	2.72077	3.96164e+20	0.532442	0.139076	7.49079	0.152496	-2.68973e+20	0.458201	0.125045	7.01431
mp-4651	SrTiO3	1.849	2.69591	0.734103	7.03757	6.87811	7.99212e+20	2.77103	0.726552	7.44839	2.50603	-9.42207e+19	2.7471	0.678287	8.15065
mp-20694	K2Pb2O3	1.7706	2.37214	0.580734	8.25552	6.90181	5.96772e+20	2.39137	0.628703	7.41824	2.71302	-8.78481e+19	2.36978	0.579564	8.26817
mp-16313	TbSbPt	0.098097	0.527357	0.342224	1.9129	6.78174	1.42918e+21	2.3352	0.616974	7.36352	0.686872	-5.09267e+20	1.82695	0.557203	5.93703
mp-2515	CrPt3	0	0.0826719	0.00604674	50.5539	2.62734	4.78295e+21	1.15261	0.305474	7.32933	0.0244769	6.37554e+21	1.40584	0.414636	6.24313
mp-1776	UN2	0.704897	6.08647	1.41741	8.89824	10.883	2.19488e+21	6.28933	1.66862	7.31764	3.78385	-2.98187e+20	6.12956	1.4418	8.76569
mp-12637	Ba2NdNbO6	2.8574	3.06841	0.747134	8.32286	7.28773	6.79087e+20	2.87131	0.768981	7.2152	3.02728	-1.24189e+20	3.06064	0.748348	8.27108
mp-2676	TaBe2	0	0.0579926	0.0133423	9.06173	16.5367	2.99915e+22	15.2019	4.07148	7.21472	0.345002	-2.98694e+22	15.7144	4.34556	6.87666
mp-644246	EuH3Pd	0	0.0883273	0.00719065	43.0517	9.08161	1.33163e+22	5.92907	1.58948	7.20437	0.15689	1.43009e+22	6.29828	1.74887	6.83433
mp-8630	SbIrS	1.42301	5.55768	1.33419	8.50182	9.72542	1.63291e+21	5.11612	1.37269	7.1954	3.63832	-2.49654e+20	5.52168	1.34037	8.3612
mp-20351	InP	0.4679	0.121905	0.19624	0.489611	3.97542	1.0568e+21	1.12697	0.304219	7.12997	0.237484	-2.01911e+18	0.0613403	0.0741509	0.752393
mp-2134	ErAl3	0	0.000483627	0.0038819	0.0439744	2.11484	1.33292e+22	1.32528	0.358112	7.1192	0.0083586	-1.33292e+22	1.32528	0.358112	7.1192
mp-4008	ZnGeAs2	0.0529942	0.497069	0.174613	4.80296	3.69039	4.51893e+20	0.851317	0.230187	7.11241	0.426372	-1.28343e+20	0.576792	0.183058	5.59302
mp-643	ThO2	4.42501	10.3775	2.45992	8.66477	12.7852	3.53029e+21	9.42581	2.55135	7.10104	4.53409	-5.39114e+20	10.2669	2.4734	8.45705
mp-2074	Li3Sb	0.715904	0.816034	0.386667	3.0659	3.91695	9.4068e+21	2.20794	0.598099	7.09286	1.28873	-3.23173e+19	0.81947	0.380747	3.15751
mp-1877	HoAl3	0	0.000855895	0.00396911	0.100136	2.13443	1.32399e+22	1.33798	0.362447	7.09261	0.00858214	-1.32399e+22	1.33798	0.362447	7.09261
mp-567589	DyAl3	0	0.00175606	0.00404351	0.286201	2.1558	1.32729e+22	1.35563	0.368061	7.06857	0.00878676	-1.32729e+22	1.35563	0.368061	7.06857
mp-22184	Ba2SmNbO6	2.857	3.0985	0.76506	8.1505	7.24661	7.10855e+20	2.89964	0.78826	7.05524	3.00233	-1.20647e+20	3.09211	0.766114	8.10855
mp-31455	VSbRu	0.2438	0.970422	0.617312	1.97099	8.57573	3.92668e+21	4.13356	1.12676	7.02652	0.730182	-1.90892e+20	1.25344	0.689529	2.45091
mp-505297	NbSbRu	0.374905	0.748557	0.392548	2.63328	6.09842	4.24493e+21	2.76639	0.754339	7.02295	1.01661	-4.01607e+19	0.704025	0.37422	2.58043
mp-2028	Be2Nb	0	0.0457384	0.0178757	4.09286	16.6103	2.99941e+22	15.7157	4.29366	7.00258	0.370017	-2.98446e+22	16.2712	4.59022	6.67392
mp-31454	TaSbRu	0.708299	0.78147	0.40138	2.71665	6.02956	4.19412e+21	2.7406	0.751922	6.95839	1.17607	-3.30298e+19	0.766248	0.389568	2.75853
mp-11305	Li2CdPb	0	0.0144276	0.00287338	11.2512	1.96854	1.19443e+22	1.20807	0.331624	6.95301	0.00792734	-1.18926e+22	1.20674	0.331922	6.93217
mp-602	Te2Mo	1.0113	2.9637	0.823639	6.82568	6.45157	7.06774e+20	3.12877	0.862868	6.90467	2.53511	-1.23481e+20	3.03891	0.790601	7.53599
mp-30413	TbPbAu	0	0.303274	0.17092	2.36353	4.4078	1.8579e+21	1.52841	0.421568	6.90335	0.37054	-3.90611e+20	1.01886	0.340776	5.16975
mp-1479	BP	1.2437	1.37892	0.367987	7.25372	5.08925	3.50666e+20	1.39308	0.387273	6.82241	2.12233	-4.6241e+19	1.37536	0.363755	7.35207
mp-7251	Ba2YNbO6	2.8565	3.1863	0.808578	7.82254	7.1972	7.49218e+20	3.00159	0.835977	6.80354	2.96558	-1.27295e+20	3.17935	0.810059	7.77556
mp-10378	Cs3Sb	0.621399	0.216261	0.272113	0.708503	5.02323	2.30961e+21	1.90828	0.531583	6.80153	0.373807	-7.41918e+18	0.167684	0.193438	0.807091
mp-12640	Ba2DyNbO6	2.8568	3.16563	0.803164	7.82501	7.1895	7.56382e+20	2.98176	0.830774	6.7996	2.95813	-1.29577e+20	3.1584	0.804743	7.77525
mp-22865	CsCl	4.98811	0.373875	0.400801	0.90094	5.00413	7.41537e+21	2.73263	0.767076	6.72378	0.552344	-1.81577e+19	0.368321	0.382357	0.945444
mp-12641	Ba2HoNbO6	2.85671	3.17541	0.811264	7.74384	7.16312	7.74856e+20	2.99479	0.84124	6.71691	2.94445	-1.33599e+20	3.16765	0.813132	7.68888
mp-768	TmAl3	0	0.000405612	0.00382337	0.0345538	1.97448	1.31746e+22	1.28314	0.361007	6.70098	0.00789656	-1.31746e+22	1.28314	0.361007	6.70098
mp-653337	YbBa4(CuO3)3	0	0.236394	0.0372677	15.9755	3.23068	5.21213e+20	0.76458	0.215637	6.67651	0.194388	8.61344e+20	1.0964	0.375657	4.98613
mp-6653	Ba2ErNbO6	2.8512	3.1896	0.821924	7.64465	7.11856	7.52572e+20	3.01904	0.852097	6.66914	2.93147	-1.27641e+20	3.18321	0.823518	7.59955
mp-12642	Ba2TmNbO6	2.85471	3.20786	0.8302	7.59538	7.13077	7.64842e+20	3.04125	0.860656	6.64254	2.92553	-1.30157e+20	3.20158	0.831942	7.54931
mp-12644	Ba2LuNbO6	2.8519	3.23921	0.84703	7.47843	7.10345	7.76276e+20	3.08068	0.880279	6.54695	2.91314	-1.31706e+20	3.23319	0.848989	7.4318
mp-5077	NaLi2Sb	0.706394	0.610437	0.295239	2.97304	3.10357	8.94942e+21	1.81236	0.518607	6.53298	1.18007	-2.44001e+19	0.619123	0.288798	3.13888
mp-1052	NaAu2	0	0.0281901	0.00426133	17.0149	3.20027	1.37411e+22	2.16011	0.620188	6.50022	0.0210889	-1.35928e+22	2.15714	0.623635	6.4331
mp-765360	Ni(Pt3O4)4	0	0.271304	0.0305316	26.4886	7.03749	4.62211e+21	3.56291	1.0245	6.48548	0.238443	-4.27743e+21	3.43641	0.976456	6.60205
mp-2176	ZnTe	1.0787	0.217518	0.204962	1.09328	3.58785	8.00442e+20	0.99658	0.286799	6.4774	0.287649	-3.26754e+18	0.0911448	0.107337	0.782484
mp-542065	CdAgSb	0	0.0272656	0.00490272	13.115	2.27545	8.55984e+21	1.31415	0.378676	6.46498	0.0146608	-8.37209e+21	1.30409	0.377925	6.40993
mp-305	TiFe	0	0.0372671	0.0102034	6.98028	6.52792	2.72831e+22	5.6445	1.63458	6.41696	0.0578182	-2.54686e+22	5.47299	1.58975	6.38769
mp-2547	YbPd	0	0.073162	0.00869792	24.3953	2.05558	5.96556e+21	1.06165	0.308494	6.38416	0.0185504	1.2629e+21	0.423733	0.12054	6.59088
mp-11279	TiBe	0	0.11655	0.0289117	8.09393	5.8408	4.58531e+21	2.90494	0.846687	6.3551	0.155198	-4.25289e+21	2.82105	0.823255	6.34329
mp-21276	PbS	0.582895	0.572693	0.249243	3.48297	3.32446	3.71032e+21	1.48792	0.433752	6.35339	1.16096	-2.00737e+19	0.540337	0.231976	3.55495
mp-10644	TaTl3Se4	2.25469	4.64388	1.23813	7.26399	8.25369	1.27175e+21	4.37346	1.27567	6.34793	3.26221	-2.11959e+20	4.62374	1.24003	7.20012
mp-19962	Sn2Pt	0	0.0118491	0.00397542	5.14578	4.37626	3.42558e+22	4.12088	1.21676	6.23271	0.0226346	-3.41109e+22	4.13446	1.23237	6.14495
mp-2449	NbRh3	0	0.0262385	0.00451637	14.0031	11.0134	4.29728e+22	11.58	3.42211	6.22472	0.130959	-4.16857e+22	11.6534	3.53345	5.98937
mp-2730	HgTe	0	0.190997	0.251639	0.661259	3.96673	8.40464e+20	1.17737	0.348486	6.21001	0.260961	-6.51061e+20	1.09822	0.348929	5.58379
mp-6613	Ba2YTaO6	3.36199	2.25146	0.659587	6.30651	6.19359	8.24047e+20	2.33556	0.692579	6.19274	2.26893	-8.55658e+19	2.24891	0.658933	6.30515
mp-2998	BaTiO3	1.6663	2.62806	0.758312	6.45178	6.57515	8.56059e+20	2.6729	0.793101	6.18703	2.42028	-1.08579e+20	2.62957	0.758996	6.44865
mp-12558	LiMgAs	1.3965	0.713352	0.337715	3.06995	3.17146	1.00756e+22	1.99892	0.593278	6.18451	1.20927	-2.81434e+19	0.709147	0.333443	3.1015
mp-20741	ReO3	0	0.0452037	0.00458848	30.9213	4.19326	1.05582e+22	2.70058	0.801879	6.18048	0.0458505	-1.04359e+22	2.69496	0.802709	6.15165
mp-22704	YIn	0	0.0293401	0.00982689	5.15903	2.74549	7.05428e+21	1.54627	0.461962	6.12374	0.0263897	-6.7868e+21	1.51744	0.452778	6.13537
mp-20185	LuNiSb	0.216099	1.63591	0.578953	4.74978	5.73821	5.97332e+20	2.05706	0.614755	6.12094	1.50837	-2.07377e+20	2.0152	0.609096	6.01795
mp-13001	Ba2HoTaO6	3.3832	2.21638	0.655771	6.21354	6.10607	8.15765e+20	2.30952	0.690891	6.1118	2.24416	-8.51522e+19	2.21359	0.655015	6.21251
mp-4025	TmNiSb	0.252903	1.86532	0.6071	5.38566	5.74737	5.89464e+20	2.08437	0.624813	6.09307	1.69416	-1.74104e+20	2.06741	0.621501	6.06704
mp-23703	LiH	3.018	1.09791	0.32469	6.21791	4.16733	2.53808e+20	1.08226	0.32449	6.09113	1.87388	-3.75518e+19	1.1081	0.32583	6.27166
mp-21272	ErNiSb	0.274495	1.96089	0.620454	5.61846	5.74116	6.09284e+20	2.09629	0.631794	6.04384	1.78878	-1.69186e+20	2.10305	0.630225	6.09582
mp-4174	HoNiSb	0.293706	2.03695	0.630891	5.80146	5.75592	6.14464e+20	2.11146	0.636941	6.03566	1.87592	-1.57917e+20	2.13436	0.637242	6.12977
mp-5811	CsPbF3	3.0475	1.26227	0.581329	3.1996	5.16749	3.94492e+21	2.5221	0.761905	6.02272	1.44136	-5.55678e+19	1.2472	0.575724	3.18846
mp-10695	ZnS	2.01859	0.202223	0.25448	0.708378	4.14647	3.10519e+21	1.84435	0.557433	6.01831	0.395934	-7.84372e+18	0.178844	0.199178	0.850842
mp-4510	DyNiSb	0.313706	2.0959	0.640072	5.92534	5.75703	6.19578e+20	2.12596	0.643315	6.00753	1.95242	-1.35821e+20	2.15045	0.643622	6.10729
mp-3716	TbNiSb	0.332101	2.14152	0.646693	6.0261	5.7598	6.33315e+20	2.13594	0.648085	5.98323	2.02159	-1.29023e+20	2.17631	0.648984	6.14087
mp-30878	TbTl	0	0.00800887	0.00772546	1.05553	2.26129	6.71407e+21	1.27279	0.387119	5.9617	0.0189288	-6.60976e+21	1.26395	0.384163	5.96794
mp-22786	ThNiSn	0.284495	1.50733	0.463971	5.85567	5.17568	4.30537e+20	1.76066	0.536323	5.94801	1.49394	-1.63004e+20	1.65478	0.488141	6.24155
mp-2426	LiAg	0	0.0232167	0.00258447	26.9242	0.530687	2.79429e+21	0.222589	0.0678857	5.9373	0.00192434	3.74185e+21	0.274696	0.107192	4.10237
mp-22906	CsBr	4.2433	0.356099	0.376372	0.920299	4.2334	7.49711e+21	2.51167	0.766222	5.93488	0.517596	-1.74506e+19	0.331769	0.352973	0.911258
mp-30365	BeAu	0	0.111209	0.00523212	97.993	2.4191	1.10416e+22	1.61785	0.495761	5.89522	0.0159561	-1.08411e+22	1.60648	0.493789	5.86814
mp-947	Au2S	1.9021	0.657553	0.45878	1.71589	4.23463	8.99199e+20	1.36386	0.41934	5.86553	0.663304	-2.71872e+19	0.533928	0.459042	1.25443
mp-12107	TiPt3	0	0.0493442	0.0224425	3.26023	6.3853	1.23209e+22	4.57972	1.41078	5.84885	0.111045	-1.03177e+22	4.1966	1.27391	5.97914
mp-2513	As2Pt	0.117594	0.489665	0.230437	3.09756	4.346	2.55873e+21	1.87666	0.579858	5.8223	0.401719	-1.25973e+20	0.541306	0.23851	3.41905
mp-257	DyIn	0	0.0291712	0.00857979	6.26928	2.34835	7.23898e+21	1.37919	0.426712	5.8108	0.0203124	-6.99227e+21	1.35652	0.418946	5.8264
mp-21321	MnSe2	0	0.14084	0.0275436	11.5626	1.61827	4.62769e+20	0.387095	0.120531	5.75543	0.0602917	-4.62769e+20	0.387095	0.120531	5.75543
mp-730	P2Pt	1.0645	2.42747	0.854436	4.78862	7.99704	2.29182e+21	4.29927	1.34097	5.74065	1.79934	-1.27017e+20	2.51683	0.872152	4.90222
mp-557664	Cs2TlBiF6	3.07729	1.45448	0.644829	3.38762	5.48742	2.1449e+21	2.39109	0.747444	5.72173	1.50025	-6.34289e+19	1.44258	0.641785	3.36997
mp-567772	Na	0	0.0561318	0.00554199	32.234	1.37175	3.9487e+21	0.665251	0.208559	5.69685	0.0103755	-3.87883e+21	0.659036	0.206095	5.71823
mp-12580	Li2CdSn	0	0.0270127	0.00317818	24.7791	1.63841	1.20939e+22	1.15483	0.362671	5.68212	0.00716103	-1.1991e+22	1.1514	0.362972	5.64977
mp-22864	Bi2Pt	0	0.0300679	0.0150121	2.83459	2.68066	3.42726e+21	1.2579	0.396131	5.65862	0.0446718	-3.35295e+21	1.24675	0.392415	5.66304
mp-865101	NaLi2Bi	0.351503	0.603118	0.271199	3.31644	2.77037	6.8183e+21	1.63798	0.518925	5.60796	1.04225	-3.355e+19	0.582007	0.264145	3.27061
mp-1093	ThGe	0	0.0101911	0.0344497	0.1609	3.51809	2.12812e+21	1.44746	0.458649	5.60647	0.1073	-1.98644e+21	1.40721	0.445098	5.62151
mp-20582	LaIn	0	0.0283252	0.0144323	2.7495	2.90793	4.73518e+21	1.52918	0.484791	5.60219	0.0433921	-4.54372e+21	1.50235	0.476486	5.59864
mp-635413	Cs3Bi	0.186398	0.172173	0.241359	0.602493	4.1929	2.30299e+21	1.80118	0.571658	5.59285	0.208937	-1.48283e+19	0.121019	0.156795	0.678084
mp-11836	ErSbPd	0.2098	1.61795	0.50631	5.71245	5.85232	4.00427e+22	6.29475	2.0039	5.56744	1.56219	-1.76334e+20	1.80837	0.521025	6.46612
mp-1190	ZnSe	1.1693	0.136915	0.199165	0.569978	3.41993	1.92161e+21	1.36842	0.435891	5.56238	0.308948	-3.80227e+18	0.104	0.119847	0.808375
mp-23870	NaH	3.7974	1.56009	0.492712	5.63422	4.67776	4.67422e+20	1.5529	0.497548	5.51394	1.97272	-5.65751e+19	1.56177	0.492498	5.64702
mp-20111	EuAl2	0	0.0456283	0.00835943	12.7522	11.6993	1.97893e+22	11.1175	3.56743	5.50149	0.327959	2.15707e+22	12.1847	4.15637	5.01939
mp-11227	Al12W	0	0.0750074	0.0122752	15.1047	3.75924	8.96471e+21	2.47935	0.795652	5.50077	0.0483054	-8.8471e+21	2.47301	0.795772	5.47843
mp-18981	Sr2CaWO6	3.22709	3.57766	1.05435	6.25056	6.64228	9.542e+20	3.40209	1.10079	5.43327	2.79972	-1.65473e+20	3.5662	1.05805	6.18801
mp-11575	YTl	0	0.000405694	0.0078504	0.0117479	2.13695	7.25177e+21	1.3191	0.428909	5.3935	0.0183873	-7.1311e+21	1.30794	0.425092	5.39704
mp-25173	MgPb2WO6	2.8571	1.19715	0.464652	4.13554	6.17332	2.14465e+21	2.97473	0.969705	5.37293	1.40088	-3.92284e+19	1.09694	0.435953	3.99133
mp-291	TiOs	0	0.0287349	0.0071514	8.05431	4.34152	2.25254e+22	3.95554	1.29449	5.34149	0.0368283	-2.03737e+22	3.77853	1.24825	5.26664
mp-20491	LaInCu2	0	0.0223238	0.00808952	4.58424	5.96148	3.02042e+22	6.03085	1.97529	5.33482	0.0569919	-3.02042e+22	6.03085	1.97529	5.33482
mp-13673	NaSiAu3	0	0.197489	0.055314	6.74623	2.82463	6.81979e+20	0.840056	0.275363	5.32849	0.162203	-6.81979e+20	0.840056	0.275363	5.32849
mp-189	SiRu	0.226494	0.44009	0.444612	0.984784	8.69811	2.12208e+21	6.15164	2.01942	5.31677	1.64222	-1.6967e+21	6.12057	1.97259	5.46553
mp-866141	TiFe2Si	0.402797	5.59467	1.81536	5.41024	8.6052	2.01e+21	6.12532	2.01351	5.30594	3.31938	-4.04244e+20	6.37232	1.88029	6.2389
mp-636328	TiPd3	0	0.0844849	0.0203003	8.49016	5.67113	1.20289e+22	4.31789	1.42751	5.26062	0.101444	-1.14182e+22	4.20297	1.38066	5.31131
mp-213	CaPd	0	0.0362517	0.00684815	12.1796	1.85042	1.03776e+22	1.30755	0.432729	5.25245	0.0111997	-1.01525e+22	1.29273	0.428408	5.24177
mp-632319	CsH	2.6482	1.03152	0.435708	3.6427	4.21879	9.65605e+20	1.533	0.51063	5.20182	1.31126	-3.69414e+19	0.973862	0.426098	3.45527
mp-554310	TlBiS2	0.424702	0.53314	0.277614	2.66133	2.70222	2.63774e+21	1.35929	0.453183	5.19464	0.540866	-1.6207e+19	0.308444	0.213212	1.73999
mp-10623	ThSbRh	0.753102	1.54278	0.482463	5.71822	4.48652	3.83184e+20	1.60331	0.538616	5.13577	2.04037	-6.01689e+19	1.53321	0.474531	5.80771
mp-406	CdTe	0.589399	0.120111	0.200772	0.46272	3.23912	1.24783e+21	1.20554	0.406299	5.11098	0.262788	-2.54644e+18	0.0747112	0.088827	0.771366
mp-1368	Zn8Cu5	0	0.0182214	0.00439294	8.44773	1.98471	8.97299e+21	1.36277	0.459568	5.10634	0.0145911	-8.8718e+21	1.35583	0.457632	5.09959
mp-11374	DyTl	0	0.00427231	0.00700626	0.476173	1.8473	7.32854e+21	1.18579	0.399944	5.10517	0.0146278	-7.21906e+21	1.17711	0.396734	5.11064
mp-570377	Sn3As4	0.392402	0.489361	0.303268	2.04977	3.64525	9.78791e+20	1.29782	0.438302	5.0952	0.383372	-1.3435e+20	0.573226	0.322377	2.37107
mp-13031	MgSe	2.5476	0.216461	0.257439	0.771009	2.95651	6.89227e+21	1.87785	0.635164	5.08349	0.426	-8.58374e+18	0.201333	0.216796	0.894943
mp-3432	ScNiSb	0.269502	1.93357	0.74772	4.15846	5.37949	7.43296e+20	2.3102	0.782169	5.07603	1.62174	-2.12714e+20	2.27156	0.775686	5.01138
mp-10706	ZrRu3C	0	0.00403945	0.00800545	0.35843	17.3182	3.31081e+22	23.8594	8.08229	5.0721	0.733074	-3.22902e+22	26.2059	9.52322	4.56481
mp-550579	ScTa(PbO3)2	2.5856	0.65725	0.332014	2.78523	3.79163	3.63283e+21	1.98925	0.674397	5.06596	1.14351	-2.64613e+19	0.649484	0.321391	2.87279
mp-22895	CuI	1.13631	0.196653	0.260247	0.656856	3.51898	1.81513e+21	1.48804	0.505011	5.05791	0.378561	-7.14177e+18	0.168928	0.192956	0.819152
mp-562	Sb2Pt	0	0.129631	0.0568956	3.43912	3.34388	1.79717e+21	1.40262	0.476164	5.05564	0.139603	-1.35151e+21	1.27021	0.449491	4.75042
mp-22535	HfPbO3	2.4824	0.631058	0.32204	2.74308	3.35415	4.4441e+21	1.87931	0.642974	4.997	1.11881	-2.56375e+19	0.621357	0.310558	2.83007
mp-11537	NbAlRu2	0	0.0332543	0.0843571	0.247508	4.17441	5.93068e+21	2.60585	0.89597	4.96001	0.0954649	-5.04362e+21	2.42611	0.845078	4.86431
mp-1358	DyIr2	0	0.0145875	0.0206502	0.593726	3.28335	4.23483e+21	1.83629	0.637016	4.89425	0.0694816	-4.23483e+21	1.83629	0.637016	4.89425
mp-27853	Hg3(TeBr)2	1.6995	0.381692	0.438368	0.812478	4.61156	1.57155e+21	2.04366	0.712365	4.85914	0.480061	-1.63798e+19	0.317384	0.361374	0.823079
mp-10694	ScF3	6.0792	6.13608	1.945	5.60346	7.75275	1.93192e+21	5.647	1.97164	4.84715	3.14108	-3.29384e+20	6.08072	1.92914	5.59611
mp-567841	Be3P2	0.889105	0.782441	0.413635	2.60167	3.78607	2.41201e+21	1.81561	0.634986	4.83492	1.10745	-3.27576e+19	0.744503	0.397243	2.56575
mp-10712	ScRh3C	0	0.0618898	0.0837622	0.635122	5.3593	7.58354e+21	3.75228	1.31281	4.83216	0.144429	-6.38224e+21	3.51088	1.25537	4.67701
mp-569600	Ge3As4	0.154098	0.452147	0.321279	1.66953	3.04229	2.25686e+21	1.4035	0.491361	4.82744	0.363235	-8.92353e+19	0.438582	0.316411	1.63192
mp-11488	LaTl	0	0.0297577	0.0117368	4.03716	2.38962	5.74701e+21	1.47892	0.519092	4.80897	0.0314316	-5.54221e+21	1.456	0.510939	4.81048
mp-1980	YbNi2	0	0.0596758	0.0118424	11.312	7.66663	6.00577e+22	10.496	3.68626	4.80459	0.0693225	-5.98125e+22	10.5493	3.72976	4.75679
mp-3319	Mg(RhO2)2	1.15629	2.23106	0.744463	5.18804	5.09867	6.84688e+20	2.24734	0.790212	4.7961	2.1578	-9.45681e+19	2.23106	0.744299	5.18973
mp-31451	ZrCoBi	1.1532	3.43177	1.17157	5.01328	6.15292	1.20467e+21	3.28295	1.15592	4.78633	2.39218	-1.63884e+20	3.42163	1.17027	4.9994
mp-13305	SmSnAu	0.0971991	0.703482	0.302916	3.53913	3.52304	3.05388e+20	1.06593	0.375395	4.78477	0.675599	-1.97302e+20	0.992515	0.356693	4.64156
mp-5146	Zn(RhO2)2	0.958099	1.94133	0.654313	5.11058	4.74226	5.55241e+20	1.95778	0.690709	4.77204	2.05566	-7.70315e+19	1.94011	0.6526	5.1259
mp-1356	Sb2Pd	0	0.0639818	0.017452	7.01968	2.85947	5.0808e+21	1.71957	0.607772	4.75902	0.0505838	-4.55628e+21	1.64121	0.587732	4.66633
mp-1020	TaRh3	0	0.0223327	0.00464618	10.5382	7.51915	4.42104e+22	9.39586	3.32105	4.75874	0.0848176	-4.3061e+22	9.40605	3.39916	4.60314
mp-1082	VIr3	0	0.0139334	0.00490401	4.78916	2.8241	3.10796e+22	3.07871	1.08958	4.74968	0.0144481	-3.01133e+22	3.02783	1.07005	4.75983
mp-30743	TmIr2	0	0.0135068	0.0194243	0.579842	3.05464	4.20785e+21	1.73989	0.617321	4.73171	0.0627313	-4.20785e+21	1.73989	0.617321	4.73171
mp-11652	Yb3PbO	0	0.207433	0.109247	2.61638	3.20124	8.15854e+21	2.26282	0.803735	4.72395	0.109035	-1.40496e+20	0.256641	0.139198	2.50345
mp-23259	LiBr	4.92459	0.368397	0.40632	0.86332	3.2128	2.67919e+21	1.59371	0.56614	4.72313	0.540395	-1.80493e+19	0.359768	0.380912	0.917904
mp-22875	TlBr	2.0754	0.511563	0.261164	2.74144	2.732	1.20765e+21	1.04906	0.373048	4.71574	1.01116	-1.84763e+19	0.489374	0.248005	2.77186
mp-912	LaPt2	0	0.189166	0.0166451	38.312	4.03454	4.87881e+21	2.45684	0.87537	4.70195	0.103329	-4.87881e+21	2.45684	0.87537	4.70195
mp-592	TiRu	0	0.0221465	0.00613779	6.85393	4.07445	3.38337e+22	4.63981	1.66059	4.67043	0.0294271	-3.17592e+22	4.49624	1.60478	4.68977
mp-7173	ScSbPt	0.647005	2.96122	1.06582	4.63108	5.75869	1.24837e+21	2.94924	1.05798	4.65424	2.17691	-1.33765e+20	2.96099	1.06545	4.63292
mp-11651	Yb3SnO	0	0.195777	0.111349	2.33136	3.15997	7.60825e+21	2.21123	0.795324	4.63591	0.100635	-1.59771e+20	0.265185	0.155489	2.22728
mp-31624	Sr2TaCrO6	2.7536	1.52448	0.707099	3.16564	5.0061	1.31106e+21	2.33054	0.84032	4.61869	1.40773	-6.37848e+19	1.4903	0.700313	3.10436
mp-71	Yb	0	0.117605	0.0173576	17.6361	4.75506	1.03766e+22	3.75344	1.35493	4.61071	0.0904616	-1.01166e+22	3.71819	1.34449	4.59898
mp-410	YbPt2	0	0.0406146	0.00581624	18.4527	1.198	3.64249e+21	0.65157	0.235288	4.60831	0.0168703	-2.39347e+22	2.83132	2.83854	0.996191
mp-19996	Ba2GdNbO6	2.6513	2.2819	0.787441	4.93308	5.13007	8.2532e+20	2.39943	0.869758	4.58209	2.10904	-1.00493e+20	2.28198	0.78773	4.93064
mp-643002	Mg2H6Os	3.3512	2.20749	0.752189	5.02756	4.74339	5.57177e+20	2.10022	0.762014	4.57567	2.16186	-9.51333e+19	2.20895	0.752339	5.03104
mp-11644	Li2Ca	0	0.0276514	0.00504805	12.82	1.088	3.82226e+21	0.603888	0.219129	4.57493	0.00899129	3.82226e+21	0.603888	0.219129	4.57493
mp-8635	Zr	0	0.0201036	0.00322146	15.5894	2.26262	1.89696e+22	2.1486	0.781038	4.56273	0.0135289	1.95695e+22	2.20449	0.816559	4.4359
mp-541	Ta3Sb	0	0.0490457	0.0235254	3.01019	3.31871	6.62983e+21	2.25105	0.818772	4.55861	0.0620841	-5.79052e+21	2.13705	0.798145	4.38126
mp-18848	Sr2MgWO6	3.2644	4.81403	1.55249	5.46036	6.64585	1.28111e+21	4.47919	1.63512	4.53391	3.00076	-2.43969e+20	4.77268	1.56226	5.33964
mp-22905	LiCl	6.2506	0.490258	0.526323	0.898998	3.46903	2.40109e+21	1.72653	0.630578	4.53056	0.60226	-2.65847e+19	0.480719	0.506651	0.924217
mp-331	ScAl	0	0.0121644	0.0110876	1.14916	3.11499	1.20749e+22	2.57368	0.94052	4.52668	0.0355321	-1.18293e+22	2.5508	0.931578	4.53092
mp-27852	Hg3(TeCl)2	1.9068	0.66523	0.48562	1.60329	4.04568	9.57997e+20	1.64184	0.60006	4.52589	0.559328	-2.22751e+19	0.432943	0.41369	1.07062
mp-697044	Ba2H6Os	1.9668	3.89915	1.27507	5.34754	5.7725	8.02132e+20	3.50481	1.28173	4.52172	2.86668	-1.9767e+20	3.84396	1.27612	5.22796
mp-21484	PuGe3	0	0.079811	0.00818244	30.4628	2.70295	7.13171e+21	1.87797	0.687317	4.51643	0.0382187	8.16878e+21	2.07427	0.805461	4.13268
mp-23818	BaLiH3	2.266	0.872977	0.442071	2.77502	4.03605	2.75251e+22	4.40904	1.61905	4.49391	1.21322	-3.69701e+19	0.857209	0.433129	2.78423
mp-1761	LuIr2	0	0.00838229	0.0185024	0.30493	2.79428	4.30606e+21	1.65988	0.610913	4.47862	0.0556859	-4.30606e+21	1.65988	0.610913	4.47862
mp-14069	CsAlO2	4.27349	0.356337	0.394838	0.85736	4.12814	2.55938e+21	2.1606	0.795393	4.47703	0.522622	-1.69811e+19	0.339646	0.364495	0.899504
mp-37722	KBH4	6.1004	1.87517	0.726605	4.14585	4.00922	4.07785e+20	1.86943	0.688565	4.47348	1.84535	-8.01513e+19	1.903	0.677447	4.70809
mp-571102	TlI	2.2086	0.894543	0.385427	3.53581	3.09459	2.42171e+21	1.54647	0.570927	4.458	1.36673	-3.54464e+19	0.87715	0.375097	3.57597
mp-3464	FeSiRu2	0	0.115018	0.0188686	15.05	5.39484	1.36251e+22	4.8001	1.77636	4.44202	0.103327	-1.30483e+22	4.70878	1.73421	4.47414
mp-28593	Li3BrO	4.2774	1.21379	0.458191	4.31169	3.66134	3.98083e+20	1.27412	0.472078	4.43401	1.55931	-5.11837e+19	1.1876	0.456166	4.20067
mp-552200	Ba2TaBiO6	2.7128	3.54913	1.25007	4.78389	6.41769	1.54644e+21	3.97439	1.47294	4.4323	2.33159	-1.76898e+20	3.59273	1.26614	4.77985
mp-24950	CaTi4(FeO4)3	1.66649	3.21108	1.16012	4.60492	5.91562	1.25089e+21	3.37911	1.25511	4.41756	2.24694	-1.57382e+20	3.23817	1.16707	4.62173
mp-3834	BaZrO3	3.0486	1.52161	0.568515	4.37865	4.0514	5.43652e+20	1.575	0.586425	4.40153	1.74351	-6.28574e+19	1.51506	0.566812	4.37005
mp-2175	TlF	2.20931	0.910057	0.335324	4.47102	3.10016	2.23494e+20	0.92178	0.343423	4.39741	1.53404	-3.24628e+19	0.904782	0.330681	4.52586
mp-715460	CoO	0.587997	0.985716	0.672467	1.77469	5.93884	1.355e+21	3.40778	1.27025	4.39414	1.12722	-6.48991e+20	2.95075	1.12389	4.25414
mp-3676	MgCu4Sn	0	0.0463739	0.00741065	15.654	2.01932	1.65864e+22	1.88188	0.702296	4.38638	0.0125923	-1.64575e+22	1.87624	0.701425	4.37482
mp-3623	MnAlCo2	0	0.0156238	0.0158186	0.98158	15.6255	9.78521e+22	28.6872	10.7115	4.38284	0.264533	-9.5704e+22	30.136	12.1217	3.91998
mp-23167	TlCl	2.1809	0.571437	0.290603	2.75741	2.41041	2.14684e+21	1.15654	0.431863	4.38253	1.07786	-2.11302e+19	0.560796	0.279922	2.83565
mp-14100	Cd(RhO2)2	0.8489	1.89459	0.691774	4.53239	4.56797	6.47345e+20	2.01824	0.753899	4.38014	1.90268	-8.16363e+19	1.88671	0.688769	4.53364
mp-5640	ErSnAu	0.00809539	0.311127	0.217419	1.71184	3.20271	5.05321e+20	1.0754	0.40209	4.3739	0.394663	-3.60261e+20	0.995871	0.383159	4.19021
mp-2868	Th11(Ru2C3)6	0	0.123749	0.0480241	4.13642	0.694225	8.92816e+19	0.114802	0.0429336	4.37248	0.0576387	-4.08039e+22	7.50787	28.9287	0.132215
mp-20465	As2Pd	0	0.0310766	0.0232564	1.54467	2.71132	5.13776e+21	1.73223	0.648047	4.37017	0.052174	-4.14222e+21	1.5669	0.599507	4.22544
mp-1317	CoSb3	0.165105	2.2049	0.848543	4.18862	5.50235	8.94742e+20	3.05608	1.14379	4.36745	1.79536	-1.85286e+20	2.47041	0.909837	4.47411
mp-566472	Mn(RhO2)2	0.924697	2.21498	0.815238	4.47844	4.90709	7.50613e+20	2.35678	0.882704	4.36272	1.97384	-1.05855e+20	2.21828	0.816302	4.47969
mp-3462	TmSnAu	0	0.251872	0.19642	1.45208	3.1495	5.50415e+20	1.0772	0.404979	4.33808	0.35305	-3.98192e+20	0.992799	0.385707	4.12958
mp-18977	Ba2CaWO6	3.18	2.85316	1.02898	4.61718	5.4128	1.00595e+21	2.90452	1.09367	4.32797	2.20385	-1.28378e+20	2.85569	1.03126	4.608
mp-697030	Mg2H6Ru	3.06929	1.9835	0.706649	4.70264	4.29821	4.6462e+20	1.87639	0.709423	4.30158	2.05504	-8.61949e+19	1.9885	0.70696	4.71732
mp-11490	Li2ZnSn	0	0.0192877	0.0027986	18.0929	1.15948	1.48179e+22	1.05215	0.39782	4.30116	0.00465295	-1.40971e+22	1.03694	0.39559	4.24388
mp-11231	YAl3	0	0.00120753	0.00415348	0.156757	2.99985	4.75904e+22	4.02846	1.52388	4.29818	0.0136014	-4.75904e+22	4.02846	1.52388	4.29818
mp-19944	Sr3PbO	0	0.272727	0.218517	1.39433	3.11602	6.91372e+21	2.23122	0.845925	4.28367	0.197133	-2.07135e+20	0.464702	0.287344	2.05664
mp-7562	TaTl3S4	2.5587	3.33518	1.26506	4.28065	5.82922	1.28612e+21	3.41434	1.29455	4.28335	2.205	-1.60054e+20	3.34485	1.26623	4.29335
mp-1102	LuN	0.248794	0.589194	0.223342	4.28482	2.43001	1.00955e+20	0.589338	0.223545	4.28054	1.06738	-3.50855e+19	0.556359	0.210339	4.30183
mp-924128	HfNiSn	0.389	1.54981	0.582992	4.33433	4.00057	4.80533e+20	1.59952	0.608028	4.26677	1.6183	-9.08968e+19	1.54306	0.581982	4.31726
mp-34293	CsTaN2	2.14501	0.880612	0.795377	1.16498	5.09546	2.7935e+21	3.49621	1.33018	4.26118	0.593186	-4.03412e+19	0.822887	0.635056	1.475
mp-7961	Sr3SnO	0	0.257361	0.233471	1.15735	3.2483	6.40795e+21	2.2835	0.869427	4.25651	0.16023	-1.71065e+20	0.373032	0.289261	1.46448
mp-8624	K2Sn2O3	1.4051	2.48038	0.962971	4.13387	5.04764	9.48849e+20	2.57685	0.984697	4.2333	1.98901	-1.11383e+20	2.4816	0.963416	4.13407
mp-1975	TmN	0.168697	0.555576	0.212195	4.23654	2.34749	1.03795e+20	0.556872	0.212957	4.22857	0.817461	-4.83862e+19	0.509713	0.197574	4.14374
mp-13654	Y3Sb4Au3	0.583004	0.916303	0.347822	4.27586	3.06775	2.04331e+20	0.963028	0.369476	4.20803	1.38031	-3.81001e+19	0.85082	0.334426	4.05795
mp-5967	TiCoSb	1.0561	4.89367	2.04339	3.70616	7.12939	3.79768e+21	5.24484	2.01446	4.20109	2.25383	-2.66048e+20	4.90945	2.04126	3.72995
mp-568014	Nb3Bi	0	0.00158143	0.0339371	0.0100592	3.4029	6.73763e+21	2.47755	0.958856	4.15341	0.0762842	-5.13832e+21	2.20735	0.902331	3.82613
mp-19830	ErN	0.131594	0.532394	0.205961	4.15596	2.26976	1.07756e+20	0.535945	0.207783	4.14253	0.698529	-5.76638e+19	0.488846	0.191721	4.07148
mp-9964	Ti3TlN	0	0.0914278	0.0538273	2.21367	7.25293	8.90017e+21	6.33612	2.45672	4.14192	0.296889	-8.41815e+21	6.21309	2.40188	4.16039
mp-697038	Ba2H6Ru	1.8774	3.58317	1.26135	4.78793	5.36381	8.2226e+20	3.28106	1.27461	4.13005	2.60757	-1.79821e+20	3.5521	1.26303	4.71637
mp-24084	KH	3.4696	1.44804	0.553388	4.23278	3.73075	4.23714e+20	1.4553	0.565961	4.12334	1.72572	-5.97374e+19	1.4474	0.552052	4.24534
mp-2488	SiOs	0.517697	6.27026	2.35715	4.33856	7.242	1.88457e+21	6.44062	2.51806	4.09066	3.30207	-4.76818e+20	6.88964	2.42417	4.79126
mp-924129	ZrNiSn	0.498798	1.63253	0.62517	4.21983	3.95948	5.05252e+20	1.67029	0.655387	4.06855	1.75255	-7.34726e+19	1.62553	0.622662	4.21806
mp-2114	YN	0.1472	0.564777	0.221098	4.08262	2.31756	1.18545e+20	0.572857	0.224898	4.06528	0.758438	-5.6852e+19	0.521153	0.207701	3.97458
mp-16363	CoAsS	0.848995	6.53721	2.52793	4.15854	7.27462	2.49846e+21	5.83313	2.29373	4.05546	2.74284	-3.87513e+20	6.44561	2.48975	4.16546
mp-754883	KHoO2	3.9759	1.53322	0.616144	3.9254	3.84665	5.34642e+20	1.64907	0.648532	4.05474	1.62599	-6.64259e+19	1.52186	0.605039	3.9892
mp-22958	KBrO3	3.8455	1.84298	1.11802	2.11644	4.55889	5.85105e+21	3.4296	1.34983	4.04993	1.2985	-9.71047e+19	1.84956	1.04452	2.35627
mp-4551	SrHfO3	3.74131	1.37463	0.541366	4.04614	3.60912	4.25462e+20	1.40392	0.554468	4.02901	1.6491	-5.87558e+19	1.36912	0.539368	4.04421
mp-2291	Si2Ni	0	0.0288661	0.00425774	17.6528	1.19632	1.82811e+22	1.21719	0.481123	4.02397	0.00531502	-1.00131e+22	0.881712	0.325029	4.46793
mp-7959	KErO2	3.961	1.25666	0.569451	3.27825	3.69989	6.36079e+20	1.59914	0.632585	4.0193	1.24946	-6.88022e+19	1.2187	0.548277	3.31393
mp-883	HoN	0.0843009	0.499881	0.197662	4.02174	2.15645	1.1313e+20	0.508525	0.20121	4.01786	0.569734	-6.97337e+19	0.463601	0.186283	3.92607
mp-753774	KTmO2	3.9742	1.07912	0.540976	2.81735	3.58113	6.99991e+20	1.56489	0.619701	4.01283	1.02104	-5.97062e+19	0.995369	0.510082	2.72593
mp-10700	MgNi3C	0	0.0530085	0.0129421	8.28918	12.9755	3.95399e+22	19.8295	7.87099	3.99873	0.374057	-3.93791e+22	20.1986	8.13998	3.90883
mp-30056	CsCaBr3	4.40439	0.430112	0.41111	1.07013	4.12555	1.57229e+21	2.09553	0.831982	3.99732	0.562563	-1.71164e+19	0.367436	0.363079	1.01805
mp-21975	In4Ag9	0	0.0610516	0.0162861	7.25804	0.830386	5.9971e+20	0.27323	0.108591	3.9912	0.0212718	5.82886e+20	0.267683	0.105243	4.05639
mp-29342	Ca3PCl3	1.8419	1.50836	0.609524	3.89288	3.81649	5.79729e+20	1.59688	0.634814	3.98968	1.65053	-6.47609e+19	1.49932	0.607553	3.87673
mp-14712	Li7PN4	3.4744	1.57439	0.618781	4.05849	3.67127	3.44367e+20	1.50659	0.598975	3.98916	1.76608	-7.04584e+19	1.57812	0.621426	4.04695
mp-28069	Ca3AsCl3	1.8384	1.53757	0.620808	3.89777	3.85168	5.60318e+20	1.62403	0.64605	3.9856	1.6603	-6.40514e+19	1.5277	0.618822	3.8789
mp-755556	Ba6ZrO8	2.693	1.87004	0.764666	3.82443	4.24778	6.83002e+20	1.97377	0.785264	3.98492	1.72936	-8.58635e+19	1.86307	0.763883	3.80893
mp-14476	LiRhO2	1.38701	3.55406	1.29549	4.54397	5.51583	1.09072e+21	3.49339	1.3941	3.9667	2.44001	-1.79448e+20	3.54919	1.30272	4.49692
mp-33588	Ca2NF	1.69219	0.420788	0.429661	0.969183	2.59522	1.56226e+21	1.55271	0.622874	3.93581	0.500935	-1.75613e+19	0.391347	0.319507	1.35557
mp-11519	NiSnRh2	0	0.0544278	0.0118192	9.88213	3.03733	1.27064e+22	2.81366	1.13208	3.91826	0.0391067	-1.2429e+22	2.78513	1.12032	3.91972
mp-2857	ScN	0	0.40961	0.196638	3.00646	2.30338	2.90897e+20	0.674114	0.271259	3.91763	0.337297	-1.83147e+20	0.591083	0.246693	3.70884
mp-1410	DyN	0.0514975	0.469543	0.189478	3.90098	2.0554	1.27356e+20	0.491135	0.197926	3.90884	0.475426	-8.04555e+19	0.443161	0.181041	3.8298
mp-24721	RbH	2.96869	1.29835	0.517122	3.9783	3.39532	3.46216e+20	1.30506	0.527772	3.88847	1.62918	-5.15537e+19	1.29738	0.515274	3.99524
mp-2053	Nb3Sb	0	0.0620184	0.0292144	3.09304	3.11599	6.27593e+21	2.31852	0.939748	3.87524	0.0709629	-5.31309e+21	2.16858	0.908138	3.69007
mp-4842	Al2ZnS4	2.494	1.12046	0.463624	3.75702	3.17006	3.57144e+20	1.1486	0.466066	3.86884	1.48675	-4.54044e+19	1.11495	0.464653	3.71697
mp-867112	AcInTe2	0.468199	0.557144	0.196582	4.77127	4.39659	3.67539e+22	5.85694	2.37704	3.86768	1.32012	-1.8667e+19	0.527248	0.179254	5.04449
mp-11869	HfSnPd	0.388102	1.43036	0.572027	3.95404	3.59719	4.3926e+20	1.47575	0.599477	3.86241	1.53975	-7.7928e+19	1.41589	0.56914	3.9239
mp-510404	GdSe	0	0.051458	0.00615933	24.1479	14.9942	1.16017e+23	31.7233	12.9292	3.84334	0.243496	-1.14849e+23	31.9694	13.1815	3.77708
mp-1519	CaTe	1.55359	1.00739	0.406293	3.90427	2.98035	2.47773e+20	1.02103	0.416312	3.84087	1.49401	-4.07606e+19	1.0008	0.401382	3.93716
mp-27294	Ca3AsBr3	1.6657	1.38207	0.568396	3.79154	3.55504	4.72801e+20	1.45337	0.592606	3.84073	1.59575	-5.80999e+19	1.3716	0.565384	3.77858
mp-9705	Ba4Na(BN2)3	2.04411	0.743147	0.527316	1.67304	3.91461	1.57589e+21	2.03035	0.829199	3.83149	0.652278	-2.74139e+19	0.527464	0.444879	1.291
mp-1958	SrTe	1.7736	0.971799	0.390873	3.92022	2.86369	1.9697e+20	0.961806	0.394459	3.8074	1.51693	-3.7503e+19	0.982161	0.389655	4.00178
mp-1779	YbTe	1.4688	0.852706	0.350697	3.79141	2.74877	2.34958e+20	0.883548	0.362917	3.7987	1.37711	-3.21369e+19	0.831884	0.341369	3.80416
mp-23950	K(BH)3	5.0297	3.39462	1.63068	3.00355	6.90801	7.0904e+21	6.10407	2.50785	3.79732	1.84691	-1.88142e+20	3.44045	1.65598	2.9946
mp-2663	Nb3Pt	0	0.10154	0.0213894	10.3433	3.97545	9.5485e+21	3.47162	1.42724	3.79361	0.0837455	-8.62447e+21	3.29425	1.33381	3.88146
mp-286	YbSe	1.9741	0.907432	0.368699	3.86112	2.77696	1.96822e+20	0.906351	0.373313	3.78298	1.45724	-3.40255e+19	0.91151	0.366484	3.92248
mp-2117	TbN	0.0156057	0.430444	0.178702	3.73837	1.92596	1.38293e+20	0.467043	0.192508	3.77887	0.383697	-9.36276e+19	0.420902	0.175642	3.70962
mp-865181	EuGeO3	0	0.195045	0.0214428	27.4335	3.93737	4.33342e+21	2.7152	1.12186	3.76525	0.153743	9.7025e+21	4.95573	2.93453	2.1946
mp-2894	ScSnAu	0.127404	0.679597	0.432166	1.97198	3.46286	4.76121e+20	1.41883	0.586286	3.76471	0.708977	-2.79517e+20	1.31573	0.558805	3.61294
mp-10679	Ba	0	0.175461	0.0245443	19.1137	4.25919	6.61576e+21	3.37473	1.40039	3.74098	0.129407	-6.61576e+21	3.37473	1.40039	3.74098
mp-259	AlMo3	0	0.0497552	0.00882074	13.3968	1.39046	5.74065e+21	1.01255	0.420275	3.7396	0.0147672	-5.35038e+21	0.97098	0.397174	3.82246
mp-3807	Al2CdSe4	1.26121	0.191121	0.218667	0.817122	2.22742	1.92351e+21	1.15016	0.477891	3.73372	0.294578	-3.45151e+18	0.0933238	0.107982	0.803455
mp-1415	CaSe	2.0869	1.05742	0.431272	3.83921	2.97935	2.61377e+20	1.05985	0.44041	3.73318	1.52441	-4.28729e+19	1.06094	0.428723	3.89289
mp-20828	Pt3Pb	0	0.00427651	0.0310419	0.0511344	2.62782	1.16545e+22	2.44064	1.0151	3.72814	0.0561583	-2.87533e+21	1.28541	0.595826	3.16873
mp-419	YbB6	0.0211977	0.221043	0.166661	1.52744	2.27559	3.44433e+20	0.721228	0.300296	3.72208	0.260825	-3.2079e+20	0.710331	0.297976	3.6806
mp-12718	LiPrSn	0	0.0493808	0.0369519	1.54483	1.96743	2.45639e+21	1.09503	0.455946	3.72194	0.0559908	-1.92116e+21	0.978265	0.416469	3.60007
mp-541014	Cs3Sb2I9	1.5434	1.16332	0.467978	3.91933	2.92589	1.78648e+20	1.16577	0.486228	3.71243	1.69916	-5.20872e+19	1.16641	0.448705	4.19115
mp-2758	SrSe	2.23099	1.01752	0.422064	3.74325	2.92495	2.53046e+20	1.02906	0.429256	3.7118	1.46292	-3.92907e+19	1.01021	0.418519	3.75013
mp-1820	YbS	2.2234	0.936269	0.386124	3.77582	2.79463	2.23666e+20	0.940565	0.392627	3.70778	1.44639	-3.76253e+19	0.935204	0.383021	3.81527
mp-1672	CaS	2.38911	1.1029	0.45517	3.77174	3.02842	2.81267e+20	1.10887	0.463713	3.69783	1.5229	-4.3128e+19	1.10385	0.45268	3.80784
mp-14232	LiBO2	7.2811	0.571289	0.571691	0.998945	2.41818	8.12023e+21	2.15966	0.903244	3.69717	0.634662	-3.00588e+19	0.574147	0.500401	1.22902
mp-2795	ZrC	0	0.0326313	0.012655	4.14054	1.3752	7.26382e+21	1.09146	0.456775	3.69365	0.0168381	-2.66505e+21	0.655957	0.259895	4.00974
mp-30373	RbAu	0.569194	0.716223	0.297869	3.7285	2.43701	1.45183e+20	0.719858	0.301355	3.69192	1.31065	-2.7869e+19	0.708531	0.291938	3.78097
mp-1087	SrS	2.497	1.07313	0.448007	3.70724	2.97786	2.76901e+20	1.07887	0.452684	3.67928	1.48235	-4.40077e+19	1.06887	0.446309	3.70623
mp-9993	Al2CdS4	2.46619	0.90876	0.421931	3.1609	2.97069	4.43686e+20	1.11928	0.470583	3.66819	1.01824	-5.3163e+19	0.802751	0.400471	2.83801
mp-1000	BaTe	1.593	0.973114	0.40282	3.75473	2.81043	2.1248e+20	0.973375	0.410163	3.65583	1.46881	-3.8594e+19	0.973497	0.399266	3.80723
mp-3887	Li3GaN2	2.3783	0.477303	0.418869	1.21639	2.24791	2.95507e+21	1.35365	0.571589	3.64445	0.53656	-1.93277e+19	0.373795	0.384331	0.95916
mp-30658	VGaNi2	0	0.00728134	0.0125625	0.441266	14.2767	9.40638e+22	29.6571	12.5399	3.63705	0.285807	-9.22389e+22	31.0502	13.9373	3.32527
mp-1253	BaSe	1.9607	1.03355	0.433074	3.68683	2.88511	2.4914e+20	1.03684	0.439967	3.61776	1.47507	-4.08191e+19	1.03234	0.430394	3.71479
mp-2573	NpAl3	0	0.0165071	0.0169515	0.960933	5.86367	3.28277e+22	7.98187	3.38737	3.61712	0.0896958	-3.22625e+22	7.99919	3.44733	3.53463
mp-8289	SnF3	2.7786	1.33737	0.550389	3.78768	3.27973	3.35179e+20	1.3499	0.57327	3.61338	1.62794	-5.79474e+19	1.33463	0.546593	3.81544
mp-1500	BaS	2.16409	1.07909	0.451508	3.69475	2.92847	2.54623e+20	1.07366	0.456448	3.60753	1.50462	-4.43225e+19	1.08258	0.45049	3.72528
mp-23737	KMgH3	2.458	0.369736	0.396161	0.901633	2.51199	4.11925e+21	1.70374	0.725123	3.60154	0.54212	-1.84309e+19	0.360465	0.378987	0.927594
mp-1932	Nb3Os	0	0.0347541	0.0065175	12.3137	0.8336	3.04728e+21	0.503322	0.214298	3.5995	0.00849523	3.04728e+21	0.503322	0.214298	3.5995
mp-5491	MnAlAu2	0	0.0363514	0.0122315	5.12344	3.58582	2.75798e+22	4.54939	1.93774	3.59739	0.0372145	-2.58342e+22	4.44351	1.93556	3.4784
mp-866640	LiMgH6Ir	3.4054	1.28499	0.552389	3.54798	3.23224	3.91717e+20	1.31012	0.558058	3.59705	1.52784	-5.63692e+19	1.27931	0.551304	3.53488
mp-8978	CsNbN2	1.5266	0.808406	0.519904	1.93892	3.64202	2.76309e+21	2.26714	0.968043	3.58407	1.00219	-3.61954e+19	0.770824	0.491272	1.9654
mp-10699	LuRh3C	0	0.0200705	0.0456631	0.291399	3.43815	7.47605e+21	2.87019	1.22567	3.58348	0.0833388	-6.89658e+21	2.77005	1.18772	3.56171
mp-37405	Al5CuSe8	0.518499	0.226174	0.303073	0.644679	2.58359	9.46838e+20	1.13103	0.484048	3.57175	0.309581	-5.28238e+18	0.125499	0.157334	0.712407
mp-545603	Ba2BiSbO6	1.6618	0.819896	0.34707	3.63088	2.54983	1.78072e+20	0.825317	0.353573	3.56625	1.36634	-3.13568e+19	0.815259	0.341721	3.68499
mp-1216	YbO	3.4728	1.11911	0.475276	3.61317	2.9503	2.63059e+20	1.10954	0.475763	3.56148	1.50225	-4.60622e+19	1.12359	0.476036	3.62619
mp-5778	AlVFe2	0	0.151857	0.193189	0.696917	4.97115	7.54401e+21	4.3365	1.86188	3.55452	0.198332	-6.839e+20	1.04493	0.702478	1.81417
mp-569639	TlCl	2.5976	0.9814	0.415303	3.63263	2.79264	2.39701e+20	0.994914	0.427388	3.55177	1.44183	-3.92478e+19	0.975527	0.409847	3.6722
mp-20493	Mg(InS2)2	1.7646	0.881915	0.383232	3.49098	2.69218	2.61535e+20	0.931565	0.400813	3.54329	1.27252	-3.69457e+19	0.834108	0.371131	3.36932
mp-36526	AcOF	4.2614	0.379699	0.400731	0.922315	4.57507	5.48706e+21	3.61549	1.55713	3.53805	0.558918	-1.92318e+19	0.375779	0.387988	0.953173
mp-29241	Ca3SnO	0	0.362815	0.241868	1.83722	3.07251	8.05601e+21	2.63999	1.13865	3.53035	0.260348	-1.12097e+20	0.380869	0.249099	1.89063
mp-8484	ZnO2	2.134	5.80201	2.18005	4.34179	5.88749	1.37272e+21	5.14794	2.22128	3.52813	3.11894	-3.86359e+20	5.66054	2.19016	4.15502
mp-10894	MnAlRh2	0	0.0600682	0.0174908	6.36433	6.15302	9.17287e+22	11.8525	5.11497	3.52737	0.0839877	-5.76069e+22	11.6167	9.62077	1.32682
mp-37906	LiMgN	2.27069	0.749087	0.350127	3.1294	2.56679	2.99282e+20	0.877376	0.378973	3.52262	0.903677	-3.65711e+19	0.612819	0.328944	2.54282
mp-954	BaB6	0.035402	0.321492	0.201852	2.01003	2.1646	2.69471e+20	0.671772	0.290454	3.51736	0.304387	-2.40122e+20	0.655669	0.287082	3.45158
mp-754943	ErBiO3	3.1234	2.07304	1.01567	2.91596	3.22729	4.07381e+20	2.13208	0.924063	3.50471	1.65581	-1.00315e+20	2.14419	0.877265	3.82118
mp-20273	Ca3PbO	0	0.402422	0.261517	1.90886	3.07847	8.55568e+21	2.71705	1.18037	3.49239	0.300646	-1.22837e+20	0.438966	0.273736	2.03071
mp-2322	YAl2	0	0.0384475	0.0111538	6.39981	5.14778	1.97172e+22	6.07939	2.64182	3.49088	0.0983044	-1.94425e+22	6.12159	2.70458	3.40523
mp-861884	AcGaTe2	0.5545	0.601046	0.203348	5.08159	3.57503	3.86576e+22	5.17664	2.25269	3.48353	1.39499	-1.79921e+19	0.567217	0.186366	5.30976
mp-18986	Ba2MgWO6	3.2253	3.83086	1.55235	3.87666	5.32155	1.30155e+21	3.84691	1.67508	3.48029	2.30226	-2.03681e+20	3.83421	1.56306	3.84194
mp-756	TbAl2	0	0.0424421	0.0119047	6.73164	4.49586	2.02448e+22	5.32401	2.31916	3.47827	0.0735512	-1.99653e+22	5.34636	2.3611	3.40734
mp-593	Al4Cu9	0	0.0714072	0.0110472	16.4337	2.80689	1.27101e+22	2.82045	1.23076	3.46912	0.0399078	1.35058e+21	0.64066	0.180718	6.6748
mp-865	CaB6	0.0383953	0.310589	0.225067	1.62111	2.28037	3.02975e+20	0.749308	0.327053	3.46787	0.330286	-2.60041e+20	0.728904	0.323677	3.37938
mp-10891	MnAlPd2	0	0.0785723	0.0166342	10.266	3.96603	5.54734e+22	6.49659	2.83607	3.46698	0.0473688	-1.99125e+22	4.24774	2.51467	2.19541
mp-673	HoNi2	0	0.0724585	0.0158858	9.74137	1.15482	1.88497e+21	0.61318	0.268314	3.45476	0.0230017	-1.88497e+21	0.61318	0.268314	3.45476
mp-866647	AcCrO3	1.7824	1.88669	0.757281	3.93246	3.48498	3.17901e+20	1.77793	0.778858	3.44894	2.01234	-8.71299e+19	1.8935	0.756315	3.96135
mp-23804	Mg2FeH6	1.9201	2.11926	0.908614	3.56211	3.96114	6.63742e+20	2.09146	0.916306	3.44836	1.81282	-1.03362e+20	2.11918	0.908952	3.55992
mp-21075	HfC	0	0.0482483	0.0106216	9.68142	1.14064	1.46133e+22	1.19449	0.523431	3.44736	0.00938615	-1.55864e+21	0.34133	0.144006	3.64914
mp-315	PbF2	4.40439	1.71075	0.72989	3.58833	3.58196	4.99072e+20	1.71143	0.750469	3.44382	1.7066	-7.70731e+19	1.71062	0.728955	3.59482
mp-568560	TlBr	2.3494	0.902709	0.389863	3.52332	2.63317	2.25463e+20	0.922471	0.404781	3.44032	1.38576	-3.4974e+19	0.892751	0.381431	3.58073
mp-1342	BaO	2.0906	1.14422	0.498752	3.47488	2.93851	3.14839e+20	1.15131	0.505748	3.43471	1.4803	-4.71051e+19	1.14341	0.49686	3.491
mp-2605	CaO	3.64471	1.37331	0.596437	3.49386	3.2068	3.84507e+20	1.3746	0.604343	3.43037	1.57142	-5.91084e+19	1.37391	0.595608	3.50346
mp-574283	GdTe	0	0.0774158	0.008611	26.9565	13.1246	9.55677e+22	28.1428	12.3784	3.42811	0.244229	-9.45131e+22	28.3453	12.6127	3.36906
mp-1164	ThC	0	0.00173017	0.010661	0.0653792	1.62821	7.34637e+21	1.36629	0.601147	3.42643	0.0192474	-6.99184e+21	1.33258	0.585798	3.43099
mp-23279	KBi2	0	0.00356107	0.00348014	1.03509	0.612427	6.37798e+21	0.488656	0.215258	3.42032	0.00299964	-6.37798e+21	0.488656	0.215258	3.42032
mp-29242	Ba3PbO	0	0.179453	0.270404	0.540639	3.10261	2.82632e+21	1.97378	0.870585	3.41375	0.211091	-8.5229e+20	1.23321	0.785619	1.96669
mp-2472	SrO	3.28739	1.21651	0.534459	3.43401	3.00964	3.36304e+20	1.2245	0.5416	3.39955	1.49681	-5.36056e+19	1.21517	0.533238	3.44012
mp-23420	Ge19(PI)4	1.0766	0.953572	0.407956	3.57364	2.53663	1.2656e+20	0.959453	0.424471	3.39831	1.65946	-4.23013e+19	0.930562	0.370851	3.97484
mp-573697	CsCl	4.8492	0.438477	0.468637	0.905037	2.42614	2.46784e+21	1.45529	0.64395	3.3974	0.572456	-2.17419e+19	0.421979	0.445911	0.920586
mp-17862	Ag3Ge5P6	0.5665	0.521535	0.245845	3.08981	1.90312	6.22638e+19	0.508573	0.225046	3.39722	1.18994	-1.92943e+19	0.489661	0.200829	3.80718
mp-803	DyAl2	0	0.0362482	0.0113092	5.7383	4.11749	2.05995e+22	4.97173	2.20307	3.39014	0.0627046	-2.03163e+22	4.9836	2.23727	3.32458
mp-1999	Sb2O3	3.3462	1.94144	0.886551	3.24064	3.92227	2.34113e+21	2.48659	1.10294	3.38513	1.6656	-8.86691e+19	1.93936	0.885508	3.24114
mp-650	Be5Pd	0	0.005464	0.0131783	0.26698	1.63489	7.44769e+21	1.3906	0.617305	3.38107	0.0202573	-6.6853e+21	1.32632	0.603331	3.25941
mp-2358	SmAl2	0	0.0781441	0.0129842	14.7647	4.62896	1.94689e+22	5.53988	2.46254	3.37423	0.0841189	-1.92029e+22	5.57378	2.51303	3.30315
mp-1658	Tl2O3	0	0.185002	0.128811	1.72122	0.57616	2.38845e+19	0.0746286	0.0331783	3.37347	0.0994881	2.43958e+19	0.0770225	0.0352693	3.22725
mp-9437	NbFeSb	0.567004	0.795514	0.411906	2.68395	4.52337	1.16349e+22	4.6337	2.07012	3.34888	1.1695	-3.48573e+19	0.773779	0.394969	2.74208
mp-13853	P3Ir	0.0943963	1.3911	0.888402	1.9594	4.19705	6.51975e+20	2.57217	1.15059	3.34247	1.44833	-3.18627e+20	2.49043	1.0816	3.4939
mp-2016	PrNi2	0	0.0250429	0.013322	2.57736	2.66155	9.61514e+21	2.5032	1.12022	3.34031	0.0449382	-9.40081e+21	2.48021	1.10934	3.343
mp-391	HoAl2	0	0.0322991	0.010692	5.25043	3.74505	2.12925e+22	4.60257	2.06022	3.33911	0.0522511	-2.08595e+22	4.6113	2.09918	3.25581
mp-1569	Be2C	1.1875	0.706069	0.315525	3.3475	2.26027	1.45682e+20	0.708235	0.317187	3.33651	1.24453	-2.70345e+19	0.701083	0.3129	3.35386
mp-546	HoRh2	0	0.0666805	0.011307	14.3211	2.24951	9.4756e+21	2.10734	0.947351	3.31769	0.0321234	-9.27453e+21	2.08662	0.937089	3.32272
mp-4876	Tl3SbSe3	1.0585	1.96002	0.797888	3.85016	3.38937	2.98406e+20	1.8491	0.832108	3.3126	2.18315	-1.08469e+20	1.95558	0.799513	3.82538
mp-10714	TmRh3C	0	0.0346369	0.0387613	0.844717	2.99705	7.71641e+21	2.65657	1.19744	3.30448	0.0692634	-6.93203e+21	2.53128	1.1422	3.29911
mp-643260	Na2H4Pd	2.27991	1.05861	0.51245	2.9691	2.54361	2.42114e+20	1.08362	0.490153	3.28715	1.33604	-4.51872e+19	1.08097	0.470961	3.47732
mp-343	PrN	0	0.197456	0.121733	2.06582	1.56093	1.59596e+21	0.817535	0.369895	3.28581	0.127257	-2.2818e+20	0.38544	0.19289	2.8247
mp-601	PrP	0	0.0122834	0.0312811	0.246067	1.37097	2.31263e+21	0.8077	0.365526	3.28472	0.0347424	-1.72305e+21	0.712394	0.335739	3.09085
mp-1208	ErAl2	0	0.0290301	0.0100672	4.89678	3.43909	2.17137e+22	4.30225	1.95203	3.27199	0.0447203	-2.12693e+22	4.30678	1.98326	3.20006
mp-11572	TaTc	0	0.0246328	0.00474891	11.8135	1.98534	5.55024e+22	3.36104	1.52522	3.27123	0.00792226	-5.48879e+22	3.3406	1.51603	3.27095
mp-20848	TmIn	0	0.020487	0.00610121	6.1531	3.78177	4.37382e+22	5.95686	2.70328	3.27107	0.0335081	-4.35261e+22	5.96867	2.71934	3.25178
mp-1463	LaIr2	0	0.0374567	0.0203938	2.48912	1.86692	4.11735e+21	1.34011	0.608168	3.27098	0.0396346	-3.8547e+21	1.29289	0.58264	3.30553
mp-29243	Ba3SnO	0	0.189277	0.28358	0.545296	2.87372	3.19592e+21	1.94321	0.882099	3.26967	0.203917	-6.70261e+20	1.03885	0.751153	1.62644
mp-11824	Ca3PN	0.8046	0.682407	0.464943	1.77814	2.27201	9.53385e+21	2.15485	0.978403	3.2685	0.945154	-3.25978e+19	0.675542	0.451064	1.83283
mp-316	MnV	0	0.0371988	0.0061156	15.0015	3.11467	6.94042e+22	5.70168	2.59055	3.26525	0.0170327	-6.7074e+22	5.60174	2.54062	3.27396
mp-23268	NaI	3.52549	0.284105	0.324493	0.819241	1.9668	6.64774e+21	1.65554	0.752664	3.26218	0.48506	-1.25948e+19	0.273799	0.291874	0.90856
mp-2823	NdP	0	0.0116381	0.0289217	0.255263	1.33496	2.36821e+21	0.79657	0.362419	3.25852	0.0314536	-1.90996e+21	0.724175	0.340734	3.09844
mp-16720	ThAl2	0	0.0255148	0.00866814	5.05011	2.03061	1.17976e+22	2.06914	0.942916	3.25069	0.0231204	-1.17976e+22	2.06914	0.942916	3.25069
mp-5033	Tl2SiF6	4.9687	1.36118	0.60953	3.33719	3.11013	4.02371e+20	1.38838	0.632724	3.25043	1.54101	-6.17512e+19	1.35884	0.606727	3.35167
mp-30324	Mg5(Si8Pt5)2	0	0.191861	0.063683	5.22933	1.29546	3.14991e+20	0.405569	0.184843	3.25007	0.105181	-3.14991e+20	0.405569	0.184843	3.25007
mp-242	SrB6	0.0348034	0.382348	0.243261	1.97052	2.05826	2.53835e+20	0.665828	0.303502	3.24938	0.336392	-2.10379e+20	0.643703	0.300023	3.14266
mp-23253	RbBi2	0	0.00523181	0.00372965	1.6614	0.598948	6.28005e+21	0.493154	0.225325	3.23788	0.00312201	-6.28005e+21	0.493154	0.225325	3.23788
mp-22052	Zn(InS2)2	1.1259	0.168689	0.218353	0.679031	1.88421	1.95301e+21	1.0721	0.490224	3.23417	0.345775	-4.9907e+18	0.12527	0.138564	0.859603
mp-422	BeS	3.1435	0.880191	0.397533	3.29462	2.45406	1.78565e+20	0.876794	0.401335	3.22913	1.34645	-3.51547e+19	0.882305	0.395468	3.33243
mp-2667	CsAu	1.0239	0.66702	0.303339	3.26074	2.14877	1.30656e+20	0.669471	0.306545	3.22742	1.2266	-2.48769e+19	0.660393	0.295307	3.3442
mp-2599	NdN	0	0.205766	0.122337	2.18134	1.49775	1.6035e+21	0.794821	0.364149	3.22467	0.126065	-2.08715e+20	0.362018	0.183194	2.77798
mp-10622	PrAs	0	0.0129696	0.0280231	0.314859	1.32208	2.5081e+21	0.809792	0.371165	3.22262	0.0299426	-2.05529e+21	0.740884	0.350004	3.07975
mp-715434	NiO	2.3228	2.40819	1.23559	2.72097	4.28205	2.45107e+21	2.96099	1.36226	3.20453	1.61707	-1.24211e+20	2.41824	1.23893	2.72698
mp-1483	SiRh	0	0.0842715	0.0632797	1.53682	2.56893	5.85709e+21	2.11799	0.975099	3.20119	0.0655844	-1.96944e+21	1.10068	0.742369	1.80536
mp-1275	SiMo3	0	0.0255955	0.00494726	11.7679	0.667988	5.52717e+21	0.531732	0.245019	3.19699	0.00429964	-5.0303e+21	0.501256	0.225434	3.31559
mp-19403	Ba2CaMoO6	2.2617	2.57835	1.12435	3.47265	4.19152	8.28422e+20	2.62117	1.20791	3.19663	1.93247	-1.30586e+20	2.5808	1.12815	3.46006
mp-9721	Ca3GeO	0	0.407872	0.275191	1.80441	2.64204	7.14377e+21	2.32641	1.07213	3.19639	0.320479	-9.77486e+19	0.404768	0.274085	1.79465
mp-1357	P3Rh	0	0.0982098	0.12435	0.701877	3.61143	2.85862e+21	2.48011	1.14346	3.19429	0.22843	-2.33225e+21	2.3396	1.12619	2.9943
mp-8062	SiC	1.3923	0.695312	0.318512	3.22538	2.17194	1.35202e+20	0.695598	0.321072	3.18885	1.25077	-2.76488e+19	0.698398	0.31374	3.32124
mp-2602	NdAs	0	0.0103134	0.0263552	0.244795	1.28015	2.77258e+21	0.81692	0.377608	3.18205	0.02722	-2.12126e+21	0.720983	0.347909	2.98324
mp-710	SmP	0	0.00803385	0.0260245	0.171519	1.25326	2.76588e+21	0.799194	0.369556	3.18023	0.0269981	-2.08022e+21	0.708447	0.339807	3.01032
mp-23137	Ba2YBiO6	1.81509	1.18614	0.531405	3.33478	2.84093	2.86347e+20	1.20388	0.557705	3.17151	1.49454	-5.33899e+19	1.18096	0.524588	3.37773
mp-23505	K2TeBr6	1.9851	1.14781	0.509579	3.38056	2.7566	2.36671e+20	1.14834	0.53207	3.17068	1.52231	-5.14627e+19	1.14703	0.502122	3.4526
mp-5710	Ag3Te2Au	0.178398	0.542722	0.255059	3.10388	1.97605	1.50266e+20	0.592907	0.275583	3.15573	0.487319	-1.09502e+20	0.557339	0.260356	3.13205
mp-12525	Sr2LiReO6	1.6835	2.6563	1.16574	3.43962	4.20303	8.73147e+20	2.71219	1.26216	3.14997	1.94108	-1.36302e+20	2.66167	1.16625	3.44782
mp-226	FeS2	0.442906	0.415854	0.517882	0.719557	5.21225	1.08757e+22	5.57464	2.59513	3.14838	0.510415	-2.63111e+19	0.395307	0.458053	0.80173
mp-2784	Na2Te	2.0247	0.242552	0.29339	0.751692	2.14371	3.97485e+21	1.57195	0.73352	3.13719	0.443555	-1.04247e+19	0.226812	0.246883	0.880567
mp-749	SmN	0	0.266612	0.136477	2.73042	1.41677	1.43597e+21	0.738207	0.344521	3.13648	0.167648	-1.59167e+20	0.356238	0.170781	3.01267
mp-545659	Ba2DyBiO6	1.73311	1.00716	0.468379	3.15318	2.65198	2.69029e+20	1.06257	0.496815	3.12786	1.29083	-4.39168e+19	0.962538	0.455958	3.06719
mp-2691	CdSe	0.510105	0.124777	0.201294	0.488041	1.94287	2.79959e+21	1.27203	0.595189	3.12438	0.260109	-2.59237e+18	0.0750408	0.0903796	0.756555
mp-23036	K2SeBr6	1.7095	1.09892	0.494955	3.30828	2.67128	2.21253e+20	1.10052	0.515001	3.12381	1.4856	-4.82466e+19	1.09795	0.486899	3.3862
mp-864755	LiAcTe2	0.598201	0.866299	0.401694	3.16707	2.39777	1.93589e+20	0.871374	0.407918	3.12211	1.29733	-3.72641e+19	0.857228	0.396251	3.18191
mp-635	ScRh3	0	0.0280953	0.00453703	15.4097	0.46745	3.4463e+21	0.323035	0.151315	3.11926	0.00296076	-3.4463e+21	0.323035	0.151315	3.11926
mp-515	TmTl	0	0.00676502	0.00519541	1.48585	3.01995	4.28317e+22	4.86234	2.27816	3.11812	0.0230464	-4.26348e+22	4.86643	2.28842	3.10107
mp-30252	Na10CaSn12	0.6714	1.49105	0.647599	3.49365	2.79575	1.81082e+20	1.42569	0.668589	3.11386	2.00728	-8.04436e+19	1.50653	0.642971	3.58658
mp-1784	CsF	5.26021	0.442721	0.464405	0.930786	2.30726	1.88401e+21	1.35024	0.633213	3.1138	0.593614	-2.44214e+19	0.441011	0.454853	0.954702
mp-929	ZrCo2	0	0.0877046	0.0111377	22.0974	4.86148	1.44789e+22	5.64905	2.64956	3.11316	0.129986	1.52935e+22	5.96367	2.91949	2.91951
mp-292	V3As	0	0.0670476	0.0260045	4.14	3.16241	9.48043e+21	3.13469	1.47347	3.10299	0.0727271	-8.5654e+21	3.0176	1.43639	3.04496
mp-22186	In6Ge2PtO9	1.33519	0.569396	0.277731	2.93552	2.04118	2.18612e+20	0.670148	0.315309	3.09851	0.651954	-3.85653e+19	0.423356	0.238006	2.37234
mp-645	TbP	0	0.012067	0.0236845	0.363665	1.17035	2.98541e+21	0.778897	0.366792	3.0945	0.0221659	-2.43401e+21	0.710184	0.345349	2.94897
mp-1630	Zr3Hg	0	0.0757502	0.0131498	13.826	3.00701	9.34676e+21	2.971	1.40123	3.08737	0.064247	-9.34676e+21	2.971	1.40123	3.08737
mp-5921	TaAlNi2	0	0.0234021	0.00853832	4.53758	1.8686	1.5044e+22	2.1339	1.00651	3.08699	0.0182399	-1.47342e+22	2.1167	1.001	3.07493
mp-1310	TbRh2	0	0.0666742	0.0115466	13.8757	2.01533	8.68853e+21	1.92444	0.908244	3.08427	0.0299721	-8.50115e+21	1.90547	0.897913	3.09137
mp-23209	SrCl2	5.2286	0.550198	0.464373	1.28967	2.86577	1.03135e+21	1.48194	0.700219	3.0789	0.588052	-2.22338e+19	0.43808	0.424361	1.04888
mp-23163	CsBi2	0	0.00630601	0.00419957	1.84002	0.589838	5.77149e+21	0.488597	0.230988	3.07639	0.00342486	-5.77149e+21	0.488597	0.230988	3.07639
mp-22664	HoRh3C	0	0.0435121	0.0331971	1.5006	2.61222	7.76633e+21	2.42726	1.14851	3.07234	0.05706	-7.16922e+21	2.33903	1.1044	3.08223
mp-1144	ErP	0	0.019601	0.0226639	0.804292	1.13111	3.38888e+21	0.788616	0.373243	3.07123	0.0197884	-2.66135e+21	0.711044	0.348093	2.91946
mp-2014	DyP	0	0.0150126	0.0233147	0.5167	1.14698	3.2788e+21	0.791173	0.374471	3.07099	0.0208376	-2.40814e+21	0.68384	0.34099	2.84001
mp-642847	Li4H6Ru	2.388	1.69359	0.806068	3.04548	3.20829	5.18249e+20	1.71539	0.81373	3.06072	1.58145	-8.51048e+19	1.70776	0.80124	3.11169
mp-1778	BeO	6.85081	1.04796	0.49519	3.07862	2.59973	2.71012e+20	1.05234	0.499547	3.05753	1.36388	-4.37966e+19	1.04615	0.494029	3.08152
mp-579560	Cs3Sb2Br9	1.9837	1.58011	0.729499	3.18782	2.82757	2.55776e+20	1.58854	0.754484	3.05508	1.74378	-7.77562e+19	1.59766	0.68665	3.54913
mp-744	HoP	0	0.0173234	0.0229288	0.656718	1.12212	3.78486e+21	0.814808	0.387264	3.05191	0.0203543	-2.51842e+21	0.695561	0.343462	2.88194
mp-755421	Ca6HfO8	4.14799	1.73128	0.806457	3.14543	3.32603	5.57026e+20	1.7348	0.826317	3.04196	1.61832	-8.58655e+19	1.73174	0.806179	3.1483
mp-400	NdAl2	0	0.094769	0.0129222	19.8607	4.07224	1.88376e+22	5.15256	2.45464	3.04125	0.0756496	-1.85816e+22	5.18198	2.50212	2.98046
mp-766506	Li3CuS2	2.0526	0.685135	0.457117	1.83494	2.36872	1.22264e+21	1.24521	0.593575	3.03843	0.695935	-2.91314e+19	0.533564	0.423485	1.41424
mp-11285	Ca3(GaNi)4	0	0.030578	0.017859	2.24041	5.3199	1.52668e+22	6.46831	3.08702	3.03303	0.152225	-1.50664e+22	6.48522	3.12131	2.9949
mp-7171	TmP	0	0.0222119	0.0224432	0.984577	1.10411	3.39561e+21	0.777287	0.371272	3.02924	0.0191686	-2.64216e+21	0.696486	0.344672	2.8725
mp-23383	Rb2TeBr6	2.07919	1.24408	0.56516	3.26597	2.76033	2.44314e+20	1.24012	0.592435	3.02855	1.55765	-5.91884e+19	1.24506	0.55802	3.33282
mp-2286	Li2Se	2.9974	0.84056	0.401411	3.03019	2.32359	2.08315e+20	0.852235	0.40723	3.02747	1.25156	-3.49023e+19	0.829072	0.396259	3.02635
mp-614603	CsI	3.8572	0.380991	0.420546	0.862287	2.16503	1.7634e+21	1.26078	0.602584	3.02646	0.53747	-1.80811e+19	0.365097	0.391383	0.900968
mp-5177	LuSnAu	0	0.171284	0.163515	1.07211	3.35095	3.4706e+22	5.14906	2.4618	3.0249	0.293578	-4.82409e+20	1.00079	0.392494	4.0716
mp-256	LaN	0	0.277593	0.185102	1.83653	1.91597	5.50919e+20	0.78305	0.375118	3.01601	0.230398	-2.90894e+20	0.637008	0.318103	2.83377
mp-29252	Sn2ClF3	3.5509	2.70924	1.25968	3.15414	4.05886	8.17613e+20	2.74502	1.31609	3.01223	1.90406	-1.61201e+20	2.73316	1.25734	3.20494
mp-5396	MnCo2Sb	0	0.0775744	0.0153733	11.3351	5.41315	6.3299e+22	10.2727	4.92526	3.01219	0.0643274	-5.90349e+22	10.2461	5.20944	2.75837
mp-994	YP	0	0.0236233	0.0257016	0.881193	1.15019	3.12324e+21	0.791172	0.37939	3.01147	0.0231617	-2.29486e+21	0.698612	0.346117	2.8676
mp-2183	ThSe	0	0.00381699	0.00555487	0.5696	1.00559	1.04951e+22	1.03288	0.495591	3.00876	0.00687189	-1.03357e+22	1.02398	0.490371	3.0175
mp-1738	SmAs	0	0.0124898	0.0247236	0.35906	1.15655	3.4116e+21	0.81974	0.393397	3.00793	0.0229565	-2.35604e+21	0.707803	0.349828	2.87797
mp-1153	Li2S	3.41121	0.885305	0.425513	3.00103	2.37618	2.25469e+20	0.89941	0.431742	3.00677	1.26415	-3.78987e+19	0.873435	0.421074	2.9875
mp-540957	Cs2TeI6	1.3886	0.887966	0.415474	3.12449	2.34098	1.59366e+20	0.892566	0.428813	3.00302	1.36347	-3.70776e+19	0.882249	0.40135	3.25914
mp-2640	TbAs	0	0.0203842	0.0229464	0.837275	1.1264	3.45949e+21	0.802875	0.3858	3.00213	0.0191217	-2.81895e+21	0.726061	0.362054	2.83988
mp-10731	Ba2PrSbO6	3.68101	0.852965	0.471549	2.4328	2.5685	3.91925e+20	1.08042	0.519363	3.00044	0.883357	-4.44525e+19	0.729507	0.45444	2.0339
mp-95	Sr	0	0.0802872	0.0211531	7.39448	2.68676	7.43252e+21	2.50658	1.20571	2.9975	0.0620818	-7.43252e+21	2.50658	1.20571	2.9975
mp-30253	Na10SrSn12	0.675904	1.46656	0.651694	3.37587	2.72053	1.824e+20	1.40167	0.674251	2.99736	1.96323	-7.86972e+19	1.48299	0.646314	3.47568
mp-10893	MnAlPt2	0	0.0560973	0.0164445	6.30063	5.03642	3.41335e+22	7.8571	3.78064	2.99602	0.0806221	-3.25991e+22	7.77361	3.79245	2.93464
mp-27625	Ge19(PBr)4	1.4182	1.20239	0.544586	3.28072	2.53968	1.53398e+20	1.19193	0.574014	2.99222	1.82441	-6.39127e+19	1.20567	0.524463	3.48555
mp-13944	Li3AlN2	2.93731	0.89531	0.437218	2.93031	2.37829	2.29686e+20	0.908337	0.437781	2.98873	1.23597	-4.0007e+19	0.880796	0.436102	2.87032
mp-13032	MgS	3.3692	0.284827	0.315276	0.858686	1.89267	1.06954e+21	0.945571	0.456428	2.98183	0.482508	-1.27614e+19	0.270277	0.286553	0.916025
mp-570324	Rb2TeBr6	2.1286	1.34542	0.623438	3.17028	2.77708	2.66494e+20	1.34288	0.648219	2.98175	1.5752	-6.31783e+19	1.34602	0.608331	3.29128
mp-1101	TmAs	0	0.0289073	0.0225815	1.44838	1.09547	3.55928e+21	0.791925	0.382428	2.9799	0.01797	-3.02019e+21	0.73598	0.364114	2.87371
mp-1688	ErAs	0	0.0270312	0.0225424	1.3131	1.09733	3.66716e+21	0.801729	0.387442	2.97668	0.0181501	-2.95327e+21	0.729022	0.362798	2.84849
mp-23341	Bi2Pt2O7	0.793498	4.31343	1.79658	3.72017	4.72526	9.92866e+20	4.19117	2.02724	2.97266	2.61353	-2.82279e+20	4.29159	1.84157	3.55749
mp-1990	Mg3As2	1.43101	0.581388	0.32955	2.34324	1.9567	5.72605e+20	0.820544	0.396938	2.97213	0.920684	-2.21397e+19	0.520106	0.302012	2.25997
mp-2384	LaP	0	0.201363	0.132586	1.87165	1.54358	1.40464e+21	0.832016	0.402809	2.96857	0.142833	-2.54721e+20	0.441937	0.227189	2.71306
mp-2627	DyAs	0	0.0224032	0.0227865	0.974874	1.10378	3.53383e+21	0.798259	0.386519	2.96798	0.0188438	-2.82607e+21	0.721838	0.360519	2.83314
mp-568005	YbCsBr3	4.3502	0.34393	0.376411	0.873399	2.11473	3.05528e+21	1.48318	0.719281	2.96103	0.507695	-1.6366e+19	0.320196	0.345141	0.893573
mp-27833	Tl2TeCl6	2.5769	1.69006	0.766122	3.27648	3.12965	3.49523e+20	1.67497	0.81267	2.95897	1.73396	-8.68957e+19	1.69044	0.76398	3.29138
mp-7223	Ca3AsN	0.716693	0.661883	0.434337	1.88118	1.9496	9.14104e+21	1.94609	0.944356	2.95829	0.963688	-3.06334e+19	0.658451	0.422732	1.94396
mp-1189	PrAl2	0	0.0974894	0.0125901	21.5472	3.8717	1.84352e+22	4.95252	2.40531	2.95449	0.0712679	-1.8309e+22	4.96667	2.42771	2.92619
mp-36111	LiMgP	1.5647	0.72706	0.350911	2.98236	2.11452	1.4877e+20	0.729598	0.35441	2.9537	1.20588	-2.88069e+19	0.722056	0.345548	3.0206
mp-8182	As3Rh	9.52398e-05	0.644952	0.555189	1.25207	3.63829	8.93963e+20	2.16596	1.05264	2.95159	0.791583	-4.20113e+20	1.83065	0.892476	2.93773
mp-643293	SrMgNiH4	1.8152	3.90136	1.62856	3.70781	4.36475	7.96001e+20	3.61534	1.75853	2.94782	2.70825	-2.74277e+20	3.82963	1.65879	3.5079
mp-1604	Pt3O4	0	0.0708861	0.0161206	9.22085	1.6837	5.24735e+21	1.40162	0.682007	2.94619	0.0555961	-2.43955e+22	5.30436	9.65309	0.407333
mp-452	CoAs3	0	1.23065	0.958424	1.45501	4.44147	1.47474e+21	3.23095	1.57304	2.94364	1.24448	-3.95891e+20	2.70262	1.30356	2.98526
mp-295	HoAs	0	0.024679	0.0226025	1.14093	1.08339	3.60265e+21	0.793785	0.386964	2.93798	0.0184382	-2.82747e+21	0.714296	0.358576	2.81156
mp-813	ScAl2	0	0.0539175	0.00897446	14.7259	5.8845	2.09655e+22	8.14174	3.96935	2.93762	0.155814	-2.0826e+22	8.19358	4.03953	2.88878
mp-8860	Na3As	0.119295	0.120963	0.20376	0.457403	1.48075	5.58273e+21	1.25822	0.613563	2.93661	0.11846	-4.57414e+20	0.575246	0.329099	2.31095
mp-19282	Sr2ZnWO6	3.4088	5.91378	2.55284	3.52584	5.68525	1.99675e+21	5.7352	2.79859	2.93369	2.64572	-3.84435e+20	5.8925	2.58963	3.43237
mp-569149	K2TeCl6	2.5686	1.66564	0.762991	3.22546	3.09654	3.45442e+20	1.65883	0.809761	2.93202	1.70671	-8.62718e+19	1.66546	0.760642	3.2399
mp-865081	NaAcTe2	0.647903	0.785549	0.380909	2.96161	2.19445	1.71676e+20	0.793371	0.387323	2.9316	1.2189	-3.3473e+19	0.773002	0.373537	2.97694
mp-504723	Ba2NiWO6	3.3435	5.04385	2.37154	3.1017	5.70787	2.43991e+21	5.47732	2.67487	2.93021	2.23713	-3.38087e+20	5.12141	2.40578	3.10599
mp-1785	PrSb	0	0.0170801	0.0233265	0.62656	1.18355	4.98721e+21	0.968559	0.473268	2.92772	0.0187509	-2.579e+21	0.678809	0.368863	2.49645
mp-20962	Ni23B6	0	0.226135	0.0316768	19.0738	3.7188	3.90164e+21	2.99504	1.46427	2.9253	0.216094	5.93514e+21	4.1114	2.41482	2.22156
mp-2530	Li2Te	2.5238	0.793099	0.38255	2.9851	2.17986	1.53696e+20	0.789782	0.386356	2.92267	1.26924	-3.26065e+19	0.802769	0.379791	3.07305
mp-554201	MoF3	2.97439	2.04082	0.912829	3.3429	3.25926	3.70577e+20	1.917	0.938038	2.92147	1.90626	-1.03635e+20	2.0391	0.913409	3.33548
mp-540850	TlPF6	6.3698	2.42587	1.11039	3.22916	3.76333	6.76178e+20	2.42096	1.18676	2.91366	1.87623	-1.28861e+20	2.42599	1.11432	3.2123
mp-20336	USn3	0	0.140753	0.010612	48.3046	9.63773	1.05333e+23	22.8618	11.2129	2.91132	0.15626	-1.04056e+23	23.666	12.3891	2.64015
mp-1555	V3Sb	0	0.0696344	0.0341889	2.90676	3.26663	8.34076e+21	3.25895	1.59873	2.9104	0.092618	-7.42462e+21	3.11654	1.55173	2.84634
mp-571222	CsBr	4.2579	0.413201	0.438223	0.915587	1.92752	2.50073e+21	1.28117	0.629835	2.90115	0.556412	-2.03172e+19	0.396498	0.42053	0.915515
mp-581024	CsK2Sb	0.863404	0.25031	0.263796	0.924302	1.87715	6.06243e+20	0.809431	0.39796	2.90075	0.344409	-6.02953e+18	0.143179	0.168819	0.781059
mp-5478	TlPd3O4	1.09031	5.90273	2.65594	3.31323	5.59582	2.02998e+21	5.54561	2.72665	2.90055	2.53095	-3.96587e+20	5.85975	2.67073	3.24992
mp-933	YAs	0	0.0282575	0.024772	1.21832	1.10563	3.27569e+21	0.79282	0.390207	2.89613	0.0204476	-2.61651e+21	0.715232	0.363254	2.76283
mp-708	LaAs	0	0.163401	0.118001	1.6295	1.49606	1.19784e+21	0.778857	0.383413	2.89525	0.122715	-3.2229e+20	0.46932	0.244998	2.6513
mp-643243	Cs2H6Pt	3.9357	2.29279	1.072	3.12791	3.62098	6.08821e+20	2.26582	1.11624	2.89202	1.8149	-1.19012e+20	2.2924	1.07391	3.11876
mp-10904	AlPt	0	0.113812	0.0170997	17.1713	1.2339	8.39693e+21	1.21058	0.596698	2.88973	0.020749	-3.2668e+21	0.837714	0.471846	2.36561
mp-23231	AgBr	0.741605	0.216693	0.242403	0.845201	1.33036	1.79973e+21	0.78786	0.388495	2.88799	0.437324	-8.97943e+18	0.206051	0.216294	0.92981
mp-6037	Ba2SmSbO6	3.6054	0.768377	0.475497	2.05418	2.48859	4.75099e+20	1.10269	0.544084	2.88524	0.7517	-3.48178e+19	0.612053	0.45084	1.58179
mp-23405	Cs2TeBr6	2.1391	1.33871	0.625357	3.13211	2.74413	2.51782e+20	1.3286	0.656148	2.8813	1.58379	-6.35386e+19	1.34063	0.618707	3.18961
mp-17260	Zn3SiNi2	0	0.0179919	0.00654934	4.55322	3.3382	1.55002e+22	4.08722	2.01962	2.87897	0.0636473	-1.49165e+22	4.06648	2.05773	2.77808
mp-7577	CoSi	0	0.038522	0.112508	0.200349	3.15879	5.99263e+21	2.86087	1.41404	2.87775	0.172608	-2.15703e+21	1.99299	1.19703	2.14834
mp-1700	AlN	3.3339	0.806389	0.395656	2.90964	2.18924	1.77642e+20	0.809624	0.40025	2.87692	1.23444	-3.23766e+19	0.803809	0.391235	2.94491
mp-2589	MgO2	3.7324	9.10444	3.84161	3.64847	6.46219	2.70558e+21	8.24207	4.0787	2.87257	3.33107	-7.31151e+20	8.899	3.89908	3.44801
mp-18062	Yb(Na5Sn6)2	0.731401	1.62605	0.731865	3.31171	2.7888	2.18275e+20	1.53455	0.759884	2.86979	1.97325	-9.05744e+19	1.63324	0.729951	3.34684
mp-677627	Li3Nd3(TeO6)2	3.1317	3.86585	1.94749	2.79675	4.77958	1.2488e+21	4.1639	2.06235	2.86884	2.09288	-3.32947e+20	4.1298	2.00889	2.94754
mp-1586	NdSb	0	0.0163723	0.0222269	0.632186	1.14118	5.20129e+21	0.961137	0.476771	2.86229	0.0168904	-2.31446e+21	0.599475	0.341329	2.32754
mp-560516	Co(RhO2)2	0.814205	1.94695	0.919675	3.08022	3.41366	5.94931e+20	2.0005	0.99294	2.85972	1.68468	-9.84404e+19	1.94688	0.919774	3.07954
mp-2199	Fe3Si	0	0.0139562	0.00830947	2.17667	5.55433	1.38489e+23	14.0835	6.99258	2.85832	0.0403937	-1.38006e+23	14.1125	7.05166	2.83119
mp-10760	MgSe	1.7649	0.627086	0.310519	2.86984	1.915	1.13838e+20	0.627855	0.312143	2.85272	1.14612	-2.47367e+19	0.625213	0.302762	2.96749
mp-542103	TbRh3C	0	0.0427465	0.0281848	1.86779	2.27483	7.71333e+21	2.211	1.0998	2.85044	0.0472296	-7.31181e+21	2.15305	1.06877	2.85929
mp-840	SmRh2	0	0.0597959	0.0122872	10.7357	1.78256	7.66599e+21	1.72079	0.856416	2.84816	0.0281648	-7.66599e+21	1.72079	0.856416	2.84816
mp-1029	BaF2	6.6232	0.508339	0.532314	0.933207	2.86528	3.39658e+21	2.18345	1.08733	2.8456	0.623622	-2.71725e+19	0.504349	0.520664	0.95337
mp-690785	Na2H6Pt	3.63701	0.932208	0.462741	2.85932	2.34549	2.22474e+20	0.943254	0.469778	2.84514	1.26164	-4.06086e+19	0.918686	0.456994	2.85026
mp-1315	MgS	2.7919	0.753821	0.372785	2.87551	2.09825	1.53385e+20	0.756996	0.377302	2.84189	1.20393	-3.14816e+19	0.750055	0.367206	2.91928
mp-19262	Cr2CdO4	2.4816	1.82202	0.8747	3.00637	3.23619	4.8008e+20	1.82927	0.911751	2.84186	1.63973	-9.17775e+19	1.82164	0.874295	3.00751
mp-1558	SrPd2	0	0.106617	0.0160541	17.1144	4.01255	4.16437e+22	6.85919	3.41988	2.84048	0.0481017	-4.16437e+22	6.85919	3.41988	2.84048
mp-3953	CaCO3	5.0016	5.80828	2.78777	3.00737	5.23588	1.87924e+21	5.85697	2.92497	2.83353	2.44072	-4.62145e+20	5.86801	2.75407	3.1101
mp-11843	DyAl	0	0.0399747	0.00887612	9.55749	3.23783	4.99602e+22	5.86449	2.93285	2.82755	0.0275214	-4.9477e+22	5.87569	2.96058	2.79591
mp-27626	Ge19(AsI)4	1.01309	0.836926	0.411449	2.90106	2.12732	1.13558e+20	0.842468	0.42165	2.82424	1.41177	-3.5954e+19	0.799383	0.361201	3.29238
mp-9619	Th(FeP3)4	0.533806	3.44631	1.66297	2.98336	4.4468	1.17239e+21	3.54882	1.77887	2.8178	1.99738	-2.06611e+20	3.47184	1.67654	2.98001
mp-7787	HfSO	2.8879	3.525	1.64088	3.14864	4.17878	9.07485e+20	3.20381	1.60669	2.8158	2.11676	-2.03131e+20	3.48427	1.63745	3.10397
mp-568662	BaCl2	5.4379	1.42781	0.758143	2.58451	3.32152	6.61541e+20	1.92297	0.965772	2.80962	1.24275	-9.05364e+19	1.40502	0.751615	2.55582
mp-9200	K3AuO	0.564595	0.899404	0.445322	2.87026	2.31148	2.3969e+20	0.932061	0.468172	2.80904	1.24564	-3.82871e+19	0.880962	0.43363	2.89572
mp-1239	Sb3Ir	0.054001	0.493886	0.354377	1.64528	3.1015	1.65404e+21	1.98684	0.998292	2.80774	0.555902	-3.59392e+19	0.398343	0.299688	1.53244
mp-2281	SmSb	0	0.0152829	0.020912	0.624768	1.09866	5.84618e+21	0.975569	0.490952	2.8011	0.0148815	-2.68722e+21	0.620109	0.356699	2.29219
mp-574438	ThRu2	0	0.0928616	0.0187157	11.0522	4.7061	2.06711e+22	6.56607	3.30763	2.79694	0.108196	-2.0258e+22	6.59576	3.37051	2.7375
mp-2395	Sb3Rh	0	0.906682	0.543465	2.15489	3.25463	7.62563e+20	1.87108	0.942915	2.79531	0.799332	-2.47276e+20	1.3805	0.7012	2.76242
mp-18797	Yb2V2O7	0	0.237564	0.259701	0.874905	4.31607	2.20297e+21	3.36542	1.69609	2.79501	0.539077	-1.6725e+21	3.12078	1.58437	2.76446
mp-20225	CePb3	0	0.111297	0.00832275	48.9017	14.3257	1.02329e+23	38.6531	19.5285	2.78467	0.425771	-1.01056e+23	40.6768	21.6188	2.5809
mp-6492	Ba2YSbO6	3.5379	0.753449	0.508605	1.80306	2.53101	5.71469e+20	1.21327	0.614364	2.77523	0.715526	-3.42978e+19	0.601992	0.47844	1.41138
mp-2724	TbSb	0	0.0218295	0.0198377	1.15432	1.06558	6.10011e+21	0.96587	0.489326	2.7732	0.0130994	-3.01026e+21	0.626663	0.365633	2.24379
mp-2520	TmSb	0	0.0290579	0.0195247	1.8156	1.0373	5.81527e+21	0.927136	0.470632	2.76499	0.0127809	-3.90836e+21	0.735672	0.405476	2.44387
mp-23949	RbCaH3	3.31339	1.12414	0.561385	2.83359	2.52357	2.85315e+20	1.13587	0.576739	2.76389	1.3555	-4.99674e+19	1.12022	0.557129	2.85117
mp-11176	Ca3(SiIr)4	0	0.00785308	0.0290406	0.140622	9.57803	1.17875e+22	17.0733	8.67452	2.76127	1.43115	-1.09358e+22	21.6084	12.4287	2.29244
mp-1007	DySb	0	0.0234506	0.0196653	1.3022	1.05184	6.18218e+21	0.961464	0.489066	2.75644	0.0127599	-3.15554e+21	0.637926	0.371901	2.24655
mp-217	ErTl	0	0.0051127	0.00579547	0.828595	2.64379	4.24491e+22	4.60537	2.3429	2.75592	0.0208918	-4.22523e+22	4.61014	2.35192	2.74433
mp-7275	BaSi2	0.0342047	0.138105	0.243943	0.425973	5.47189	1.75282e+22	7.47684	3.80515	2.75435	0.291409	-1.14733e+21	1.76521	1.48542	1.29544
mp-542680	Na3In2Au	0	0.0267337	0.0273423	0.966801	2.01772	3.54249e+21	1.56035	0.795838	2.74534	0.0645754	-3.54249e+21	1.56035	0.795838	2.74534
mp-2191	ErSb	0	0.027316	0.0195363	1.65333	1.02744	6.34484e+21	0.953681	0.488442	2.72825	0.012935	-4.10519e+21	0.764422	0.41605	2.49047
mp-21233	Ti3InN	0	0.0310125	0.0424129	0.625256	4.91748	1.16999e+22	5.95385	3.0549	2.72083	0.181602	-1.16999e+22	5.95385	3.0549	2.72083
mp-755044	Tb2CaO4	4.03571	1.16752	0.633752	2.50045	2.59029	4.16697e+20	1.29893	0.666852	2.71853	1.21702	-5.45099e+19	1.15482	0.611119	2.59766
mp-2050	HoSb	0	0.0246633	0.0195592	1.41596	1.02719	6.51352e+21	0.964563	0.495441	2.71649	0.0128348	-4.53449e+21	0.813011	0.434947	2.55559
mp-643279	K2H6Pt	4.0232	1.25638	0.633584	2.79238	2.62881	3.16852e+20	1.26484	0.649677	2.71648	1.39706	-5.77925e+19	1.25266	0.630166	2.80263
mp-561072	Sr2DySbO6	3.6565	0.590252	0.508038	1.25231	2.32764	8.75374e+20	1.30875	0.673017	2.71172	0.600965	-2.53344e+19	0.488049	0.452997	1.11828
mp-753815	CaY2O4	4.15829	1.41717	0.734523	2.67994	2.80291	4.12782e+20	1.44232	0.743128	2.70393	1.40242	-6.98076e+19	1.4114	0.733603	2.6686
mp-22975	Rb2TeCl6	2.65861	1.78617	0.851865	3.03619	3.01402	3.69417e+20	1.76475	0.910219	2.69965	1.72872	-9.7468e+19	1.78632	0.851589	3.03805
mp-569779	ScSbPd	0.279502	2.05399	0.765629	4.39409	7.70656	1.09229e+23	19.1259	9.86767	2.69842	1.7191	-1.85565e+20	2.27817	0.783276	4.96027
mp-643101	Rb2H6Pt	4.08661	1.54015	0.770315	2.82711	2.88548	4.08952e+20	1.54389	0.796901	2.6966	1.50671	-7.73318e+19	1.53943	0.768715	2.83394
mp-537	ErCo2	0	0.084788	0.0265214	5.7162	3.01149	8.8596e+21	3.21706	1.66118	2.69504	0.0813248	-8.49502e+21	3.15163	1.62012	2.71321
mp-10899	AlVNi2	0	0.00139154	0.0117183	0.0409214	9.51207	9.65699e+22	23.3026	12.0399	2.69261	0.177675	-9.44e+22	24.1693	13.2809	2.45502
mp-22394	ThRu3C	0	0.0223559	0.00639232	6.54033	5.03399	3.11742e+22	8.24669	4.26725	2.68656	0.102177	-3.05437e+22	8.3162	4.41838	2.58222
mp-2396	HoCo2	0	0.0914126	0.0271292	6.18518	2.9594	8.31709e+21	3.10479	1.60744	2.68439	0.0822079	-7.96167e+21	3.03865	1.56533	2.70465
mp-2628	DyCo2	0	0.0975026	0.0275953	6.6416	2.90021	7.80983e+21	2.98727	1.55033	2.6747	0.0824389	-7.46301e+21	2.91976	1.50718	2.69632
mp-23302	RbI	3.3455	0.312587	0.348383	0.849907	1.62119	2.0183e+21	1.05725	0.548848	2.67357	0.502855	-1.45029e+19	0.301517	0.320846	0.911009
mp-753418	SrNd2O4	3.6062	1.18623	0.63648	2.54435	2.64666	4.0108e+20	1.30566	0.677824	2.67342	1.21985	-6.23192e+19	1.14527	0.625883	2.47526
mp-361	Cu2O	0.504703	0.947541	0.968919	0.967087	2.28827	8.6244e+21	2.41295	1.25416	2.66866	0.786052	-6.2273e+19	0.946266	0.96713	0.967816
mp-7189	AlPd	0	0.0945415	0.00843373	37.5322	0.982045	6.0672e+21	0.914542	0.477034	2.6545	0.0111855	-5.9782e+21	0.908198	0.475611	2.63872
mp-6265	TbBa2SbO6	3.5073	0.570005	0.468405	1.34241	2.27253	6.37226e+20	1.11431	0.581307	2.654	0.596068	-2.32685e+19	0.453072	0.434943	1.06317
mp-20483	Pb	0	0.0085703	0.0017297	11.029	0.335923	1.57024e+22	0.428501	0.22362	2.65254	0.000694403	-1.29738e+22	0.377486	0.192064	2.75539
mp-27829	Rb2SeCl6	2.6093	1.75711	0.851478	2.96442	2.94985	3.61316e+20	1.73317	0.905679	2.64727	1.70215	-9.59592e+19	1.75733	0.850918	2.9679
mp-361	Cu2O	0.499696	0.947152	0.96748	0.96865	2.26749	8.57896e+21	2.40738	1.26199	2.6347	0.785788	-6.30094e+19	0.945354	0.965286	0.969187
mp-556424	RbVF3	2.458	0.327877	0.548067	0.462718	3.73441	3.97241e+21	3.2911	1.72588	2.63326	0.358072	-1.91775e+19	0.313548	0.520976	0.466907
mp-215	YSb	0	0.0276341	0.0210869	1.5002	1.03483	5.77751e+21	0.953832	0.500287	2.63257	0.0136949	-4.60757e+21	0.849227	0.460749	2.5023
mp-19085	Ba2MnWO6	2.2303	2.16739	1.06172	2.91671	3.2737	5.20854e+20	2.12219	1.11313	2.63243	1.7497	-1.14432e+20	2.16623	1.06366	2.90639
mp-864241	AcFeO3	1.02079	2.40297	1.17604	2.92071	3.43189	5.96647e+20	2.3367	1.22575	2.63209	1.81298	-1.30886e+20	2.40105	1.17953	2.90426
mp-670	NbCo2	0	0.0933193	0.00911886	32.7375	9.84953	8.9965e+22	24.2233	12.7089	2.63142	0.194471	-8.9965e+22	24.2233	12.7089	2.63142
mp-22926	LaBi	0	0.0421951	0.062632	0.552966	1.37205	1.42168e+21	0.803444	0.421562	2.63112	0.0642688	-9.84833e+20	0.681438	0.369276	2.50676
mp-4405	Rb3AuO	0.242902	0.730473	0.411173	2.36794	2.15891	3.22593e+20	0.918074	0.481983	2.62887	0.625776	-1.3021e+20	0.792357	0.432285	2.48157
mp-23171	PrBi	0	0.0205039	0.0230162	0.84082	1.0785	5.23602e+21	0.964137	0.506515	2.62616	0.0174049	-2.22813e+21	0.593351	0.342165	2.28357
mp-11255	PrAu	0	0.00509401	0.00443675	1.23025	2.43152	7.21096e+22	5.21353	2.74197	2.62183	0.0165286	-4.40311e+22	4.18149	2.89607	1.73493
mp-3519	ZrSO	2.43081	3.67421	1.77704	2.97305	4.09262	9.63178e+20	3.40814	1.79283	2.62101	2.10997	-2.24859e+20	3.63831	1.78152	2.91852
mp-19400	Sr2NiWO6	3.36799	6.149	2.93719	3.02906	5.50546	2.3061e+21	6.21501	3.27031	2.61987	2.45637	-4.15263e+20	6.18301	2.98835	2.97613
mp-2514	Mg3P2	1.60681	0.595538	0.384024	1.9312	1.62654	1.27632e+21	0.930991	0.489928	2.61951	0.902682	-2.60768e+19	0.575895	0.372839	1.9197
mp-558039	Sr2HoSbO6	3.6369	0.522694	0.497578	1.07666	2.21649	9.81457e+20	1.30407	0.686611	2.6175	0.57279	-2.40702e+19	0.455582	0.446926	1.02919
mp-559200	Cd(InS2)2	1.0566	0.151329	0.201193	0.652323	1.48839	1.32169e+21	0.857641	0.451598	2.61716	0.327853	-4.31551e+18	0.116885	0.132713	0.826555
mp-11455	HfPt	0	0.00418768	0.00304817	1.61028	3.41553	6.55674e+22	7.13563	3.75866	2.61576	0.0279431	-6.52005e+22	7.14219	3.77628	2.60106
mp-1231	Cr3Ga	0	0.0822667	0.0103812	22.3081	2.99073	1.08983e+22	3.49962	1.85233	2.59689	0.0744681	1.1696e+22	3.76311	2.11581	2.37196
mp-556375	Ba2LaSbO6	3.841	1.2291	0.680962	2.42493	2.71418	4.6408e+20	1.46933	0.777747	2.59669	1.16948	-7.15571e+19	1.1887	0.6669	2.37967
mp-30160	Si(CN2)2	4.2524	4.23324	1.95053	3.19729	4.17049	8.85525e+20	3.94611	2.08884	2.59655	2.48093	-2.83601e+20	4.16997	1.98334	3.04861
mp-4828	HfNi2Sn	0	0.00226998	0.00846472	0.138872	1.21553	1.28911e+22	1.47677	0.781793	2.59615	0.0107288	-1.25987e+22	1.46191	0.777355	2.579
mp-18337	Be3N2	3.3129	0.654085	0.402089	2.07476	1.80759	4.61608e+20	0.785411	0.415974	2.59445	0.939137	-2.77385e+19	0.627561	0.394349	2.00753
mp-11370	ErIn	0	0.0224595	0.0069561	5.80166	2.82084	4.40809e+22	5.18953	2.75003	2.59231	0.0252334	-4.36619e+22	5.19263	2.77469	2.56011
mp-693	Pr3Tl	0	0.00608215	0.0101161	0.466192	2.55241	3.03443e+22	4.1484	2.19871	2.59161	0.0290253	-1.68035e+22	2.91497	1.85751	1.96587
mp-2197	BaHg	0	0.0141824	0.00619467	3.46415	3.25783	3.02182e+22	5.3145	2.81704	2.59122	0.0440056	-3.00143e+22	5.36765	2.90129	2.51646
mp-569423	Ga	0	0.0146022	0.001471	31.2758	0.247482	1.13124e+22	0.287464	0.152393	2.59077	0.000576398	-4.3422e+22	0.775255	0.807535	0.940642
mp-644203	CsCaH3	3.1884	1.01431	0.527284	2.66801	2.29937	2.49281e+20	1.02786	0.544999	2.59004	1.28169	-4.71693e+19	1.00889	0.520784	2.69637
mp-24292	Sr2H6Ru	2.26161	1.6757	0.857734	2.73064	2.95699	4.87097e+20	1.7106	0.907683	2.58714	1.51945	-8.45847e+19	1.67403	0.856031	2.73471
mp-568681	Mg8BPt4	0	0.0482631	0.0146941	5.95259	0.849349	1.53804e+21	0.510831	0.271114	2.58635	0.0210362	1.53804e+21	0.510831	0.271114	2.58635
mp-1347	Th3P4	0.2621	0.526569	0.432992	1.3411	3.17367	4.28001e+21	2.82026	1.49996	2.57819	0.48432	-7.11196e+19	0.496299	0.410958	1.32715
mp-23300	NdBi	0	0.0187425	0.0221499	0.778365	1.04501	5.44981e+21	0.95987	0.511392	2.5715	0.0160794	-2.25811e+21	0.575003	0.337277	2.226
mp-1966	Cu3As	0	0.127131	0.0342422	7.15375	3.05917	1.13847e+22	3.6626	1.95331	2.56761	0.0764592	-1.12051e+22	3.67103	1.98542	2.51423
mp-11249	LuAu	0	0.0117585	0.00416067	4.75099	7.93378	4.73219e+22	16.0593	8.56736	2.56637	0.211826	-4.69126e+22	16.99	9.7059	2.31598
mp-11257	SmAu	0	0.012748	0.0046706	4.50924	3.98807	4.54364e+22	7.52016	4.01355	2.56477	0.051708	-4.49747e+22	7.58381	4.13003	2.48829
mp-2093	Pr3Al	0	0.00636638	0.00841551	0.657988	3.3706	1.96393e+22	4.82947	2.57989	2.56122	0.0625746	-1.96393e+22	4.82947	2.57989	2.56122
mp-2354	Ti3Hg	0	0.138338	0.0196437	18.6885	3.67527	1.35096e+22	4.7025	2.51214	2.5611	0.0995091	-1.31943e+22	4.67032	2.50062	2.5524
mp-6192	Ba2DySbO6	3.4647	0.506868	0.461696	1.15029	2.17202	7.51554e+20	1.12818	0.602836	2.56018	0.571555	-2.15613e+19	0.423633	0.428306	0.983679
mp-503	ThS	0	0.00267804	0.00469361	0.430988	0.689866	1.05133e+22	0.789806	0.422484	2.55602	0.00402009	-1.0191e+22	0.775196	0.412421	2.57695
mp-11258	TbAu	0	0.0247127	0.00487786	11.4034	5.29387	4.59213e+22	10.1819	5.45275	2.55164	0.096524	-4.48888e+22	10.6123	6.22334	2.22679
mp-9295	TaCu3Te4	1.1379	2.40612	1.19585	2.85406	3.31263	5.26634e+20	2.33792	1.2523	2.55083	1.83756	-1.38379e+20	2.40243	1.20106	2.82898
mp-23234	TmBi	0	0.0361373	0.0205329	2.33483	0.993592	6.38965e+21	0.967154	0.518206	2.54971	0.0135241	-2.91538e+21	0.623207	0.363294	2.24679
mp-20620	Ba2NbInO6	3.34861	6.74761	3.20725	3.05159	5.54624	2.46216e+21	6.58052	3.52736	2.54809	2.57496	-4.74983e+20	6.73268	3.25848	2.97002
mp-24155	ZrH2	0	0.0247633	0.0131713	2.57792	1.73317	4.8133e+22	3.30636	1.77233	2.54805	0.0226215	-1.19657e+22	2.07163	1.16869	2.36003
mp-756009	NaCu3O4	0	0.101255	0.0187037	12.5961	1.5361	2.81302e+21	1.15355	0.620143	2.53698	0.0487288	3.20124e+21	1.2702	0.724148	2.32311
mp-558955	Ba2CoReO6	0.195106	0.466715	0.531503	0.822848	4.36792	1.42715e+21	3.90475	2.09952	2.53634	0.989341	-1.14359e+21	3.7886	2.00647	2.59459
mp-14307	Mg(ScS2)2	1.5651	1.04801	0.795306	1.51267	2.79443	1.00064e+21	1.69876	0.915265	2.52858	0.838408	-6.33818e+19	0.974963	0.778908	1.4004
mp-11533	ZrZnNi4	0	0.0329638	0.01675	2.7608	1.98436	8.76225e+21	2.1809	1.17855	2.5173	0.0385817	-8.76225e+21	2.1809	1.17855	2.5173
mp-21065	SiP2	0	0.032134	0.0132145	3.79205	0.832905	3.1059e+21	0.643819	0.348225	2.51395	0.0135452	-2.96181e+21	0.630486	0.342911	2.49311
mp-23245	ErBi	0	0.0335023	0.0204452	2.09762	0.983338	6.53238e+21	0.974178	0.52737	2.51064	0.0131618	-3.11519e+21	0.642466	0.378501	2.21144
mp-23438	BaBiO3	0	0.0401985	0.0331794	1.33355	0.947595	1.22057e+21	0.540789	0.293221	2.50466	0.0325208	-1.12236e+21	0.520492	0.283723	2.48473
mp-7167	SmRh3C	0	0.0393842	0.0229835	2.24316	1.80793	7.93061e+21	1.92816	1.04653	2.50083	0.03473	-7.51961e+21	1.87615	1.01359	2.5183
mp-22866	HoBi	0	0.0313551	0.0202751	1.92317	0.981278	6.42876e+21	0.969602	0.526302	2.50057	0.0130062	-3.15995e+21	0.644504	0.381394	2.19674
mp-22873	SmBi	0	0.020278	0.02116	0.938135	1.00281	5.95826e+21	0.966704	0.524893	2.49939	0.0145357	-2.59192e+21	0.598036	0.354392	2.19212
mp-3172	Ag3AuSe2	0.0260957	0.2206	0.375541	0.450219	1.97608	1.46678e+21	1.24662	0.679971	2.48236	0.148977	-9.66534e+20	1.06889	0.670684	2.01196
mp-22907	DyBi	0	0.0291653	0.0203148	1.72021	0.973778	6.28213e+21	0.960431	0.524368	2.47882	0.0130345	-2.29507e+21	0.522474	0.31947	2.09147
mp-11240	DyAu	0	0.0270139	0.00489052	12.9822	5.65473	4.5923e+22	11.1611	6.09635	2.47718	0.118349	-4.49047e+22	11.8999	7.20682	2.12177
mp-122	Ba	0	0.078319	0.0182319	8.9033	2.64018	1.11318e+22	3.2004	1.74991	2.47333	0.060174	-1.06499e+22	3.14288	1.72252	2.46459
mp-6687	Ba2HoSbO6	3.4155	0.458074	0.45547	1.00859	2.06398	8.69485e+20	1.13629	0.623172	2.46218	0.555898	-2.04448e+19	0.403594	0.42228	0.934364
mp-1339	NbIr3	0	0.000405568	0.00476797	0.0248082	2.14287	6.17003e+22	4.54838	2.49495	2.46146	0.0126209	-6.12558e+22	4.53706	2.49283	2.4554
mp-1294	YCo2	0	0.0765675	0.0289267	4.30643	2.88319	8.94468e+21	3.29126	1.80868	2.4547	0.0837736	-8.59098e+21	3.22953	1.76747	2.4699
mp-4081	TaCu3Se4	1.6313	2.61922	1.30447	2.84515	3.31242	5.53239e+20	2.49763	1.37339	2.45245	1.94445	-1.65035e+20	2.60365	1.31399	2.78925
mp-2889	LaPd3S4	0	0.0186688	0.0279881	0.54477	1.93268	6.06513e+21	1.92172	1.05891	2.44481	0.0495278	-5.71409e+21	1.88061	1.04943	2.39893
mp-6270	Ba2LiReO6	1.8199	2.3856	1.23358	2.68934	3.35831	7.31595e+20	2.40659	1.32663	2.4433	1.7118	-1.35684e+20	2.38695	1.23901	2.67396
mp-4043	NbCu3Se4	1.3951	2.50886	1.27997	2.74419	3.31997	6.12435e+20	2.43519	1.34289	2.44196	1.82903	-1.53868e+20	2.50327	1.28661	2.71386
mp-22921	TbBi	0	0.0269893	0.0203246	1.53022	0.960685	6.59017e+21	0.973291	0.537265	2.43826	0.0130091	-2.1402e+21	0.498494	0.307364	2.06543
mp-631	TiC	0	0.0352436	0.0104232	6.21754	0.990845	1.27892e+22	1.25282	0.692622	2.4327	0.00922461	-4.64473e+21	0.699225	0.366822	2.63174
mp-558501	KBi6IO9	2.2881	0.810453	0.44407	2.46555	1.89264	1.12538e+20	0.804891	0.445903	2.42518	1.27862	-3.94116e+19	0.836269	0.438003	2.63817
mp-12798	Ni3Pt	0	0.00704128	0.00465643	1.85951	1.54195	5.2582e+22	3.13442	1.73919	2.41943	0.007449	-5.19819e+22	3.12544	1.74416	2.39876
mp-1828	ThOs2	0	0.0152654	0.0215856	0.594721	2.91823	2.71709e+22	4.81327	2.67455	2.41426	0.0424597	-2.63038e+22	4.76779	2.68187	2.37038
mp-15661	Sc4C3	0.326999	1.91028	1.00164	2.63378	4.65252	4.05578e+21	4.81759	2.67703	2.41416	1.4101	-1.15249e+20	1.93964	1.01641	2.63619
mp-2444	GaRh	0	0.0217037	0.00542426	8.00371	1.09446	3.86217e+22	2.01012	1.11776	2.41164	0.00462022	-3.82233e+22	2.00233	1.11866	2.39474
mp-30232	Tb3SiBr3	0	0.139499	0.0431308	5.81671	1.64552	8.37493e+20	0.880726	0.490038	2.40944	0.136202	8.95019e+20	0.930931	0.535707	2.29079
mp-643246	YbMgNiH4	1.9011	3.71119	1.77668	3.01895	3.70337	7.13114e+20	3.48372	1.93991	2.40654	2.39616	-2.63158e+20	3.64988	1.81804	2.84454
mp-5899	NdAlO3	4.35671	1.71197	0.968518	2.35008	2.58111	4.34551e+20	1.65221	0.920148	2.40608	1.44819	-8.75839e+19	1.77032	0.949822	2.54457
mp-4230	Sc3TlC	0	0.133681	0.268982	0.350365	3.18022	2.37057e+21	2.55316	1.42258	2.40438	0.351857	-1.18874e+21	2.0723	1.27374	2.07519
mp-6798	Ba2NaReO6	1.8707	2.35994	1.2375	2.63351	3.2928	7.01274e+20	2.37767	1.32659	2.39952	1.69406	-1.28455e+20	2.361	1.24187	2.62138
mp-11661	Zr3N4	0.680802	0.66911	0.472185	1.68686	1.83379	4.61038e+21	1.68803	0.941977	2.39888	0.911795	-3.22896e+19	0.655902	0.454805	1.73189
mp-14753	Li7TaN4	3.341	1.80596	0.96438	2.56265	2.80748	4.01194e+20	1.76382	0.985083	2.39592	1.56801	-1.01386e+20	1.80589	0.964741	2.56106
mp-9960	Y3TlC	0	0.19004	0.241187	0.699417	2.49434	2.09356e+21	1.84764	1.03252	2.39376	0.283348	-7.09519e+20	1.31644	0.836843	1.97304
mp-1878	HfBe13	0	0.00777026	0.00798097	0.960661	4.00775	1.84458e+22	5.96393	3.33319	2.39336	0.105215	-1.82741e+22	6.06861	3.49476	2.28827
mp-1848	Te2Ru	0.114696	0.295677	0.382979	0.678366	3.25052	8.50025e+21	3.75162	2.097	2.39294	0.179379	-8.13197e+19	0.27636	0.36033	0.67168
mp-447	TmAu	0	0.020799	0.0045502	9.7728	7.12572	4.64054e+22	14.8784	8.32008	2.39134	0.187595	-4.59994e+22	15.6523	9.3463	2.16725
mp-14172	SrSi2	0	0.124918	0.0936287	1.54108	5.19091	1.80117e+22	7.9727	4.49143	2.365	0.192303	-1.77478e+22	8.08968	4.65994	2.28732
mp-6231	Ba2ErSbO6	3.3733	0.424801	0.44822	0.922658	1.9592	1.00057e+21	1.14676	0.646342	2.36329	0.546627	-2.05319e+19	0.390349	0.416523	0.907239
mp-496	SrSi2	0	0.125201	0.0936886	1.54484	5.19113	1.80078e+22	7.97864	4.4977	2.3627	0.19221	-1.77439e+22	8.0933	4.66657	2.28398
mp-30861	PuZn2	0	0.0333263	0.0265671	1.40496	3.24307	1.42773e+22	4.43619	2.50145	2.36172	0.0817847	-1.35368e+22	4.3428	2.45255	2.35629
mp-11245	HoAu	0	0.0266808	0.00482728	12.9941	6.13625	4.57461e+22	12.6236	7.11832	2.3616	0.14381	-4.51244e+22	13.3269	8.1594	2.0874
mp-1418	FeNi3	0	0.0239241	0.0053303	9.50879	2.65919	9.98378e+22	6.81828	3.84594	2.36053	0.015066	-9.82013e+22	6.81163	3.91251	2.29717
mp-833	CaPd2	0	0.0385528	0.0103511	7.18795	3.37815	4.48789e+22	6.68762	3.7737	2.35915	0.0416231	-4.48789e+22	6.68762	3.7737	2.35915
mp-11151	NaPrTe2	1.05939	0.838793	0.523598	2.02761	2.07339	7.56616e+20	1.14166	0.64429	2.35877	1.01072	-3.72998e+19	0.799019	0.503416	1.99961
mp-226	FeS2	0.456702	0.421332	0.52097	0.727307	4.5121	1.59583e+22	6.57433	3.71044	2.35852	0.515696	-2.3802e+19	0.39569	0.45786	0.803404
mp-2807	ScP	0	0.0223532	0.015242	1.77602	0.914162	8.57891e+21	1.03549	0.585667	2.35096	0.00958542	-5.88836e+21	0.835163	0.497673	2.1739
mp-756361	ZrSeO	1.95721	3.40778	1.72192	2.78412	3.77237	9.33278e+20	3.36276	1.9036	2.3479	2.04678	-2.17332e+20	3.40817	1.75249	2.71206
mp-21148	PrInCu2	0	0.0194442	0.00748675	4.18547	0.798525	7.92866e+21	0.881802	0.499403	2.34628	0.00730287	-7.6778e+21	0.867804	0.492767	2.33706
mp-10748	TaCu3S4	1.9547	2.99888	1.53472	2.73145	3.43786	6.68715e+20	2.87119	1.62635	2.34569	1.98149	-1.97764e+20	2.97936	1.54979	2.66548
mp-567628	Rb2LiDyBr6	4.186	4.78356	2.42826	2.76493	4.18062	1.18262e+21	4.52214	2.56337	2.34314	2.37677	-3.62003e+20	4.74236	2.44115	2.70769
mp-30479	Ca3Pb	0	0.00454808	0.0726897	0.0156507	1.32207	3.80479e+21	1.15504	0.656307	2.33473	0.0541659	-8.41319e+20	0.56756	0.404293	1.66331
mp-11229	YAl	0	0.0335232	0.00987957	6.25045	2.69583	5.00897e+22	5.54877	3.15334	2.3342	0.0244555	-4.95657e+22	5.54641	3.17699	2.30672
mp-761307	TiV2O7	2.0316	2.16619	1.16988	2.5196	3.19333	7.11048e+20	2.30689	1.31208	2.33132	1.59798	-1.21266e+20	2.17286	1.17579	2.5122
mp-30530	TlClO4	4.5806	2.06463	0.875616	3.62071	10.0941	1.91083e+22	23.9358	13.6291	2.3274	1.83087	-1.004e+20	2.06464	0.8759	3.61897
mp-2442	ErAu	0	0.0248626	0.0047163	12.1037	6.59804	4.59612e+22	13.882	7.91252	2.32384	0.166508	-4.55448e+22	14.5227	8.81515	2.11459
mp-755988	Hf3N4	0.930194	0.62617	0.356232	2.33044	1.66788	1.15351e+20	0.627957	0.358585	2.31743	1.00967	-2.71895e+19	0.604168	0.342328	2.34462
mp-23241	YBi	0	0.0315285	0.0216381	1.75884	0.941512	6.19012e+21	0.966985	0.552415	2.31596	0.0134047	-2.63106e+21	0.58008	0.365038	2.0032
mp-14760	LuAl3(PbO4)2	2.98469	1.61699	0.867696	2.54397	2.65162	3.72611e+20	1.63615	0.935124	2.31435	1.50713	-8.65065e+19	1.61563	0.86462	2.55431
mp-1490	AlAu4	0	0.0139439	0.012743	1.14464	2.33161	1.57847e+22	3.30502	1.89212	2.30855	0.0404805	-1.57134e+22	3.31462	1.9062	2.29296
mp-21202	Sm3In	0	0.0207902	0.011209	2.52603	2.54983	1.06961e+22	3.19671	1.8302	2.30837	0.0625711	1.08737e+22	3.25542	1.88858	2.26312
mp-555393	KBi6BrO9	2.3298	0.904003	0.505244	2.39333	1.95783	1.49153e+20	0.898612	0.51474	2.30662	1.24773	-4.48944e+19	0.904152	0.494333	2.47362
mp-559482	Ti2Bi2O7	2.6238	5.71882	2.83245	2.8689	4.90327	2.04304e+21	5.98101	3.43643	2.29615	2.44616	-4.25896e+20	5.79124	2.94534	2.75711
mp-2469	CdS	1.0461	0.172988	0.23534	0.630206	1.44336	4.24641e+21	1.32656	0.763434	2.29051	0.3398	-5.61943e+18	0.135453	0.158225	0.792089
mp-5621	NbCu3S4	1.69049	2.83255	1.51376	2.55963	3.41024	7.55304e+20	2.79781	1.61023	2.29031	1.82329	-1.7464e+20	2.8304	1.52472	2.52922
mp-560790	Cs2NaBiF6	5.0369	5.67563	2.98335	2.62401	4.42219	1.48199e+21	4.92604	2.83538	2.28997	2.38134	-3.98493e+20	5.51638	2.94919	2.55816
mp-8888	HoAl3(PbO4)2	2.9941	1.67933	0.904128	2.53139	2.67247	3.81825e+20	1.69438	0.975338	2.28973	1.52985	-9.1492e+19	1.67854	0.902233	2.53758
mp-317	SnRh	0	0.127582	0.0422358	5.25005	5.90883	3.03307e+22	11.0125	6.34915	2.2843	0.179889	-3.02227e+22	11.1242	6.49166	2.24321
mp-557515	CrBiO3	1.83969	2.39409	1.36	2.33562	2.95876	6.14543e+20	2.4596	1.41815	2.28409	1.57187	-1.44409e+20	2.42838	1.33307	2.45864
mp-23644	Hg3AsClO4	2.05411	3.38394	1.78171	2.61745	3.56923	8.1759e+20	3.15164	1.81718	2.28407	2.00225	-2.16531e+20	3.34207	1.78314	2.56593
mp-3466	PrAlO3	4.1342	1.41139	0.834681	2.19882	2.30053	3.6433e+20	1.39565	0.805216	2.2819	1.309	-7.11218e+19	1.45796	0.819787	2.37174
mp-22922	AgCl	0.953895	0.285598	0.308493	0.890767	1.06971	4.3225e+21	0.987542	0.570285	2.27874	0.488705	-1.28777e+19	0.274067	0.288289	0.926925
mp-581934	Pu3Ge	0	0.107197	0.0274354	7.72336	4.22386	2.59869e+22	7.27378	4.20515	2.27493	0.100385	-2.40335e+22	7.05094	4.10625	2.2501
mp-33018	Rb3Sb	0.434103	0.16546	0.231428	0.604527	1.57885	1.93094e+21	1.13903	0.660781	2.26316	0.306075	-5.357e+18	0.116507	0.139985	0.759292
mp-557071	KBi6ClO9	2.3531	0.928478	0.524794	2.35328	1.95134	1.5098e+20	0.921585	0.535091	2.26028	1.25798	-4.69632e+19	0.930016	0.513915	2.43444
mp-19764	Pr3In	0	0.00725601	0.00984075	0.633147	2.24602	2.99811e+22	3.98471	2.31571	2.2572	0.033681	-1.73785e+22	3.25389	2.2083	1.78862
mp-21360	NdInCu2	0	0.022008	0.00703933	5.52806	0.756058	8.34459e+21	0.871443	0.506517	2.25667	0.00667151	-8.02882e+21	0.854419	0.498364	2.24485
mp-21567	SmAl3(PbO4)2	2.99069	1.76567	0.955902	2.5104	2.69243	3.89541e+20	1.77204	1.03058	2.25468	1.56202	-9.87853e+19	1.76558	0.955862	2.51037
mp-11532	Zn11Ni2	0	0.0206074	0.00773033	4.35248	1.5836	2.61919e+22	2.68221	1.56167	2.25089	0.0155857	-3.09532e+21	0.692573	0.212311	5.89168
mp-28110	Rb2PtI6	0.547003	0.873159	0.496662	2.33104	1.8998	1.44728e+20	0.871866	0.507644	2.25079	1.19169	-4.18483e+19	0.872783	0.483121	2.42815
mp-13675	CdPd3O4	0	0.0223687	0.0839117	0.137634	2.39167	2.54375e+21	1.95144	1.13626	2.2507	0.153786	-2.28889e+21	1.8954	1.12158	2.19687
mp-21483	Nd3In	0	0.00114239	0.0103314	0.0367691	2.36098	3.07379e+22	4.23552	2.46679	2.24989	0.036219	-1.77587e+22	3.40011	2.27954	1.82166
mp-557257	KVF3	2.08379	0.364522	0.582634	0.494871	2.58605	7.16744e+21	2.91002	1.69486	2.24979	0.374809	-2.15158e+19	0.342473	0.559702	0.478636
mp-21845	FePd3	0	0.0487825	0.00704818	18.2088	2.2542	8.06432e+22	5.55743	3.23797	2.24855	0.0132355	-8.00586e+22	5.56738	3.27668	2.21475
mp-23465	Cs2TeCl6	2.7991	2.01438	1.06437	2.6036	2.77395	3.87632e+20	1.96721	1.14676	2.24681	1.73988	-1.22703e+20	2.01119	1.07089	2.57371
mp-754381	Zr3N4	0.569398	0.569175	0.335971	2.20503	1.5447	8.46525e+19	0.569725	0.332311	2.24482	1.02008	-2.39369e+19	0.568763	0.316753	2.40612
mp-19410	ZnCr2O4	2.6233	1.68971	0.936142	2.42497	2.66044	4.31934e+20	1.69632	0.990862	2.23997	1.47686	-9.5193e+19	1.68963	0.935672	2.42661
mp-21618	NdAl3(PbO4)2	2.9857	1.80597	0.981454	2.4961	2.69575	3.94255e+20	1.80695	1.05793	2.23222	1.57656	-1.02315e+20	1.8061	0.982344	2.49297
mp-1922	RuSe2	0.312196	0.363124	0.433878	0.765651	2.60392	6.22646e+21	2.83233	1.66417	2.22035	0.417083	-3.03508e+19	0.326391	0.381865	0.790209
mp-1718	ZrFe2	0	0.0457176	0.0269475	2.20977	4.69094	3.39752e+22	9.0019	5.29108	2.21914	0.10882	-3.35615e+22	9.01036	5.32883	2.19869
mp-19881	Dy3InC	0	0.113438	0.163819	0.576226	2.05149	2.75194e+21	1.70554	1.00288	2.21778	0.206294	-8.64983e+20	1.22878	0.773223	2.00335
mp-19202	MgCr2O4	2.8537	1.81303	1.00605	2.41923	2.74088	4.77381e+20	1.83397	1.07998	2.21291	1.51033	-1.02693e+20	1.81324	1.00687	2.41669
mp-1236	NdAg	0	0.0205436	0.00565192	6.92979	2.58829	6.99052e+22	6.16644	3.63491	2.20959	0.0275519	-4.22323e+22	5.24081	4.09083	1.45004
mp-554769	MoSBr	0.793702	1.47372	0.825449	2.38554	2.42416	3.0726e+20	1.46548	0.864926	2.20548	1.42905	-8.0722e+19	1.47402	0.822088	2.40093
mp-14304	Lu2MgS4	1.98181	0.473811	0.539957	0.821995	1.7585	2.15511e+21	1.34626	0.794825	2.20439	0.568577	-2.50631e+19	0.455145	0.504195	0.857683
mp-30847	TiSnPt	0.797797	2.68001	1.15268	3.54518	7.4729	7.92518e+22	19.4872	11.5134	2.20199	1.81948	-1.35063e+20	2.71954	1.16902	3.54824
mp-542435	Li3ScN2	2.2441	1.20204	0.734055	2.0955	2.28174	4.90374e+20	1.28193	0.757422	2.20186	1.18354	-6.1815e+19	1.19307	0.732248	2.07977
mp-27691	K2PtBr6	1.2017	1.14321	0.647282	2.34718	2.12998	2.07682e+20	1.13661	0.671705	2.20115	1.31801	-5.88154e+19	1.14662	0.639158	2.40279
mp-23	Ni	0	0.0488577	0.00342574	53.8601	1.30115	5.53841e+22	2.86575	1.69407	2.2002	0.00587102	-5.34804e+22	2.83731	1.70509	2.14654
mp-634984	Mg5(Si8Pd5)2	0	0.188929	0.0805805	3.59007	1.59803	8.66886e+20	0.921823	0.545197	2.19857	0.140206	-8.66886e+20	0.921823	0.545197	2.19857
mp-31149	Ca3BiN	0.373299	0.580703	0.343209	2.20087	1.54822	1.01479e+20	0.58082	0.343545	2.1983	0.966233	-2.82752e+19	0.580577	0.339723	2.2341
mp-29008	Li6MgBr8	4.68479	0.353239	0.388799	0.865996	1.59463	4.38313e+21	1.52693	0.903242	2.19797	0.529229	-1.73621e+19	0.343397	0.364778	0.913378
mp-2604	MgTe2	1.1162	2.03678	1.07776	2.59796	2.76246	3.754e+20	2.09173	1.2381	2.19598	1.76241	-1.26786e+20	2.04761	1.09428	2.55963
mp-764227	Ca3MnO4	2.84211	1.03974	0.630466	2.11785	2.00729	2.54699e+20	1.05316	0.624207	2.19154	1.13827	-5.01181e+19	1.04239	0.614895	2.20723
mp-11254	NdAu	0	0.00739103	0.0045128	2.09599	2.65222	4.47674e+22	5.49268	3.25745	2.18957	0.0279088	-4.45926e+22	5.49805	3.27665	2.17355
mp-22925	AgI	1.36779	0.224695	0.283174	0.70682	1.45087	3.16421e+21	1.25521	0.747367	2.17657	0.407379	-8.51631e+18	0.196345	0.221231	0.836102
mp-27830	Cs2SeCl6	2.7708	1.9987	1.08296	2.50728	2.69026	3.70981e+20	1.94938	1.16122	2.17506	1.715	-1.26911e+20	1.99434	1.09068	2.47259
mp-2498	PrOs2	0	0.150165	0.0090998	67.0352	4.27058	4.08332e+22	8.75326	5.21588	2.17402	0.0796745	-4.05654e+22	8.83771	5.35454	2.12044
mp-1050	Ni3S4	0	0.0105658	0.0155941	0.557717	2.6806	2.32794e+22	4.50804	2.68657	2.17362	0.045925	-2.29449e+22	4.49426	2.68265	2.16841
mp-552729	KIO3	2.5682	0.966514	0.58758	2.10966	1.98726	3.42529e+20	1.03146	0.616169	2.16586	1.10682	-4.68176e+19	0.959811	0.576687	2.14718
mp-1050	Ni3S4	0	0.0105375	0.0159944	0.534757	2.70186	2.30853e+22	4.5448	2.71567	2.16499	0.0471369	-2.27523e+22	4.52975	2.71196	2.15867
mp-13434	CaMgNi4	0	0.039358	0.0117209	6.15331	3.44314	5.43361e+22	7.70419	4.60864	2.16138	0.0425668	-5.43361e+22	7.70419	4.60864	2.16138
mp-754211	SrLa2O4	3.788	0.839312	0.647209	1.47679	2.34706	9.03833e+20	1.51436	0.907904	2.15418	0.756601	-4.26469e+19	0.729075	0.608151	1.31262
mp-22605	Cr2CdSe4	0.333095	0.841606	0.497001	2.20358	1.93133	2.19029e+20	0.927134	0.556007	2.15324	0.968751	-5.07401e+19	0.76174	0.458832	2.1391
mp-6692	Ba2PrSbO6	3.7661	1.02958	0.494643	3.00298	3.13677	2.08022e+22	5.37729	3.22606	2.15197	1.18312	-4.90374e+19	0.962655	0.48301	2.81366
mp-560037	Rb2NaBiF6	4.93889	3.78478	1.97411	2.65462	3.53281	8.04452e+20	3.55901	2.13542	2.15164	2.23895	-2.83074e+20	3.73034	2.01595	2.51712
mp-10108	NpP	0	0.158856	0.0254068	15.6343	5.51448	6.84497e+22	13.5987	8.16233	2.15042	0.0968347	-6.84497e+22	13.5987	8.16233	2.15042
mp-25053	Sr2NiMoO6	2.0882	5.17567	2.87551	2.41478	4.57717	2.07834e+21	5.49095	3.29882	2.1475	2.10364	-3.86191e+20	5.25967	2.94231	2.39004
mp-552	Th3Sb4	0.0446947	0.227808	0.339707	0.549159	2.67269	2.99169e+21	2.40808	1.44783	2.14503	0.203925	-2.10879e+21	2.09264	1.31249	2.01324
mp-21893	MnTe2	0	0.0634811	0.0223851	4.7756	0.940167	1.4665e+21	0.6345	0.382409	2.13725	0.0350543	1.4665e+21	0.6345	0.382409	2.13725
mp-27272	Ca3PI3	2.1548	1.35949	0.800848	2.21177	2.3212	3.11679e+20	1.37731	0.830133	2.13711	1.31702	-7.65728e+19	1.35319	0.7975	2.21024
mp-1138	LiF	8.7164	0.872519	0.902568	0.950479	1.6081	1.88457e+22	2.53176	1.52689	2.13511	0.763911	-5.46182e+19	0.872461	0.897883	0.957833
mp-761390	TaFeO4	1.8928	3.51476	2.21533	1.99841	3.03627	7.74115e+20	3.74318	2.2577	2.13482	1.8072	-2.45493e+20	3.66031	2.02586	2.42864
mp-644264	Ca4Mg4Fe3H22	1.4456	1.00236	0.948846	1.08578	2.5001	2.04997e+21	2.0177	1.2183	2.13134	0.802837	-6.09687e+19	0.984554	0.943941	1.06523
mp-14292	Ba2NdSbO6	3.6617	0.85346	0.474032	2.41581	2.7523	2.11346e+22	4.5579	2.75643	2.12631	0.883741	-4.33649e+19	0.728253	0.456149	2.01726
mp-738	Sb2Au	0	0.0119846	0.00746792	2.033	2.30611	1.32469e+22	3.26713	1.97641	2.12537	0.0485047	-1.32469e+22	3.26713	1.97641	2.12537
mp-22382	TbInAg2	0	0.0191003	0.00580737	5.96471	0.679283	9.50192e+21	0.850796	0.514783	2.12472	0.00535929	-9.25213e+21	0.840247	0.509382	2.11858
mp-2749	TiBe2	0	0.0317826	0.0143026	3.31255	1.75938	1.19454e+22	2.39572	1.44982	2.12413	0.0313735	-1.19454e+22	2.39572	1.44982	2.12413
mp-11222	Sm3Al	0	0.011105	0.00961962	1.24033	3.05183	2.04755e+22	5.03079	3.0476	2.12088	0.0641706	-2.04755e+22	5.03079	3.0476	2.12088
mp-10601	Y3GaC	0	0.119668	0.175874	0.561261	2.00111	2.73382e+21	1.71631	1.04262	2.11205	0.201459	-8.36678e+20	1.18988	0.799219	1.81658
mp-16992	NaAg3S2	0.928697	0.266343	0.32665	0.736272	1.60052	3.4685e+21	1.46522	0.892604	2.10314	0.443513	-1.12167e+19	0.243523	0.273476	0.840293
mp-22913	CuBr	0.4859	0.212256	0.27835	0.665891	1.27443	5.26904e+21	1.32941	0.810231	2.10172	0.366647	-7.98024e+18	0.169078	0.199206	0.781946
mp-10159	K3Sb	0.677305	0.171198	0.239984	0.602526	1.33542	1.16054e+21	0.857279	0.522855	2.09948	0.32983	-5.18418e+18	0.128041	0.151144	0.779714
mp-20696	Fe3W3C	0	0.119237	0.0419803	4.78685	0.743884	5.07654e+20	0.35799	0.218421	2.09829	0.0438412	1.6288e+20	0.166451	0.0691109	3.73775
mp-1232	Mo3Pt	0	0.0232359	0.0101593	3.45897	3.00955	6.68254e+22	7.33714	4.48043	2.09561	0.02967	-6.64901e+22	7.34408	4.50281	2.08296
mp-830	GaN	1.5701	0.187792	0.237453	0.703316	1.12425	3.95029e+21	1.06802	0.652809	2.09262	0.372226	-6.79286e+18	0.1576	0.177532	0.836407
mp-21475	SmInCu2	0	0.0238312	0.00637561	7.22665	0.6759	9.15827e+21	0.84591	0.517723	2.08853	0.00557941	-8.70855e+21	0.824477	0.506487	2.0769
mp-19817	Y3InC	0	0.160686	0.189645	0.779931	1.99509	2.9578e+21	1.7674	1.08206	2.08747	0.20451	-7.42571e+20	1.11048	0.769364	1.73407
mp-10606	Sm3TlC	0	0.0303043	0.0559863	0.398231	1.75629	2.66132e+21	1.4933	0.914679	2.08603	0.0847714	-2.38551e+21	1.42683	0.877683	2.07277
mp-9040	Ca3AuN	0	0.0337674	0.012791	4.28932	0.198433	4.35365e+20	0.0900009	0.0551341	2.08564	0.00359356	-3.20365e+20	0.0734513	0.0407127	2.42328
mp-10607	Lu3TlC	0	0.17545	0.126029	1.64258	1.73456	3.73021e+21	1.64237	1.00744	2.08152	0.105996	-4.30067e+20	0.535922	0.400051	1.55053
mp-570632	ScBi	0	0.0238939	0.0185463	1.46233	5.80197	1.12959e+23	17.2184	10.5833	2.07519	0.0672245	-1.12959e+23	17.2184	10.5833	2.07519
mp-13486	LaCoCu12	0	0.0311455	0.0274094	1.21128	1.52133	4.2069e+21	1.49564	0.920694	2.07047	0.0471509	-4.2069e+21	1.49564	0.920694	2.07047
mp-17250	K3SbO3	3.2396	3.33413	1.88497	2.35244	3.31842	7.87857e+20	3.13221	1.9291	2.06893	1.9253	-2.23539e+20	3.3002	1.88917	2.3089
mp-568719	SmInAg2	0	0.02343	0.00635317	7.08229	0.667439	8.5736e+21	0.822898	0.507156	2.06684	0.00575907	-8.21427e+21	0.805532	0.498139	2.05636
mp-871	FeSi	0.167296	0.0913538	0.203617	0.300517	5.15148	5.12541e+21	6.99354	4.31458	2.06366	0.639957	-5.12541e+21	6.99354	4.31458	2.06366
mp-11358	TaCo3	0	0.0215742	0.0073759	5.00239	3.65658	5.17005e+22	8.33235	5.14493	2.06102	0.0547787	-5.01917e+22	8.32854	5.26303	1.99067
mp-2525	PrAg	0	0.0178812	0.00555522	5.77488	2.23608	6.88202e+22	5.55583	3.43646	2.05568	0.0215882	-4.07532e+22	4.52854	3.59536	1.41359
mp-580589	Cs2NaErCl6	5.3478	4.51929	2.4742	2.46861	3.89058	1.25083e+21	4.43383	2.74713	2.05045	2.18073	-3.53605e+20	4.51055	2.53471	2.37384
mp-23270	Th3Bi4	0.0994032	0.341401	0.444917	0.672171	2.81598	2.14235e+21	2.44434	1.51492	2.04954	0.316715	-1.43987e+21	2.10759	1.3535	1.94308
mp-11261	YAu	0	0.0300716	0.00513872	14.1564	5.65445	4.47317e+22	12.7245	7.88932	2.04834	0.144709	-4.4354e+22	13.1577	8.54566	1.91053
mp-643071	Yb4Mg4Fe3H22	1.4719	0.936594	0.945431	0.986012	2.38084	2.58015e+21	2.09804	1.30307	2.04301	0.773028	-5.95528e+19	0.928276	0.938862	0.983135
mp-23060	Cs2PtI6	0.648406	0.95661	0.572704	2.15877	1.86498	1.65593e+20	0.956987	0.594407	2.04283	1.2063	-4.66477e+19	0.956083	0.556061	2.25455
mp-30728	HoIn	0	0.0260312	0.0077824	6.11748	2.02202	4.41528e+22	4.36578	2.71937	2.03419	0.0179553	-4.37395e+22	4.36743	2.73592	2.0169
mp-5376	Y4Ga12Pd	0	0.0467307	0.0136924	6.30496	0.852094	6.59e+21	0.974713	0.607506	2.03231	0.0137188	-2.31838e+21	0.542103	0.280021	2.69362
mp-23295	RbCl	4.8393	0.452519	0.477991	0.921142	1.18583	4.9336e+21	1.23839	0.772696	2.02897	0.598935	-2.44133e+19	0.450916	0.465979	0.951905
mp-867339	CsK2Bi	0.302699	0.144762	0.234869	0.483888	1.2508	1.03962e+21	0.79236	0.494847	2.02618	0.230739	-5.15726e+18	0.0831146	0.107063	0.684001
mp-23352	Ge(Bi3O5)4	2.3755	1.46608	0.866639	2.20029	2.22499	2.68044e+20	1.40506	0.878064	2.02421	1.40356	-8.19519e+19	1.47358	0.866294	2.21851
mp-5222	ReTeS	0.0889948	0.636327	0.430973	1.79409	1.71267	2.17173e+20	0.798394	0.498985	2.02392	0.527615	-1.49873e+20	0.74229	0.467992	1.99757
mp-23494	Ti(Bi3O5)4	2.31299	1.31142	0.784233	2.16245	2.13295	2.54156e+20	1.27015	0.794958	2.0196	1.32676	-6.96921e+19	1.3207	0.783379	2.18902
mp-1326	Nb3Sn	0	0.206138	0.0124559	67.3247	2.95995	1.9273e+22	4.94719	3.09751	2.01845	0.0721451	-1.83611e+22	5.00075	3.37199	1.80602
mp-565725	ZrV2O7	2.59261	2.1654	1.2654	2.23853	2.83607	6.14275e+20	2.23876	1.40284	2.01605	1.55148	-1.25268e+20	2.17007	1.27292	2.2259
mp-23492	Si(Bi3O5)4	2.3514	1.56908	0.922647	2.21776	2.29115	2.95226e+20	1.49891	0.939503	2.01519	1.44529	-8.94156e+19	1.57329	0.922252	2.22812
mp-25545	MnO2	1.6112	1.88247	1.09889	2.24215	2.57596	4.34058e+20	1.88862	1.18676	2.00758	1.51179	-1.08805e+20	1.88293	1.10148	2.23504
mp-551	BaAl2	0	0.0469824	0.00610433	21.3523	1.88073	1.85891e+22	3.08237	1.93883	2.00455	0.028019	-1.85891e+22	3.08237	1.93883	2.00455
mp-632250	H2	7.37501	5.82747	3.20154	2.45574	4.13667	1.48645e+21	5.38571	3.39031	2.00219	2.40214	-4.51076e+20	5.72538	3.25386	2.33403
mp-30445	ZrBe13	0	0.0159753	0.00824078	2.69912	2.64245	1.92853e+22	4.433	2.797	1.9953	0.0625055	-1.8083e+22	4.63814	3.38966	1.60059
mp-7575	LiZnN	0.508295	0.167166	0.246535	0.558346	1.21645	4.79279e+21	1.27514	0.805735	1.9909	0.29409	-4.27051e+18	0.107153	0.132548	0.726854
mp-6933	MnN	0	0.0741032	0.00691842	35.0546	2.70514	1.37423e+23	8.65909	5.48033	1.98609	0.0162699	-1.3371e+23	8.74277	5.91186	1.7984
mp-24227	H8Pt(NCl3)2	1.7978	1.56183	0.927178	2.18629	2.33023	3.31028e+20	1.56476	0.990476	1.98566	1.41281	-9.0945e+19	1.56122	0.924922	2.19299
mp-15802	Tm2MgSe4	1.4057	0.389048	0.465574	0.763873	1.54635	2.05055e+21	1.24839	0.792204	1.97821	0.516719	-1.9996e+19	0.36684	0.415568	0.829377
mp-28084	Rb2PdBr6	0.647903	1.24605	0.747292	2.15312	2.06683	2.31763e+20	1.23971	0.786928	1.97732	1.31571	-6.88065e+19	1.24692	0.73864	2.19335
mp-25545	MnO2	1.572	1.90121	1.11769	2.21853	2.56456	4.48275e+20	1.90704	1.21164	1.97458	1.51328	-1.12606e+20	1.90199	1.12138	2.20895
mp-30775	PrMg2	0	0.0359093	0.0122918	4.99326	6.50407	3.71023e+22	14.6552	9.32343	1.97071	0.243128	-3.71023e+22	14.6552	9.32343	1.97071
mp-45	Ca	0	0.00919	0.0092718	0.986795	0.694994	6.43288e+21	0.805559	0.513319	1.96592	0.00802542	-6.31139e+21	0.79745	0.506258	1.97696
mp-10191	Lu2MgSe4	1.4771	0.395518	0.469484	0.773246	1.54122	2.04354e+21	1.24852	0.795796	1.96512	0.516345	-1.94992e+19	0.36953	0.419789	0.825902
mp-10692	CoGe	0	0.0411059	0.0972105	0.27497	5.71083	4.34167e+22	13.1769	8.40892	1.9616	0.225907	-3.25749e+21	3.00301	1.46329	2.93996
mp-866617	Cs2Sr2(CO3)3	4.61281	2.52349	1.47266	2.24311	2.80412	5.19355e+20	2.42609	1.5487	1.96069	1.73139	-1.68242e+20	2.50703	1.48279	2.19846
mp-23513	K2PtCl6	1.8478	1.62133	0.964498	2.17949	2.33498	3.34277e+20	1.60883	1.02714	1.9603	1.43954	-9.02968e+19	1.62156	0.962274	2.18751
mp-29525	Rb3BiO3	3.1118	3.15502	1.81675	2.28855	3.10273	7.03323e+20	2.97547	1.90021	1.95943	1.90464	-2.26591e+20	3.12138	1.83178	2.22439
mp-4448	Y3AlC	0	0.142269	0.168083	0.778724	1.93351	1.10465e+21	1.34652	0.861033	1.95565	0.211591	-8.76276e+20	1.24493	0.803867	1.92727
mp-8578	Sc3InC	0	0.132039	0.189033	0.583775	2.27983	3.39503e+21	2.24147	1.43663	1.94885	0.205104	-1.20788e+21	1.5225	1.11024	1.60588
mp-3340	TaAlCo2	0	0.0388258	0.0120623	5.77477	2.14809	5.44649e+22	5.12394	3.28708	1.94622	0.0189904	-5.40863e+22	5.12911	3.31557	1.92409
mp-570379	Cs2LiLuCl6	5.33881	3.94342	2.27193	2.28674	3.65197	1.25208e+21	4.02511	2.58272	1.94559	1.94985	-2.9075e+20	3.96725	2.32618	2.22726
mp-10721	Ti2C	0	0.0667775	0.0236962	4.73072	3.33423	1.51965e+22	5.35967	3.44603	1.93967	0.108222	-1.51965e+22	5.35967	3.44603	1.93967
mp-10890	LiAl3	0	0.00626999	0.00181608	6.41499	0.52318	4.73824e+22	1.18902	0.764939	1.93795	0.00117825	-4.73824e+22	1.18902	0.764939	1.93795
mp-2983	Ba(PN2)2	3.9118	3.18815	1.80305	2.35122	3.19525	7.83052e+20	3.20935	2.06507	1.93742	1.92842	-2.2943e+20	3.20069	1.8556	2.26536
mp-850183	Li3FeO4	0.336401	2.42107	1.65589	1.76792	3.2199	8.87536e+20	3.12447	2.01169	1.93564	1.58333	-3.23783e+20	3.08547	1.88463	2.09481
mp-569823	YInAg2	0	0.0193011	0.00586672	5.96733	0.622128	9.64097e+21	0.833198	0.536504	1.93536	0.00503064	-9.44791e+21	0.825157	0.531992	1.93174
mp-1559	Mg3N2	1.50991	0.21267	0.262629	0.728696	1.05606	1.9316e+21	0.836857	0.539129	1.93392	0.394841	-7.88646e+18	0.181531	0.204284	0.837673
mp-23691	Tl(BH)6	4.54099	2.76245	1.58076	2.31016	3.09772	7.73109e+20	2.93077	1.89035	1.93046	1.76063	-1.85562e+20	2.78895	1.62198	2.25472
mp-18766	Si(NiO2)2	3.3855	3.22608	1.91188	2.19192	3.51617	1.43301e+21	3.58296	2.31113	1.93031	1.71653	-2.17005e+20	3.26067	1.94985	2.16251
mp-2052	ScAs	0	0.0235543	0.0161579	1.76006	0.772185	8.91862e+21	1.01123	0.652879	1.92763	0.00947328	-4.16602e+21	0.659959	0.437081	1.85538
mp-773455	V2SnO7	2.60539	3.70068	2.1504	2.25758	3.30789	8.66767e+20	3.49539	2.25807	1.92591	1.97962	-2.77406e+20	3.65833	2.17608	2.17977
mp-15803	Y2MgSe4	1.3007	0.400083	0.477677	0.766521	1.56331	2.02474e+21	1.28305	0.829477	1.9238	0.517334	-2.05721e+19	0.374729	0.42772	0.820043
mp-643397	H8Pd(NCl3)2	1.1199	1.5471	0.936737	2.12251	2.26777	3.22305e+20	1.55331	1.00502	1.92144	1.39459	-8.73268e+19	1.54605	0.933051	2.13294
mp-8577	Sc3GaC	0	0.147671	0.202059	0.624779	2.15982	3.5938e+21	2.17417	1.40891	1.91697	0.223258	-1.03548e+21	1.44858	1.0482	1.62459
mp-772487	LiCrO2	3.0611	3.23891	1.90741	2.21275	3.25362	9.3449e+20	3.24929	2.10961	1.91152	1.80404	-2.24383e+20	3.24397	1.93732	2.16678
mp-23453	Hg6Sb5Br7	0.948698	0.90118	0.582836	1.92264	1.64188	1.0361e+20	0.895345	0.581883	1.90867	1.2713	-5.03303e+19	0.981584	0.599418	2.09554
mp-557964	Li9S3N	2.4272	0.63819	0.414205	1.9125	1.4814	1.28752e+20	0.640674	0.416442	1.9082	0.93509	-2.83905e+19	0.629984	0.408983	1.91177
mp-14581	CsCu2F6	0	0.170009	0.0640999	4.31938	1.48799	1.34295e+21	1.07979	0.702819	1.90435	0.105948	-1.34295e+21	1.07979	0.702819	1.90435
mp-41219	BaLiPrTeO6	3.13819	0.66946	0.675522	0.986568	1.81672	1.02884e+21	1.25306	0.815929	1.90318	0.653297	-3.58622e+19	0.628665	0.651474	0.947945
mp-27834	Tl2PtCl6	1.7341	1.62317	0.983509	2.12021	2.28522	3.27293e+20	1.6122	1.05	1.90258	1.429	-9.45197e+19	1.62324	0.982232	2.12448
mp-24411	K2LiAlH6	2.4456	0.489231	0.52486	0.899925	1.40786	2.66938e+21	1.26777	0.828044	1.89444	0.604923	-2.65141e+19	0.481427	0.50656	0.926507
mp-2332	Ho2C3	0	0.0871684	0.0499013	2.30872	1.55801	3.21485e+21	1.49721	0.979172	1.89075	0.0695869	-2.95278e+21	1.44058	0.941071	1.89397
mp-2310	CdO2	1.2577	3.69939	2.2415	2.12025	3.12965	7.98081e+20	3.14648	2.0612	1.88607	1.85123	-2.47016e+20	3.58244	2.20436	2.07178
mp-11263	Zr3Au	0	0.000495734	0.00988214	0.0112356	2.92859	2.21659e+22	5.37056	3.52306	1.88213	0.0661211	-2.21659e+22	5.37056	3.52306	1.88213
mp-25013	Ba2MnMoO6	1.2722	1.87765	1.17541	2.01899	2.59376	6.67188e+20	2.0037	1.31464	1.88164	1.38495	-1.08257e+20	1.87931	1.17768	2.01584
mp-505679	HfV2O7	2.65029	2.35262	1.42523	2.12081	2.7773	6.18595e+20	2.39601	1.57244	1.88092	1.57981	-1.53326e+20	2.35906	1.44118	2.09426
mp-630372	Tb4Ga6FeGe6	0	0.0253222	0.00805199	5.57697	1.69434	1.61988e+22	2.76742	1.8167	1.88014	0.0275076	-1.60574e+22	2.76182	1.81818	1.87214
mp-11256	ScAu	0	0.0281247	0.00458554	15.1896	6.44386	5.63861e+22	16.8493	11.0661	1.8788	0.178744	-5.58189e+22	17.1503	11.529	1.81434
mp-580631	TbCs2KCl6	5.08779	0.944059	0.934104	1.01603	3.28137	1.53682e+21	3.21408	2.11179	1.87762	0.762088	-9.72271e+20	2.83475	1.87798	1.85455
mp-10250	BaLiF3	6.5643	0.980909	0.639647	1.89903	1.82177	2.45981e+20	0.991197	0.651641	1.87598	1.08702	-4.93752e+19	0.977533	0.635609	1.90727
mp-985	TmCu	0	0.0322451	0.00488477	16.9601	6.47471	5.21656e+22	16.6072	10.921	1.87521	0.200877	-5.19494e+22	17.1971	11.7687	1.76639
mp-12009	YbCdCu4	0	0.0435402	0.00553022	22.0913	2.34811	2.51035e+22	4.47499	2.95135	1.86706	0.0404617	-2.48046e+22	4.51248	3.05229	1.79757
mp-4338	Cr2CdS4	0.417994	0.405007	0.566044	0.605228	1.88372	6.28259e+20	1.18406	0.781468	1.86506	0.373021	-3.6425e+20	1.00377	0.713677	1.66801
mp-768232	Rb3SbO3	3.161	3.45523	2.03431	2.21355	3.05704	7.09287e+20	3.17881	2.09902	1.86368	1.97909	-2.62838e+20	3.38251	2.04838	2.12198
mp-2741	CaF2	7.1148	0.561853	0.585463	0.940125	1.73024	5.52782e+21	2.00895	1.32859	1.85937	0.647627	-3.28164e+19	0.558818	0.577154	0.952727
mp-23067	K2PdCl6	1.2004	1.65669	1.01978	2.07061	2.25991	3.41497e+20	1.64415	1.09506	1.83972	1.42838	-9.8342e+19	1.65672	1.01958	2.07131
mp-9027	TiS2	0	0.202492	0.233462	0.80777	2.00843	2.08472e+21	1.76761	1.18157	1.82974	0.209552	-9.32105e+20	1.28468	0.907923	1.68313
mp-2238	Dy2C3	0	0.0853144	0.0518779	2.10892	1.54151	3.26945e+21	1.5231	1.01818	1.82959	0.0707921	-2.91731e+21	1.44581	0.965798	1.83162
mp-9723	Sr4Li(BN2)3	2.0894	0.398638	0.438132	0.867881	1.76586	6.66304e+21	2.20342	1.47318	1.82921	0.55973	-2.04283e+19	0.395638	0.419208	0.916861
mp-11318	CePt3	0	0.286642	0.0513824	13.1761	7.30696	2.00554e+23	28.8295	19.3041	1.82508	0.107166	-1.9932e+23	29.592	20.6559	1.71472
mp-20300	EuP	0	0.00240024	0.0106055	0.107668	3.43974	3.33055e+22	7.40175	4.96352	1.82103	0.0713627	3.17772e+22	7.10403	4.65213	1.88703
mp-25	N2	7.3314	5.0876	3.07577	2.12735	3.90725	1.75678e+21	5.02757	3.37184	1.82069	2.04559	-3.86448e+20	5.08348	3.1265	2.07326
mp-10953	Sc2CdS4	0.958099	0.337385	0.428161	0.699484	1.67113	2.76333e+21	1.5793	1.05986	1.81897	0.460598	-1.50879e+19	0.299926	0.35572	0.774208
mp-281	YbCo2	0	0.0873056	0.0183124	10.4098	1.372	7.29869e+21	1.76351	1.18673	1.81151	0.0312352	-7.29869e+21	1.76351	1.18673	1.81151
mp-8331	Li12Mg3Si4	0	0.0372819	0.0636753	0.448013	1.0177	2.19697e+21	0.879278	0.592184	1.80927	0.0473592	-8.20359e+20	0.518582	0.357364	1.74808
mp-569066	Cs2PdI6	0.212099	0.771301	0.540234	1.70594	1.72838	2.25771e+20	0.938043	0.632339	1.8068	0.644856	-1.5669e+20	0.887724	0.594707	1.82374
mp-472	UAl2	0	0.0469185	0.0401189	1.26472	3.73814	1.56943e+22	6.46837	4.36211	1.80571	0.147766	-1.64432e+22	6.56897	4.45392	1.79115
mp-23193	KCl	5.027	0.469996	0.496958	0.919733	1.07767	6.14128e+21	1.30718	0.881755	1.80501	0.601057	-2.55144e+19	0.46442	0.48392	0.94017
mp-542951	Cs2NaHoCl6	5.2906	4.47712	2.65231	2.19312	3.57952	1.28146e+21	4.40405	2.97113	1.80467	2.07521	-3.6346e+20	4.47312	2.72491	2.10323
mp-555785	Nd2Ti2O7	2.74351	3.4311	2.26957	1.85881	3.90996	2.21872e+21	4.9348	3.35221	1.78611	1.60392	-2.9202e+20	3.68638	2.42031	1.87972
mp-2085	PrCo2	0	0.144778	0.0290472	11.1275	3.7213	4.87441e+22	9.20397	6.2585	1.78344	0.0934899	-4.89139e+21	2.36546	1.09914	3.15715
mp-417	MnRh	0	0.0410036	0.00402078	32.5663	2.2031	1.90115e+23	8.42927	5.73229	1.78317	0.00968294	-1.89643e+23	8.46301	5.8431	1.7431
mp-30062	Cs2PtBr6	1.4568	1.50279	0.946828	1.99959	2.08623	2.78209e+20	1.4789	1.00662	1.78079	1.38291	-9.2437e+19	1.50371	0.944709	2.00817
mp-559695	Cs2RbBiF6	4.7856	3.75181	2.26483	2.1321	3.08536	7.85129e+20	3.49939	2.38436	1.77799	1.97434	-2.85311e+20	3.68966	2.30069	2.03092
mp-2567	V3Si	0	0.183742	0.0126984	55.0414	3.29976	2.74012e+22	6.77662	4.61897	1.77706	0.0812458	-2.67493e+22	6.83513	4.81072	1.69358
mp-22903	RbI	3.77699	0.362957	0.402419	0.856576	1.12431	2.92894e+21	1.08243	0.737803	1.777	0.53377	-1.74287e+19	0.35407	0.377661	0.907778
mp-27851	Hg3(SeCl)2	1.77201	0.350931	0.403459	0.81121	1.6323	4.0755e+21	1.77028	1.2068	1.77669	0.510891	-1.74272e+19	0.334628	0.367496	0.868889
mp-752735	PdO2	0	0.0108723	0.0052548	2.97609	0.0496908	2.81536e+20	0.0216812	0.0147883	1.7752	0.000377427	-2.81536e+20	0.0216812	0.0147883	1.7752
mp-1695	Y2C3	0	0.0701254	0.0594727	1.28037	1.58646	3.14326e+21	1.58348	1.08016	1.77495	0.103242	-4.33807e+22	11.2015	36.7371	0.168367
mp-1221	V3Ge	0	0.166862	0.0131338	45.2845	3.30202	2.71171e+22	6.77345	4.62596	1.77179	0.0837633	-2.62468e+22	6.84482	4.85881	1.67205
mp-23350	Rb2PtCl6	1.93629	1.80003	1.13453	1.99846	2.26379	3.55643e+20	1.77402	1.21464	1.7651	1.45859	-1.07932e+20	1.79947	1.13725	1.99037
mp-14407	Rb7NaGe8	1.3385	2.23756	1.35516	2.12167	2.28509	3.05357e+20	2.06961	1.41974	1.76002	1.81863	-1.53901e+20	2.1936	1.37168	2.02234
mp-10811	NaSr4(BN2)3	1.9873	0.398035	0.436883	0.869629	1.54143	6.46153e+21	1.94759	1.33628	1.75955	0.551709	-2.08141e+19	0.38725	0.413175	0.907374
mp-605835	Nd4MgRu	0	0.197805	0.0874084	3.40429	0.965552	4.06613e+20	0.496784	0.340867	1.75944	0.112724	-5.70961e+20	0.614256	0.467867	1.50432
mp-4079	Sc3AlC	0	0.152484	0.159052	0.938698	1.90331	1.84353e+21	1.65435	1.13563	1.75827	0.192154	-1.06395e+21	1.34504	0.94608	1.69516
mp-22898	KI	3.8513	0.360523	0.396521	0.866963	1.17902	3.6282e+21	1.22984	0.845988	1.75277	0.536066	-1.78632e+19	0.352967	0.373849	0.917397
mp-778152	Sc2Pt2O7	1.8069	1.78827	1.16887	1.89236	2.28729	4.21837e+20	1.76663	1.21724	1.74844	1.35962	-1.05811e+20	1.78781	1.16997	1.88896
mp-7226	V3Ni	0	0.0958737	0.0204236	10.1707	4.72123	1.33045e+23	16.4836	11.36	1.74788	0.0605064	-1.31134e+23	16.6274	11.8331	1.66568
mp-600125	HfInCu2	0	0.0163605	0.00480636	6.28013	1.12411	1.50898e+22	1.87873	1.29707	1.74323	0.0135889	-1.50898e+22	1.87873	1.29707	1.74323
mp-559730	KGa(Te3O7)2	2.9729	1.92188	1.21458	1.99044	2.22898	3.19337e+20	1.82906	1.263	1.74276	1.57835	-1.32032e+20	1.90967	1.2214	1.95502
mp-754114	SrSc2O4	3.5108	1.54364	1.04231	1.80228	2.19089	4.73775e+20	1.58402	1.09417	1.74187	1.23547	-8.91335e+19	1.5422	1.04084	1.80357
mp-23276	InCl	2.1877	1.98346	1.24072	2.02127	2.20829	2.98201e+20	1.85419	1.28131	1.74081	1.6433	-1.34871e+20	1.96092	1.24732	1.97117
mp-1955	ErCu	0	0.0339273	0.00496269	17.875	5.88689	5.11326e+22	15.666	10.8298	1.73982	0.180081	-5.09951e+22	15.9961	11.3536	1.67233
mp-1911	CeSn3	0	0.0871821	0.00636246	50.7228	2.16979	1.41346e+23	7.6523	5.29183	1.73892	0.0119252	-1.41174e+23	7.66334	5.31832	1.72968
mp-22658	Co2NiS4	0	0.0694294	0.0223428	5.47782	7.95785	2.18505e+22	20.9987	14.5257	1.73812	0.911895	-2.13076e+22	24.2303	18.4381	1.50648
mp-801	Mo3Os	0	0.00486179	0.00662481	0.628687	1.65969	3.21411e+22	3.58118	2.47777	1.7376	0.0184006	-3.21411e+22	3.58118	2.47777	1.7376
mp-770092	HfP2O7	5.292	2.02451	1.28513	1.97724	2.38879	4.36351e+20	2.01963	1.39998	1.7327	1.50479	-1.31871e+20	2.02472	1.29611	1.95248
mp-1971	HoCu	0	0.0343064	0.00499983	17.9734	5.57395	5.05356e+22	14.7438	10.2401	1.72765	0.164591	-5.03291e+22	15.1701	10.9512	1.63039
mp-581857	KBiF4	3.2284	1.63538	1.07112	1.88656	2.19435	3.95174e+20	1.65066	1.14929	1.72123	1.32069	-9.77276e+19	1.6352	1.07084	1.887
mp-568516	K3Bi	0.131295	0.129627	0.221007	0.449192	1.04088	1.5128e+21	0.827006	0.576947	1.71616	0.129974	-8.15311e+18	0.0595408	0.0771772	0.677623
mp-615746	RbBiF4	2.8665	1.61859	1.06636	1.87003	2.1687	3.74443e+20	1.63155	1.13943	1.71344	1.31025	-9.90369e+19	1.61853	1.06642	1.86976
mp-3949	K7LiSi8	1.693	2.34049	1.43324	2.08681	2.29597	3.26978e+20	2.17193	1.5178	1.71178	1.87118	-1.70342e+20	2.28867	1.45878	1.96513
mp-7024	Tb2C3	0	0.0836337	0.0547079	1.89015	1.46985	3.22946e+21	1.51227	1.05698	1.71138	0.0705807	-2.96325e+21	1.45383	1.0152	1.71374
mp-574653	Cs2LiIr(CN)6	5.40341	5.65179	3.71576	1.87589	4.03778	2.12539e+21	5.95035	4.16828	1.7056	2.03323	-5.42994e+20	5.92206	3.895	1.87477
mp-570290	MnTlCl3	1.1484	2.99367	1.8709	2.0241	2.71671	6.1117e+20	2.79117	1.95822	1.70171	1.74935	-2.10935e+20	2.94818	1.88924	1.9494
mp-2334	DyCu	0	0.0347398	0.0050339	18.1294	5.0622	4.99641e+22	13.3393	9.35903	1.70158	0.138358	-4.97464e+22	13.6724	9.94011	1.61317
mp-1837	TbCu	0	0.0350556	0.00504613	18.3104	4.45164	4.9654e+22	11.5748	8.12387	1.7007	0.106885	-4.93327e+22	11.8677	8.69977	1.59326
mp-636287	Eu3(GaNi)4	0	0.0839308	0.0253951	6.00839	2.77997	1.68821e+22	5.01444	3.52386	1.69748	0.0860874	-1.61204e+22	4.99818	3.59894	1.63665
mp-6799	LiCa4(BN2)3	2.2125	0.432963	0.482473	0.850094	2.08283	7.07042e+21	2.81128	1.97573	1.69733	0.568169	-2.23604e+19	0.423329	0.455395	0.896261
mp-865120	NaPaO3	2.95731	2.89741	4.34522	0.5445	7.66367	3.41301e+22	20.6921	14.543	1.69717	0.925373	-3.2558e+20	2.91518	4.57335	0.508914
mp-154	N2	7.34271	5.15351	3.26835	1.97998	3.707	1.67213e+21	5.05192	3.55448	1.69442	2.01555	-4.26547e+20	5.13827	3.32567	1.92046
mp-28040	Hf(BH4)4	5.7442	4.55285	2.72109	2.16427	3.25451	9.85422e+20	4.27861	3.01358	1.69172	2.28466	-3.92683e+20	4.46921	2.81522	2.00022
mp-4697	Zn(CrSe2)2	0.0472934	0.442187	0.505878	0.817223	1.58935	4.65824e+20	0.965059	0.680722	1.68801	0.361933	-2.50987e+20	0.79004	0.598008	1.5185
mp-756935	Li3SbO3	2.9032	2.69248	1.73381	1.93521	2.65096	6.07713e+20	2.61343	1.84352	1.68789	1.6489	-1.99294e+20	2.67845	1.75367	1.88758
mp-573204	Cs2KBiF6	4.95459	4.28339	2.67152	2.03022	3.17566	9.59552e+20	3.95165	2.78892	1.68661	1.99479	-3.24319e+20	4.20253	2.7059	1.93552
mp-648	Na2S	2.4399	0.311484	0.351026	0.835883	1.03567	4.67435e+21	1.20371	0.850939	1.68242	0.499747	-1.42448e+19	0.299627	0.320523	0.90382
mp-29505	Cs3BiO3	3.06221	4.01507	2.46019	2.08491	2.94453	7.33311e+20	3.63981	2.58563	1.6702	2.19218	-3.40239e+20	3.87751	2.50702	1.9235
mp-567498	Rb2NaTmCl6	5.0573	0.412303	0.545922	0.65634	2.97947	2.82359e+21	3.3691	2.3942	1.66928	0.541024	-2.00351e+19	0.40094	0.453281	0.831893
mp-10602	Sm3GaC	0	0.00662803	0.0381506	0.0724143	1.24877	4.32833e+21	1.42854	1.01535	1.66885	0.0429151	-3.71613e+21	1.33044	0.955911	1.64197
mp-9765	Nd2Pt2O7	1.0846	1.72346	1.1603	1.81028	2.17191	4.03056e+20	1.69563	1.20701	1.66507	1.32179	-1.01453e+20	1.72335	1.16084	1.80884
mp-29398	Cs2HfI6	2.206	3.63531	2.24278	2.06363	2.86666	7.04988e+20	3.41357	2.43997	1.65476	2.02858	-2.86162e+20	3.56928	2.30205	1.93063
mp-16108	Cs3P6N11	4.0879	1.68234	1.16557	1.73405	2.26463	4.36324e+20	1.88972	1.35168	1.65305	1.29903	-1.41637e+20	1.73421	1.19568	1.74675
mp-1638	SrAl2	0	0.0400582	0.00505579	22.3025	1.50217	3.10577e+22	3.313	2.37113	1.65158	0.0168218	-3.10577e+22	3.313	2.37113	1.65158
mp-13356	Ba2SrTeO6	3.1297	0.493301	0.563063	0.820036	1.60478	1.44518e+21	1.40533	1.00635	1.65023	0.575915	-2.67068e+19	0.477962	0.515851	0.891873
mp-569782	Sr2LiCBr3N2	3.9744	0.386889	0.425957	0.865626	1.15008	9.34503e+20	0.811444	0.581365	1.64898	0.563673	-2.03033e+19	0.390108	0.408101	0.934601
mp-1266	Na2Se	2.0162	0.26047	0.304872	0.789696	0.989162	4.57455e+21	1.15697	0.829363	1.64766	0.456071	-1.08583e+19	0.243718	0.264763	0.883175
mp-28145	Rb2PdCl6	1.2844	1.86304	1.22489	1.8758	2.18403	3.57027e+20	1.83538	1.31662	1.64588	1.44724	-1.24785e+20	1.86112	1.23378	1.8527
mp-36248	H4BrN	4.05461	0.351379	0.385981	0.868589	0.961911	6.02224e+21	1.23379	0.886299	1.64245	0.530711	-1.6948e+19	0.343408	0.363333	0.918876
mp-12067	MnAl	0	0.0553364	0.00716839	21.4478	1.224	4.23265e+22	3.00393	2.1623	1.63743	0.00993564	-2.73743e+21	0.509446	0.189777	4.39828
mp-756148	Sm2Pt2O7	1.20659	1.77022	1.20451	1.78167	2.178	4.18796e+20	1.7484	1.25947	1.63561	1.3234	-1.04731e+20	1.76987	1.2056	1.77871
mp-12071	Ti3As	0	0.0479311	0.00962593	11.1112	3.87207	5.67012e+22	10.7186	7.7381	1.63026	0.0801357	-5.53242e+22	11.0241	8.56421	1.46045
mp-22344	Sn7Ru3	0	0.0124908	0.0205435	0.474105	1.41821	4.78113e+21	1.71254	1.23893	1.62514	0.12239	-1.51389e+22	5.92848	11.486	0.370819
mp-2184	As2O3	4.0085	3.03574	2.03565	1.82113	2.74694	7.55183e+20	2.9102	2.106	1.62442	1.63872	-2.21513e+20	3.01429	2.04767	1.78602
mp-22685	TbInCu2	0	0.0211383	0.00573811	7.07052	0.467853	1.02128e+22	0.718514	0.520667	1.62111	0.00346675	-9.88385e+21	0.705826	0.512024	1.61849
mp-754768	Tb2Pt2O7	1.39841	1.87936	1.28015	1.7788	2.22315	4.47687e+20	1.8525	1.34342	1.61927	1.35374	-1.19427e+20	1.87771	1.28374	1.76899
mp-567486	BaSr2(PN2)6	4.1542	2.08498	1.40986	1.79841	2.69588	9.70518e+20	2.65937	1.93167	1.61536	1.35181	-1.41512e+20	2.12878	1.44249	1.79277
mp-33948	Ho2Ti2O7	2.71659	3.88313	2.63061	1.79344	3.86485	2.53763e+21	5.55368	4.03841	1.61271	1.66902	-3.36279e+20	4.1891	2.83629	1.79496
mp-10675	Ti3AlN	0	0.173934	0.0297913	14.1073	2.83061	1.62187e+22	5.23635	3.80891	1.61192	0.0910358	-1.62187e+22	5.23635	3.80891	1.61192
mp-3335	Sm2Ti2O7	2.7423	3.31449	2.31539	1.71274	3.63643	2.25136e+21	4.88144	3.55169	1.61127	1.53133	-2.70486e+20	3.53614	2.4633	1.71996
mp-21084	In6Ga2PtO8	0.559303	0.163281	0.228798	0.602869	0.85708	1.10932e+21	0.639385	0.465215	1.61125	0.304413	-4.16023e+18	0.109168	0.130744	0.762978
mp-1768	LaOs2	0	0.108692	0.00934464	39.6693	3.53349	3.9698e+22	8.77227	6.38418	1.61068	0.0824503	-3.93828e+22	8.84735	6.54971	1.56995
mp-23560	Ge3(BiO3)4	3.4996	3.80506	2.38246	2.01838	2.78051	6.59934e+20	3.43635	2.50172	1.60987	2.15347	-3.16312e+20	3.66388	2.42542	1.85666
mp-756347	Y2Pt2O7	1.4655	1.92134	1.31304	1.77007	2.23188	4.48599e+20	1.8935	1.37897	1.60904	1.36225	-1.17813e+20	1.91973	1.31653	1.76081
mp-554941	KRb2BiF6	4.7982	5.14213	3.29786	1.947	3.24968	1.1157e+21	4.4547	3.24517	1.60832	2.17592	-4.16753e+20	4.93286	3.28097	1.84351
mp-22680	DyInCu2	0	0.0187522	0.00554907	6.21225	0.457997	1.06144e+22	0.71797	0.524308	1.60243	0.0032935	-1.02805e+22	0.706255	0.515804	1.6022
mp-570652	Hg6BiAs4Cl7	1.2956	1.25764	0.875953	1.72035	1.68567	1.61278e+20	1.18564	0.866849	1.5996	1.28343	-7.42292e+19	1.28881	0.880868	1.76977
mp-755635	Ho2Pt2O7	1.5085	1.9337	1.32284	1.76736	2.23745	4.73665e+20	1.90299	1.39169	1.59898	1.36421	-1.26792e+20	1.9313	1.32771	1.75438
mp-5889	Er2Ti2O7	2.7098	3.94117	2.54785	1.92387	3.67494	2.19588e+21	5.1003	3.7335	1.59668	1.74771	-3.14756e+20	4.11601	2.70074	1.88144
mp-756440	Er2Pt2O7	1.54991	1.98046	1.35617	1.76473	2.24911	4.70174e+20	1.94828	1.42878	1.59232	1.37727	-1.23016e+20	1.97821	1.36071	1.75292
mp-12911	Ba2LaRuO6	0.240603	1.1054	0.854559	1.47118	1.87838	3.62346e+20	1.37774	1.01169	1.58919	0.843212	-1.70797e+20	1.27904	0.930936	1.61045
mp-4155	Ca2Nb2O7	1.44209	1.49125	1.1313	1.51342	2.73484	1.93309e+21	2.91898	2.14559	1.58682	1.07685	-8.89063e+19	1.47922	1.12195	1.51387
mp-568670	TbCs2NaCl6	5.2045	4.56806	2.93668	1.94005	3.26684	1.2178e+21	4.46348	3.28531	1.5836	2.01598	-3.98758e+20	4.55117	3.0311	1.83986
mp-22867	RbBr	4.1927	0.40604	0.432502	0.909644	0.879242	4.62589e+21	1.05922	0.780128	1.58209	0.567538	-2.16306e+19	0.400931	0.418851	0.936516
mp-558585	Hg3PClO4	2.394	4.04793	2.64191	1.89659	2.98637	9.25758e+20	3.77092	2.78095	1.579	1.92677	-3.23381e+20	3.97232	2.67539	1.80919
mp-753414	Lu2Pt2O7	1.7029	2.08006	1.42996	1.7544	2.28268	4.91873e+20	2.04221	1.50706	1.57745	1.40024	-1.37654e+20	2.07623	1.43709	1.73656
mp-540838	Ni3B7IO13	2.37	2.48681	1.65408	1.84344	2.42428	5.35213e+20	2.39957	1.77383	1.57337	1.55469	-1.74146e+20	2.47141	1.67607	1.79053
mp-755026	La2Pt2O7	0.970793	1.96562	1.36769	1.72294	2.23732	4.92653e+20	1.94204	1.43587	1.57295	1.34981	-1.23036e+20	1.96432	1.37178	1.71352
mp-568917	LaInAg2	0	0.0187601	0.0076073	3.87262	1.5172	2.64347e+22	3.28047	2.4264	1.57203	0.0202535	-2.64347e+22	3.28047	2.4264	1.57203
mp-34322	Dy2Ti2O7	2.7262	3.60932	2.55825	1.6758	3.75831	2.48876e+21	5.4408	4.02986	1.56877	1.56533	-3.34441e+20	3.93974	2.78104	1.68613
mp-1921	ThTe	0	0.0127003	0.00778577	2.08337	0.586565	1.23958e+22	0.984025	0.729911	1.56532	0.00503461	-1.2163e+22	0.973165	0.719141	1.57419
mp-756646	SrLu2O4	3.5606	0.408249	0.452722	0.856329	1.08881	4.55492e+21	1.32396	0.985768	1.5565	0.56874	-2.21093e+19	0.408026	0.431365	0.919949
mp-4602	Tb2Ti2O7	2.7308	3.45991	2.47259	1.65527	3.69437	2.49575e+21	5.29352	3.94425	1.55478	1.52709	-2.89507e+20	3.72303	2.65356	1.66189
mp-757450	Sc2Ge2O7	3.6886	5.7216	3.5856	2.01574	3.49382	1.45874e+21	5.47972	4.08538	1.55342	2.2942	-5.29389e+20	5.65418	3.74153	1.85772
mp-3539	NbGaNi2	0	0.0215205	0.00996813	3.17217	5.1059	8.19244e+22	16.7159	12.47	1.55202	0.111404	-8.16291e+22	16.8555	12.6856	1.5316
mp-22040	Sn7Ir3	0	0.0958433	0.0636525	1.84765	1.42659	2.30674e+21	1.412	1.05346	1.55176	0.0891305	-2.30674e+21	1.412	1.05346	1.55176
mp-4922	MnAlNi2	0	0.0462417	0.0041984	36.5532	1.55542	9.33246e+22	5.15397	3.84825	1.54995	0.00925294	-9.30413e+22	5.15368	3.85774	1.5441
mp-757715	Tb(BiO2)3	2.6502	6.52404	4.28485	1.87876	3.59626	1.60264e+21	5.83844	4.36418	1.54736	2.25873	-5.82786e+20	6.31065	4.31117	1.771
mp-445	NdCo2	0	0.141146	0.0291477	10.656	3.15547	4.88542e+22	8.56375	6.40355	1.54655	0.0937622	-5.41019e+21	2.51841	1.18977	3.07961
mp-571341	InHg6As4Cl7	1.3829	1.29023	0.916481	1.67038	1.66876	1.68188e+20	1.21238	0.906725	1.54612	1.27347	-7.75316e+19	1.31671	0.92073	1.71016
mp-1649	Fe3Pt	0	0.0370065	0.00345755	35.0158	1.96448	1.60768e+23	7.84195	5.8825	1.53919	0.0103798	-1.60572e+23	7.85189	5.90926	1.53166
mp-541021	SbAsPd5	0	0.0288318	0.0298442	0.94955	1.98671	8.16736e+21	3.00225	2.25501	1.5362	0.0798511	-7.88784e+21	3.00986	2.32387	1.47401
mp-1525	CeTe	0	0.225679	0.021225	34.6709	9.72238	1.89675e+23	44.9304	33.8196	1.53129	0.267992	-1.87019e+23	46.9321	37.5287	1.39849
mp-969	YbAl2	0	0.0434509	0.0042377	32.8325	1.15962	2.79977e+22	2.596	1.95491	1.53028	0.0117004	-2.79071e+22	2.59531	1.96079	1.52278
mp-569335	Sm2C3	0	0.0778202	0.0616567	1.41797	1.4201	3.44928e+21	1.6122	1.21529	1.52796	0.0735853	-3.15465e+21	1.54873	1.16512	1.53252
mp-542	SrHg	0	0.0103097	0.00550686	2.56161	1.12079	3.89875e+22	2.8035	2.11407	1.52711	0.00894956	-3.89875e+22	2.8035	2.11407	1.52711
mp-6137	Mg4P6SN12	4.8355	0.50383	0.581813	0.805843	1.68952	2.80858e+21	1.83048	1.38694	1.51622	0.587689	-2.76879e+19	0.491479	0.546138	0.853695
mp-5373	Y2Ti2O7	2.721	3.60767	2.62175	1.61419	3.68838	2.59216e+21	5.49081	4.16972	1.5111	1.54099	-3.22821e+20	3.92096	2.8403	1.62197
mp-19946	YInCu2	0	0.0187655	0.00566332	6.0316	0.434783	1.02926e+22	0.701954	0.533382	1.50975	0.00326664	-1.0093e+22	0.694857	0.527974	1.50982
mp-10133	Sc3BPb	0	0.0802215	0.0712246	1.19534	1.48622	4.052e+21	1.79471	1.36381	1.5096	0.0862802	-2.43072e+21	1.47031	1.1385	1.46761
mp-1747	K2Te	2.1383	0.322522	0.35956	0.849536	1.01779	2.4808e+21	1.0357	0.7873	1.50884	0.506795	-1.53482e+19	0.310519	0.331988	0.904582
mp-557938	HfVF6	3.2222	1.7717	1.72973	1.03661	2.99621	1.29839e+21	3.68323	2.80248	1.50671	1.18791	-6.75289e+20	3.31659	2.49917	1.52878
mp-867341	CsAcTe2	0.909799	1.04014	0.411316	4.02136	6.09005	2.78742e+22	15.9612	12.1492	1.50584	1.44949	-3.81567e+19	0.999953	0.399276	3.96332
mp-8398	YbCsF3	7.0491	0.435584	0.461693	0.916384	0.910355	4.50411e+21	1.12525	0.857061	1.50438	0.585928	-2.31954e+19	0.431929	0.449169	0.942985
mp-567029	LaMn7O12	0	0.119523	0.026171	9.75996	2.60214	7.72748e+21	4.02074	3.06733	1.50079	0.151177	-7.66156e+21	4.0406	3.11326	1.47858
mp-567652	Cs2LiYCl6	4.8987	4.64986	3.07916	1.85572	3.17205	1.24038e+21	4.53009	3.45732	1.49986	2.01782	-4.0258e+20	4.62991	3.18076	1.75615
mp-5304	LaAlO3	3.4924	1.01988	0.752851	1.57673	1.58583	2.0423e+20	1.03074	0.787271	1.49809	1.04128	-5.68462e+19	1.01478	0.738937	1.60934
mp-24052	CaMgNiH4	1.86969	5.01952	3.26132	1.90943	3.24748	1.30701e+21	4.8235	3.6843	1.498	2.07806	-4.15814e+20	4.96881	3.37479	1.78652
mp-2288	PuSe	0	0.110064	0.0257208	8.85201	2.22233	2.02075e+22	4.58863	3.50793	1.49606	0.0608421	4.08182e+22	8.03581	17.8874	0.301109
mp-2186	NpAs	0	0.148452	0.0364886	8.2062	3.52311	6.1023e+22	10.578	8.10529	1.49091	0.0936514	-3.51209e+22	8.51206	7.11411	1.30879
mp-22961	Li2ZnCl4	4.1418	0.581809	0.482276	1.32503	1.22379	2.45464e+20	0.661958	0.507784	1.48843	0.664388	-2.89005e+19	0.514771	0.46524	1.16387
mp-755731	Ta2Pb2O7	1.6249	3.42841	2.42494	1.68108	3.14543	1.45293e+21	4.18441	3.20997	1.48833	1.6323	-3.2162e+20	3.63843	2.5921	1.663
mp-14037	NaTl2RhF6	1.7809	2.41565	1.65713	1.76001	2.32402	5.25019e+20	2.39199	1.83789	1.48477	1.54925	-1.78117e+20	2.41389	1.69063	1.7061
mp-21309	MgTe(PbO3)2	2.26929	0.484693	0.528894	0.877299	1.05972	2.13578e+21	1.04104	0.800458	1.48319	0.596653	-2.67188e+19	0.476656	0.509	0.906215
mp-8594	Ag7PSe6	0.441205	0.313908	0.429776	0.624223	1.21368	3.53546e+20	0.712898	0.548879	1.48022	0.277067	-5.34027e+18	0.126742	0.182557	0.57847
mp-126	Pt	0	0.0467916	0.00192617	119.732	0.456842	5.07376e+22	1.27285	0.981247	1.4774	0.00128302	-5.07376e+22	1.27285	0.981247	1.4774
mp-628606	Rb2PdI6	0	0.197922	0.223028	0.835991	1.13708	4.24467e+20	0.692206	0.53465	1.47316	0.182093	-3.90523e+20	0.671619	0.518854	1.47271
mp-3686	YbBRh3	0	0.0348041	0.00720356	10.62	2.66788	3.99143e+22	6.9876	5.40645	1.46935	0.0529361	-3.9221e+22	6.98112	5.45757	1.44674
mp-11554	ZrPt	0	0.0172215	0.00302255	13.6002	1.39495	1.00418e+23	4.91588	3.81117	1.46492	0.00768544	-1.00187e+23	4.91915	3.82146	1.46047
mp-23372	Sn2Bi2O7	2.712	0.851701	0.580412	1.77757	4.03866	1.49006e+22	8.23406	6.38552	1.46429	0.788734	-3.64785e+19	0.668413	0.49314	1.57802
mp-580234	Fe3RhN	0	0.0736713	0.00754826	30.4914	2.76319	1.16007e+23	10.2801	7.97473	1.4636	0.0282184	-1.16007e+23	10.2801	7.97473	1.4636
mp-568863	Eu2LiCBr3N2	0.798396	0.517879	0.495333	1.06905	1.24294	5.24902e+20	0.820722	0.637569	1.4605	0.456333	-2.87209e+19	0.37643	0.440428	0.79016
mp-760109	Bi2(SO4)3	4.21859	3.71949	2.63609	1.67604	2.55428	8.67928e+20	3.6408	2.83008	1.45914	1.75507	-3.09056e+20	3.7833	2.63407	1.72133
mp-22060	Nb3In	0	0.0514594	0.00995045	11.7607	2.78685	3.23397e+22	6.86744	5.33875	1.45892	0.0688586	-3.16479e+22	7.01845	5.78731	1.33551
mp-29043	Hg4Sb2I3	0.715197	0.516944	0.406798	1.43251	1.11616	1.26718e+20	0.52942	0.411683	1.45833	0.608755	-2.642e+19	0.427418	0.386284	1.16391
mp-569571	Nb3Sb2Te5	0.8429	1.52999	1.09618	1.64896	1.97727	3.53703e+20	1.75044	1.36551	1.45137	1.24245	-1.21394e+20	1.56071	1.12436	1.6354
mp-30764	LiPt2	0	0.0224537	0.00460889	10.7532	0.838883	4.34459e+22	2.24899	1.75509	1.45055	0.0047884	-4.34459e+22	2.24899	1.75509	1.45055
mp-22916	NaBr	4.0899	0.33818	0.367261	0.883609	0.876101	6.15594e+21	1.23001	0.960291	1.44964	0.522624	-1.60708e+19	0.329258	0.34772	0.921425
mp-90	Cr	0	0.00822723	0.00276386	5.13577	1.7559	2.67048e+23	8.64066	6.75402	1.44703	0.00641373	-2.65635e+23	8.62801	6.74922	1.44539
mp-14827	Li7NbN4	3.3329	2.3795	1.6685	1.70309	2.21994	4.65085e+20	2.30667	1.80403	1.44581	1.53933	-1.75855e+20	2.36553	1.6953	1.64826
mp-2	Pd	0	0.056326	0.00278943	90.7382	0.493348	3.37147e+22	1.2205	0.95719	1.43983	0.00206657	-3.24549e+22	1.20413	0.958053	1.40905
mp-23331	Si3(BiO3)4	3.8981	4.0768	2.72661	1.82829	2.68955	7.50132e+20	3.71895	2.91772	1.43902	2.10259	-3.56034e+20	3.93832	2.79836	1.6696
mp-10849	AsPdSe	0	0.066158	0.0126214	12.0008	2.20576	1.58266e+22	4.33448	3.40748	1.43468	0.0695543	-1.57186e+22	4.34638	3.43773	1.42162
mp-611517	Xe	6.2086	0.476749	0.497959	0.936796	1.01317	7.7384e+21	1.54958	1.22	1.43147	0.614966	-2.57234e+19	0.47802	0.490898	0.960909
mp-2146	KGe	0.910602	1.36375	1.00101	1.59017	1.60083	1.61635e+20	1.31936	1.04005	1.42877	1.383	-9.21027e+19	1.36934	0.996497	1.61085
mp-549	ScSb	0	0.0224829	0.016667	1.56673	0.572617	6.6826e+21	0.831988	0.656171	1.42774	0.00840986	-4.11975e+21	0.617615	0.482784	1.44693
mp-1800	Nd2C3	0	0.0744078	0.0671157	1.16733	1.40787	3.49724e+21	1.68411	1.32932	1.42597	0.0774156	-3.28259e+21	1.63441	1.28888	1.42798
mp-10139	Sc3SnB	0	0.097001	0.0604088	2.03476	1.28379	2.90416e+21	1.44264	1.13975	1.42404	0.0713307	-2.50466e+21	1.35759	1.07826	1.41276
mp-34337	H4NCl	4.9341	0.416899	0.446625	0.901844	0.884669	9.21803e+21	1.43717	1.13609	1.42281	0.570289	-2.19763e+19	0.409665	0.430214	0.929216
mp-4759	ZrTe3O8	3.6731	1.9223	1.37133	1.65966	1.98447	3.43018e+20	1.8839	1.48936	1.42261	1.44354	-1.34559e+20	1.918	1.38795	1.62448
mp-375	UO3	1.63759	21.5376	16.4534	1.49765	6.78254	1.95286e+22	20.0816	15.9153	1.41734	2.53675	-2.4078e+21	21.5329	16.5355	1.48604
mp-16497	ScAlCu2	0	0.0319127	0.00556077	13.7481	0.471653	1.22876e+22	0.842986	0.668362	1.41649	0.00370508	-1.22002e+22	0.839936	0.665859	1.41676
mp-562072	Cs3SbO3	3.1046	4.33378	2.9494	1.78115	2.72085	7.98854e+20	3.91083	3.10198	1.41561	2.11191	-3.97837e+20	4.1569	3.0119	1.62141
mp-754711	Nb2Pb2O7	0.939595	2.15716	1.65694	1.48546	2.82582	1.98584e+21	3.51398	2.79369	1.41069	1.22711	-1.49709e+20	2.2092	1.70072	1.48048
mp-29638	BiTePt	0	0.000405804	0.0110409	0.00704639	2.46123	1.46625e+22	4.81768	3.83872	1.40597	0.0919845	-1.45185e+22	4.85662	3.94064	1.3682
mp-21135	Pr3InO	0	0.0202087	0.00926681	3.22041	1.55564	3.14025e+22	3.84732	3.07173	1.40172	0.0217759	-3.14025e+22	3.84732	3.07173	1.40172
mp-558374	SiO2	5.5665	0.727287	0.616152	1.28241	1.27879	1.85535e+20	0.729621	0.584383	1.39508	0.743654	-4.41438e+19	0.694173	0.625426	1.16933
mp-683	Pr2C3	0	0.0679474	0.0706357	0.943459	1.42456	3.56894e+21	1.75223	1.41071	1.3843	0.0814497	-3.34224e+21	1.69977	1.36595	1.38813
mp-24046	NaAlH24(SO10)2	5.3109	0.678838	0.551913	1.36409	1.2126	1.21435e+20	0.668879	0.541576	1.37256	0.797598	-4.17647e+19	0.684377	0.578007	1.28838
mp-2301	NiP3	0	0.0909661	0.0211354	8.92903	1.40288	1.36409e+22	2.68635	2.18621	1.36209	0.0331094	-1.31135e+22	2.66792	2.23321	1.30576
mp-580541	Cs2NaSmCl6	5.0722	4.60437	3.25696	1.68088	2.90333	1.10403e+21	4.45574	3.62633	1.362	1.95389	-4.15995e+20	4.56698	3.37359	1.57509
mp-772336	MnNi(PO4)2	0.285298	1.49333	1.17725	1.42867	1.73304	2.78188e+20	1.61169	1.317	1.35377	1.11625	-1.38067e+20	1.58764	1.22435	1.47662
mp-6299	K2Mg2(SO4)3	5.5458	0.658813	0.587944	1.18615	1.19437	2.09033e+20	0.682927	0.558443	1.35236	0.67184	-3.82412e+19	0.607665	0.585051	1.05854
mp-15600	K2Ca2(SO4)3	5.5109	0.707765	0.613196	1.24004	1.21601	1.81815e+20	0.713926	0.583851	1.35215	0.722643	-4.29142e+19	0.677822	0.614888	1.15739
mp-15599	K2Ca2(SO4)3	5.3171	0.725239	0.621701	1.25994	1.24941	1.77837e+20	0.726134	0.594591	1.34958	0.743263	-4.44191e+19	0.695189	0.630641	1.15739
mp-24899	Cr2HgO4	1.25781	0.247695	0.414007	0.46277	1.06752	1.40592e+21	0.981552	0.803995	1.34893	0.281851	-1.0551e+19	0.192665	0.335334	0.435499
mp-580329	Pu3Sn	0	0.0544491	0.0328753	2.13148	2.66215	2.46189e+22	6.35639	5.21822	1.34441	0.0803982	-2.29645e+22	6.18873	5.11584	1.33053
mp-2290	NdRh2	0	0.0563	0.0127088	9.32409	2.29324	4.56793e+22	6.64104	5.45203	1.34436	0.0396166	-4.58991e+22	6.61968	5.40981	1.35358
mp-24507	Na6Zn3P4H6O19	3.978	0.612698	0.508345	1.32322	1.14175	1.22653e+20	0.607258	0.498574	1.3442	0.72339	-3.67297e+19	0.597877	0.529076	1.20127
mp-28710	BaGe2S5	2.1848	1.85513	1.38568	1.54906	1.92377	3.58697e+20	1.89204	1.55535	1.34169	1.31675	-1.34981e+20	1.87185	1.41443	1.52242
mp-18816	Fe2SiO4	2.7102	0.492694	0.717661	0.568835	1.76088	8.72215e+20	1.5654	1.28739	1.34082	0.423881	-4.45797e+20	1.29288	1.15305	1.18731
mp-1786	Ti3Au	0	0.00777265	0.013309	0.446309	2.88031	3.07818e+22	7.42738	6.11038	1.34014	0.0813322	-3.07818e+22	7.42738	6.11038	1.34014
mp-37990	AlPO4	5.4564	0.66996	0.697501	0.941361	2.94128	3.34997e+21	4.22687	3.47831	1.3396	0.701481	-3.95041e+19	0.675707	0.693501	0.961759
mp-541097	Zr3Pb(O2F3)2	2.8525	2.7156	1.98443	1.60083	2.14736	4.54239e+20	2.53653	2.08882	1.33816	1.63504	-2.24028e+20	2.65572	2.02089	1.50647
mp-38418	Tm2Ti2O7	2.6327	3.06479	2.38783	1.4541	3.16716	2.518e+21	4.71304	3.8861	1.33561	1.38652	-2.54946e+20	3.25595	2.52348	1.46561
mp-981	SrF2	6.7528	0.526131	0.548243	0.940115	0.964828	6.69805e+21	1.47411	1.21578	1.33511	0.631415	-2.848e+19	0.522266	0.539373	0.952804
mp-571467	Cs2NaYBr6	4.21751	4.87426	3.47441	1.66166	2.85577	1.07032e+21	4.56568	3.77468	1.33027	2.01618	-4.3535e+20	4.77276	3.57611	1.54183
mp-5024	ZrP2O7	4.4697	2.35037	1.72927	1.58456	2.09654	4.70838e+20	2.30831	1.91559	1.32278	1.50563	-1.83451e+20	2.34352	1.77066	1.52265
mp-253	ScCo2	0	0.141263	0.0165432	24.9524	2.31044	2.90877e+22	5.84862	4.85486	1.32226	0.0546849	-2.87193e+22	5.83326	4.86184	1.31422
mp-23406	Cs2PtCl6	2.128	2.17448	1.6269	1.54522	1.97461	3.7997e+20	2.10998	1.75451	1.31881	1.44324	-1.60733e+20	2.16143	1.65422	1.49357
mp-2545	YbHg	0	0.00796489	0.00403288	2.77553	0.0837603	1.70243e+21	0.0812056	0.0675518	1.31803	0.000480253	-1.70243e+21	0.0812056	0.0675518	1.31803
mp-605873	Pr4MgRu	0	0.183625	0.0903581	2.89699	0.826074	5.64758e+20	0.573733	0.478955	1.31106	0.0984602	-7.19874e+20	0.664537	0.597436	1.17312
mp-17926	Zr3Ni3Sb4	0.441396	0.796325	0.651232	1.35217	1.26839	1.27151e+20	0.799821	0.668074	1.30994	0.871819	-5.19172e+19	0.781723	0.620624	1.41363
mp-600023	SiO2	5.48801	0.666053	0.694182	0.939838	3.45305	3.39368e+21	5.74927	4.8023	1.30992	0.745538	-3.36031e+21	6.09882	5.27243	1.24409
mp-626193	Sc(HO)3	5.019	8.48959	6.08417	1.64827	3.68626	2.62901e+21	8.24461	6.88991	1.30899	2.42004	-9.53478e+20	8.46458	6.31686	1.55116
mp-23476	Cd7(P2Cl3)2	1.7985	1.27085	1.03181	1.36692	1.53529	2.167e+20	1.1878	0.993233	1.30779	1.07399	-8.00498e+19	1.28652	1.04085	1.37418
mp-20487	La3Ga	0	0.00806302	0.00841132	0.938534	1.34218	2.97595e+22	3.4144	2.85747	1.30617	0.0188649	-2.93025e+22	3.39881	2.85819	1.29674
mp-570203	MnCoSb	0	0.057865	0.1368	0.275101	6.30195	9.16407e+22	24.9457	20.8799	1.30587	0.21038	-9.14313e+22	25.2785	21.4173	1.28227
mp-2263	ScIr2	0	0.0370957	0.0176654	3.043	3.9797	6.49697e+22	13.5276	11.3666	1.29833	0.101598	-6.44107e+22	13.7767	11.9138	1.24349
mp-600005	SiO2	5.4398	0.652707	0.683066	0.934079	3.43422	4.35893e+21	5.83243	4.90957	1.29482	0.682991	-3.93801e+19	0.650495	0.675415	0.945171
mp-3538	Hg3TeO6	1.16091	0.814159	0.757897	1.11339	1.31016	2.59044e+20	0.856557	0.722073	1.292	0.747362	-4.88061e+19	0.784488	0.756291	1.05644
mp-672234	N2	2.9915	3.7771	2.96047	1.44111	2.685	1.18024e+21	3.70481	3.12482	1.29096	1.56222	-3.02215e+20	3.75586	2.97793	1.41642
mp-758925	Na6Zn3As4H6O19	2.99331	0.554617	0.473097	1.2693	1.05373	1.12913e+20	0.552442	0.468381	1.28095	0.674083	-3.24688e+19	0.533061	0.489448	1.1366
mp-3930	Sc2MnS4	0.612896	0.847102	0.70158	1.32675	1.30129	1.54382e+20	0.857134	0.727388	1.27916	0.893621	-4.9434e+19	0.829018	0.675913	1.35834
mp-3315	CaPd3O4	0	0.053802	0.0877048	0.480465	1.26819	2.29556e+21	1.43064	1.21723	1.27419	0.0935714	-2.08429e+21	1.38432	1.18818	1.25756
mp-723378	KAlH6(OF3)2	6.9767	0.526729	0.577078	0.872025	0.995412	5.65503e+20	0.72019	0.613419	1.27214	0.628784	-2.83801e+19	0.528188	0.554971	0.92849
mp-1295	Yb4Sb3	0	0.0244264	0.0381084	0.513164	1.51166	2.97976e+21	1.87542	1.59739	1.27212	0.113081	2.85464e+21	1.79901	1.49504	1.31999
mp-21855	VCu3Se4	0.853594	4.54726	3.32881	1.59658	2.89051	1.35051e+21	4.61159	3.93277	1.26978	1.79142	-4.003e+20	4.57429	3.47982	1.50713
mp-505421	Mn2CuO4	0	0.0906502	0.038876	3.56066	0.466122	8.25755e+20	0.366816	0.313071	1.26826	0.0250571	-4.22016e+19	0.0510303	0.0164448	5.46639
mp-571436	SnI4	1.5624	1.04928	0.859843	1.34806	1.4317	1.99289e+20	1.06485	0.910765	1.26423	0.991536	-6.57836e+19	1.04139	0.84213	1.37515
mp-1263	URu3	0	0.0475666	0.00365562	46.9365	1.67728	4.28078e+22	4.93534	4.22586	1.26213	0.0236246	-4.24801e+22	4.92826	4.23256	1.25642
mp-1085	UOs2	0	0.103044	0.0142676	19.4094	1.93208	2.75901e+22	4.94428	4.23912	1.25962	0.0427756	2.70566e+22	4.84213	4.09718	1.28477
mp-567185	SnHg6(As2Br3)2	1.36379	1.84982	1.44541	1.44779	1.76849	3.14362e+20	1.75069	1.50243	1.25784	1.30463	-1.26337e+20	1.83494	1.4508	1.42239
mp-640024	HfInNi2	0	0.00504704	0.00711606	0.597304	0.779235	2.95959e+22	2.02395	1.73831	1.25634	0.00661906	-2.94988e+22	2.02257	1.7406	1.25258
mp-7561	SrPd3O4	0	0.0460855	0.0912678	0.358815	1.27395	2.22945e+21	1.44231	1.24132	1.25244	0.0974493	-2.06516e+21	1.40393	1.21604	1.2405
mp-13614	Rb2Be3Cd2F12	5.2365	0.833917	0.732792	1.21398	1.26718	1.76213e+20	0.824169	0.709881	1.25097	0.808046	-5.38325e+19	0.822115	0.74196	1.16635
mp-550685	Ba2CaTeO6	2.9977	0.493569	0.574132	0.797084	1.31729	1.83138e+21	1.41022	1.21498	1.25048	0.581798	-2.78753e+19	0.482179	0.537686	0.849219
mp-20385	Nd3InC	0	0.0148732	0.0304855	0.340775	0.847545	5.87606e+21	1.29829	1.12205	1.24463	0.0234311	-5.49052e+21	1.25819	1.09396	1.23344
mp-20262	Pu3Pb	0	0.00954038	0.0352196	0.140985	2.39795	3.4594e+22	6.70149	5.79244	1.24441	0.0587008	-3.38455e+22	6.69758	5.90642	1.20751
mp-6115	K2Zn2(SO4)3	4.3516	0.636989	0.589764	1.12249	1.11103	1.96513e+20	0.660583	0.571728	1.24196	0.654923	-3.657e+19	0.588051	0.582451	1.01446
mp-903	ZrCr2	0	0.0299672	0.00890856	6.16962	3.98211	1.05365e+23	16.2569	14.0763	1.24115	0.0774508	-1.04868e+23	16.3244	14.2466	1.22656
mp-1022	K2S	2.323	0.376575	0.411382	0.875809	0.859298	3.79964e+21	1.14427	0.991616	1.23959	0.552138	-1.90285e+19	0.372461	0.390263	0.932361
mp-29746	Cd4P2Cl3	1.3806	0.521344	0.454613	1.22807	0.996882	1.07274e+20	0.520542	0.452396	1.23425	0.641509	-2.99165e+19	0.493922	0.466581	1.08917
mp-24868	Cr2CoO4	2.61199	6.56664	5.08392	1.46797	3.22666	1.99361e+21	5.97254	5.19381	1.23313	1.91646	-6.0868e+20	6.40211	5.12246	1.39723
mp-18633	K8SnSb4	0.319094	0.304628	0.454405	0.548895	4.02045	3.85874e+21	9.29954	8.09413	1.23151	1.57721	-3.77872e+21	11.3214	10.5618	1.10979
mp-6623	Rb2Cd2(SO4)3	3.6774	0.664636	0.602596	1.15834	1.12741	1.69851e+20	0.673232	0.586677	1.22927	0.689618	-3.94746e+19	0.627797	0.603058	1.06216
mp-8351	NaAlSiO4	4.48299	0.46732	0.508252	0.881663	0.814427	9.5391e+20	0.697965	0.609042	1.22682	0.635283	-2.68971e+19	0.49179	0.500368	0.974396
mp-6276	K2Cd2(SO4)3	3.6882	0.697046	0.633366	1.15454	1.15355	1.76294e+20	0.705806	0.616405	1.22526	0.706166	-4.2338e+19	0.662931	0.634081	1.06902
mp-567910	CdHg6(As2Br3)2	1.3417	1.81789	1.46283	1.38536	1.73526	3.1737e+20	1.7389	1.52021	1.22338	1.26061	-1.28741e+20	1.80677	1.4688	1.3643
mp-1223	La4Sb3	0	0.0195617	0.0397624	0.345065	4.3359	1.64756e+22	10.8366	9.47535	1.22306	0.38344	-1.64756e+22	10.8366	9.47535	1.22306
mp-849286	Ba(GaS2)2	2.8999	0.737278	0.632667	1.25801	1.18791	1.31533e+20	0.759296	0.665254	1.21937	0.78777	-4.75457e+19	0.671229	0.570773	1.27529
mp-333	HfFe2	0	0.0545001	0.0269636	2.87362	5.39339	9.94765e+22	22.5277	19.7785	1.21559	0.152142	-9.91924e+22	22.7597	20.198	1.19615
mp-21244	Cr3RhN	0	0.048952	0.00624451	21.9487	2.22663	1.18146e+23	9.42427	8.27824	1.21469	0.0223944	-1.18146e+23	9.42427	8.27824	1.21469
mp-14305	Lu2MnS4	1.0721	0.75815	0.653092	1.25075	1.20307	1.47248e+20	0.777203	0.682894	1.21415	0.808664	-4.46887e+19	0.715049	0.611138	1.26559
mp-10895	Mn2AlV	0	0.0112362	0.0176769	0.506782	2.00023	1.48886e+22	4.31249	3.79005	1.21373	0.070303	1.48886e+22	4.31249	3.79005	1.21373
mp-561543	BeF2	7.9633	0.774973	0.78556	0.979852	1.12836	6.99772e+21	1.8741	1.6497	1.21083	0.738477	-4.89028e+19	0.774629	0.784565	0.981063
mp-567334	Ag(BCl)6	2.69551	0.597763	0.527545	1.20616	1.05113	1.05199e+20	0.596049	0.526005	1.20625	0.718566	-3.64583e+19	0.596124	0.5443	1.14616
mp-5513	Tl3VS4	1.9756	5.16335	3.06259	2.18909	3.83697	4.9792e+22	12.6922	11.2412	1.19974	2.27805	-4.31987e+20	5.07812	3.14448	2.05225
mp-20194	CeO2	1.8671	21.2308	15.4084	1.61738	5.83031	1.18395e+22	20.8619	18.4811	1.19934	2.98498	-2.5325e+21	21.1671	16.0716	1.51149
mp-22503	ZrCo2Sn	0	0.0192777	0.0172556	1.18084	1.23465	1.73077e+22	2.78225	2.46631	1.19818	0.0252107	-1.61889e+22	2.68991	2.37073	1.2086
mp-1098	Yb4As3	0	0.037357	0.0387207	0.947641	1.59889	3.59063e+21	2.20819	1.96102	1.19489	0.126066	3.43046e+21	2.11001	1.82984	1.23825
mp-27554	Ag3AuS2	0.180303	0.306176	0.447516	0.565907	1.04938	1.84443e+21	1.14608	1.02008	1.19089	0.258213	-2.06067e+19	0.192628	0.291236	0.537913
mp-393	Pd16S7	0	0.0354074	0.0468086	0.657887	2.00368	7.46313e+21	3.53775	3.15184	1.18917	0.117988	-7.37935e+21	3.55079	3.18487	1.1772
mp-28171	K3IO	1.0264	0.357164	0.410881	0.810451	0.772396	4.1332e+21	1.0862	0.968296	1.1881	0.510098	-1.70072e+19	0.337164	0.372425	0.861398
mp-13240	ScInCu4	0	0.0404563	0.0572007	0.59481	2.9516	5.26689e+22	9.82828	8.76262	1.18786	0.0984213	-1.4726e+21	1.10907	0.430876	4.12963
mp-558539	Cs2Ba2(CO3)3	4.33809	1.22766	1.10823	1.16593	1.73932	5.14794e+20	1.66568	1.48634	1.18634	0.892785	-9.42436e+19	1.21703	1.10093	1.16229
mp-2720	NdPt2	0	0.0550167	0.01259	9.13489	1.38121	3.16622e+22	3.82824	3.41646	1.18613	0.0215931	-3.11586e+22	3.81417	3.41984	1.17786
mp-694981	Na4Al3Si3B(HO3)4	4.94721	0.489608	0.545507	0.850299	0.900747	5.28229e+20	0.665437	0.594249	1.18497	0.604384	-2.58752e+19	0.486483	0.517648	0.911068
mp-636232	CeInAu2	0	0.176061	0.0103519	70.1403	6.78479	1.40824e+23	33.0942	29.5968	1.18239	0.222407	-1.36881e+23	35.2169	34.6302	1.02552
mp-28914	Cd4P2Br3	1.39809	0.457467	0.41011	1.17812	0.900697	9.99291e+19	0.457467	0.410246	1.17753	0.581074	-2.4687e+19	0.418191	0.413823	1.01588
mp-11360	ScGaCu2	0	0.0216645	0.00553776	7.73787	0.367345	1.22967e+22	0.743222	0.667033	1.17613	0.00288082	-1.21245e+22	0.737445	0.661602	1.17679
mp-27192	CsBe2F5	7.1811	0.500281	0.555579	0.854479	0.868199	7.23334e+20	0.707469	0.636023	1.17314	0.630716	-2.82267e+19	0.51353	0.536195	0.937269
mp-677179	BaNaIn2(PO4)3	3.3431	0.612202	0.580793	1.08221	1.04693	1.80351e+20	0.633382	0.570773	1.16897	0.637224	-3.49309e+19	0.563223	0.569726	0.982928
mp-505628	Cr3IrN	0	0.063674	0.00629943	32.1359	1.83873	1.20283e+23	8.01845	7.22696	1.1687	0.0159761	-1.20283e+23	8.01845	7.22696	1.1687
mp-8878	Sr(BO2)2	6.3781	5.33417	4.02387	1.52628	2.71438	1.19767e+21	4.95492	4.48055	1.16294	2.13405	-5.86084e+20	5.33445	4.40232	1.33387
mp-768907	Sr3TeO6	3.04991	0.502023	0.582786	0.799506	1.13705	1.82343e+21	1.34949	1.22199	1.16052	0.578649	-2.81677e+19	0.493074	0.523206	0.914869
mp-10688	CeO	0	0.14503	0.0134259	35.5036	11.3224	3.96443e+23	82.6333	74.8414	1.16017	0.336505	-3.9481e+23	89.4457	87.9116	1.02629
mp-925	VN	0	0.0490551	0.00249508	87.1765	1.97898	2.50317e+23	11.0617	10.0216	1.15964	0.0114759	-2.49509e+23	11.1061	10.1703	1.14115
mp-23648	Li4Al3Si3ClO12	5.2612	0.470433	0.529026	0.838555	0.852572	5.94982e+20	0.659464	0.597709	1.15891	0.605124	-2.56055e+19	0.476579	0.504524	0.918077
mp-371	La3Tl	0	0.0108714	0.0102425	1.0935	1.15001	2.88759e+22	3.13858	2.84815	1.1568	0.0166273	-2.86304e+22	3.13207	2.84614	1.15442
mp-560174	NaZn(PO3)3	4.8271	0.570553	0.581426	0.972079	1.01236	2.33424e+20	0.636215	0.577634	1.15592	0.605325	-2.9246e+19	0.522041	0.554881	0.912552
mp-22151	BaGePt	0	0.0371033	0.027244	1.58933	2.72589	1.80734e+22	6.61296	6.00877	1.15456	0.13009	-1.7478e+22	6.63287	6.19207	1.10866
mp-14607	KSbO3	1.7859	0.471422	0.478676	0.977357	0.878316	2.26828e+20	0.524107	0.476496	1.15356	0.526967	-2.28754e+19	0.399223	0.440778	0.861973
mp-1777	Li15Ge4	0	0.190268	0.051325	7.13766	3.2456	3.78475e+21	6.03073	5.48943	1.1515	0.698078	-3.72208e+21	6.36188	5.96919	1.10029
mp-740719	Ba3In2(HO)12	3.2604	0.475835	0.514889	0.888412	0.910653	2.75711e+20	0.576593	0.524919	1.15124	0.557803	-2.29052e+19	0.43351	0.47504	0.871773
mp-571330	Nd3AlC	0	0.0360311	0.0265154	1.58405	0.73988	7.21662e+21	1.27876	1.16637	1.14795	0.0173513	-6.81912e+21	1.24594	1.14316	1.13785
mp-20969	NpSb	0	0.207801	0.0667023	5.49871	3.24277	2.65671e+22	9.05362	8.27903	1.14357	0.155514	-2.32078e+22	8.62969	8.08023	1.10372
mp-18684	KPF6	7.221	0.618983	0.677481	0.873319	0.984498	7.47605e+20	0.836402	0.765285	1.14258	0.665552	-3.56558e+19	0.624369	0.661938	0.916085
mp-27831	Rb2ZrCl6	3.562	5.91369	4.60432	1.45559	2.7834	1.32851e+21	5.46176	5.01262	1.13737	2.11368	-6.29459e+20	5.72126	4.77503	1.31151
mp-7331	Cs2MgFe(CN)6	4.1748	7.48189	5.93918	1.41392	3.41091	2.83302e+21	7.36389	6.76312	1.13616	1.94638	-7.45715e+20	7.45764	6.14413	1.33724
mp-24126	Sr3Al2(HO)12	3.88589	0.471384	0.529969	0.838854	0.889499	3.6544e+20	0.611727	0.563183	1.13204	0.566404	-2.36704e+19	0.446003	0.490307	0.86757
mp-23882	Ca3Al2(HO)12	4.1187	0.474812	0.538751	0.827371	0.886651	4.13688e+20	0.63232	0.583395	1.1284	0.573033	-2.42662e+19	0.455938	0.500648	0.869081
mp-15103	Sr3Y2(GeO4)3	3.13589	0.401949	0.464185	0.805785	0.799834	3.7365e+20	0.546487	0.504666	1.12685	0.536393	-1.94888e+19	0.381612	0.420183	0.865517
mp-755116	In2Pt2O7	2.04919	0.646427	0.692482	0.901916	2.99526	2.59306e+22	8.34106	7.71959	1.12316	0.597152	-3.08375e+19	0.539564	0.574891	0.909258
mp-1888	RbGe	1.015	1.59192	1.34744	1.28415	1.44879	1.91456e+20	1.51419	1.40191	1.12251	1.30574	-1.17767e+20	1.57697	1.358	1.25137
mp-2489	UC	0	0.12607	0.00711397	74.6016	5.45259	3.37431e+23	35.0839	32.4925	1.12199	0.0756099	-3.36642e+23	35.2655	32.9523	1.10713
mp-560894	Li4Be3P3ClO12	6.2181	0.528113	0.589165	0.848662	0.883787	6.82662e+20	0.732789	0.679231	1.12058	0.63167	-3.00852e+19	0.536154	0.568633	0.91556
mp-14052	Ca3In2(SiO4)3	3.668	0.409153	0.475173	0.799008	0.789086	4.57203e+20	0.575659	0.535307	1.11517	0.550503	-2.04965e+19	0.399225	0.436189	0.87562
mp-556961	SiO2	5.4801	0.556092	0.592049	0.910299	0.858011	5.11193e+21	1.38091	1.28419	1.11507	0.646227	-3.15006e+19	0.557371	0.57806	0.946798
mp-571478	SnHg7(As2I3)2	0.946398	0.523932	0.498678	1.07692	0.941734	7.40684e+19	0.542912	0.504902	1.11502	0.721718	-3.34431e+19	0.558665	0.51603	1.12646
mp-5800	Sm3Ga5O12	3.1576	0.302246	0.365437	0.752179	0.644913	4.79489e+20	0.469903	0.437039	1.11489	0.50198	-1.43495e+19	0.301026	0.324185	0.894777
mp-4612	TiCo2Ge	0	0.0380711	0.0155307	3.83802	1.48778	5.59199e+22	5.19383	4.83383	1.11377	0.0187916	-5.54142e+22	5.19412	4.86502	1.10317
mp-669331	Ca3Y2(GeO4)3	3.2592	0.403265	0.468534	0.798498	0.791157	4.02629e+20	0.556588	0.518032	1.11369	0.539861	-1.97733e+19	0.386654	0.425537	0.866121
mp-10848	AsPdS	0	0.0887644	0.0183202	10.665	1.72587	1.78091e+22	4.16194	3.87755	1.112	0.0539011	-1.75128e+22	4.15461	3.9178	1.09202
mp-1702	LaRh2	0	0.0421437	0.0113474	7.15734	2.07585	4.31975e+22	6.71067	6.25832	1.11036	0.0432283	-4.31975e+22	6.71067	6.25832	1.11036
mp-35785	Y2CdS4	1.1108	0.283104	0.347088	0.736647	0.694967	2.66095e+21	0.884408	0.825082	1.10977	0.44299	-1.17705e+19	0.249379	0.284397	0.821113
mp-1412	Ti3Sb	0	0.0441701	0.0110893	7.94946	3.01024	4.96721e+22	10.3385	9.65168	1.10862	0.085783	-4.88804e+22	10.5345	10.3231	1.03088
mp-2423	US	0	0.0762098	0.0126215	14.8371	5.05614	2.58338e+23	30.0344	28.0393	1.10861	0.212527	-2.05539e+23	43.3117	71.6155	0.470324
mp-510349	Ag13OsO6	0	0.111774	0.0332316	6.16853	1.63812	2.15018e+22	4.20098	3.92199	1.10858	0.0487892	-1.41758e+21	0.731512	0.407361	2.40637
mp-1043	HfV2	0	0.0368192	0.010448	6.61552	1.45517	2.95805e+22	4.13171	3.8575	1.1085	0.0275484	3.04828e+22	4.23343	4.01571	1.08242
mp-5965	Tb3Ga5O12	3.27909	0.300468	0.362725	0.753931	0.634124	4.93477e+20	0.468086	0.437379	1.10714	0.502152	-1.42977e+19	0.300018	0.322445	0.897506
mp-15239	Nd3Ga5O12	3.0611	0.304304	0.367815	0.752517	0.644929	4.66406e+20	0.468254	0.437621	1.10682	0.501453	-1.44207e+19	0.301669	0.325615	0.891745
mp-8426	K2Se	2.091	0.343983	0.375889	0.875417	0.692864	3.56225e+21	0.97197	0.908405	1.10678	0.524995	-1.67197e+19	0.33443	0.353837	0.918871
mp-16267	Dy2CdS4	1.08769	0.275636	0.338115	0.736051	0.666573	2.62714e+21	0.846307	0.791552	1.10553	0.43387	-1.11285e+19	0.239903	0.275156	0.814114
mp-7652	Na5TlO4	1.1596	0.490947	0.490756	1.00058	0.876166	1.72896e+20	0.52227	0.488621	1.10506	0.533719	-2.45391e+19	0.416332	0.4544	0.877007
mp-1387	AlV3	0	0.0736578	0.0129513	13.563	2.5697	4.49646e+22	8.5073	7.96255	1.10436	0.0672059	-4.39526e+22	8.65003	8.49523	1.02746
mp-15576	Dy3Ga5O12	3.3047	0.299264	0.361328	0.753754	0.63042	4.95941e+20	0.466873	0.437081	1.10397	0.501945	-1.42307e+19	0.299242	0.321362	0.89855
mp-5444	Y3Ga5O12	3.35291	0.311431	0.37467	0.757823	0.647973	4.91008e+20	0.47979	0.449775	1.10175	0.507442	-1.49079e+19	0.310203	0.33433	0.893733
mp-677095	Na2CaSn2(GeO4)3	2.3158	0.334578	0.400078	0.764765	0.678369	4.53068e+20	0.49852	0.467432	1.1014	0.509048	-1.60688e+19	0.329404	0.355409	0.89228
mp-780561	La3Ga5O12	2.86901	0.32459	0.389549	0.760608	0.673285	4.4497e+20	0.48491	0.454778	1.10101	0.509736	-1.54395e+19	0.318953	0.3462	0.884299
mp-15575	Ho3Ga5O12	3.3261	0.298274	0.359899	0.754489	0.625247	5.00522e+20	0.46519	0.436404	1.10056	0.501475	-1.42034e+19	0.298309	0.320235	0.899077
mp-12236	Er3Ga5O12	3.3298	0.29693	0.358252	0.754566	0.621689	5.0619e+20	0.464257	0.43571	1.09987	0.500625	-1.41514e+19	0.296994	0.318796	0.899191
mp-23651	Na4Al3Ge3IO12	3.40061	0.4252	0.487991	0.81334	0.789035	4.55803e+20	0.582299	0.547606	1.09652	0.568596	-2.11497e+19	0.420903	0.453029	0.895537
mp-560768	NaSr4(BO3)3	3.98001	0.5213	0.537948	0.953942	0.923691	2.03853e+20	0.573239	0.539839	1.09423	0.578052	-2.57028e+19	0.470031	0.506691	0.893462
mp-4657	Li5GaO4	3.76299	0.536135	0.599952	0.844765	0.8957	4.49675e+20	0.695587	0.655078	1.09418	0.599732	-2.83361e+19	0.523256	0.562347	0.897561
mp-556287	NaBi2Sb3O11	2.40619	2.08145	1.88685	1.15862	1.74288	4.40478e+20	1.95989	1.84616	1.09382	1.17007	-1.61436e+20	2.06482	1.87825	1.15264
mp-6527	Na3Li3In2F12	5.28959	0.712719	0.753027	0.920792	1.1109	3.30599e+20	0.818412	0.771143	1.09334	0.665377	-4.08711e+19	0.681322	0.729228	0.903096
mp-554560	Li4Be3P3BrO12	5.86501	0.503945	0.56482	0.842771	0.836775	6.67284e+20	0.698266	0.658239	1.09259	0.619665	-2.68786e+19	0.511805	0.543258	0.914422
mp-10889	La3Al	0	0.000405669	0.00870977	0.0100519	1.14793	2.80886e+22	3.2314	3.05117	1.0899	0.0183027	-2.76575e+22	3.21956	3.05089	1.08406
mp-20909	La3In	0	0.0051204	0.0100907	0.361471	1.12432	2.79702e+22	3.16205	2.98775	1.08877	0.0175221	-2.79702e+22	3.16205	2.98775	1.08877
mp-6942	Ho2CdS4	1.1167	0.275823	0.338188	0.736562	0.651708	2.65798e+21	0.839347	0.793459	1.08799	0.433398	-1.12559e+19	0.240055	0.275786	0.812096
mp-554203	Li4Ga3Si3ClO12	4.4119	0.490907	0.557525	0.826234	0.846283	5.59373e+20	0.673377	0.637163	1.08645	0.604705	-2.60741e+19	0.492142	0.52832	0.899063
mp-18352	HfTe3O8	3.8435	2.08302	1.75255	1.29579	1.69255	3.45112e+20	2.04703	1.93837	1.08525	1.34662	-1.65522e+20	2.07499	1.80166	1.23599
mp-1556	PuTe	0	0.0386442	0.0714711	0.397585	6.62615	1.31782e+23	33.87	32.0807	1.08482	0.242651	-1.31122e+23	36.0023	36.7868	0.968182
mp-441	Rb2Te	1.88431	0.321735	0.355352	0.861507	0.686182	2.64652e+21	0.885518	0.839194	1.08393	0.510698	-1.57153e+19	0.312651	0.331782	0.914764
mp-4813	NbAlNi2	0	0.0220733	0.0100503	3.25484	2.66168	8.3526e+22	10.9081	10.3388	1.08372	0.0469596	-8.32433e+22	10.9449	10.4408	1.0733
mp-571183	TmFe2	0	0.225206	0.0173614	46.719	3.20916	4.9784e+22	11.2839	10.7206	1.07984	0.0985362	-4.94383e+22	11.3354	10.8566	1.06687
mp-554003	Sr4Li(BO3)3	4.18751	0.529231	0.549805	0.944397	0.922984	2.08213e+20	0.582808	0.55413	1.07863	0.582708	-2.65604e+19	0.480516	0.51858	0.891947
mp-8059	SiO2	5.5887	0.546457	0.582836	0.90785	0.84714	5.22451e+21	1.378	1.31243	1.07586	0.641	-3.01832e+19	0.547789	0.57067	0.940466
mp-3041	Er2CdS4	1.14661	0.275443	0.338731	0.733271	0.641479	2.68134e+21	0.834805	0.795229	1.07557	0.434357	-1.1399e+19	0.241341	0.277077	0.81292
mp-4324	Tm2CdS4	1.1768	0.275828	0.339381	0.732698	0.638696	2.70737e+21	0.834802	0.7962	1.0736	0.439367	-1.16706e+19	0.243183	0.276667	0.824069
mp-638586	Te3Pd13	0	0.00115947	0.0160631	0.019393	1.526	2.91281e+22	4.41241	4.21149	1.07241	0.0316134	-2.91281e+22	4.41241	4.21149	1.07241
mp-28161	Na3P6N11	3.8178	0.773335	0.748297	1.05061	1.11191	1.7132e+20	0.778515	0.743176	1.07217	0.73441	-4.98984e+19	0.752325	0.74475	1.01529
mp-20809	Cr4InCuSe8	0	0.253874	0.348617	0.621448	0.845162	3.42348e+20	0.590854	0.564368	1.07122	0.185656	-2.69492e+20	0.543913	0.533297	1.03001
mp-6800	KLiSO4	5.32451	0.626937	0.640693	0.967967	0.923584	1.1305e+20	0.649436	0.620324	1.07121	0.643668	-3.41939e+19	0.629189	0.610638	1.04591
mp-556649	Li4Ga3Si3BrO12	3.9512	0.473508	0.539196	0.822947	0.816817	5.4504e+20	0.650399	0.622282	1.06854	0.595468	-2.54023e+19	0.474247	0.510409	0.895633
mp-12533	La2Hf2O7	4.2328	6.31952	5.19554	1.34147	2.68425	1.33175e+21	5.62206	5.38055	1.06808	2.13979	-6.98021e+20	5.98826	5.27934	1.20804
mp-8703	Na3SbSe4	0.976603	0.639754	0.776798	0.747408	1.46118	1.23609e+21	1.61418	1.54568	1.06721	0.593677	-3.54583e+19	0.601828	0.713241	0.775094
mp-29983	Cs6Cl4O	1.984	0.406478	0.468829	0.807298	0.716572	4.03588e+20	0.542897	0.520086	1.0665	0.537852	-1.98942e+19	0.395134	0.422673	0.903879
mp-2209	CeGa2	0	0.18338	0.0278861	16.8635	5.18739	2.12628e+23	34.8971	33.4786	1.06422	0.125676	-2.12521e+23	35.2991	34.82	1.02071
mp-6179	KLiSO4	5.3235	0.62444	0.641749	0.959816	0.922503	1.18817e+20	0.648742	0.622537	1.0638	0.641591	-3.45094e+19	0.627892	0.611718	1.03992
mp-5026	MgSiO3	4.6064	0.460114	0.472738	0.960213	0.784147	6.69986e+19	0.46162	0.443497	1.06192	0.572338	-2.29252e+19	0.446504	0.436738	1.03373
mp-18999	NaMn7O12	0	0.0482132	0.0205809	3.58554	2.75216	1.79462e+22	7.10348	6.82993	1.06068	0.155925	-1.7875e+22	7.16816	6.96712	1.04359
mp-986	CeZn	0	0.200314	0.0187585	34.8956	2.1888	3.32674e+23	14.3039	13.7742	1.05823	0.0403871	-1.9019e+23	17.8622	57.2345	0.174347
mp-21235	Mn2VGa	0	0.0224501	0.0191084	1.27348	1.72353	1.54172e+22	4.10658	3.95464	1.05818	0.0616102	1.51245e+22	4.0202	3.81684	1.08097
mp-13771	Sc2Cd3(GeO4)3	2.3032	0.303465	0.370191	0.742206	0.62263	4.66071e+20	0.466325	0.449769	1.05572	0.496513	-1.43529e+19	0.298845	0.325064	0.881489
mp-2439	ZrNi5	0	0.0110556	0.0131817	0.768099	1.35617	3.2216e+22	4.089	3.94411	1.05561	0.0245753	-3.10467e+22	4.06938	4.03879	1.01138
mp-760375	Li3VS4	1.8951	4.37311	3.75908	1.25477	2.54898	1.42516e+21	4.46304	4.30683	1.0549	1.59139	-4.18139e+20	4.41118	3.89739	1.20412
mp-2497	GdZn	0	0.0263171	0.00961394	4.52902	6.65241	1.37532e+23	35.2726	34.0889	1.05254	0.244548	-1.34625e+23	35.7454	35.3665	1.01611
mp-530571	Na4Sn3O8	2.3778	0.333773	0.401595	0.757697	0.650672	4.9701e+20	0.500253	0.484014	1.05075	0.528404	-1.63333e+19	0.337348	0.361105	0.902958
mp-9480	KAlSiO4	4.5011	0.512079	0.526797	0.958385	0.834933	1.51099e+20	0.538892	0.521482	1.05049	0.594679	-2.80188e+19	0.503366	0.507478	0.987869
mp-1926	HoFe2	0	0.225107	0.0181773	43.5801	3.17998	4.85483e+22	11.3358	10.9945	1.04693	0.102388	-4.82085e+22	11.3883	11.1365	1.0341
mp-677573	NaCa2Mg2(AsO4)3	2.9901	0.410814	0.480834	0.789725	0.753699	4.25484e+20	0.564678	0.548692	1.04402	0.54488	-2.05888e+19	0.398675	0.438648	0.866474
mp-22168	Mn(InS2)2	0.921704	1.07369	0.995654	1.11983	1.28667	2.26255e+20	1.10154	1.07217	1.04136	0.910864	-7.08835e+19	1.06654	0.977988	1.13885
mp-27528	Cd4As2I3	1.17261	0.368818	0.356651	1.0516	0.736585	7.9631e+19	0.367125	0.35798	1.03856	0.502878	-1.8009e+19	0.323048	0.342952	0.914222
mp-1757	DyFe2	0	0.224372	0.0185899	41.9313	3.19044	4.78525e+22	11.3981	11.1206	1.03766	0.104994	-4.75153e+22	11.448	11.266	1.02432
mp-561689	CsLiMoO4	4.42669	5.32718	4.4633	1.30396	2.57209	1.3261e+21	5.04631	4.93042	1.03546	1.85237	-5.42785e+20	5.23431	4.62947	1.20224
mp-778877	Li5InO4	2.4721	0.489893	0.562636	0.812476	0.824095	4.27098e+20	0.64948	0.634805	1.03488	0.578282	-2.54035e+19	0.474228	0.518048	0.875843
mp-15833	Zn4P6SN12	4.09631	0.926486	1.08154	0.792852	1.59281	1.57591e+21	1.96233	1.91866	1.03434	0.696406	-6.06285e+19	0.90585	1.04985	0.801485
mp-589	TbFe2	0	0.222834	0.0190181	40.1069	3.20627	4.70524e+22	11.4605	11.2362	1.03009	0.107563	-4.70524e+22	11.4605	11.2362	1.03009
mp-2391	YbPd3	0	0.0205772	0.00701381	5.02514	0.311913	1.05187e+22	0.654512	0.641816	1.02982	0.00275552	-1.05187e+22	0.654512	0.641816	1.02982
mp-5259	RbAlF4	6.93649	0.510147	0.526322	0.954258	0.831476	1.13953e+20	0.528682	0.519193	1.02754	0.611436	-2.71793e+19	0.513216	0.509037	1.01234
mp-2910	KAlF4	6.9378	0.547256	0.564114	0.955509	0.858575	1.37609e+20	0.570933	0.560746	1.02737	0.628911	-3.02317e+19	0.549707	0.547642	1.00566
mp-8269	Lu2CdS4	1.2348	0.277292	0.34161	0.731327	0.601714	2.72575e+21	0.812045	0.798263	1.02601	0.440184	-1.12737e+19	0.244566	0.278348	0.823594
mp-1576	TmNi2	0	0.0395005	0.0149972	4.27455	1.17063	3.88204e+22	3.82455	3.7644	1.02406	0.0162163	-3.88204e+22	3.82455	3.7644	1.02406
mp-25100	Ni2GeO4	2.1356	0.306268	0.371461	0.748655	0.68505	1.89864e+21	0.824964	0.812363	1.02336	0.322532	-1.26135e+19	0.220293	0.339085	0.523647
mp-6404	BaCa2(PN2)6	4.07261	1.34859	1.229	1.14946	1.34016	2.04083e+20	1.33562	1.31583	1.02265	1.06851	-9.39577e+19	1.34936	1.22458	1.15668
mp-6860	Na3AlP3NO9	4.99289	0.553212	0.548046	1.01417	0.906736	1.19336e+20	0.555243	0.547761	1.02056	0.638963	-3.09591e+19	0.535637	0.543596	0.978118
mp-6280	Al2Si(O2F)2	5.6953	0.475573	0.490114	0.95583	0.79639	1.15983e+20	0.487293	0.481024	1.01961	0.582037	-2.49302e+19	0.460239	0.467925	0.975462
mp-23145	Na4Al3Si3ClO12	4.69479	0.548085	0.545917	1.00596	0.9009	1.29953e+20	0.553202	0.546117	1.01952	0.632273	-3.02625e+19	0.527066	0.537527	0.970952
mp-557112	Li4Ga3Si3IO12	3.4397	0.45405	0.52285	0.809263	0.765885	5.30461e+20	0.622499	0.614952	1.01847	0.585242	-2.42838e+19	0.454989	0.491603	0.89039
mp-540	ScFe2	0	0.227634	0.0155115	56.218	4.46384	1.31038e+23	22.6802	22.4664	1.01431	0.112293	-1.31038e+23	22.6802	22.4664	1.01431
mp-23147	Na4Al3Si3BrO12	4.6098	1.46989	2.57318	0.431743	0.880135	1.24796e+20	0.533199	0.528519	1.01331	0.622451	-2.93394e+19	0.507439	0.518765	0.967431
mp-29799	KBiO3	0.491397	0.539331	0.560564	0.943724	0.89203	1.81897e+20	0.574358	0.569376	1.01316	0.564621	-2.90686e+19	0.476537	0.524748	0.865403
mp-6067	Tl2Cd2(SO4)3	4.0064	1.7738	1.6334	1.13167	1.46442	2.66378e+20	1.64216	1.6301	1.01112	1.14007	-1.2832e+20	1.75065	1.63063	1.11242
mp-639705	SiO2	5.4941	0.638687	0.663521	0.944386	0.9274	1.13156e+20	0.64445	0.6405	1.00926	0.659432	-3.59699e+19	0.63714	0.632272	1.01157
mp-21255	FeGe	0.0902057	0.0529886	0.128053	0.26619	3.84179	4.44051e+22	13.9916	13.9096	1.00885	0.258707	-7.41403e+21	5.2795	5.48732	0.943732
mp-5347	KAlF4	6.7888	0.562006	0.57542	0.965237	0.878986	1.23837e+20	0.574047	0.571196	1.0075	0.639505	-3.04833e+19	0.560627	0.561022	0.998944
mp-626194	Sc(HO)3	4.8739	6.68851	5.75135	1.25412	2.95465	2.38976e+21	7.03004	6.99979	1.00649	1.85117	-7.42407e+20	6.86513	6.11642	1.18913
mp-23656	Na4Ga3Si3ClO12	4.1073	1.42577	2.45376	0.442917	0.881025	1.20154e+20	0.539027	0.538165	1.00241	0.62325	-2.8955e+19	0.514216	0.528428	0.959928
mp-29044	Cd4Sb2I3	1.12969	0.40007	0.409232	0.966606	0.770327	6.39153e+19	0.409738	0.409527	1.00077	0.573051	-2.28182e+19	0.397078	0.404549	0.972429
mp-4693	RbAlF4	6.9452	0.499285	0.523061	0.932599	0.81206	7.41625e+19	0.509728	0.509472	1.00075	0.607679	-2.65524e+19	0.50371	0.503855	0.99957
mp-1609	Cr3Ir	0	0.0166815	0.0111399	1.83245	2.30927	1.30377e+23	11.5177	11.5141	1.00046	0.0295304	-1.30978e+23	11.4851	11.4374	1.00625
mp-1217	KSi	1.2619	1.50741	1.38114	1.14022	1.31103	1.78252e+20	1.45188	1.45195	0.999924	1.20385	-1.10878e+20	1.49972	1.39103	1.11947
mp-14565	K3P6N11	3.9959	0.780343	0.781413	0.997948	1.06119	1.55574e+20	0.781627	0.782074	0.999142	0.73455	-5.17894e+19	0.764392	0.775337	0.9789
mp-23659	Na4Ga3Si3BrO12	4.0513	1.47322	2.65704	0.412864	0.863167	1.18494e+20	0.522074	0.522718	0.998154	0.609085	-2.74208e+19	0.493879	0.512329	0.946473
mp-570135	SnHg7(P2Br3)2	1.6483	0.873027	0.866993	1.01046	1.06287	1.07888e+20	0.864559	0.866074	0.997377	0.894599	-5.99171e+19	0.914619	0.87627	1.06636
mp-921	YRh2	0	0.0787618	0.011722	17.4169	2.61219	6.28275e+22	10.3511	10.3838	0.995288	0.0625033	-6.30933e+22	10.2805	10.2593	1.00309
mp-554736	CaB2(H6O5)2	5.45649	0.541197	0.580713	0.899688	0.81783	8.14614e+19	0.550365	0.552953	0.99299	0.619056	-2.85456e+19	0.544949	0.542484	1.00682
mp-41734	Na8Al6Si6SO28	3.88649	0.550815	0.597098	0.886013	0.853085	3.39096e+20	0.63365	0.636873	0.992419	0.6253	-2.95722e+19	0.54097	0.575244	0.911973
mp-18220	LiAlSiO4	5.05811	0.511741	0.525701	0.960432	0.831142	8.46274e+19	0.512671	0.515366	0.992167	0.624836	-2.96156e+19	0.512849	0.512756	1.00027
mp-28590	Hg4As2I3	0.658896	0.334553	0.334764	0.999058	0.655505	9.13924e+19	0.331744	0.334009	0.989846	0.440181	-1.36652e+19	0.260616	0.295613	0.827783
mp-2636	GdMg	0	0.0787012	0.0145151	12.6253	6.76464	1.14851e+23	36.3744	36.634	0.989391	0.311433	-1.13657e+23	36.7552	37.4962	0.9705
mp-258	ZrV2	0	0.000405618	0.0102954	0.00782007	1.34499	3.89065e+22	4.51217	4.54904	0.987867	0.0230277	-3.81948e+22	4.52252	4.65894	0.956401
mp-15951	BeF2	8.3241	0.672665	0.687388	0.968043	0.958319	1.29825e+20	0.675767	0.681299	0.987844	0.699986	-3.98539e+19	0.676253	0.671833	1.00988
mp-19239	Mg6MnO8	2.3029	1.32423	1.25786	1.08019	1.34792	2.63048e+20	1.32376	1.33508	0.987314	0.975584	-9.25411e+19	1.32411	1.25477	1.08402
mp-3762	VCu3S4	1.0305	4.59919	3.94279	1.25985	2.39654	1.2094e+21	4.587	4.62806	0.98672	1.67399	-4.4639e+20	4.60305	4.15858	1.16453
mp-1570	YFe2	0	0.228737	0.0188789	42.1733	3.03984	4.74548e+22	11.1923	11.2955	0.986325	0.102001	-4.74548e+22	11.1923	11.2955	0.986325
mp-8352	SiO2	5.365	0.600581	0.609624	0.977832	0.916561	8.92954e+19	0.604089	0.610085	0.985295	0.701629	-3.55547e+19	0.620922	0.615143	1.01412
mp-29468	Rb6Cl4O	1.6658	0.479371	0.492994	0.958836	0.791524	1.05765e+20	0.482655	0.487476	0.985205	0.578723	-2.48593e+19	0.458829	0.469467	0.966204
mp-2596	NpN	0	0.0157367	0.0175988	0.84556	3.94228	2.68557e+23	25.4759	25.7424	0.984514	0.0543877	-2.68557e+23	25.4759	25.7424	0.984514
mp-20066	CO2	6.6332	0.745678	0.752172	0.987078	1.02597	1.54073e+20	0.744459	0.752922	0.983189	0.732587	-4.47366e+19	0.745493	0.750957	0.989105
mp-468	AlF3	7.6012	0.551832	0.572094	0.947347	0.858628	9.58563e+19	0.553312	0.559965	0.982231	0.633709	-2.9258e+19	0.547772	0.551863	0.988902
mp-16031	Sn3N4	0.234004	0.12908	0.187319	0.572029	0.382819	1.26894e+21	0.411861	0.417304	0.980498	0.178075	-8.38023e+18	0.0773161	0.0951053	0.732989
mp-6922	SiO2	5.53109	0.527236	0.553764	0.929011	0.827297	8.61057e+19	0.529566	0.536582	0.98045	0.627568	-2.95096e+19	0.527068	0.526821	1.00071
mp-556143	Na3Ga3(TeO6)2	1.8467	0.352907	0.428735	0.746806	0.655503	4.57089e+20	0.516516	0.523597	0.979785	0.515973	-1.71074e+19	0.343405	0.380255	0.858218
mp-14039	K2NaRhF6	2.0202	3.89739	3.40657	1.22373	2.12893	8.45834e+20	3.70585	3.75798	0.979268	1.6452	-3.77062e+20	3.83308	3.53613	1.12857
mp-17895	K3BeF5	6.2167	0.572314	0.588186	0.959798	0.878768	9.29143e+19	0.573766	0.581845	0.979247	0.663928	-3.36336e+19	0.580467	0.580688	0.99943
mp-22356	In2HgS4	0.354306	0.11544	0.180843	0.510015	0.37664	4.9047e+20	0.296945	0.301371	0.978049	0.221454	-3.49791e+18	0.065298	0.0802795	0.733573
mp-1167	CF4	9.06081	0.714446	0.731806	0.964629	0.978906	1.46389e+20	0.718075	0.729182	0.97724	0.698788	-4.24102e+19	0.721395	0.724376	0.993834
mp-558632	KNaSO4	4.96151	0.558089	0.587057	0.926905	0.846524	9.31797e+19	0.56019	0.568876	0.977183	0.638621	-3.17767e+19	0.556874	0.558951	0.994431
mp-16107	Rb3P6N11	3.9206	0.729169	0.741612	0.974938	1.01301	1.47388e+20	0.732814	0.744488	0.976573	0.704067	-4.71761e+19	0.709329	0.731699	0.954493
mp-3042	K2SiF6	7.2224	0.588705	0.59827	0.976112	0.906062	9.91669e+19	0.588825	0.598427	0.97603	0.680137	-3.39107e+19	0.596799	0.598994	0.994509
mp-27837	NaHF2	6.8151	0.628668	0.649127	0.953097	0.91626	1.27662e+20	0.630817	0.641221	0.975761	0.670549	-3.5427e+19	0.625096	0.631541	0.984733
mp-570510	Xe	6.1938	0.496968	0.529708	0.908736	0.799247	8.98593e+19	0.504206	0.512605	0.975524	0.61327	-2.63712e+19	0.499962	0.503349	0.989924
mp-42160	Na8Al6Si6SO28	4.1847	0.539005	0.585816	0.882568	0.826983	3.37966e+20	0.618687	0.629432	0.974503	0.626012	-2.85674e+19	0.533072	0.563648	0.919743
mp-777963	Li3SbH18S4O9	2.1609	0.710248	0.719188	0.981413	0.987974	1.20776e+20	0.707363	0.720094	0.973598	0.720891	-4.72542e+19	0.702573	0.713619	0.97687
mp-1798	CeMg3	0	0.280023	0.0265071	34.3357	7.62723	1.16436e+23	43.8857	44.6931	0.973026	0.473373	-1.14231e+23	46.1173	49.3083	0.904515
mp-12807	KAlO2	3.7538	0.433067	0.45932	0.915502	0.754337	7.58567e+19	0.438263	0.446559	0.972265	0.583689	-2.28858e+19	0.438734	0.443168	0.985031
mp-6319	Na2MgAlF7	6.6578	0.575725	0.590979	0.961534	0.880121	9.60432e+19	0.578265	0.589278	0.972096	0.665543	-3.27515e+19	0.584235	0.585208	0.997508
mp-697027	NaSi2(HO2)3	5.06949	0.509399	0.536784	0.92446	0.809022	1.10338e+20	0.522093	0.532174	0.971721	0.608236	-2.72641e+19	0.509757	0.512592	0.991715
mp-19931	Na2MgAlF7	6.6702	0.575164	0.592792	0.955726	0.881739	1.08587e+20	0.579363	0.591561	0.969232	0.652789	-3.18487e+19	0.575272	0.583464	0.979013
mp-30005	Rb6Br4O	1.5309	0.433741	0.449042	0.949326	0.745226	8.94545e+19	0.433526	0.442786	0.968796	0.554349	-2.18605e+19	0.411739	0.42453	0.955151
mp-5488	LiInO2	1.8353	0.301918	0.333417	0.861691	0.602639	3.32639e+19	0.296496	0.30293	0.96831	0.487727	-1.35506e+19	0.29144	0.295719	0.978375
mp-2151	Mg17Al12	0	0.0260242	0.010981	3.64839	0.832107	2.02621e+22	2.27064	2.32013	0.968174	0.0136842	-2.02621e+22	2.27064	2.32013	0.968174
mp-560653	RbNaLi6(SiO4)2	4.5937	0.523163	0.557921	0.908022	0.806171	8.37734e+19	0.527714	0.539405	0.967666	0.619768	-2.83546e+19	0.527702	0.52755	1.00043
mp-861906	BaNa2Mg(PO4)2	5.044	0.458587	0.486837	0.914234	0.764304	6.78582e+19	0.458489	0.468799	0.967193	0.590597	-2.46673e+19	0.455982	0.462197	0.979897
mp-559982	Na2AlZnF7	4.82261	0.556595	0.579288	0.941817	0.847489	9.39893e+19	0.557516	0.570217	0.966777	0.637804	-3.01708e+19	0.558191	0.563956	0.984706
mp-696156	Ca3Si2(H3O5)2	4.7629	0.477522	0.509421	0.907558	0.77164	7.57951e+19	0.480679	0.492123	0.965323	0.598531	-2.43862e+19	0.474632	0.478606	0.987572
mp-27526	K3InF6	5.3221	0.663663	0.690971	0.941307	0.967568	1.73153e+20	0.68452	0.701046	0.964849	0.664333	-3.85678e+19	0.638054	0.672534	0.924091
mp-697670	KAlSi3O8	4.9298	0.51472	0.5335	0.947666	0.824309	9.33741e+19	0.516437	0.529312	0.963738	0.624084	-2.76714e+19	0.513084	0.521153	0.976865
mp-39823	Na8Al6Si6CO27	3.2507	0.553379	0.599773	0.886244	0.823283	3.21727e+20	0.623924	0.639959	0.962653	0.625006	-3.13985e+19	0.546215	0.576965	0.92113
mp-23846	KHF2	6.9619	0.584503	0.601322	0.95834	0.884491	1.13132e+20	0.585561	0.60074	0.96234	0.660505	-3.36234e+19	0.583487	0.593922	0.973763
mp-676512	Na3AlF6	6.555	0.57593	0.591454	0.960887	0.884655	1.06227e+20	0.576657	0.591989	0.961404	0.658777	-3.31064e+19	0.576111	0.585312	0.976511
mp-28124	H8NF5	7.41931	0.639306	0.658843	0.955851	0.91592	1.27455e+20	0.641555	0.658624	0.961377	0.682915	-3.72906e+19	0.639419	0.649333	0.977187
mp-558891	SiO2	5.64999	0.558409	0.57324	0.961443	0.875728	1.08146e+20	0.558868	0.573903	0.960963	0.645509	-3.04635e+19	0.551511	0.566517	0.960533
mp-3384	Er3Al5O12	4.75801	1.13127	1.15385	0.970791	1.27439	3.21665e+20	1.18461	1.21708	0.960239	0.844068	-7.87166e+19	1.12563	1.14832	0.970513
mp-9839	K2LiAlF6	7.4418	0.580025	0.596233	0.959501	0.889677	1.00264e+20	0.580003	0.596425	0.958986	0.668967	-3.46365e+19	0.584188	0.592486	0.979064
mp-25772	Mn4Be3Ge3SO12	2.4229	0.235329	0.441368	0.389325	0.621658	4.36379e+20	0.488988	0.503394	0.957381	0.310231	-1.07855e+19	0.217995	0.36458	0.462359
mp-643371	K2Sn(H2N)6	2.404	0.477279	0.511378	0.901666	0.775371	8.17133e+19	0.480944	0.495164	0.957236	0.596254	-2.54581e+19	0.475339	0.48012	0.985101
mp-15549	K2LiAlF6	7.2179	0.57842	0.600251	0.945945	0.863679	1.05464e+20	0.579355	0.596498	0.957201	0.653104	-3.25001e+19	0.578827	0.588102	0.976437
mp-6586	K2NaAlF6	6.8578	0.548231	0.565023	0.955754	0.864285	9.36248e+19	0.548394	0.564666	0.957085	0.648988	-3.04798e+19	0.54866	0.560192	0.969281
mp-31488	Li3NbO4	3.77561	3.04032	2.74833	1.16352	1.89133	6.43484e+20	2.93931	3.02685	0.956935	1.44858	-2.93511e+20	3.00869	2.84487	1.08761
mp-559550	SiO2	5.5993	0.607648	0.629479	0.948433	0.892516	1.17206e+20	0.608903	0.627151	0.956673	0.660078	-3.43257e+19	0.605217	0.618962	0.966877
mp-6124	NaAl(SiO3)2	5.2252	0.445009	0.465497	0.934712	0.763108	7.71787e+19	0.446007	0.459492	0.956305	0.585756	-2.32817e+19	0.439673	0.451075	0.962325
mp-1031	GdCd	0	0.0488027	0.0129278	7.33466	6.58681	1.14797e+23	36.1824	37.2787	0.956211	0.308731	-1.13498e+23	36.5652	38.1474	0.938434
mp-554151	SiO2	5.7171	0.573801	0.59461	0.947968	0.874725	1.07e+20	0.574829	0.592283	0.956124	0.654582	-3.34597e+19	0.573025	0.583808	0.972421
mp-865934	YbF2	6.7345	0.528726	0.548717	0.945852	0.840149	9.4881e+19	0.528515	0.544708	0.95574	0.63325	-2.97832e+19	0.525954	0.536641	0.970277
mp-23155	Ar	8.5108	0.630307	0.648178	0.958931	0.926967	1.21458e+20	0.630949	0.650281	0.955739	0.680695	-3.78018e+19	0.62866	0.64292	0.966915
mp-559224	Sr3Al2Cl2O5	4.2168	0.433031	0.446704	0.954441	0.7571	8.43834e+19	0.430387	0.444001	0.95436	0.564612	-2.22046e+19	0.411174	0.43049	0.933457
mp-612118	Kr	7.1816	0.598717	0.619236	0.950709	0.904532	1.32985e+20	0.603811	0.623025	0.9541	0.654425	-3.43816e+19	0.5867	0.608156	0.947547
mp-626721	RbHO	3.34431	0.432208	0.458069	0.916523	0.742422	6.799e+19	0.431689	0.445563	0.953658	0.579563	-2.24106e+19	0.429208	0.437657	0.971183
mp-1818	SiF4	7.7173	0.700434	0.719384	0.96075	0.973772	1.34218e+20	0.699782	0.722339	0.953527	0.708943	-4.34523e+19	0.699907	0.714987	0.968531
mp-558808	LiAl(SiO3)2	4.9005	0.579304	0.608237	0.929502	0.863027	1.05114e+20	0.581551	0.600297	0.953526	0.647555	-3.21648e+19	0.579861	0.59121	0.971345
mp-6059	Cs2KYF6	6.464	0.502943	0.522599	0.944117	0.826177	8.05771e+19	0.504362	0.520683	0.953352	0.630184	-2.77709e+19	0.506208	0.517512	0.967416
mp-10492	Rb2SiF6	6.9912	0.553962	0.57229	0.952349	0.866536	9.60529e+19	0.55407	0.572092	0.95312	0.654736	-3.13122e+19	0.556493	0.566808	0.972827
mp-560399	NaMgF3	5.9262	0.562468	0.580417	0.953973	0.873703	1.02733e+20	0.562563	0.580881	0.953072	0.653724	-3.19132e+19	0.560231	0.572353	0.9684
mp-546794	SiO2	5.7034	0.562401	0.584917	0.942819	0.864679	1.00201e+20	0.563402	0.58189	0.952722	0.646511	-3.07284e+19	0.559715	0.573172	0.96499
mp-4950	KCaF3	6.13911	0.577987	0.596295	0.954301	0.885513	1.07182e+20	0.578169	0.597156	0.952689	0.658553	-3.34261e+19	0.57593	0.590049	0.964322
mp-780370	Sm3Al5O12	4.1378	1.1782	1.21088	0.959791	1.29748	3.17355e+20	1.24465	1.28585	0.952327	0.854132	-8.71161e+19	1.17255	1.20624	0.9584
mp-463	KF	5.99561	0.565068	0.583376	0.953296	0.875671	1.07985e+20	0.565571	0.584335	0.952223	0.65063	-3.21083e+19	0.560688	0.575639	0.961296
mp-8039	AlF3	7.4251	0.552453	0.570774	0.95224	0.865105	9.88053e+19	0.552435	0.570811	0.952103	0.648733	-3.0544e+19	0.550987	0.563748	0.96624
mp-10198	Mn3PdN	0	0.0669996	0.0109086	15.2215	2.48946	1.41143e+23	13.2001	13.642	0.951806	0.0347261	-1.40286e+23	13.2497	13.8546	0.935238
mp-7848	AlPO4	5.6811	0.574348	0.596678	0.944394	0.873725	1.08471e+20	0.575531	0.594921	0.95151	0.652273	-3.17865e+19	0.572374	0.586005	0.965312
mp-3448	KMgF3	6.95371	0.524173	0.54305	0.948315	0.841943	8.91497e+19	0.524186	0.541906	0.951354	0.638941	-2.91866e+19	0.525057	0.536261	0.968825
mp-755043	Al2Si2O7	5.05349	0.437771	0.464589	0.914676	0.744001	7.17266e+19	0.439095	0.453965	0.951269	0.579375	-2.24801e+19	0.434775	0.443967	0.969104
mp-600033	SiO2	5.4289	0.638374	0.659216	0.952951	0.931208	1.28007e+20	0.640573	0.662323	0.951148	0.675561	-3.77633e+19	0.63164	0.651879	0.953792
mp-867261	RbSrCO3F	4.1259	0.579918	0.604997	0.938468	0.873656	1.17048e+20	0.586146	0.606117	0.950984	0.645676	-3.30865e+19	0.576712	0.59274	0.959713
mp-2211	V3Pt	0	0.0407888	0.0195335	3.01746	1.25308	2.40127e+22	3.67752	3.80299	0.950919	0.0283394	-2.33794e+22	3.63011	3.74073	0.955973
mp-505233	Cs2Sn(H2N)6	2.5332	0.404133	0.434237	0.897833	0.710516	5.82646e+19	0.405313	0.419178	0.950797	0.555537	-2.0096e+19	0.401026	0.40872	0.971897
mp-675569	KPF6	7.1235	0.651462	0.674954	0.948248	0.922969	1.30711e+20	0.653874	0.676489	0.950276	0.68192	-3.82238e+19	0.650284	0.667601	0.961345
mp-24043	H2O	5.4552	0.543178	0.564926	0.942813	0.849549	9.74161e+19	0.54442	0.563301	0.950147	0.641247	-3.02456e+19	0.541209	0.555201	0.962437
mp-866690	La17Al4(Si3N11)3	1.8771	2.13809	1.96695	1.13331	1.50082	3.00341e+20	2.00463	2.0743	0.950048	1.36397	-1.91918e+20	2.07926	2.01516	1.04809
mp-37153	AgAsF6	1.68049	0.602312	0.623057	0.950475	0.900904	1.11486e+20	0.602567	0.624328	0.948177	0.668523	-3.4319e+19	0.600995	0.616782	0.961853
mp-10175	KCdF3	3.1252	0.46519	0.482784	0.945838	0.789246	8.14789e+19	0.463541	0.481027	0.945971	0.601516	-2.44887e+19	0.458861	0.473633	0.953583
mp-682	NaF	6.0943	0.570352	0.591452	0.946967	0.876051	1.10282e+20	0.571225	0.592856	0.945774	0.649182	-3.28382e+19	0.56414	0.582049	0.954205
mp-697168	MgH6(NCl)2	4.77401	0.431708	0.460015	0.90913	0.734066	7.06938e+19	0.430072	0.446524	0.945247	0.570475	-2.22136e+19	0.42362	0.436064	0.957502
mp-6952	YbRbF3	6.5227	0.488796	0.508953	0.941185	0.80939	8.35043e+19	0.488391	0.507233	0.944803	0.614681	-2.61104e+19	0.485796	0.501299	0.953973
mp-25766	Mn4Be3Ge3SeO12	2.2726	0.22019	0.423311	0.375151	0.591242	4.40017e+20	0.469027	0.487141	0.944745	0.303664	-1.04601e+19	0.205849	0.343991	0.462915
mp-13799	K2NaYF6	6.2541	0.571907	0.59387	0.945043	0.875432	1.0512e+20	0.572151	0.594604	0.943896	0.653667	-3.26956e+19	0.569801	0.586777	0.956918
mp-558749	RbMnF3	2.96561	0.307016	0.502417	0.477688	0.493971	1.58395e+21	0.588476	0.611583	0.943865	0.359991	-1.81713e+19	0.3026	0.491442	0.483164
mp-6509	Sr3GaO4F	3.6802	0.398457	0.435548	0.875019	0.691386	5.98583e+19	0.395977	0.411537	0.943823	0.547422	-1.96018e+19	0.390346	0.397226	0.974134
mp-3654	RbCaF3	6.3974	0.52423	0.544997	0.943393	0.837861	9.54669e+19	0.524005	0.544631	0.943734	0.630525	-2.8229e+19	0.520627	0.537268	0.9539
mp-10474	NaPF6	7.0089	0.686519	0.710853	0.949093	0.959779	1.40118e+20	0.688061	0.71531	0.943408	0.698878	-4.07463e+19	0.684462	0.704857	0.956914
mp-4368	SbPdSe	0	0.0697809	0.0163025	8.85572	1.5602	1.41717e+22	3.90351	4.05878	0.943171	0.0640127	-1.40687e+22	3.91394	4.09224	0.935362
mp-3414	AgSbF6	1.7672	0.588946	0.611551	0.945072	0.887794	1.09038e+20	0.58924	0.612737	0.943033	0.658931	-3.36762e+19	0.584573	0.603179	0.954087
mp-15079	Cs4KLiGa2F12	6.05989	0.527251	0.562867	0.906602	0.813118	8.57668e+19	0.52765	0.548758	0.94286	0.62401	-2.91585e+19	0.525854	0.536851	0.969432
mp-6951	RbCdF3	3.17449	0.443412	0.463576	0.935467	0.768779	7.18916e+19	0.442118	0.459956	0.942393	0.594172	-2.40043e+19	0.440064	0.4532	0.956836
mp-15317	Rb2NaHoF6	6.4808	0.517495	0.538478	0.942122	0.831509	9.51243e+19	0.517241	0.538194	0.942175	0.628113	-2.84003e+19	0.513908	0.530567	0.953273
mp-11718	RbF	5.5258	0.495073	0.516066	0.939607	0.812522	8.49188e+19	0.494303	0.514474	0.941771	0.615522	-2.655e+19	0.49083	0.50795	0.94987
mp-4608	KPF6	7.02061	0.660392	0.69279	0.930679	0.913538	1.24577e+20	0.662805	0.690154	0.94115	0.676561	-4.02631e+19	0.659793	0.677813	0.960386
mp-8402	RbMgF3	6.9446	0.484806	0.505893	0.938132	0.803473	8.36213e+19	0.483957	0.504074	0.94074	0.612993	-2.62665e+19	0.480987	0.496271	0.954163
mp-13926	Rb2NaYF6	6.4704	0.524947	0.5468	0.940657	0.836395	1.00073e+20	0.524955	0.546966	0.940248	0.625405	-2.82608e+19	0.51616	0.535635	0.945962
mp-28146	LiGa5O8	2.5223	0.249193	0.296944	0.768761	0.587911	2.6651e+19	0.26343	0.274545	0.93989	0.50438	-1.22025e+19	0.269188	0.27349	0.9765
mp-775393	Li2Cr3SbO8	2.81119	1.5397	1.51789	1.02163	1.43105	3.3388e+20	1.61204	1.6802	0.939771	1.01163	-1.29974e+20	1.55872	1.54101	1.01728
mp-1458	Nb3Ir	0	0.100231	0.00990387	32.1954	0.944329	2.25441e+22	2.72657	2.84213	0.939634	0.0167361	-2.25441e+22	2.72657	2.84213	0.939634
mp-34418	AgPF6	3.229	0.639593	0.664769	0.943734	0.923822	1.289e+20	0.640937	0.668197	0.939434	0.680056	-3.79199e+19	0.636921	0.65708	0.954336
mp-1939	ErNi2	0	0.0594778	0.0152953	7.66826	1.0684	3.90419e+22	3.70307	3.86063	0.93941	0.0187687	-2.50902e+21	0.668691	0.341957	2.73452
mp-21067	ScInCu2	0	0.0208582	0.00589986	6.64742	0.287763	1.14419e+22	0.660218	0.688332	0.939364	0.00250217	-1.13552e+22	0.657584	0.68504	0.940488
mp-555740	SiO2	5.5882	0.510048	0.532069	0.938567	0.823313	9.21058e+19	0.509174	0.530891	0.93927	0.622831	-2.71309e+19	0.50287	0.518838	0.954193
mp-23151	Na4BeAlSi4ClO12	4.6338	0.515218	0.53955	0.933124	0.82235	9.04725e+19	0.514939	0.536919	0.939227	0.619802	-2.80964e+19	0.508896	0.525787	0.952201
mp-21989	Ca3Sc2(GeO4)3	3.4667	0.451733	0.527277	0.792985	0.740245	3.86746e+20	0.580326	0.605185	0.939022	0.558294	-2.32344e+19	0.434289	0.483948	0.8501
mp-14161	Sr4Al6SO16	4.3936	0.477723	0.499984	0.933964	0.796169	7.97068e+19	0.476707	0.497213	0.938779	0.60766	-2.64427e+19	0.472421	0.488614	0.950701
mp-8874	LiSiBO4	6.4208	0.583362	0.618694	0.915574	0.861006	1.04638e+20	0.585139	0.610342	0.938704	0.646493	-3.39272e+19	0.579891	0.596623	0.958231
mp-3347	Be2SiO4	5.8191	0.516063	0.546616	0.91734	0.809574	9.24242e+19	0.516465	0.538769	0.938549	0.617119	-2.89172e+19	0.509623	0.526545	0.952183
mp-5878	KZnF3	3.7137	0.452659	0.473991	0.933257	0.774117	7.29712e+19	0.450959	0.470484	0.938401	0.595118	-2.4179e+19	0.44728	0.462731	0.950332
mp-7483	KHgF3	0.643304	0.361025	0.383532	0.913281	0.690756	5.09844e+19	0.359413	0.375059	0.938083	0.547813	-1.79104e+19	0.357614	0.369317	0.952847
mp-779689	H3N	3.7337	0.599557	0.624489	0.940715	0.893342	1.1673e+20	0.600693	0.626944	0.937854	0.664102	-3.42193e+19	0.596269	0.614909	0.954877
mp-696735	H2O	5.469	0.532002	0.560944	0.923613	0.834553	8.18318e+19	0.533255	0.556715	0.93746	0.643672	-2.91153e+19	0.537605	0.550665	0.964638
mp-23657	Na6S2ClO8F	4.783	0.554562	0.580362	0.934066	0.856422	9.26133e+19	0.554895	0.579576	0.936808	0.65232	-3.16479e+19	0.55808	0.573223	0.960636
mp-14150	Ca4Al6SO16	4.6703	0.490102	0.513426	0.932638	0.805439	8.3155e+19	0.489331	0.51116	0.936632	0.614832	-2.76089e+19	0.486154	0.502605	0.951306
mp-8399	CsCdF3	3.3082	0.424203	0.445998	0.927602	0.748322	6.7019e+19	0.422365	0.441214	0.936608	0.581622	-2.23233e+19	0.41934	0.433746	0.950597
mp-13820	Cd3SiO5	0.967895	0.259493	0.300595	0.802077	0.551314	2.87724e+19	0.254605	0.265969	0.936598	0.462274	-1.11978e+19	0.251783	0.257572	0.966474
mp-16180	Na6S2O9	2.97639	0.511079	0.534684	0.934514	0.822414	9.03512e+19	0.510494	0.533512	0.935986	0.622524	-2.83154e+19	0.506166	0.524538	0.947925
mp-561260	Na2CaP2O7	4.95089	0.526785	0.559949	0.912489	0.808124	9.05445e+19	0.52917	0.553221	0.935503	0.621832	-2.9501e+19	0.527075	0.54247	0.957735
mp-14070	RbAlO2	3.3693	0.400945	0.42241	0.924752	0.726398	6.15005e+19	0.398848	0.417102	0.935078	0.567606	-2.0521e+19	0.395625	0.410387	0.946531
mp-5078	SrZnF4	5.0649	0.580842	0.610667	0.927643	0.859504	1.08595e+20	0.582	0.60867	0.935	0.65224	-3.36549e+19	0.582979	0.595879	0.967704
mp-6945	SiO2	5.5482	0.52799	0.558704	0.918682	0.826951	9.04421e+19	0.529389	0.554	0.934109	0.635605	-2.9379e+19	0.530636	0.544698	0.961527
mp-9212	NaAlO2	3.8007	0.427725	0.456005	0.908433	0.741024	7.58868e+19	0.430192	0.450345	0.933632	0.575487	-2.31902e+19	0.426125	0.441932	0.946831
mp-7029	SiO2	5.50879	0.538441	0.570504	0.916893	0.834032	9.04905e+19	0.539672	0.565181	0.933071	0.63997	-2.89553e+19	0.541601	0.555382	0.963012
mp-3536	MgAl2O4	5.1111	0.384415	0.408943	0.911395	0.710639	5.61619e+19	0.383309	0.401521	0.932739	0.560551	-1.97007e+19	0.381165	0.394999	0.947926
mp-554089	SiO2	5.6604	0.536983	0.567961	0.919313	0.828719	8.89757e+19	0.538813	0.564611	0.932252	0.640224	-3.04451e+19	0.541304	0.557105	0.957759
mp-546711	CsClO4	5.3068	0.58991	0.617638	0.933422	0.880518	1.04732e+20	0.589911	0.618411	0.931673	0.659663	-3.39076e+19	0.58878	0.60993	0.94844
mp-774361	Li2Mn3F8	3.5254	0.382172	0.64207	0.459215	0.575884	1.14246e+21	0.624571	0.655046	0.931033	0.366065	-1.98661e+19	0.344784	0.584524	0.453021
mp-558022	SrBPO5	5.3837	0.50666	0.536686	0.917265	0.810732	8.40959e+19	0.508377	0.533189	0.931015	0.621904	-2.92236e+19	0.506895	0.524361	0.950454
mp-13815	Rb2NaErF6	6.49841	0.512879	0.53819	0.930291	0.820649	9.05997e+19	0.511962	0.536963	0.930979	0.623617	-2.83877e+19	0.509277	0.528302	0.946472
mp-19870	GaFe3	0	0.0748794	0.0130376	13.764	1.16109	8.73419e+22	5.28961	5.54929	0.930635	0.0173677	-1.03431e+22	1.6418	1.22419	1.55314
mp-7482	RbHgF3	0.652407	0.35301	0.375815	0.910376	0.680365	5.34062e+19	0.352138	0.369483	0.930417	0.532551	-1.84033e+19	0.347145	0.365027	0.927423
mp-756933	TaTlO3	0.460104	0.361198	0.384163	0.911686	0.687126	5.54548e+19	0.359405	0.377221	0.929999	0.523121	-2.02107e+19	0.350112	0.368462	0.926234
mp-690684	Na2BH4ClO4	4.5838	0.495332	0.531807	0.898905	0.787575	8.86916e+19	0.502225	0.527123	0.929995	0.61182	-2.7806e+19	0.497957	0.513647	0.954532
mp-8876	Ca4Al6SO12	3.72669	0.45055	0.476045	0.920753	0.768236	7.36272e+19	0.449658	0.4721	0.929548	0.594583	-2.44759e+19	0.447112	0.464023	0.945836
mp-7531	Ca4Al6O13	3.9435	0.476841	0.502609	0.924092	0.789743	7.84087e+19	0.475479	0.499247	0.929447	0.606412	-2.57761e+19	0.472007	0.489954	0.945562
mp-13190	KRb2GaF6	5.8895	0.536709	0.563915	0.928513	0.838814	9.42726e+19	0.53638	0.563205	0.929412	0.634378	-2.89031e+19	0.532354	0.552091	0.946856
mp-14099	ZnAgF3	1.61329	0.421247	0.447786	0.91243	0.741956	6.3641e+19	0.420083	0.441125	0.929309	0.578945	-2.21969e+19	0.417993	0.43424	0.944406
mp-557456	Li4Al3Ge3IO12	3.1218	0.524111	0.550836	0.928112	0.828965	1.1177e+20	0.526485	0.552941	0.929096	0.603909	-2.93674e+19	0.502132	0.533643	0.912746
mp-13634	Cs2LiAl3F12	7.0876	0.512009	0.53866	0.926711	0.817763	9.34778e+19	0.511424	0.537279	0.928694	0.618769	-2.7684e+19	0.506018	0.525929	0.943755
mp-27843	Zn2Ge3O8	2.3392	0.249331	0.298807	0.762217	0.582675	2.71134e+19	0.262188	0.275448	0.928665	0.497686	-1.25453e+19	0.267072	0.274525	0.959554
mp-241	CdF2	2.8997	0.392168	0.418674	0.906555	0.714865	5.79712e+19	0.390558	0.410547	0.927861	0.56369	-2.03535e+19	0.388693	0.403799	0.944413
mp-675011	CsPF6	7.14291	0.633737	0.667765	0.924547	0.896072	1.21492e+20	0.63546	0.66825	0.927308	0.667528	-3.72142e+19	0.629709	0.654458	0.943814
mp-7886	Cs2RbYF6	6.2112	0.502361	0.528192	0.927548	0.809728	9.65536e+19	0.501771	0.527737	0.92711	0.604996	-2.77172e+19	0.487687	0.512806	0.92743
mp-6486	SrBPO5	5.38189	0.509119	0.538739	0.918675	0.812114	8.66968e+19	0.509571	0.53606	0.926801	0.620424	-2.84197e+19	0.506598	0.524903	0.948148
mp-865095	NaGaH8(NF3)2	5.8536	0.577779	0.607332	0.927905	0.86874	1.03122e+20	0.577939	0.608002	0.926757	0.653268	-3.34953e+19	0.574619	0.596024	0.946618
mp-550759	RbClO4	5.2142	0.596663	0.627182	0.927904	0.883319	1.12769e+20	0.597783	0.629361	0.925688	0.656095	-3.4932e+19	0.590789	0.616108	0.938995
mp-626729	Ga(HO)3	3.91619	0.383818	0.416572	0.884406	0.688471	5.4557e+19	0.379747	0.399915	0.925314	0.54843	-1.88678e+19	0.376264	0.390422	0.946101
mp-770601	Fe2HgO4	1.1479	0.271713	0.348465	0.688537	1.09781	2.42311e+21	1.56677	1.65007	0.925241	0.44421	-1.19594e+19	0.252079	0.28772	0.820069
mp-753315	Mg3ZnO4	3.1534	0.312927	0.344789	0.864638	0.615519	3.92077e+19	0.307017	0.323376	0.925085	0.500982	-1.44962e+19	0.304641	0.31698	0.94218
mp-4051	AlPO4	5.475	0.553543	0.588056	0.913269	0.83909	9.57815e+19	0.554255	0.583795	0.92507	0.636108	-3.10706e+19	0.55364	0.575779	0.942884
mp-13816	Cs2NaErF6	6.864	0.471122	0.496786	0.92352	0.782403	8.33518e+19	0.469357	0.494384	0.925035	0.600919	-2.48693e+19	0.463839	0.483086	0.940835
mp-774425	FeSb3(PO4)6	1.84661	0.515281	0.551294	0.903631	0.796299	8.96811e+19	0.516193	0.543861	0.924667	0.620096	-2.94472e+19	0.51994	0.52951	0.973013
mp-6528	Cs2NaAlF6	6.69	0.481825	0.515532	0.903546	0.775167	7.96947e+19	0.483815	0.509833	0.924438	0.605884	-2.60478e+19	0.480309	0.497967	0.947284
mp-546633	KClO4	5.128	0.615184	0.648242	0.924491	0.896189	1.25092e+20	0.61827	0.652566	0.922212	0.659321	-3.45727e+19	0.606058	0.634753	0.932962
mp-2030	RuS2	0.666801	0.395775	0.451487	0.820739	1.20223	7.72528e+21	2.49004	2.62825	0.922167	0.547572	-1.97639e+19	0.387432	0.419213	0.888466
mp-22862	NaCl	5.0033	0.417037	0.443369	0.912251	0.73379	6.50287e+19	0.414645	0.437662	0.92216	0.57255	-2.1599e+19	0.41098	0.429504	0.936009
mp-8877	Sr4Al6SO12	3.3444	0.439905	0.46634	0.916189	0.753161	7.13457e+19	0.43694	0.461304	0.921833	0.582945	-2.38337e+19	0.431758	0.451296	0.935768
mp-556968	RbNa3SnO4	2.2521	0.431201	0.47753	0.858062	0.705225	1.88232e+20	0.474635	0.50114	0.921725	0.549437	-2.15464e+19	0.412886	0.440643	0.907018
mp-23251	KBr	4.3102	0.406474	0.435398	0.902029	0.724501	5.95635e+19	0.405197	0.427846	0.921655	0.570202	-2.06246e+19	0.403311	0.420579	0.939052
mp-6073	Mg3Al2(SiO4)3	4.94029	0.393556	0.420869	0.904252	0.713137	6.03292e+19	0.391869	0.413779	0.921633	0.562955	-2.0043e+19	0.388445	0.404716	0.940308
mp-8041	Rb2S	1.9684	0.359814	0.389683	0.887257	0.679501	4.8435e+19	0.356943	0.377014	0.921217	0.543909	-1.78262e+19	0.355877	0.371105	0.939082
mp-561947	CsHgF3	0.756395	0.340331	0.365706	0.897748	0.65957	4.68618e+19	0.335709	0.354673	0.920876	0.530714	-1.65064e+19	0.333175	0.347077	0.940523
mp-7604	Mg3NF3	3.5817	0.400052	0.42656	0.908246	0.717196	6.14529e+19	0.396938	0.419443	0.920606	0.562047	-2.04668e+19	0.392109	0.410301	0.934236
mp-721851	BHO2	7.0739	0.64017	0.718637	0.840773	0.911952	3.82922e+20	0.755931	0.798826	0.920545	0.640502	-3.75119e+19	0.624909	0.689441	0.862939
mp-29145	H3N	4.32871	0.538681	0.570864	0.916639	0.834169	8.99791e+19	0.538641	0.569337	0.920228	0.639361	-3.08646e+19	0.539766	0.560246	0.945672
mp-7104	CsCaF3	6.89541	0.468304	0.498982	0.909211	0.776842	7.3449e+19	0.466899	0.493513	0.92021	0.605182	-2.52191e+19	0.465583	0.482928	0.946613
mp-2250	ZrNi2	0	0.0215539	0.011625	2.52465	1.63573	1.23651e+23	8.44967	8.93566	0.919537	0.0173528	-2.22969e+22	2.7163	2.23983	1.33551
mp-754826	CsScO2	2.95961	0.419306	0.44783	0.906	0.734644	6.55571e+19	0.417309	0.441367	0.919365	0.573801	-2.16889e+19	0.41356	0.432478	0.935109
mp-559520	In2Ag3(PO4)3	0.988494	0.392169	0.431348	0.866898	0.689785	5.51383e+19	0.390115	0.412667	0.919155	0.55417	-2.01277e+19	0.389241	0.403438	0.947684
mp-15312	Ca4Al6TeO12	3.1458	0.407965	0.437842	0.89941	0.724503	6.09908e+19	0.406658	0.43032	0.918664	0.570037	-2.12429e+19	0.403656	0.421578	0.936914
mp-2632	TlF3	1.256	0.339375	0.379999	0.844005	0.625599	4.27618e+19	0.335394	0.354912	0.918651	0.507832	-1.65824e+19	0.330982	0.346023	0.935515
mp-14038	Rb2NaRhF6	1.9531	3.91051	3.57134	1.14579	2.02768	8.17603e+20	3.71345	3.93053	0.918311	1.60608	-3.93904e+20	3.83621	3.71708	1.04846
mp-696965	TbCs3F6	5.7523	0.499732	0.528871	0.918502	0.802086	9.82912e+19	0.4994	0.528721	0.91798	0.59964	-2.67064e+19	0.483172	0.511834	0.917189
mp-625392	Lu(HO)3	4.9588	0.462502	0.494785	0.903744	0.761797	7.52964e+19	0.460585	0.487789	0.917521	0.59313	-2.46663e+19	0.45751	0.476545	0.940686
mp-5046	BeSO4	6.92571	0.638319	0.677033	0.915465	0.901838	1.20111e+20	0.64112	0.679055	0.917383	0.66946	-3.62311e+19	0.635488	0.663701	0.936919
mp-643394	NaInH8(NF3)2	5.0085	0.579336	0.613332	0.91802	0.863554	1.0278e+20	0.579466	0.613992	0.916849	0.64977	-3.32677e+19	0.576018	0.602349	0.935152
mp-625468	Lu(HO)3	5.0247	0.46147	0.493092	0.905364	0.766201	7.58366e+19	0.459981	0.487404	0.916802	0.593439	-2.50797e+19	0.455735	0.477216	0.933246
mp-11327	Rb2Se	1.79679	0.335409	0.365103	0.880522	0.652096	4.33885e+19	0.330962	0.350787	0.916436	0.52636	-1.59717e+19	0.329042	0.344331	0.934141
#REF!	#REF!	#REF!	#REF!	#REF!	#REF!	#REF!	#REF!	#REF!	#REF!	#REF!	#REF!	#REF!	#REF!	#REF!	#REF!
#REF!	#REF!	#REF!	#REF!	#REF!	#REF!	#REF!	#REF!	#REF!	#REF!	#REF!	#REF!	#REF!	#REF!	#REF!	#REF!
#REF!	#REF!	#REF!	#REF!	#REF!	#REF!	#REF!	#REF!	#REF!	#REF!	#REF!	#REF!	#REF!	#REF!	#REF!	#REF!
#REF!	#REF!	#REF!	#REF!	#REF!	#REF!	#REF!	#REF!	#REF!	#REF!	#REF!	#REF!	#REF!	#REF!	#REF!	#REF!
mp-27839	K2TiCl6	2.0826	6.58663	6.25256	1.0812	2.37273	1.50981e+21	6.09959	6.88355	0.834126	1.97006	-8.37504e+20	6.33648	6.57591	0.945885
#REF!	#REF!	#REF!	#REF!	#REF!	#REF!	#REF!	#REF!	#REF!	#REF!	#REF!	#REF!	#REF!	#REF!	#REF!	#REF!
#REF!	#REF!	#REF!	#REF!	#REF!	#REF!	#REF!	#REF!	#REF!	#REF!	#REF!	#REF!	#REF!	#REF!	#REF!	#REF!
#REF!	#REF!	#REF!	#REF!	#REF!	#REF!	#REF!	#REF!	#REF!	#REF!	#REF!	#REF!	#REF!	#REF!	#REF!	#REF!
#REF!	#REF!	#REF!	#REF!	#REF!	#REF!	#REF!	#REF!	#REF!	#REF!	#REF!	#REF!	#REF!	#REF!	#REF!	#REF!
#REF!	#REF!	#REF!	#REF!	#REF!	#REF!	#REF!	#REF!	#REF!	#REF!	#REF!	#REF!	#REF!	#REF!	#REF!	#REF!
#REF!	#REF!	#REF!	#REF!	#REF!	#REF!	#REF!	#REF!	#REF!	#REF!	#REF!	#REF!	#REF!	#REF!	#REF!	#REF!
#REF!	#REF!	#REF!	#REF!	#REF!	#REF!	#REF!	#REF!	#REF!	#REF!	#REF!	#REF!	#REF!	#REF!	#REF!	#REF!
#REF!	#REF!	#REF!	#REF!	#REF!	#REF!	#REF!	#REF!	#REF!	#REF!	#REF!	#REF!	#REF!	#REF!	#REF!	#REF!
#REF!	#REF!	#REF!	#REF!	#REF!	#REF!	#REF!	#REF!	#REF!	#REF!	#REF!	#REF!	#REF!	#REF!	#REF!	#REF!
#REF!	#REF!	#REF!	#REF!	#REF!	#REF!	#REF!	#REF!	#REF!	#REF!	#REF!	#REF!	#REF!	#REF!	#REF!	#REF!
#REF!	#REF!	#REF!	#REF!	#REF!	#REF!	#REF!	#REF!	#REF!	#REF!	#REF!	#REF!	#REF!	#REF!	#REF!	#REF!
#REF!	#REF!	#REF!	#REF!	#REF!	#REF!	#REF!	#REF!	#REF!	#REF!	#REF!	#REF!	#REF!	#REF!	#REF!	#REF!
#REF!	#REF!	#REF!	#REF!	#REF!	#REF!	#REF!	#REF!	#REF!	#REF!	#REF!	#REF!	#REF!	#REF!	#REF!	#REF!
#REF!	#REF!	#REF!	#REF!	#REF!	#REF!	#REF!	#REF!	#REF!	#REF!	#REF!	#REF!	#REF!	#REF!	#REF!	#REF!
#REF!	#REF!	#REF!	#REF!	#REF!	#REF!	#REF!	#REF!	#REF!	#REF!	#REF!	#REF!	#REF!	#REF!	#REF!	#REF!
#REF!	#REF!	#REF!	#REF!	#REF!	#REF!	#REF!	#REF!	#REF!	#REF!	#REF!	#REF!	#REF!	#REF!	#REF!	#REF!
#REF!	#REF!	#REF!	#REF!	#REF!	#REF!	#REF!	#REF!	#REF!	#REF!	#REF!	#REF!	#REF!	#REF!	#REF!	#REF!
#REF!	#REF!	#REF!	#REF!	#REF!	#REF!	#REF!	#REF!	#REF!	#REF!	#REF!	#REF!	#REF!	#REF!	#REF!	#REF!
#REF!	#REF!	#REF!	#REF!	#REF!	#REF!	#REF!	#REF!	#REF!	#REF!	#REF!	#REF!	#REF!	#REF!	#REF!	#REF!
#REF!	#REF!	#REF!	#REF!	#REF!	#REF!	#REF!	#REF!	#REF!	#REF!	#REF!	#REF!	#REF!	#REF!	#REF!	#REF!
#REF!	#REF!	#REF!	#REF!	#REF!	#REF!	#REF!	#REF!	#REF!	#REF!	#REF!	#REF!	#REF!	#REF!	#REF!	#REF!
#REF!	#REF!	#REF!	#REF!	#REF!	#REF!	#REF!	#REF!	#REF!	#REF!	#REF!	#REF!	#REF!	#REF!	#REF!	#REF!
#REF!	#REF!	#REF!	#REF!	#REF!	#REF!	#REF!	#REF!	#REF!	#REF!	#REF!	#REF!	#REF!	#REF!	#REF!	#REF!
#REF!	#REF!	#REF!	#REF!	#REF!	#REF!	#REF!	#REF!	#REF!	#REF!	#REF!	#REF!	#REF!	#REF!	#REF!	#REF!
#REF!	#REF!	#REF!	#REF!	#REF!	#REF!	#REF!	#REF!	#REF!	#REF!	#REF!	#REF!	#REF!	#REF!	#REF!	#REF!
#REF!	#REF!	#REF!	#REF!	#REF!	#REF!	#REF!	#REF!	#REF!	#REF!	#REF!	#REF!	#REF!	#REF!	#REF!	#REF!
#REF!	#REF!	#REF!	#REF!	#REF!	#REF!	#REF!	#REF!	#REF!	#REF!	#REF!	#REF!	#REF!	#REF!	#REF!	#REF!
#REF!	#REF!	#REF!	#REF!	#REF!	#REF!	#REF!	#REF!	#REF!	#REF!	#REF!	#REF!	#REF!	#REF!	#REF!	#REF!
#REF!	#REF!	#REF!	#REF!	#REF!	#REF!	#REF!	#REF!	#REF!	#REF!	#REF!	#REF!	#REF!	#REF!	#REF!	#REF!
#REF!	#REF!	#REF!	#REF!	#REF!	#REF!	#REF!	#REF!	#REF!	#REF!	#REF!	#REF!	#REF!	#REF!	#REF!	#REF!
#REF!	#REF!	#REF!	#REF!	#REF!	#REF!	#REF!	#REF!	#REF!	#REF!	#REF!	#REF!	#REF!	#REF!	#REF!	#REF!
#REF!	#REF!	#REF!	#REF!	#REF!	#REF!	#REF!	#REF!	#REF!	#REF!	#REF!	#REF!	#REF!	#REF!	#REF!	#REF!
#REF!	#REF!	#REF!	#REF!	#REF!	#REF!	#REF!	#REF!	#REF!	#REF!	#REF!	#REF!	#REF!	#REF!	#REF!	#REF!
#REF!	#REF!	#REF!	#REF!	#REF!	#REF!	#REF!	#REF!	#REF!	#REF!	#REF!	#REF!	#REF!	#REF!	#REF!	#REF!
#REF!	#REF!	#REF!	#REF!	#REF!	#REF!	#REF!	#REF!	#REF!	#REF!	#REF!	#REF!	#REF!	#REF!	#REF!	#REF!
#REF!	#REF!	#REF!	#REF!	#REF!	#REF!	#REF!	#REF!	#REF!	#REF!	#REF!	#REF!	#REF!	#REF!	#REF!	#REF!
#REF!	#REF!	#REF!	#REF!	#REF!	#REF!	#REF!	#REF!	#REF!	#REF!	#REF!	#REF!	#REF!	#REF!	#REF!	#REF!
#REF!	#REF!	#REF!	#REF!	#REF!	#REF!	#REF!	#REF!	#REF!	#REF!	#REF!	#REF!	#REF!	#REF!	#REF!	#REF!
#REF!	#REF!	#REF!	#REF!	#REF!	#REF!	#REF!	#REF!	#REF!	#REF!	#REF!	#REF!	#REF!	#REF!	#REF!	#REF!
#REF!	#REF!	#REF!	#REF!	#REF!	#REF!	#REF!	#REF!	#REF!	#REF!	#REF!	#REF!	#REF!	#REF!	#REF!	#REF!
#REF!	#REF!	#REF!	#REF!	#REF!	#REF!	#REF!	#REF!	#REF!	#REF!	#REF!	#REF!	#REF!	#REF!	#REF!	#REF!
#REF!	#REF!	#REF!	#REF!	#REF!	#REF!	#REF!	#REF!	#REF!	#REF!	#REF!	#REF!	#REF!	#REF!	#REF!	#REF!
#REF!	#REF!	#REF!	#REF!	#REF!	#REF!	#REF!	#REF!	#REF!	#REF!	#REF!	#REF!	#REF!	#REF!	#REF!	#REF!
#REF!	#REF!	#REF!	#REF!	#REF!	#REF!	#REF!	#REF!	#REF!	#REF!	#REF!	#REF!	#REF!	#REF!	#REF!	#REF!
#REF!	#REF!	#REF!	#REF!	#REF!	#REF!	#REF!	#REF!	#REF!	#REF!	#REF!	#REF!	#REF!	#REF!	#REF!	#REF!
#REF!	#REF!	#REF!	#REF!	#REF!	#REF!	#REF!	#REF!	#REF!	#REF!	#REF!	#REF!	#REF!	#REF!	#REF!	#REF!
#REF!	#REF!	#REF!	#REF!	#REF!	#REF!	#REF!	#REF!	#REF!	#REF!	#REF!	#REF!	#REF!	#REF!	#REF!	#REF!
#REF!	#REF!	#REF!	#REF!	#REF!	#REF!	#REF!	#REF!	#REF!	#REF!	#REF!	#REF!	#REF!	#REF!	#REF!	#REF!
#REF!	#REF!	#REF!	#REF!	#REF!	#REF!	#REF!	#REF!	#REF!	#REF!	#REF!	#REF!	#REF!	#REF!	#REF!	#REF!
#REF!	#REF!	#REF!	#REF!	#REF!	#REF!	#REF!	#REF!	#REF!	#REF!	#REF!	#REF!	#REF!	#REF!	#REF!	#REF!
#REF!	#REF!	#REF!	#REF!	#REF!	#REF!	#REF!	#REF!	#REF!	#REF!	#REF!	#REF!	#REF!	#REF!	#REF!	#REF!
#REF!	#REF!	#REF!	#REF!	#REF!	#REF!	#REF!	#REF!	#REF!	#REF!	#REF!	#REF!	#REF!	#REF!	#REF!	#REF!
#REF!	#REF!	#REF!	#REF!	#REF!	#REF!	#REF!	#REF!	#REF!	#REF!	#REF!	#REF!	#REF!	#REF!	#REF!	#REF!
#REF!	#REF!	#REF!	#REF!	#REF!	#REF!	#REF!	#REF!	#REF!	#REF!	#REF!	#REF!	#REF!	#REF!	#REF!	#REF!
#REF!	#REF!	#REF!	#REF!	#REF!	#REF!	#REF!	#REF!	#REF!	#REF!	#REF!	#REF!	#REF!	#REF!	#REF!	#REF!
#REF!	#REF!	#REF!	#REF!	#REF!	#REF!	#REF!	#REF!	#REF!	#REF!	#REF!	#REF!	#REF!	#REF!	#REF!	#REF!
#REF!	#REF!	#REF!	#REF!	#REF!	#REF!	#REF!	#REF!	#REF!	#REF!	#REF!	#REF!	#REF!	#REF!	#REF!	#REF!
#REF!	#REF!	#REF!	#REF!	#REF!	#REF!	#REF!	#REF!	#REF!	#REF!	#REF!	#REF!	#REF!	#REF!	#REF!	#REF!
#REF!	#REF!	#REF!	#REF!	#REF!	#REF!	#REF!	#REF!	#REF!	#REF!	#REF!	#REF!	#REF!	#REF!	#REF!	#REF!
#REF!	#REF!	#REF!	#REF!	#REF!	#REF!	#REF!	#REF!	#REF!	#REF!	#REF!	#REF!	#REF!	#REF!	#REF!	#REF!
#REF!	#REF!	#REF!	#REF!	#REF!	#REF!	#REF!	#REF!	#REF!	#REF!	#REF!	#REF!	#REF!	#REF!	#REF!	#REF!
#REF!	#REF!	#REF!	#REF!	#REF!	#REF!	#REF!	#REF!	#REF!	#REF!	#REF!	#REF!	#REF!	#REF!	#REF!	#REF!
#REF!	#REF!	#REF!	#REF!	#REF!	#REF!	#REF!	#REF!	#REF!	#REF!	#REF!	#REF!	#REF!	#REF!	#REF!	#REF!
#REF!	#REF!	#REF!	#REF!	#REF!	#REF!	#REF!	#REF!	#REF!	#REF!	#REF!	#REF!	#REF!	#REF!	#REF!	#REF!
#REF!	#REF!	#REF!	#REF!	#REF!	#REF!	#REF!	#REF!	#REF!	#REF!	#REF!	#REF!	#REF!	#REF!	#REF!	#REF!
#REF!	#REF!	#REF!	#REF!	#REF!	#REF!	#REF!	#REF!	#REF!	#REF!	#REF!	#REF!	#REF!	#REF!	#REF!	#REF!
#REF!	#REF!	#REF!	#REF!	#REF!	#REF!	#REF!	#REF!	#REF!	#REF!	#REF!	#REF!	#REF!	#REF!	#REF!	#REF!
#REF!	#REF!	#REF!	#REF!	#REF!	#REF!	#REF!	#REF!	#REF!	#REF!	#REF!	#REF!	#REF!	#REF!	#REF!	#REF!
#REF!	#REF!	#REF!	#REF!	#REF!	#REF!	#REF!	#REF!	#REF!	#REF!	#REF!	#REF!	#REF!	#REF!	#REF!	#REF!
#REF!	#REF!	#REF!	#REF!	#REF!	#REF!	#REF!	#REF!	#REF!	#REF!	#REF!	#REF!	#REF!	#REF!	#REF!	#REF!
#REF!	#REF!	#REF!	#REF!	#REF!	#REF!	#REF!	#REF!	#REF!	#REF!	#REF!	#REF!	#REF!	#REF!	#REF!	#REF!
#REF!	#REF!	#REF!	#REF!	#REF!	#REF!	#REF!	#REF!	#REF!	#REF!	#REF!	#REF!	#REF!	#REF!	#REF!	#REF!
#REF!	#REF!	#REF!	#REF!	#REF!	#REF!	#REF!	#REF!	#REF!	#REF!	#REF!	#REF!	#REF!	#REF!	#REF!	#REF!
#REF!	#REF!	#REF!	#REF!	#REF!	#REF!	#REF!	#REF!	#REF!	#REF!	#REF!	#REF!	#REF!	#REF!	#REF!	#REF!
#REF!	#REF!	#REF!	#REF!	#REF!	#REF!	#REF!	#REF!	#REF!	#REF!	#REF!	#REF!	#REF!	#REF!	#REF!	#REF!
#REF!	#REF!	#REF!	#REF!	#REF!	#REF!	#REF!	#REF!	#REF!	#REF!	#REF!	#REF!	#REF!	#REF!	#REF!	#REF!
#REF!	#REF!	#REF!	#REF!	#REF!	#REF!	#REF!	#REF!	#REF!	#REF!	#REF!	#REF!	#REF!	#REF!	#REF!	#REF!
#REF!	#REF!	#REF!	#REF!	#REF!	#REF!	#REF!	#REF!	#REF!	#REF!	#REF!	#REF!	#REF!	#REF!	#REF!	#REF!
#REF!	#REF!	#REF!	#REF!	#REF!	#REF!	#REF!	#REF!	#REF!	#REF!	#REF!	#REF!	#REF!	#REF!	#REF!	#REF!
#REF!	#REF!	#REF!	#REF!	#REF!	#REF!	#REF!	#REF!	#REF!	#REF!	#REF!	#REF!	#REF!	#REF!	#REF!	#REF!
#REF!	#REF!	#REF!	#REF!	#REF!	#REF!	#REF!	#REF!	#REF!	#REF!	#REF!	#REF!	#REF!	#REF!	#REF!	#REF!
#REF!	#REF!	#REF!	#REF!	#REF!	#REF!	#REF!	#REF!	#REF!	#REF!	#REF!	#REF!	#REF!	#REF!	#REF!	#REF!
#REF!	#REF!	#REF!	#REF!	#REF!	#REF!	#REF!	#REF!	#REF!	#REF!	#REF!	#REF!	#REF!	#REF!	#REF!	#REF!
#REF!	#REF!	#REF!	#REF!	#REF!	#REF!	#REF!	#REF!	#REF!	#REF!	#REF!	#REF!	#REF!	#REF!	#REF!	#REF!
#REF!	#REF!	#REF!	#REF!	#REF!	#REF!	#REF!	#REF!	#REF!	#REF!	#REF!	#REF!	#REF!	#REF!	#REF!	#REF!
#REF!	#REF!	#REF!	#REF!	#REF!	#REF!	#REF!	#REF!	#REF!	#REF!	#REF!	#REF!	#REF!	#REF!	#REF!	#REF!
#REF!	#REF!	#REF!	#REF!	#REF!	#REF!	#REF!	#REF!	#REF!	#REF!	#REF!	#REF!	#REF!	#REF!	#REF!	#REF!
#REF!	#REF!	#REF!	#REF!	#REF!	#REF!	#REF!	#REF!	#REF!	#REF!	#REF!	#REF!	#REF!	#REF!	#REF!	#REF!
#REF!	#REF!	#REF!	#REF!	#REF!	#REF!	#REF!	#REF!	#REF!	#REF!	#REF!	#REF!	#REF!	#REF!	#REF!	#REF!
#REF!	#REF!	#REF!	#REF!	#REF!	#REF!	#REF!	#REF!	#REF!	#REF!	#REF!	#REF!	#REF!	#REF!	#REF!	#REF!
#REF!	#REF!	#REF!	#REF!	#REF!	#REF!	#REF!	#REF!	#REF!	#REF!	#REF!	#REF!	#REF!	#REF!	#REF!	#REF!
#REF!	#REF!	#REF!	#REF!	#REF!	#REF!	#REF!	#REF!	#REF!	#REF!	#REF!	#REF!	#REF!	#REF!	#REF!	#REF!
#REF!	#REF!	#REF!	#REF!	#REF!	#REF!	#REF!	#REF!	#REF!	#REF!	#REF!	#REF!	#REF!	#REF!	#REF!	#REF!
#REF!	#REF!	#REF!	#REF!	#REF!	#REF!	#REF!	#REF!	#REF!	#REF!	#REF!	#REF!	#REF!	#REF!	#REF!	#REF!
#REF!	#REF!	#REF!	#REF!	#REF!	#REF!	#REF!	#REF!	#REF!	#REF!	#REF!	#REF!	#REF!	#REF!	#REF!	#REF!
#REF!	#REF!	#REF!	#REF!	#REF!	#REF!	#REF!	#REF!	#REF!	#REF!	#REF!	#REF!	#REF!	#REF!	#REF!	#REF!
#REF!	#REF!	#REF!	#REF!	#REF!	#REF!	#REF!	#REF!	#REF!	#REF!	#REF!	#REF!	#REF!	#REF!	#REF!	#REF!
#REF!	#REF!	#REF!	#REF!	#REF!	#REF!	#REF!	#REF!	#REF!	#REF!	#REF!	#REF!	#REF!	#REF!	#REF!	#REF!
#REF!	#REF!	#REF!	#REF!	#REF!	#REF!	#REF!	#REF!	#REF!	#REF!	#REF!	#REF!	#REF!	#REF!	#REF!	#REF!
#REF!	#REF!	#REF!	#REF!	#REF!	#REF!	#REF!	#REF!	#REF!	#REF!	#REF!	#REF!	#REF!	#REF!	#REF!	#REF!
#REF!	#REF!	#REF!	#REF!	#REF!	#REF!	#REF!	#REF!	#REF!	#REF!	#REF!	#REF!	#REF!	#REF!	#REF!	#REF!
#REF!	#REF!	#REF!	#REF!	#REF!	#REF!	#REF!	#REF!	#REF!	#REF!	#REF!	#REF!	#REF!	#REF!	#REF!	#REF!
#REF!	#REF!	#REF!	#REF!	#REF!	#REF!	#REF!	#REF!	#REF!	#REF!	#REF!	#REF!	#REF!	#REF!	#REF!	#REF!
#REF!	#REF!	#REF!	#REF!	#REF!	#REF!	#REF!	#REF!	#REF!	#REF!	#REF!	#REF!	#REF!	#REF!	#REF!	#REF!
#REF!	#REF!	#REF!	#REF!	#REF!	#REF!	#REF!	#REF!	#REF!	#REF!	#REF!	#REF!	#REF!	#REF!	#REF!	#REF!
#REF!	#REF!	#REF!	#REF!	#REF!	#REF!	#REF!	#REF!	#REF!	#REF!	#REF!	#REF!	#REF!	#REF!	#REF!	#REF!
#REF!	#REF!	#REF!	#REF!	#REF!	#REF!	#REF!	#REF!	#REF!	#REF!	#REF!	#REF!	#REF!	#REF!	#REF!	#REF!
#REF!	#REF!	#REF!	#REF!	#REF!	#REF!	#REF!	#REF!	#REF!	#REF!	#REF!	#REF!	#REF!	#REF!	#REF!	#REF!
#REF!	#REF!	#REF!	#REF!	#REF!	#REF!	#REF!	#REF!	#REF!	#REF!	#REF!	#REF!	#REF!	#REF!	#REF!	#REF!
#REF!	#REF!	#REF!	#REF!	#REF!	#REF!	#REF!	#REF!	#REF!	#REF!	#REF!	#REF!	#REF!	#REF!	#REF!	#REF!
#REF!	#REF!	#REF!	#REF!	#REF!	#REF!	#REF!	#REF!	#REF!	#REF!	#REF!	#REF!	#REF!	#REF!	#REF!	#REF!
#REF!	#REF!	#REF!	#REF!	#REF!	#REF!	#REF!	#REF!	#REF!	#REF!	#REF!	#REF!	#REF!	#REF!	#REF!	#REF!
#REF!	#REF!	#REF!	#REF!	#REF!	#REF!	#REF!	#REF!	#REF!	#REF!	#REF!	#REF!	#REF!	#REF!	#REF!	#REF!
#REF!	#REF!	#REF!	#REF!	#REF!	#REF!	#REF!	#REF!	#REF!	#REF!	#REF!	#REF!	#REF!	#REF!	#REF!	#REF!
#REF!	#REF!	#REF!	#REF!	#REF!	#REF!	#REF!	#REF!	#REF!	#REF!	#REF!	#REF!	#REF!	#REF!	#REF!	#REF!
#REF!	#REF!	#REF!	#REF!	#REF!	#REF!	#REF!	#REF!	#REF!	#REF!	#REF!	#REF!	#REF!	#REF!	#REF!	#REF!
#REF!	#REF!	#REF!	#REF!	#REF!	#REF!	#REF!	#REF!	#REF!	#REF!	#REF!	#REF!	#REF!	#REF!	#REF!	#REF!
#REF!	#REF!	#REF!	#REF!	#REF!	#REF!	#REF!	#REF!	#REF!	#REF!	#REF!	#REF!	#REF!	#REF!	#REF!	#REF!
#REF!	#REF!	#REF!	#REF!	#REF!	#REF!	#REF!	#REF!	#REF!	#REF!	#REF!	#REF!	#REF!	#REF!	#REF!	#REF!
#REF!	#REF!	#REF!	#REF!	#REF!	#REF!	#REF!	#REF!	#REF!	#REF!	#REF!	#REF!	#REF!	#REF!	#REF!	#REF!
#REF!	#REF!	#REF!	#REF!	#REF!	#REF!	#REF!	#REF!	#REF!	#REF!	#REF!	#REF!	#REF!	#REF!	#REF!	#REF!
#REF!	#REF!	#REF!	#REF!	#REF!	#REF!	#REF!	#REF!	#REF!	#REF!	#REF!	#REF!	#REF!	#REF!	#REF!	#REF!
#REF!	#REF!	#REF!	#REF!	#REF!	#REF!	#REF!	#REF!	#REF!	#REF!	#REF!	#REF!	#REF!	#REF!	#REF!	#REF!
#REF!	#REF!	#REF!	#REF!	#REF!	#REF!	#REF!	#REF!	#REF!	#REF!	#REF!	#REF!	#REF!	#REF!	#REF!	#REF!
#REF!	#REF!	#REF!	#REF!	#REF!	#REF!	#REF!	#REF!	#REF!	#REF!	#REF!	#REF!	#REF!	#REF!	#REF!	#REF!
#REF!	#REF!	#REF!	#REF!	#REF!	#REF!	#REF!	#REF!	#REF!	#REF!	#REF!	#REF!	#REF!	#REF!	#REF!	#REF!
#REF!	#REF!	#REF!	#REF!	#REF!	#REF!	#REF!	#REF!	#REF!	#REF!	#REF!	#REF!	#REF!	#REF!	#REF!	#REF!
#REF!	#REF!	#REF!	#REF!	#REF!	#REF!	#REF!	#REF!	#REF!	#REF!	#REF!	#REF!	#REF!	#REF!	#REF!	#REF!
#REF!	#REF!	#REF!	#REF!	#REF!	#REF!	#REF!	#REF!	#REF!	#REF!	#REF!	#REF!	#REF!	#REF!	#REF!	#REF!
#REF!	#REF!	#REF!	#REF!	#REF!	#REF!	#REF!	#REF!	#REF!	#REF!	#REF!	#REF!	#REF!	#REF!	#REF!	#REF!
#REF!	#REF!	#REF!	#REF!	#REF!	#REF!	#REF!	#REF!	#REF!	#REF!	#REF!	#REF!	#REF!	#REF!	#REF!	#REF!
#REF!	#REF!	#REF!	#REF!	#REF!	#REF!	#REF!	#REF!	#REF!	#REF!	#REF!	#REF!	#REF!	#REF!	#REF!	#REF!
#REF!	#REF!	#REF!	#REF!	#REF!	#REF!	#REF!	#REF!	#REF!	#REF!	#REF!	#REF!	#REF!	#REF!	#REF!	#REF!
#REF!	#REF!	#REF!	#REF!	#REF!	#REF!	#REF!	#REF!	#REF!	#REF!	#REF!	#REF!	#REF!	#REF!	#REF!	#REF!
#REF!	#REF!	#REF!	#REF!	#REF!	#REF!	#REF!	#REF!	#REF!	#REF!	#REF!	#REF!	#REF!	#REF!	#REF!	#REF!
#REF!	#REF!	#REF!	#REF!	#REF!	#REF!	#REF!	#REF!	#REF!	#REF!	#REF!	#REF!	#REF!	#REF!	#REF!	#REF!
#REF!	#REF!	#REF!	#REF!	#REF!	#REF!	#REF!	#REF!	#REF!	#REF!	#REF!	#REF!	#REF!	#REF!	#REF!	#REF!
#REF!	#REF!	#REF!	#REF!	#REF!	#REF!	#REF!	#REF!	#REF!	#REF!	#REF!	#REF!	#REF!	#REF!	#REF!	#REF!
#REF!	#REF!	#REF!	#REF!	#REF!	#REF!	#REF!	#REF!	#REF!	#REF!	#REF!	#REF!	#REF!	#REF!	#REF!	#REF!
#REF!	#REF!	#REF!	#REF!	#REF!	#REF!	#REF!	#REF!	#REF!	#REF!	#REF!	#REF!	#REF!	#REF!	#REF!	#REF!
#REF!	#REF!	#REF!	#REF!	#REF!	#REF!	#REF!	#REF!	#REF!	#REF!	#REF!	#REF!	#REF!	#REF!	#REF!	#REF!
#REF!	#REF!	#REF!	#REF!	#REF!	#REF!	#REF!	#REF!	#REF!	#REF!	#REF!	#REF!	#REF!	#REF!	#REF!	#REF!
#REF!	#REF!	#REF!	#REF!	#REF!	#REF!	#REF!	#REF!	#REF!	#REF!	#REF!	#REF!	#REF!	#REF!	#REF!	#REF!
#REF!	#REF!	#REF!	#REF!	#REF!	#REF!	#REF!	#REF!	#REF!	#REF!	#REF!	#REF!	#REF!	#REF!	#REF!	#REF!
#REF!	#REF!	#REF!	#REF!	#REF!	#REF!	#REF!	#REF!	#REF!	#REF!	#REF!	#REF!	#REF!	#REF!	#REF!	#REF!
#REF!	#REF!	#REF!	#REF!	#REF!	#REF!	#REF!	#REF!	#REF!	#REF!	#REF!	#REF!	#REF!	#REF!	#REF!	#REF!
#REF!	#REF!	#REF!	#REF!	#REF!	#REF!	#REF!	#REF!	#REF!	#REF!	#REF!	#REF!	#REF!	#REF!	#REF!	#REF!
#REF!	#REF!	#REF!	#REF!	#REF!	#REF!	#REF!	#REF!	#REF!	#REF!	#REF!	#REF!	#REF!	#REF!	#REF!	#REF!
#REF!	#REF!	#REF!	#REF!	#REF!	#REF!	#REF!	#REF!	#REF!	#REF!	#REF!	#REF!	#REF!	#REF!	#REF!	#REF!
#REF!	#REF!	#REF!	#REF!	#REF!	#REF!	#REF!	#REF!	#REF!	#REF!	#REF!	#REF!	#REF!	#REF!	#REF!	#REF!
#REF!	#REF!	#REF!	#REF!	#REF!	#REF!	#REF!	#REF!	#REF!	#REF!	#REF!	#REF!	#REF!	#REF!	#REF!	#REF!
#REF!	#REF!	#REF!	#REF!	#REF!	#REF!	#REF!	#REF!	#REF!	#REF!	#REF!	#REF!	#REF!	#REF!	#REF!	#REF!
#REF!	#REF!	#REF!	#REF!	#REF!	#REF!	#REF!	#REF!	#REF!	#REF!	#REF!	#REF!	#REF!	#REF!	#REF!	#REF!
#REF!	#REF!	#REF!	#REF!	#REF!	#REF!	#REF!	#REF!	#REF!	#REF!	#REF!	#REF!	#REF!	#REF!	#REF!	#REF!
#REF!	#REF!	#REF!	#REF!	#REF!	#REF!	#REF!	#REF!	#REF!	#REF!	#REF!	#REF!	#REF!	#REF!	#REF!	#REF!
#REF!	#REF!	#REF!	#REF!	#REF!	#REF!	#REF!	#REF!	#REF!	#REF!	#REF!	#REF!	#REF!	#REF!	#REF!	#REF!
#REF!	#REF!	#REF!	#REF!	#REF!	#REF!	#REF!	#REF!	#REF!	#REF!	#REF!	#REF!	#REF!	#REF!	#REF!	#REF!
#REF!	#REF!	#REF!	#REF!	#REF!	#REF!	#REF!	#REF!	#REF!	#REF!	#REF!	#REF!	#REF!	#REF!	#REF!	#REF!
#REF!	#REF!	#REF!	#REF!	#REF!	#REF!	#REF!	#REF!	#REF!	#REF!	#REF!	#REF!	#REF!	#REF!	#REF!	#REF!
#REF!	#REF!	#REF!	#REF!	#REF!	#REF!	#REF!	#REF!	#REF!	#REF!	#REF!	#REF!	#REF!	#REF!	#REF!	#REF!
#REF!	#REF!	#REF!	#REF!	#REF!	#REF!	#REF!	#REF!	#REF!	#REF!	#REF!	#REF!	#REF!	#REF!	#REF!	#REF!
#REF!	#REF!	#REF!	#REF!	#REF!	#REF!	#REF!	#REF!	#REF!	#REF!	#REF!	#REF!	#REF!	#REF!	#REF!	#REF!
#REF!	#REF!	#REF!	#REF!	#REF!	#REF!	#REF!	#REF!	#REF!	#REF!	#REF!	#REF!	#REF!	#REF!	#REF!	#REF!
#REF!	#REF!	#REF!	#REF!	#REF!	#REF!	#REF!	#REF!	#REF!	#REF!	#REF!	#REF!	#REF!	#REF!	#REF!	#REF!
#REF!	#REF!	#REF!	#REF!	#REF!	#REF!	#REF!	#REF!	#REF!	#REF!	#REF!	#REF!	#REF!	#REF!	#REF!	#REF!
#REF!	#REF!	#REF!	#REF!	#REF!	#REF!	#REF!	#REF!	#REF!	#REF!	#REF!	#REF!	#REF!	#REF!	#REF!	#REF!
#REF!	#REF!	#REF!	#REF!	#REF!	#REF!	#REF!	#REF!	#REF!	#REF!	#REF!	#REF!	#REF!	#REF!	#REF!	#REF!
#REF!	#REF!	#REF!	#REF!	#REF!	#REF!	#REF!	#REF!	#REF!	#REF!	#REF!	#REF!	#REF!	#REF!	#REF!	#REF!
#REF!	#REF!	#REF!	#REF!	#REF!	#REF!	#REF!	#REF!	#REF!	#REF!	#REF!	#REF!	#REF!	#REF!	#REF!	#REF!
#REF!	#REF!	#REF!	#REF!	#REF!	#REF!	#REF!	#REF!	#REF!	#REF!	#REF!	#REF!	#REF!	#REF!	#REF!	#REF!
#REF!	#REF!	#REF!	#REF!	#REF!	#REF!	#REF!	#REF!	#REF!	#REF!	#REF!	#REF!	#REF!	#REF!	#REF!	#REF!
#REF!	#REF!	#REF!	#REF!	#REF!	#REF!	#REF!	#REF!	#REF!	#REF!	#REF!	#REF!	#REF!	#REF!	#REF!	#REF!
#REF!	#REF!	#REF!	#REF!	#REF!	#REF!	#REF!	#REF!	#REF!	#REF!	#REF!	#REF!	#REF!	#REF!	#REF!	#REF!
#REF!	#REF!	#REF!	#REF!	#REF!	#REF!	#REF!	#REF!	#REF!	#REF!	#REF!	#REF!	#REF!	#REF!	#REF!	#REF!
#REF!	#REF!	#REF!	#REF!	#REF!	#REF!	#REF!	#REF!	#REF!	#REF!	#REF!	#REF!	#REF!	#REF!	#REF!	#REF!
#REF!	#REF!	#REF!	#REF!	#REF!	#REF!	#REF!	#REF!	#REF!	#REF!	#REF!	#REF!	#REF!	#REF!	#REF!	#REF!
#REF!	#REF!	#REF!	#REF!	#REF!	#REF!	#REF!	#REF!	#REF!	#REF!	#REF!	#REF!	#REF!	#REF!	#REF!	#REF!
#REF!	#REF!	#REF!	#REF!	#REF!	#REF!	#REF!	#REF!	#REF!	#REF!	#REF!	#REF!	#REF!	#REF!	#REF!	#REF!
#REF!	#REF!	#REF!	#REF!	#REF!	#REF!	#REF!	#REF!	#REF!	#REF!	#REF!	#REF!	#REF!	#REF!	#REF!	#REF!
#REF!	#REF!	#REF!	#REF!	#REF!	#REF!	#REF!	#REF!	#REF!	#REF!	#REF!	#REF!	#REF!	#REF!	#REF!	#REF!
#REF!	#REF!	#REF!	#REF!	#REF!	#REF!	#REF!	#REF!	#REF!	#REF!	#REF!	#REF!	#REF!	#REF!	#REF!	#REF!
#REF!	#REF!	#REF!	#REF!	#REF!	#REF!	#REF!	#REF!	#REF!	#REF!	#REF!	#REF!	#REF!	#REF!	#REF!	#REF!
#REF!	#REF!	#REF!	#REF!	#REF!	#REF!	#REF!	#REF!	#REF!	#REF!	#REF!	#REF!	#REF!	#REF!	#REF!	#REF!
#REF!	#REF!	#REF!	#REF!	#REF!	#REF!	#REF!	#REF!	#REF!	#REF!	#REF!	#REF!	#REF!	#REF!	#REF!	#REF!
#REF!	#REF!	#REF!	#REF!	#REF!	#REF!	#REF!	#REF!	#REF!	#REF!	#REF!	#REF!	#REF!	#REF!	#REF!	#REF!
#REF!	#REF!	#REF!	#REF!	#REF!	#REF!	#REF!	#REF!	#REF!	#REF!	#REF!	#REF!	#REF!	#REF!	#REF!	#REF!
#REF!	#REF!	#REF!	#REF!	#REF!	#REF!	#REF!	#REF!	#REF!	#REF!	#REF!	#REF!	#REF!	#REF!	#REF!	#REF!
#REF!	#REF!	#REF!	#REF!	#REF!	#REF!	#REF!	#REF!	#REF!	#REF!	#REF!	#REF!	#REF!	#REF!	#REF!	#REF!
#REF!	#REF!	#REF!	#REF!	#REF!	#REF!	#REF!	#REF!	#REF!	#REF!	#REF!	#REF!	#REF!	#REF!	#REF!	#REF!
#REF!	#REF!	#REF!	#REF!	#REF!	#REF!	#REF!	#REF!	#REF!	#REF!	#REF!	#REF!	#REF!	#REF!	#REF!	#REF!
#REF!	#REF!	#REF!	#REF!	#REF!	#REF!	#REF!	#REF!	#REF!	#REF!	#REF!	#REF!	#REF!	#REF!	#REF!	#REF!
#REF!	#REF!	#REF!	#REF!	#REF!	#REF!	#REF!	#REF!	#REF!	#REF!	#REF!	#REF!	#REF!	#REF!	#REF!	#REF!
#REF!	#REF!	#REF!	#REF!	#REF!	#REF!	#REF!	#REF!	#REF!	#REF!	#REF!	#REF!	#REF!	#REF!	#REF!	#REF!
#REF!	#REF!	#REF!	#REF!	#REF!	#REF!	#REF!	#REF!	#REF!	#REF!	#REF!	#REF!	#REF!	#REF!	#REF!	#REF!
#REF!	#REF!	#REF!	#REF!	#REF!	#REF!	#REF!	#REF!	#REF!	#REF!	#REF!	#REF!	#REF!	#REF!	#REF!	#REF!
#REF!	#REF!	#REF!	#REF!	#REF!	#REF!	#REF!	#REF!	#REF!	#REF!	#REF!	#REF!	#REF!	#REF!	#REF!	#REF!
#REF!	#REF!	#REF!	#REF!	#REF!	#REF!	#REF!	#REF!	#REF!	#REF!	#REF!	#REF!	#REF!	#REF!	#REF!	#REF!
#REF!	#REF!	#REF!	#REF!	#REF!	#REF!	#REF!	#REF!	#REF!	#REF!	#REF!	#REF!	#REF!	#REF!	#REF!	#REF!
#REF!	#REF!	#REF!	#REF!	#REF!	#REF!	#REF!	#REF!	#REF!	#REF!	#REF!	#REF!	#REF!	#REF!	#REF!	#REF!
#REF!	#REF!	#REF!	#REF!	#REF!	#REF!	#REF!	#REF!	#REF!	#REF!	#REF!	#REF!	#REF!	#REF!	#REF!	#REF!
#REF!	#REF!	#REF!	#REF!	#REF!	#REF!	#REF!	#REF!	#REF!	#REF!	#REF!	#REF!	#REF!	#REF!	#REF!	#REF!
#REF!	#REF!	#REF!	#REF!	#REF!	#REF!	#REF!	#REF!	#REF!	#REF!	#REF!	#REF!	#REF!	#REF!	#REF!	#REF!
#REF!	#REF!	#REF!	#REF!	#REF!	#REF!	#REF!	#REF!	#REF!	#REF!	#REF!	#REF!	#REF!	#REF!	#REF!	#REF!
#REF!	#REF!	#REF!	#REF!	#REF!	#REF!	#REF!	#REF!	#REF!	#REF!	#REF!	#REF!	#REF!	#REF!	#REF!	#REF!
#REF!	#REF!	#REF!	#REF!	#REF!	#REF!	#REF!	#REF!	#REF!	#REF!	#REF!	#REF!	#REF!	#REF!	#REF!	#REF!
#REF!	#REF!	#REF!	#REF!	#REF!	#REF!	#REF!	#REF!	#REF!	#REF!	#REF!	#REF!	#REF!	#REF!	#REF!	#REF!
#REF!	#REF!	#REF!	#REF!	#REF!	#REF!	#REF!	#REF!	#REF!	#REF!	#REF!	#REF!	#REF!	#REF!	#REF!	#REF!
#REF!	#REF!	#REF!	#REF!	#REF!	#REF!	#REF!	#REF!	#REF!	#REF!	#REF!	#REF!	#REF!	#REF!	#REF!	#REF!
#REF!	#REF!	#REF!	#REF!	#REF!	#REF!	#REF!	#REF!	#REF!	#REF!	#REF!	#REF!	#REF!	#REF!	#REF!	#REF!
#REF!	#REF!	#REF!	#REF!	#REF!	#REF!	#REF!	#REF!	#REF!	#REF!	#REF!	#REF!	#REF!	#REF!	#REF!	#REF!
#REF!	#REF!	#REF!	#REF!	#REF!	#REF!	#REF!	#REF!	#REF!	#REF!	#REF!	#REF!	#REF!	#REF!	#REF!	#REF!
#REF!	#REF!	#REF!	#REF!	#REF!	#REF!	#REF!	#REF!	#REF!	#REF!	#REF!	#REF!	#REF!	#REF!	#REF!	#REF!
#REF!	#REF!	#REF!	#REF!	#REF!	#REF!	#REF!	#REF!	#REF!	#REF!	#REF!	#REF!	#REF!	#REF!	#REF!	#REF!
#REF!	#REF!	#REF!	#REF!	#REF!	#REF!	#REF!	#REF!	#REF!	#REF!	#REF!	#REF!	#REF!	#REF!	#REF!	#REF!
#REF!	#REF!	#REF!	#REF!	#REF!	#REF!	#REF!	#REF!	#REF!	#REF!	#REF!	#REF!	#REF!	#REF!	#REF!	#REF!
#REF!	#REF!	#REF!	#REF!	#REF!	#REF!	#REF!	#REF!	#REF!	#REF!	#REF!	#REF!	#REF!	#REF!	#REF!	#REF!
#REF!	#REF!	#REF!	#REF!	#REF!	#REF!	#REF!	#REF!	#REF!	#REF!	#REF!	#REF!	#REF!	#REF!	#REF!	#REF!
#REF!	#REF!	#REF!	#REF!	#REF!	#REF!	#REF!	#REF!	#REF!	#REF!	#REF!	#REF!	#REF!	#REF!	#REF!	#REF!
#REF!	#REF!	#REF!	#REF!	#REF!	#REF!	#REF!	#REF!	#REF!	#REF!	#REF!	#REF!	#REF!	#REF!	#REF!	#REF!
#REF!	#REF!	#REF!	#REF!	#REF!	#REF!	#REF!	#REF!	#REF!	#REF!	#REF!	#REF!	#REF!	#REF!	#REF!	#REF!
#REF!	#REF!	#REF!	#REF!	#REF!	#REF!	#REF!	#REF!	#REF!	#REF!	#REF!	#REF!	#REF!	#REF!	#REF!	#REF!
#REF!	#REF!	#REF!	#REF!	#REF!	#REF!	#REF!	#REF!	#REF!	#REF!	#REF!	#REF!	#REF!	#REF!	#REF!	#REF!
#REF!	#REF!	#REF!	#REF!	#REF!	#REF!	#REF!	#REF!	#REF!	#REF!	#REF!	#REF!	#REF!	#REF!	#REF!	#REF!
#REF!	#REF!	#REF!	#REF!	#REF!	#REF!	#REF!	#REF!	#REF!	#REF!	#REF!	#REF!	#REF!	#REF!	#REF!	#REF!
#REF!	#REF!	#REF!	#REF!	#REF!	#REF!	#REF!	#REF!	#REF!	#REF!	#REF!	#REF!	#REF!	#REF!	#REF!	#REF!
#REF!	#REF!	#REF!	#REF!	#REF!	#REF!	#REF!	#REF!	#REF!	#REF!	#REF!	#REF!	#REF!	#REF!	#REF!	#REF!
#REF!	#REF!	#REF!	#REF!	#REF!	#REF!	#REF!	#REF!	#REF!	#REF!	#REF!	#REF!	#REF!	#REF!	#REF!	#REF!
#REF!	#REF!	#REF!	#REF!	#REF!	#REF!	#REF!	#REF!	#REF!	#REF!	#REF!	#REF!	#REF!	#REF!	#REF!	#REF!
#REF!	#REF!	#REF!	#REF!	#REF!	#REF!	#REF!	#REF!	#REF!	#REF!	#REF!	#REF!	#REF!	#REF!	#REF!	#REF!
#REF!	#REF!	#REF!	#REF!	#REF!	#REF!	#REF!	#REF!	#REF!	#REF!	#REF!	#REF!	#REF!	#REF!	#REF!	#REF!
#REF!	#REF!	#REF!	#REF!	#REF!	#REF!	#REF!	#REF!	#REF!	#REF!	#REF!	#REF!	#REF!	#REF!	#REF!	#REF!
#REF!	#REF!	#REF!	#REF!	#REF!	#REF!	#REF!	#REF!	#REF!	#REF!	#REF!	#REF!	#REF!	#REF!	#REF!	#REF!
#REF!	#REF!	#REF!	#REF!	#REF!	#REF!	#REF!	#REF!	#REF!	#REF!	#REF!	#REF!	#REF!	#REF!	#REF!	#REF!
#REF!	#REF!	#REF!	#REF!	#REF!	#REF!	#REF!	#REF!	#REF!	#REF!	#REF!	#REF!	#REF!	#REF!	#REF!	#REF!
#REF!	#REF!	#REF!	#REF!	#REF!	#REF!	#REF!	#REF!	#REF!	#REF!	#REF!	#REF!	#REF!	#REF!	#REF!	#REF!
#REF!	#REF!	#REF!	#REF!	#REF!	#REF!	#REF!	#REF!	#REF!	#REF!	#REF!	#REF!	#REF!	#REF!	#REF!	#REF!
#REF!	#REF!	#REF!	#REF!	#REF!	#REF!	#REF!	#REF!	#REF!	#REF!	#REF!	#REF!	#REF!	#REF!	#REF!	#REF!
#REF!	#REF!	#REF!	#REF!	#REF!	#REF!	#REF!	#REF!	#REF!	#REF!	#REF!	#REF!	#REF!	#REF!	#REF!	#REF!
#REF!	#REF!	#REF!	#REF!	#REF!	#REF!	#REF!	#REF!	#REF!	#REF!	#REF!	#REF!	#REF!	#REF!	#REF!	#REF!
#REF!	#REF!	#REF!	#REF!	#REF!	#REF!	#REF!	#REF!	#REF!	#REF!	#REF!	#REF!	#REF!	#REF!	#REF!	#REF!
#REF!	#REF!	#REF!	#REF!	#REF!	#REF!	#REF!	#REF!	#REF!	#REF!	#REF!	#REF!	#REF!	#REF!	#REF!	#REF!
#REF!	#REF!	#REF!	#REF!	#REF!	#REF!	#REF!	#REF!	#REF!	#REF!	#REF!	#REF!	#REF!	#REF!	#REF!	#REF!
#REF!	#REF!	#REF!	#REF!	#REF!	#REF!	#REF!	#REF!	#REF!	#REF!	#REF!	#REF!	#REF!	#REF!	#REF!	#REF!
#REF!	#REF!	#REF!	#REF!	#REF!	#REF!	#REF!	#REF!	#REF!	#REF!	#REF!	#REF!	#REF!	#REF!	#REF!	#REF!
#REF!	#REF!	#REF!	#REF!	#REF!	#REF!	#REF!	#REF!	#REF!	#REF!	#REF!	#REF!	#REF!	#REF!	#REF!	#REF!
#REF!	#REF!	#REF!	#REF!	#REF!	#REF!	#REF!	#REF!	#REF!	#REF!	#REF!	#REF!	#REF!	#REF!	#REF!	#REF!
#REF!	#REF!	#REF!	#REF!	#REF!	#REF!	#REF!	#REF!	#REF!	#REF!	#REF!	#REF!	#REF!	#REF!	#REF!	#REF!
#REF!	#REF!	#REF!	#REF!	#REF!	#REF!	#REF!	#REF!	#REF!	#REF!	#REF!	#REF!	#REF!	#REF!	#REF!	#REF!
#REF!	#REF!	#REF!	#REF!	#REF!	#REF!	#REF!	#REF!	#REF!	#REF!	#REF!	#REF!	#REF!	#REF!	#REF!	#REF!
#REF!	#REF!	#REF!	#REF!	#REF!	#REF!	#REF!	#REF!	#REF!	#REF!	#REF!	#REF!	#REF!	#REF!	#REF!	#REF!
#REF!	#REF!	#REF!	#REF!	#REF!	#REF!	#REF!	#REF!	#REF!	#REF!	#REF!	#REF!	#REF!	#REF!	#REF!	#REF!
#REF!	#REF!	#REF!	#REF!	#REF!	#REF!	#REF!	#REF!	#REF!	#REF!	#REF!	#REF!	#REF!	#REF!	#REF!	#REF!
#REF!	#REF!	#REF!	#REF!	#REF!	#REF!	#REF!	#REF!	#REF!	#REF!	#REF!	#REF!	#REF!	#REF!	#REF!	#REF!
#REF!	#REF!	#REF!	#REF!	#REF!	#REF!	#REF!	#REF!	#REF!	#REF!	#REF!	#REF!	#REF!	#REF!	#REF!	#REF!
#REF!	#REF!	#REF!	#REF!	#REF!	#REF!	#REF!	#REF!	#REF!	#REF!	#REF!	#REF!	#REF!	#REF!	#REF!	#REF!
#REF!	#REF!	#REF!	#REF!	#REF!	#REF!	#REF!	#REF!	#REF!	#REF!	#REF!	#REF!	#REF!	#REF!	#REF!	#REF!
#REF!	#REF!	#REF!	#REF!	#REF!	#REF!	#REF!	#REF!	#REF!	#REF!	#REF!	#REF!	#REF!	#REF!	#REF!	#REF!
#REF!	#REF!	#REF!	#REF!	#REF!	#REF!	#REF!	#REF!	#REF!	#REF!	#REF!	#REF!	#REF!	#REF!	#REF!	#REF!
#REF!	#REF!	#REF!	#REF!	#REF!	#REF!	#REF!	#REF!	#REF!	#REF!	#REF!	#REF!	#REF!	#REF!	#REF!	#REF!
#REF!	#REF!	#REF!	#REF!	#REF!	#REF!	#REF!	#REF!	#REF!	#REF!	#REF!	#REF!	#REF!	#REF!	#REF!	#REF!
#REF!	#REF!	#REF!	#REF!	#REF!	#REF!	#REF!	#REF!	#REF!	#REF!	#REF!	#REF!	#REF!	#REF!	#REF!	#REF!
#REF!	#REF!	#REF!	#REF!	#REF!	#REF!	#REF!	#REF!	#REF!	#REF!	#REF!	#REF!	#REF!	#REF!	#REF!	#REF!
#REF!	#REF!	#REF!	#REF!	#REF!	#REF!	#REF!	#REF!	#REF!	#REF!	#REF!	#REF!	#REF!	#REF!	#REF!	#REF!
#REF!	#REF!	#REF!	#REF!	#REF!	#REF!	#REF!	#REF!	#REF!	#REF!	#REF!	#REF!	#REF!	#REF!	#REF!	#REF!
#REF!	#REF!	#REF!	#REF!	#REF!	#REF!	#REF!	#REF!	#REF!	#REF!	#REF!	#REF!	#REF!	#REF!	#REF!	#REF!
#REF!	#REF!	#REF!	#REF!	#REF!	#REF!	#REF!	#REF!	#REF!	#REF!	#REF!	#REF!	#REF!	#REF!	#REF!	#REF!
#REF!	#REF!	#REF!	#REF!	#REF!	#REF!	#REF!	#REF!	#REF!	#REF!	#REF!	#REF!	#REF!	#REF!	#REF!	#REF!
#REF!	#REF!	#REF!	#REF!	#REF!	#REF!	#REF!	#REF!	#REF!	#REF!	#REF!	#REF!	#REF!	#REF!	#REF!	#REF!
#REF!	#REF!	#REF!	#REF!	#REF!	#REF!	#REF!	#REF!	#REF!	#REF!	#REF!	#REF!	#REF!	#REF!	#REF!	#REF!
#REF!	#REF!	#REF!	#REF!	#REF!	#REF!	#REF!	#REF!	#REF!	#REF!	#REF!	#REF!	#REF!	#REF!	#REF!	#REF!
#REF!	#REF!	#REF!	#REF!	#REF!	#REF!	#REF!	#REF!	#REF!	#REF!	#REF!	#REF!	#REF!	#REF!	#REF!	#REF!
#REF!	#REF!	#REF!	#REF!	#REF!	#REF!	#REF!	#REF!	#REF!	#REF!	#REF!	#REF!	#REF!	#REF!	#REF!	#REF!
#REF!	#REF!	#REF!	#REF!	#REF!	#REF!	#REF!	#REF!	#REF!	#REF!	#REF!	#REF!	#REF!	#REF!	#REF!	#REF!
#REF!	#REF!	#REF!	#REF!	#REF!	#REF!	#REF!	#REF!	#REF!	#REF!	#REF!	#REF!	#REF!	#REF!	#REF!	#REF!
#REF!	#REF!	#REF!	#REF!	#REF!	#REF!	#REF!	#REF!	#REF!	#REF!	#REF!	#REF!	#REF!	#REF!	#REF!	#REF!
#REF!	#REF!	#REF!	#REF!	#REF!	#REF!	#REF!	#REF!	#REF!	#REF!	#REF!	#REF!	#REF!	#REF!	#REF!	#REF!
#REF!	#REF!	#REF!	#REF!	#REF!	#REF!	#REF!	#REF!	#REF!	#REF!	#REF!	#REF!	#REF!	#REF!	#REF!	#REF!
#REF!	#REF!	#REF!	#REF!	#REF!	#REF!	#REF!	#REF!	#REF!	#REF!	#REF!	#REF!	#REF!	#REF!	#REF!	#REF!
#REF!	#REF!	#REF!	#REF!	#REF!	#REF!	#REF!	#REF!	#REF!	#REF!	#REF!	#REF!	#REF!	#REF!	#REF!	#REF!
#REF!	#REF!	#REF!	#REF!	#REF!	#REF!	#REF!	#REF!	#REF!	#REF!	#REF!	#REF!	#REF!	#REF!	#REF!	#REF!
#REF!	#REF!	#REF!	#REF!	#REF!	#REF!	#REF!	#REF!	#REF!	#REF!	#REF!	#REF!	#REF!	#REF!	#REF!	#REF!
#REF!	#REF!	#REF!	#REF!	#REF!	#REF!	#REF!	#REF!	#REF!	#REF!	#REF!	#REF!	#REF!	#REF!	#REF!	#REF!
#REF!	#REF!	#REF!	#REF!	#REF!	#REF!	#REF!	#REF!	#REF!	#REF!	#REF!	#REF!	#REF!	#REF!	#REF!	#REF!
#REF!	#REF!	#REF!	#REF!	#REF!	#REF!	#REF!	#REF!	#REF!	#REF!	#REF!	#REF!	#REF!	#REF!	#REF!	#REF!
#REF!	#REF!	#REF!	#REF!	#REF!	#REF!	#REF!	#REF!	#REF!	#REF!	#REF!	#REF!	#REF!	#REF!	#REF!	#REF!
#REF!	#REF!	#REF!	#REF!	#REF!	#REF!	#REF!	#REF!	#REF!	#REF!	#REF!	#REF!	#REF!	#REF!	#REF!	#REF!
#REF!	#REF!	#REF!	#REF!	#REF!	#REF!	#REF!	#REF!	#REF!	#REF!	#REF!	#REF!	#REF!	#REF!	#REF!	#REF!
#REF!	#REF!	#REF!	#REF!	#REF!	#REF!	#REF!	#REF!	#REF!	#REF!	#REF!	#REF!	#REF!	#REF!	#REF!	#REF!
#REF!	#REF!	#REF!	#REF!	#REF!	#REF!	#REF!	#REF!	#REF!	#REF!	#REF!	#REF!	#REF!	#REF!	#REF!	#REF!
#REF!	#REF!	#REF!	#REF!	#REF!	#REF!	#REF!	#REF!	#REF!	#REF!	#REF!	#REF!	#REF!	#REF!	#REF!	#REF!
#REF!	#REF!	#REF!	#REF!	#REF!	#REF!	#REF!	#REF!	#REF!	#REF!	#REF!	#REF!	#REF!	#REF!	#REF!	#REF!
#REF!	#REF!	#REF!	#REF!	#REF!	#REF!	#REF!	#REF!	#REF!	#REF!	#REF!	#REF!	#REF!	#REF!	#REF!	#REF!
#REF!	#REF!	#REF!	#REF!	#REF!	#REF!	#REF!	#REF!	#REF!	#REF!	#REF!	#REF!	#REF!	#REF!	#REF!	#REF!
#REF!	#REF!	#REF!	#REF!	#REF!	#REF!	#REF!	#REF!	#REF!	#REF!	#REF!	#REF!	#REF!	#REF!	#REF!	#REF!
#REF!	#REF!	#REF!	#REF!	#REF!	#REF!	#REF!	#REF!	#REF!	#REF!	#REF!	#REF!	#REF!	#REF!	#REF!	#REF!
#REF!	#REF!	#REF!	#REF!	#REF!	#REF!	#REF!	#REF!	#REF!	#REF!	#REF!	#REF!	#REF!	#REF!	#REF!	#REF!
#REF!	#REF!	#REF!	#REF!	#REF!	#REF!	#REF!	#REF!	#REF!	#REF!	#REF!	#REF!	#REF!	#REF!	#REF!	#REF!
#REF!	#REF!	#REF!	#REF!	#REF!	#REF!	#REF!	#REF!	#REF!	#REF!	#REF!	#REF!	#REF!	#REF!	#REF!	#REF!
#REF!	#REF!	#REF!	#REF!	#REF!	#REF!	#REF!	#REF!	#REF!	#REF!	#REF!	#REF!	#REF!	#REF!	#REF!	#REF!
#REF!	#REF!	#REF!	#REF!	#REF!	#REF!	#REF!	#REF!	#REF!	#REF!	#REF!	#REF!	#REF!	#REF!	#REF!	#REF!
#REF!	#REF!	#REF!	#REF!	#REF!	#REF!	#REF!	#REF!	#REF!	#REF!	#REF!	#REF!	#REF!	#REF!	#REF!	#REF!
#REF!	#REF!	#REF!	#REF!	#REF!	#REF!	#REF!	#REF!	#REF!	#REF!	#REF!	#REF!	#REF!	#REF!	#REF!	#REF!
#REF!	#REF!	#REF!	#REF!	#REF!	#REF!	#REF!	#REF!	#REF!	#REF!	#REF!	#REF!	#REF!	#REF!	#REF!	#REF!
#REF!	#REF!	#REF!	#REF!	#REF!	#REF!	#REF!	#REF!	#REF!	#REF!	#REF!	#REF!	#REF!	#REF!	#REF!	#REF!
#REF!	#REF!	#REF!	#REF!	#REF!	#REF!	#REF!	#REF!	#REF!	#REF!	#REF!	#REF!	#REF!	#REF!	#REF!	#REF!
#REF!	#REF!	#REF!	#REF!	#REF!	#REF!	#REF!	#REF!	#REF!	#REF!	#REF!	#REF!	#REF!	#REF!	#REF!	#REF!
#REF!	#REF!	#REF!	#REF!	#REF!	#REF!	#REF!	#REF!	#REF!	#REF!	#REF!	#REF!	#REF!	#REF!	#REF!	#REF!
#REF!	#REF!	#REF!	#REF!	#REF!	#REF!	#REF!	#REF!	#REF!	#REF!	#REF!	#REF!	#REF!	#REF!	#REF!	#REF!
#REF!	#REF!	#REF!	#REF!	#REF!	#REF!	#REF!	#REF!	#REF!	#REF!	#REF!	#REF!	#REF!	#REF!	#REF!	#REF!
#REF!	#REF!	#REF!	#REF!	#REF!	#REF!	#REF!	#REF!	#REF!	#REF!	#REF!	#REF!	#REF!	#REF!	#REF!	#REF!
#REF!	#REF!	#REF!	#REF!	#REF!	#REF!	#REF!	#REF!	#REF!	#REF!	#REF!	#REF!	#REF!	#REF!	#REF!	#REF!
#REF!	#REF!	#REF!	#REF!	#REF!	#REF!	#REF!	#REF!	#REF!	#REF!	#REF!	#REF!	#REF!	#REF!	#REF!	#REF!
#REF!	#REF!	#REF!	#REF!	#REF!	#REF!	#REF!	#REF!	#REF!	#REF!	#REF!	#REF!	#REF!	#REF!	#REF!	#REF!
#REF!	#REF!	#REF!	#REF!	#REF!	#REF!	#REF!	#REF!	#REF!	#REF!	#REF!	#REF!	#REF!	#REF!	#REF!	#REF!
#REF!	#REF!	#REF!	#REF!	#REF!	#REF!	#REF!	#REF!	#REF!	#REF!	#REF!	#REF!	#REF!	#REF!	#REF!	#REF!
#REF!	#REF!	#REF!	#REF!	#REF!	#REF!	#REF!	#REF!	#REF!	#REF!	#REF!	#REF!	#REF!	#REF!	#REF!	#REF!
#REF!	#REF!	#REF!	#REF!	#REF!	#REF!	#REF!	#REF!	#REF!	#REF!	#REF!	#REF!	#REF!	#REF!	#REF!	#REF!
#REF!	#REF!	#REF!	#REF!	#REF!	#REF!	#REF!	#REF!	#REF!	#REF!	#REF!	#REF!	#REF!	#REF!	#REF!	#REF!
#REF!	#REF!	#REF!	#REF!	#REF!	#REF!	#REF!	#REF!	#REF!	#REF!	#REF!	#REF!	#REF!	#REF!	#REF!	#REF!
#REF!	#REF!	#REF!	#REF!	#REF!	#REF!	#REF!	#REF!	#REF!	#REF!	#REF!	#REF!	#REF!	#REF!	#REF!	#REF!
#REF!	#REF!	#REF!	#REF!	#REF!	#REF!	#REF!	#REF!	#REF!	#REF!	#REF!	#REF!	#REF!	#REF!	#REF!	#REF!
#REF!	#REF!	#REF!	#REF!	#REF!	#REF!	#REF!	#REF!	#REF!	#REF!	#REF!	#REF!	#REF!	#REF!	#REF!	#REF!
#REF!	#REF!	#REF!	#REF!	#REF!	#REF!	#REF!	#REF!	#REF!	#REF!	#REF!	#REF!	#REF!	#REF!	#REF!	#REF!
#REF!	#REF!	#REF!	#REF!	#REF!	#REF!	#REF!	#REF!	#REF!	#REF!	#REF!	#REF!	#REF!	#REF!	#REF!	#REF!
#REF!	#REF!	#REF!	#REF!	#REF!	#REF!	#REF!	#REF!	#REF!	#REF!	#REF!	#REF!	#REF!	#REF!	#REF!	#REF!
#REF!	#REF!	#REF!	#REF!	#REF!	#REF!	#REF!	#REF!	#REF!	#REF!	#REF!	#REF!	#REF!	#REF!	#REF!	#REF!
#REF!	#REF!	#REF!	#REF!	#REF!	#REF!	#REF!	#REF!	#REF!	#REF!	#REF!	#REF!	#REF!	#REF!	#REF!	#REF!
#REF!	#REF!	#REF!	#REF!	#REF!	#REF!	#REF!	#REF!	#REF!	#REF!	#REF!	#REF!	#REF!	#REF!	#REF!	#REF!
#REF!	#REF!	#REF!	#REF!	#REF!	#REF!	#REF!	#REF!	#REF!	#REF!	#REF!	#REF!	#REF!	#REF!	#REF!	#REF!
#REF!	#REF!	#REF!	#REF!	#REF!	#REF!	#REF!	#REF!	#REF!	#REF!	#REF!	#REF!	#REF!	#REF!	#REF!	#REF!
#REF!	#REF!	#REF!	#REF!	#REF!	#REF!	#REF!	#REF!	#REF!	#REF!	#REF!	#REF!	#REF!	#REF!	#REF!	#REF!
#REF!	#REF!	#REF!	#REF!	#REF!	#REF!	#REF!	#REF!	#REF!	#REF!	#REF!	#REF!	#REF!	#REF!	#REF!	#REF!
#REF!	#REF!	#REF!	#REF!	#REF!	#REF!	#REF!	#REF!	#REF!	#REF!	#REF!	#REF!	#REF!	#REF!	#REF!	#REF!
#REF!	#REF!	#REF!	#REF!	#REF!	#REF!	#REF!	#REF!	#REF!	#REF!	#REF!	#REF!	#REF!	#REF!	#REF!	#REF!
#REF!	#REF!	#REF!	#REF!	#REF!	#REF!	#REF!	#REF!	#REF!	#REF!	#REF!	#REF!	#REF!	#REF!	#REF!	#REF!
#REF!	#REF!	#REF!	#REF!	#REF!	#REF!	#REF!	#REF!	#REF!	#REF!	#REF!	#REF!	#REF!	#REF!	#REF!	#REF!
#REF!	#REF!	#REF!	#REF!	#REF!	#REF!	#REF!	#REF!	#REF!	#REF!	#REF!	#REF!	#REF!	#REF!	#REF!	#REF!
#REF!	#REF!	#REF!	#REF!	#REF!	#REF!	#REF!	#REF!	#REF!	#REF!	#REF!	#REF!	#REF!	#REF!	#REF!	#REF!
#REF!	#REF!	#REF!	#REF!	#REF!	#REF!	#REF!	#REF!	#REF!	#REF!	#REF!	#REF!	#REF!	#REF!	#REF!	#REF!
#REF!	#REF!	#REF!	#REF!	#REF!	#REF!	#REF!	#REF!	#REF!	#REF!	#REF!	#REF!	#REF!	#REF!	#REF!	#REF!
#REF!	#REF!	#REF!	#REF!	#REF!	#REF!	#REF!	#REF!	#REF!	#REF!	#REF!	#REF!	#REF!	#REF!	#REF!	#REF!
#REF!	#REF!	#REF!	#REF!	#REF!	#REF!	#REF!	#REF!	#REF!	#REF!	#REF!	#REF!	#REF!	#REF!	#REF!	#REF!
#REF!	#REF!	#REF!	#REF!	#REF!	#REF!	#REF!	#REF!	#REF!	#REF!	#REF!	#REF!	#REF!	#REF!	#REF!	#REF!
#REF!	#REF!	#REF!	#REF!	#REF!	#REF!	#REF!	#REF!	#REF!	#REF!	#REF!	#REF!	#REF!	#REF!	#REF!	#REF!
#REF!	#REF!	#REF!	#REF!	#REF!	#REF!	#REF!	#REF!	#REF!	#REF!	#REF!	#REF!	#REF!	#REF!	#REF!	#REF!
#REF!	#REF!	#REF!	#REF!	#REF!	#REF!	#REF!	#REF!	#REF!	#REF!	#REF!	#REF!	#REF!	#REF!	#REF!	#REF!
#REF!	#REF!	#REF!	#REF!	#REF!	#REF!	#REF!	#REF!	#REF!	#REF!	#REF!	#REF!	#REF!	#REF!	#REF!	#REF!
#REF!	#REF!	#REF!	#REF!	#REF!	#REF!	#REF!	#REF!	#REF!	#REF!	#REF!	#REF!	#REF!	#REF!	#REF!	#REF!
#REF!	#REF!	#REF!	#REF!	#REF!	#REF!	#REF!	#REF!	#REF!	#REF!	#REF!	#REF!	#REF!	#REF!	#REF!	#REF!
#REF!	#REF!	#REF!	#REF!	#REF!	#REF!	#REF!	#REF!	#REF!	#REF!	#REF!	#REF!	#REF!	#REF!	#REF!	#REF!
#REF!	#REF!	#REF!	#REF!	#REF!	#REF!	#REF!	#REF!	#REF!	#REF!	#REF!	#REF!	#REF!	#REF!	#REF!	#REF!
#REF!	#REF!	#REF!	#REF!	#REF!	#REF!	#REF!	#REF!	#REF!	#REF!	#REF!	#REF!	#REF!	#REF!	#REF!	#REF!
#REF!	#REF!	#REF!	#REF!	#REF!	#REF!	#REF!	#REF!	#REF!	#REF!	#REF!	#REF!	#REF!	#REF!	#REF!	#REF!
#REF!	#REF!	#REF!	#REF!	#REF!	#REF!	#REF!	#REF!	#REF!	#REF!	#REF!	#REF!	#REF!	#REF!	#REF!	#REF!
#REF!	#REF!	#REF!	#REF!	#REF!	#REF!	#REF!	#REF!	#REF!	#REF!	#REF!	#REF!	#REF!	#REF!	#REF!	#REF!
#REF!	#REF!	#REF!	#REF!	#REF!	#REF!	#REF!	#REF!	#REF!	#REF!	#REF!	#REF!	#REF!	#REF!	#REF!	#REF!
#REF!	#REF!	#REF!	#REF!	#REF!	#REF!	#REF!	#REF!	#REF!	#REF!	#REF!	#REF!	#REF!	#REF!	#REF!	#REF!
#REF!	#REF!	#REF!	#REF!	#REF!	#REF!	#REF!	#REF!	#REF!	#REF!	#REF!	#REF!	#REF!	#REF!	#REF!	#REF!
#REF!	#REF!	#REF!	#REF!	#REF!	#REF!	#REF!	#REF!	#REF!	#REF!	#REF!	#REF!	#REF!	#REF!	#REF!	#REF!
#REF!	#REF!	#REF!	#REF!	#REF!	#REF!	#REF!	#REF!	#REF!	#REF!	#REF!	#REF!	#REF!	#REF!	#REF!	#REF!
#REF!	#REF!	#REF!	#REF!	#REF!	#REF!	#REF!	#REF!	#REF!	#REF!	#REF!	#REF!	#REF!	#REF!	#REF!	#REF!
#REF!	#REF!	#REF!	#REF!	#REF!	#REF!	#REF!	#REF!	#REF!	#REF!	#REF!	#REF!	#REF!	#REF!	#REF!	#REF!
#REF!	#REF!	#REF!	#REF!	#REF!	#REF!	#REF!	#REF!	#REF!	#REF!	#REF!	#REF!	#REF!	#REF!	#REF!	#REF!
#REF!	#REF!	#REF!	#REF!	#REF!	#REF!	#REF!	#REF!	#REF!	#REF!	#REF!	#REF!	#REF!	#REF!	#REF!	#REF!
#REF!	#REF!	#REF!	#REF!	#REF!	#REF!	#REF!	#REF!	#REF!	#REF!	#REF!	#REF!	#REF!	#REF!	#REF!	#REF!
#REF!	#REF!	#REF!	#REF!	#REF!	#REF!	#REF!	#REF!	#REF!	#REF!	#REF!	#REF!	#REF!	#REF!	#REF!	#REF!
#REF!	#REF!	#REF!	#REF!	#REF!	#REF!	#REF!	#REF!	#REF!	#REF!	#REF!	#REF!	#REF!	#REF!	#REF!	#REF!
#REF!	#REF!	#REF!	#REF!	#REF!	#REF!	#REF!	#REF!	#REF!	#REF!	#REF!	#REF!	#REF!	#REF!	#REF!	#REF!
#REF!	#REF!	#REF!	#REF!	#REF!	#REF!	#REF!	#REF!	#REF!	#REF!	#REF!	#REF!	#REF!	#REF!	#REF!	#REF!
#REF!	#REF!	#REF!	#REF!	#REF!	#REF!	#REF!	#REF!	#REF!	#REF!	#REF!	#REF!	#REF!	#REF!	#REF!	#REF!
#REF!	#REF!	#REF!	#REF!	#REF!	#REF!	#REF!	#REF!	#REF!	#REF!	#REF!	#REF!	#REF!	#REF!	#REF!	#REF!
#REF!	#REF!	#REF!	#REF!	#REF!	#REF!	#REF!	#REF!	#REF!	#REF!	#REF!	#REF!	#REF!	#REF!	#REF!	#REF!
#REF!	#REF!	#REF!	#REF!	#REF!	#REF!	#REF!	#REF!	#REF!	#REF!	#REF!	#REF!	#REF!	#REF!	#REF!	#REF!
#REF!	#REF!	#REF!	#REF!	#REF!	#REF!	#REF!	#REF!	#REF!	#REF!	#REF!	#REF!	#REF!	#REF!	#REF!	#REF!
#REF!	#REF!	#REF!	#REF!	#REF!	#REF!	#REF!	#REF!	#REF!	#REF!	#REF!	#REF!	#REF!	#REF!	#REF!	#REF!
#REF!	#REF!	#REF!	#REF!	#REF!	#REF!	#REF!	#REF!	#REF!	#REF!	#REF!	#REF!	#REF!	#REF!	#REF!	#REF!
#REF!	#REF!	#REF!	#REF!	#REF!	#REF!	#REF!	#REF!	#REF!	#REF!	#REF!	#REF!	#REF!	#REF!	#REF!	#REF!
#REF!	#REF!	#REF!	#REF!	#REF!	#REF!	#REF!	#REF!	#REF!	#REF!	#REF!	#REF!	#REF!	#REF!	#REF!	#REF!
#REF!	#REF!	#REF!	#REF!	#REF!	#REF!	#REF!	#REF!	#REF!	#REF!	#REF!	#REF!	#REF!	#REF!	#REF!	#REF!
#REF!	#REF!	#REF!	#REF!	#REF!	#REF!	#REF!	#REF!	#REF!	#REF!	#REF!	#REF!	#REF!	#REF!	#REF!	#REF!
#REF!	#REF!	#REF!	#REF!	#REF!	#REF!	#REF!	#REF!	#REF!	#REF!	#REF!	#REF!	#REF!	#REF!	#REF!	#REF!
#REF!	#REF!	#REF!	#REF!	#REF!	#REF!	#REF!	#REF!	#REF!	#REF!	#REF!	#REF!	#REF!	#REF!	#REF!	#REF!
#REF!	#REF!	#REF!	#REF!	#REF!	#REF!	#REF!	#REF!	#REF!	#REF!	#REF!	#REF!	#REF!	#REF!	#REF!	#REF!
#REF!	#REF!	#REF!	#REF!	#REF!	#REF!	#REF!	#REF!	#REF!	#REF!	#REF!	#REF!	#REF!	#REF!	#REF!	#REF!
#REF!	#REF!	#REF!	#REF!	#REF!	#REF!	#REF!	#REF!	#REF!	#REF!	#REF!	#REF!	#REF!	#REF!	#REF!	#REF!
#REF!	#REF!	#REF!	#REF!	#REF!	#REF!	#REF!	#REF!	#REF!	#REF!	#REF!	#REF!	#REF!	#REF!	#REF!	#REF!
#REF!	#REF!	#REF!	#REF!	#REF!	#REF!	#REF!	#REF!	#REF!	#REF!	#REF!	#REF!	#REF!	#REF!	#REF!	#REF!
#REF!	#REF!	#REF!	#REF!	#REF!	#REF!	#REF!	#REF!	#REF!	#REF!	#REF!	#REF!	#REF!	#REF!	#REF!	#REF!
#REF!	#REF!	#REF!	#REF!	#REF!	#REF!	#REF!	#REF!	#REF!	#REF!	#REF!	#REF!	#REF!	#REF!	#REF!	#REF!
#REF!	#REF!	#REF!	#REF!	#REF!	#REF!	#REF!	#REF!	#REF!	#REF!	#REF!	#REF!	#REF!	#REF!	#REF!	#REF!
#REF!	#REF!	#REF!	#REF!	#REF!	#REF!	#REF!	#REF!	#REF!	#REF!	#REF!	#REF!	#REF!	#REF!	#REF!	#REF!
#REF!	#REF!	#REF!	#REF!	#REF!	#REF!	#REF!	#REF!	#REF!	#REF!	#REF!	#REF!	#REF!	#REF!	#REF!	#REF!
#REF!	#REF!	#REF!	#REF!	#REF!	#REF!	#REF!	#REF!	#REF!	#REF!	#REF!	#REF!	#REF!	#REF!	#REF!	#REF!
#REF!	#REF!	#REF!	#REF!	#REF!	#REF!	#REF!	#REF!	#REF!	#REF!	#REF!	#REF!	#REF!	#REF!	#REF!	#REF!
#REF!	#REF!	#REF!	#REF!	#REF!	#REF!	#REF!	#REF!	#REF!	#REF!	#REF!	#REF!	#REF!	#REF!	#REF!	#REF!
#REF!	#REF!	#REF!	#REF!	#REF!	#REF!	#REF!	#REF!	#REF!	#REF!	#REF!	#REF!	#REF!	#REF!	#REF!	#REF!
#REF!	#REF!	#REF!	#REF!	#REF!	#REF!	#REF!	#REF!	#REF!	#REF!	#REF!	#REF!	#REF!	#REF!	#REF!	#REF!
#REF!	#REF!	#REF!	#REF!	#REF!	#REF!	#REF!	#REF!	#REF!	#REF!	#REF!	#REF!	#REF!	#REF!	#REF!	#REF!
#REF!	#REF!	#REF!	#REF!	#REF!	#REF!	#REF!	#REF!	#REF!	#REF!	#REF!	#REF!	#REF!	#REF!	#REF!	#REF!
#REF!	#REF!	#REF!	#REF!	#REF!	#REF!	#REF!	#REF!	#REF!	#REF!	#REF!	#REF!	#REF!	#REF!	#REF!	#REF!
#REF!	#REF!	#REF!	#REF!	#REF!	#REF!	#REF!	#REF!	#REF!	#REF!	#REF!	#REF!	#REF!	#REF!	#REF!	#REF!
#REF!	#REF!	#REF!	#REF!	#REF!	#REF!	#REF!	#REF!	#REF!	#REF!	#REF!	#REF!	#REF!	#REF!	#REF!	#REF!
#REF!	#REF!	#REF!	#REF!	#REF!	#REF!	#REF!	#REF!	#REF!	#REF!	#REF!	#REF!	#REF!	#REF!	#REF!	#REF!
#REF!	#REF!	#REF!	#REF!	#REF!	#REF!	#REF!	#REF!	#REF!	#REF!	#REF!	#REF!	#REF!	#REF!	#REF!	#REF!
#REF!	#REF!	#REF!	#REF!	#REF!	#REF!	#REF!	#REF!	#REF!	#REF!	#REF!	#REF!	#REF!	#REF!	#REF!	#REF!
#REF!	#REF!	#REF!	#REF!	#REF!	#REF!	#REF!	#REF!	#REF!	#REF!	#REF!	#REF!	#REF!	#REF!	#REF!	#REF!
#REF!	#REF!	#REF!	#REF!	#REF!	#REF!	#REF!	#REF!	#REF!	#REF!	#REF!	#REF!	#REF!	#REF!	#REF!	#REF!
#REF!	#REF!	#REF!	#REF!	#REF!	#REF!	#REF!	#REF!	#REF!	#REF!	#REF!	#REF!	#REF!	#REF!	#REF!	#REF!
#REF!	#REF!	#REF!	#REF!	#REF!	#REF!	#REF!	#REF!	#REF!	#REF!	#REF!	#REF!	#REF!	#REF!	#REF!	#REF!
#REF!	#REF!	#REF!	#REF!	#REF!	#REF!	#REF!	#REF!	#REF!	#REF!	#REF!	#REF!	#REF!	#REF!	#REF!	#REF!
#REF!	#REF!	#REF!	#REF!	#REF!	#REF!	#REF!	#REF!	#REF!	#REF!	#REF!	#REF!	#REF!	#REF!	#REF!	#REF!
#REF!	#REF!	#REF!	#REF!	#REF!	#REF!	#REF!	#REF!	#REF!	#REF!	#REF!	#REF!	#REF!	#REF!	#REF!	#REF!
#REF!	#REF!	#REF!	#REF!	#REF!	#REF!	#REF!	#REF!	#REF!	#REF!	#REF!	#REF!	#REF!	#REF!	#REF!	#REF!
#REF!	#REF!	#REF!	#REF!	#REF!	#REF!	#REF!	#REF!	#REF!	#REF!	#REF!	#REF!	#REF!	#REF!	#REF!	#REF!
#REF!	#REF!	#REF!	#REF!	#REF!	#REF!	#REF!	#REF!	#REF!	#REF!	#REF!	#REF!	#REF!	#REF!	#REF!	#REF!
#REF!	#REF!	#REF!	#REF!	#REF!	#REF!	#REF!	#REF!	#REF!	#REF!	#REF!	#REF!	#REF!	#REF!	#REF!	#REF!
#REF!	#REF!	#REF!	#REF!	#REF!	#REF!	#REF!	#REF!	#REF!	#REF!	#REF!	#REF!	#REF!	#REF!	#REF!	#REF!
#REF!	#REF!	#REF!	#REF!	#REF!	#REF!	#REF!	#REF!	#REF!	#REF!	#REF!	#REF!	#REF!	#REF!	#REF!	#REF!
#REF!	#REF!	#REF!	#REF!	#REF!	#REF!	#REF!	#REF!	#REF!	#REF!	#REF!	#REF!	#REF!	#REF!	#REF!	#REF!
#REF!	#REF!	#REF!	#REF!	#REF!	#REF!	#REF!	#REF!	#REF!	#REF!	#REF!	#REF!	#REF!	#REF!	#REF!	#REF!
#REF!	#REF!	#REF!	#REF!	#REF!	#REF!	#REF!	#REF!	#REF!	#REF!	#REF!	#REF!	#REF!	#REF!	#REF!	#REF!
#REF!	#REF!	#REF!	#REF!	#REF!	#REF!	#REF!	#REF!	#REF!	#REF!	#REF!	#REF!	#REF!	#REF!	#REF!	#REF!
#REF!	#REF!	#REF!	#REF!	#REF!	#REF!	#REF!	#REF!	#REF!	#REF!	#REF!	#REF!	#REF!	#REF!	#REF!	#REF!
#REF!	#REF!	#REF!	#REF!	#REF!	#REF!	#REF!	#REF!	#REF!	#REF!	#REF!	#REF!	#REF!	#REF!	#REF!	#REF!
#REF!	#REF!	#REF!	#REF!	#REF!	#REF!	#REF!	#REF!	#REF!	#REF!	#REF!	#REF!	#REF!	#REF!	#REF!	#REF!
#REF!	#REF!	#REF!	#REF!	#REF!	#REF!	#REF!	#REF!	#REF!	#REF!	#REF!	#REF!	#REF!	#REF!	#REF!	#REF!
#REF!	#REF!	#REF!	#REF!	#REF!	#REF!	#REF!	#REF!	#REF!	#REF!	#REF!	#REF!	#REF!	#REF!	#REF!	#REF!
#REF!	#REF!	#REF!	#REF!	#REF!	#REF!	#REF!	#REF!	#REF!	#REF!	#REF!	#REF!	#REF!	#REF!	#REF!	#REF!
#REF!	#REF!	#REF!	#REF!	#REF!	#REF!	#REF!	#REF!	#REF!	#REF!	#REF!	#REF!	#REF!	#REF!	#REF!	#REF!
#REF!	#REF!	#REF!	#REF!	#REF!	#REF!	#REF!	#REF!	#REF!	#REF!	#REF!	#REF!	#REF!	#REF!	#REF!	#REF!
#REF!	#REF!	#REF!	#REF!	#REF!	#REF!	#REF!	#REF!	#REF!	#REF!	#REF!	#REF!	#REF!	#REF!	#REF!	#REF!
#REF!	#REF!	#REF!	#REF!	#REF!	#REF!	#REF!	#REF!	#REF!	#REF!	#REF!	#REF!	#REF!	#REF!	#REF!	#REF!
#REF!	#REF!	#REF!	#REF!	#REF!	#REF!	#REF!	#REF!	#REF!	#REF!	#REF!	#REF!	#REF!	#REF!	#REF!	#REF!
#REF!	#REF!	#REF!	#REF!	#REF!	#REF!	#REF!	#REF!	#REF!	#REF!	#REF!	#REF!	#REF!	#REF!	#REF!	#REF!
#REF!	#REF!	#REF!	#REF!	#REF!	#REF!	#REF!	#REF!	#REF!	#REF!	#REF!	#REF!	#REF!	#REF!	#REF!	#REF!
#REF!	#REF!	#REF!	#REF!	#REF!	#REF!	#REF!	#REF!	#REF!	#REF!	#REF!	#REF!	#REF!	#REF!	#REF!	#REF!
#REF!	#REF!	#REF!	#REF!	#REF!	#REF!	#REF!	#REF!	#REF!	#REF!	#REF!	#REF!	#REF!	#REF!	#REF!	#REF!
#REF!	#REF!	#REF!	#REF!	#REF!	#REF!	#REF!	#REF!	#REF!	#REF!	#REF!	#REF!	#REF!	#REF!	#REF!	#REF!
#REF!	#REF!	#REF!	#REF!	#REF!	#REF!	#REF!	#REF!	#REF!	#REF!	#REF!	#REF!	#REF!	#REF!	#REF!	#REF!
#REF!	#REF!	#REF!	#REF!	#REF!	#REF!	#REF!	#REF!	#REF!	#REF!	#REF!	#REF!	#REF!	#REF!	#REF!	#REF!
#REF!	#REF!	#REF!	#REF!	#REF!	#REF!	#REF!	#REF!	#REF!	#REF!	#REF!	#REF!	#REF!	#REF!	#REF!	#REF!
#REF!	#REF!	#REF!	#REF!	#REF!	#REF!	#REF!	#REF!	#REF!	#REF!	#REF!	#REF!	#REF!	#REF!	#REF!	#REF!
#REF!	#REF!	#REF!	#REF!	#REF!	#REF!	#REF!	#REF!	#REF!	#REF!	#REF!	#REF!	#REF!	#REF!	#REF!	#REF!
#REF!	#REF!	#REF!	#REF!	#REF!	#REF!	#REF!	#REF!	#REF!	#REF!	#REF!	#REF!	#REF!	#REF!	#REF!	#REF!
#REF!	#REF!	#REF!	#REF!	#REF!	#REF!	#REF!	#REF!	#REF!	#REF!	#REF!	#REF!	#REF!	#REF!	#REF!	#REF!
#REF!	#REF!	#REF!	#REF!	#REF!	#REF!	#REF!	#REF!	#REF!	#REF!	#REF!	#REF!	#REF!	#REF!	#REF!	#REF!
#REF!	#REF!	#REF!	#REF!	#REF!	#REF!	#REF!	#REF!	#REF!	#REF!	#REF!	#REF!	#REF!	#REF!	#REF!	#REF!
#REF!	#REF!	#REF!	#REF!	#REF!	#REF!	#REF!	#REF!	#REF!	#REF!	#REF!	#REF!	#REF!	#REF!	#REF!	#REF!
#REF!	#REF!	#REF!	#REF!	#REF!	#REF!	#REF!	#REF!	#REF!	#REF!	#REF!	#REF!	#REF!	#REF!	#REF!	#REF!
#REF!	#REF!	#REF!	#REF!	#REF!	#REF!	#REF!	#REF!	#REF!	#REF!	#REF!	#REF!	#REF!	#REF!	#REF!	#REF!
#REF!	#REF!	#REF!	#REF!	#REF!	#REF!	#REF!	#REF!	#REF!	#REF!	#REF!	#REF!	#REF!	#REF!	#REF!	#REF!

## Sheet: p-FinalTable
N-type Isotropic
Materials Project Boltztrap List
Example Filters: 0.05 <band gap, maxPF_n < 1E21 (as applied in Figure 3)
Description of Data: Name, MPID (from Website), task_id (from boltztrap database)
Parameters: m*Seeb (Seebeck effective mass), m*c (conductivity mass), n (carrier concentration)
Data Presented in 3 modes
1) values calculated at constant 1x10^20 cm-3 carrier concentration
2) values calculated at the carrier concentration that gives the maximum Power Factor (PF)
3) values calculated at the carrier concentration that gives the maximum zT
Data generated assuming tau = 1E-14 s, kappaL = 0.5 W/m-K, At T=600 K
mpid	name	Eg (eV)	m*Seeb (1E20 cm-3)	m*c (1E20 cm-3)	Nv*K* (1E20)	max PF (units)	n (cm-3) (max PF)	m*seeb (max PF)	m*cond (max PF)	Nv*K* (max PF)	Max zT	n (cm-3) (max zT)	m*Seeb (max zT)	m*cond (max zT)	Nv*K* (max zT)
mp-600005	Na2TlSb	0.416702	4.80945	0.272674	74.0761	44.6813	1.7e+21	4.88488	0.282812	71.7849	5.72801	9.79e+19	4.80671	0.272716	73.9956
mp-600033	GeTe	0.414497	1.55049	0.131593	40.4441	24.4445	1.25e+21	2.35321	0.175532	49.0861	2.6892	3.22e+19	1.35478	0.123469	36.3468
mp-600023	TePb	0.867404	2.52063	0.254226	31.22	32.9332	3.04e+21	4.31679	0.324229	48.5806	2.97663	4.07e+19	2.29308	0.24588	28.4803
mp-23037	Li2GaSb	0.108995	0.776694	0.12973	14.6491	25.0507	3.27e+21	3.10842	0.241422	46.2004	0.838008	3.03e+20	1.49626	0.160808	28.3824
mp-2310	Hg	0.292604	2.15446	0.264882	23.1968	18.0898	6.18e+20	2.83017	0.299819	29.0022	2.78863	2.71e+20	2.88689	0.290815	31.2766
mp-2472	GeSe	0.0583004	0.544487	0.142524	7.46707	12.5128	6.68e+20	1.55536	0.184321	24.5122	0.644414	4e+20	1.36598	0.176173	21.5902
mp-2657	SnTe	0.0428035	0.646776	0.133382	10.6778	12.2053	6.39e+21	2.70842	0.323167	24.2625	0.737275	2.82e+20	1.19665	0.159723	20.5068
mp-1479	PbSe	0.431001	0.759965	0.248375	5.35216	14.6833	7.13e+21	3.72373	0.480024	21.6059	1.09653	1.75e+19	0.547348	0.211708	4.15709
mp-1000	HfMgIr2	0	0.0417737	0.0340936	1.35627	9.55004	1.8e+21	1.57271	0.207185	20.9138	0.193049	1.15e+21	1.35123	0.193373	18.4714
mp-23193	BaO	2.0906	7.01642	1.23062	13.6141	29.0626	9.76e+21	10.6109	1.42859	20.2424	3.3858	1.93e+20	7.10583	1.23675	13.772
mp-830	AgBr	0.741605	5.45877	0.70707	21.451	18.4924	1.7e+21	5.11405	0.725296	18.723	4.73065	1.57e+20	5.44846	0.707956	21.3502
mp-20194	AgCl	0.953895	6.3955	0.88572	19.4029	18.4693	2.13e+21	5.95609	0.91284	16.6667	4.80632	1.95e+20	6.37831	0.887394	19.2701
mp-241	LuIr	0	0.0560871	0.0207966	4.42902	8.05915	3.82e+21	1.98672	0.312013	16.0674	0.11166	2.63e+21	1.73972	0.307043	13.4872
mp-1087	MgTiIr2	0.0425994	0.516143	0.138246	7.21397	8.01978	6.63e+20	1.34819	0.227369	14.4387	0.5942	3.01e+20	1.13869	0.203503	13.2358
mp-3448	ScIr	0	0.0332132	0.0266997	1.38742	7.11152	3.27e+21	1.79394	0.303485	14.3716	0.116508	2.19e+21	1.5724	0.30246	11.8534
mp-1102	TbN	0.0156057	0.50908	0.383795	1.52767	11.6492	3.69e+21	3.33866	0.576398	13.9403	0.623501	3.25e+20	1.41451	0.520818	4.47589
mp-23209	DyN	0.0514975	0.695481	0.43944	1.99103	11.4221	4.27e+21	3.43579	0.600937	13.6708	0.695693	2.57e+20	1.3083	0.525121	3.93255
mp-226	HoN	0.0843009	0.862707	0.477479	2.42865	11.1018	4.63e+21	3.47939	0.621572	13.2439	0.781653	2.14e+20	1.26319	0.52898	3.69014
mp-14099	ErN	0.131594	1.01917	0.505903	2.85936	10.9137	5.26e+21	3.57587	0.646049	13.0219	0.888222	1.74e+20	1.23433	0.531783	3.53627
mp-1216	YbO	3.4728	5.02054	1.18615	8.70795	17.9458	5.73e+21	7.30829	1.32135	13.0075	2.77405	1.64e+20	5.06564	1.18839	8.80061
mp-2286	LiH	3.018	2.83497	0.498196	13.5744	11.2913	1.18e+21	2.93946	0.536588	12.8215	3.18097	7.75e+19	2.83262	0.497472	13.5872
mp-1415	TmN	0.168697	1.12627	0.523645	3.15433	10.6024	5.78e+21	3.62934	0.668278	12.6562	1.00416	1.43e+20	1.22476	0.53513	3.46246
mp-8041	YN	0.1472	1.12231	0.524462	3.13038	10.631	5.19e+21	3.59828	0.672933	12.3647	0.981406	1.57e+20	1.27294	0.541732	3.60191
mp-1519	ThSbRh	0.753102	2.78525	0.616342	9.60648	14.6296	3.21e+21	5.29897	1.00286	12.1458	2.40243	7.98e+19	2.74549	0.611113	9.5224
mp-2784	Sr2AsAu	0.5282	1.23096	0.283656	9.04018	8.41238	9.36e+20	1.82919	0.346849	12.111	1.9074	3.34e+19	1.14452	0.271017	8.67845
mp-2534	LuN	0.248794	1.22964	0.545067	3.38836	10.0078	6.77e+21	3.71471	0.710668	11.9505	1.22349	1.01e+20	1.23094	0.545385	3.39079
mp-2490	Sr2SbAu	0.632597	1.23488	0.258197	10.4596	7.77656	6.76e+20	1.58921	0.306789	11.7899	2.1236	3.21e+19	1.16584	0.247133	10.2461
mp-1266	ThSnPt	0.673795	4.19918	0.727436	13.8693	11.8553	1.09e+21	4.03496	0.782924	11.6998	3.98495	1.43e+20	4.19438	0.729996	13.7728
mp-14037	Sr2ZnWO6	3.4088	6.05906	1.01891	14.5012	13.7882	1.65e+21	5.67464	1.10481	11.6406	4.78549	2.4e+20	6.02429	1.02643	14.2189
mp-22905	SrO	3.28739	7.38913	1.51759	10.7438	17.8879	4.94e+21	8.51958	1.66043	11.6224	3.53956	2.66e+20	7.48105	1.52442	10.8714
mp-2114	PbS	0.582895	0.614015	0.25181	3.80767	7.41808	1.02e+22	3.12847	0.611976	11.5584	1.1488	1.79e+19	0.542309	0.226711	3.69966
mp-505297	Ba2SbAu	0.629005	1.68376	0.340066	11.0173	8.50501	7.21e+20	1.93003	0.37909	11.4877	2.47382	4.69e+19	1.65257	0.334741	10.9692
mp-24411	TlBr	2.0754	2.9817	0.783484	7.42424	13.0059	1.96e+21	4.72771	0.941401	11.2542	2.13893	1.2e+20	3.04601	0.789493	7.57833
mp-1153	BaS	2.16409	4.1795	0.943635	9.32138	13.4117	2.73e+21	5.20155	1.06295	10.8251	2.85746	1.45e+20	4.2142	0.94662	9.3931
mp-612118	Yb	0	0.0229269	0.0236734	0.953072	5.93834	2.19e+21	1.60996	0.330703	10.7414	0.123929	2.11e+21	1.59172	0.326949	10.7418
mp-611517	ThO2	4.42501	7.33129	1.42943	11.6152	15.6003	3.87e+21	7.40791	1.54028	10.5474	3.92311	2.72e+20	7.33329	1.43419	11.5621
mp-19830	Ge3As4	0.154098	1.76181	0.388789	9.64645	8.59482	6.63e+20	2.24123	0.466108	10.5439	1.85019	1.9e+20	2.07352	0.416935	11.0907
mp-1820	NiO	2.3228	5.07665	1.013	11.2189	12.6738	1.97e+21	5.01549	1.04868	10.4593	3.54888	1.76e+20	5.08057	1.01525	11.1946
mp-1541	NaPaO3	2.95731	2.84699	0.880024	5.81886	11.0411	7.47e+21	5.0362	1.10657	9.7093	2.19445	1.08e+20	2.85033	0.880526	5.82413
mp-23155	UN2	0.704897	5.58904	1.15521	10.6418	12.7494	2.45e+21	5.64599	1.24955	9.60461	3.59339	2.16e+20	5.60196	1.16042	10.6069
mp-2624	Li3Sb	0.715904	1.55298	0.321993	10.592	6.55619	3.22e+20	1.55954	0.349502	9.42583	2.64619	4.68e+19	1.54703	0.314364	10.9169
mp-2605	Sn3As4	0.392402	2.60004	0.534735	10.7216	8.60217	7.8e+20	2.65857	0.597623	9.38279	2.9661	8.44e+19	2.59618	0.533127	10.7462
mp-1778	TiCoSb	1.0561	7.42848	1.56304	10.3609	14.6191	3.53e+21	7.86929	1.77011	9.37349	3.84693	2.99e+20	7.49314	1.57962	10.3316
mp-8062	CeO2	1.8671	8.41537	1.7422	10.616	15.2334	4.21e+21	8.43585	1.89942	9.35967	4.02567	3.48e+20	8.41929	1.75145	10.5394
mp-1190	Na2H6Pt	3.63701	6.73845	1.34187	11.2532	12.4627	1.93e+21	6.24155	1.41408	9.27316	4.35781	2.95e+20	6.68745	1.34982	11.0275
mp-149	ZrCoBi	1.1532	4.51812	1.07486	8.61798	12.8401	3e+21	5.94726	1.35211	9.2248	2.87259	1.66e+20	4.58833	1.0855	8.69037
mp-10695	Li2CuSb	0.465002	0.899668	0.200366	9.51456	4.82129	1.31e+20	0.889065	0.20333	9.1432	2.24189	2.74e+19	0.921149	0.194084	10.3397
mp-1986	LiI	4.2337	4.95992	1.064	10.0646	11.3073	2.12e+21	4.86935	1.13444	8.89265	3.4179	1.81e+20	4.9574	1.06847	9.99404
mp-23295	Li2AgSb	0.142901	0.933045	0.212596	9.19437	4.8091	1.41e+20	0.916994	0.214146	8.86106	1.88388	4.31e+19	0.930032	0.210635	9.27795
mp-19845	Al2ZnS4	2.494	3.73737	0.781395	10.4603	8.98025	8.1e+20	3.50656	0.825865	8.74902	3.64244	1.47e+20	3.72321	0.784549	10.3382
mp-22925	YbRbF3	6.5227	15.9076	3.26014	10.7784	17.5172	5.89e+21	13.964	3.30945	8.66729	6.23204	1.03e+21	15.6079	3.26437	10.4549
mp-22899	AcInTe2	0.468199	1.02777	0.344189	5.15996	6.72767	1.14e+21	1.90718	0.454655	8.59142	1.36641	3.44e+19	0.917225	0.326438	4.70991
mp-3136	NaH	3.7974	7.0607	1.58768	9.37839	12.6476	2.65e+21	6.75804	1.61697	8.54434	3.76864	3.06e+20	7.05305	1.59052	9.33803
mp-2741	HfOs	0	0.0486205	0.00800348	14.9731	3.58045	1.74e+22	2.17514	0.520437	8.54433	0.0157078	1.67e+22	2.12944	0.509651	8.54059
mp-14038	NaAcTe2	0.647903	1.42055	0.401987	6.64306	6.27254	4.76e+21	2.572	0.619142	8.46683	2.02802	4.7e+19	1.41586	0.401209	6.62937
mp-22862	LiAcTe2	0.598201	1.39957	0.390305	6.79028	5.97797	4.87e+21	2.46123	0.593295	8.44932	2.02772	4.95e+19	1.39609	0.390411	6.7622
mp-2175	LiBr	4.92459	6.43893	1.4432	9.42387	12.4165	3.19e+21	6.29386	1.52037	8.42272	3.55539	2.59e+20	6.43115	1.44955	9.34509
mp-21280	CsF	5.26021	11.2672	2.63349	8.84959	17.0825	8.03e+21	12.0476	2.91733	8.39214	3.9405	5.13e+20	11.3389	2.65153	8.84319
mp-1672	TaSbRu	0.708299	3.04825	0.768549	7.89895	8.56333	8.15e+21	4.31362	1.04987	8.32835	2.66728	1.1e+20	3.04894	0.769088	7.89331
mp-1500	LiCl	6.2506	7.88993	1.82979	8.95383	13.3827	4.44e+21	7.69585	1.9101	8.08727	3.66169	3.42e+20	7.87712	1.83712	8.8786
mp-23259	Hf3N4	0.930194	3.32213	0.83848	7.88653	9.33959	1.74e+21	3.74474	0.933123	8.03939	2.69478	1.19e+20	3.32922	0.840034	7.88984
mp-1315	BeSiN2	3.5623	5.26863	1.23042	8.86062	10.4001	2.02e+21	5.04696	1.26132	8.00395	3.2991	2.13e+20	5.24606	1.21673	8.95284
mp-682	P2Pt	1.0645	1.4078	0.32758	8.9091	5.56424	2.76e+20	1.41408	0.355228	7.94233	2.45516	4.3e+19	1.40306	0.318472	9.24715
mp-5811	H4BrN	4.05461	8.71364	2.0055	9.05662	13.659	3.81e+21	8.82186	2.2223	7.90927	4.03163	4.33e+20	8.7757	2.02946	8.99189
mp-643	BaSe	1.9607	2.69912	0.83555	5.80598	9.38044	2.98e+21	4.0203	1.01592	7.8722	2.14153	1.04e+20	2.70135	0.836097	5.80745
mp-8177	AlN	3.3339	6.04523	1.41523	8.82833	11.3877	2.69e+21	5.85011	1.47988	7.8597	3.4263	2.5e+20	6.03315	1.42061	8.7519
mp-22914	SiC	1.3923	2.75337	0.648732	8.74378	7.74655	8.72e+20	2.70189	0.684248	7.84658	2.80091	9.79e+19	2.75355	0.648796	8.74333
mp-22913	NbSbRu	0.374905	2.99316	0.771482	7.642	8.23605	1.35e+21	3.12303	0.806021	7.62684	2.5223	1.36e+20	3.02085	0.773675	7.71535
mp-2201	RbI	3.3455	4.70902	1.26296	7.19964	11.1395	3.26e+21	5.72094	1.47711	7.6222	2.79705	1.83e+20	4.75126	1.27072	7.22999
mp-21276	LiF	8.7164	15.2612	3.72728	8.28509	17.6868	1.11e+22	14.7801	3.83352	7.57041	4.20714	7.54e+20	15.224	3.73667	8.2237
mp-23167	HfSiRu2	0.170806	0.457731	0.215575	3.09399	6.21213	6.74e+21	3.07936	0.801157	7.53554	0.53409	5.56e+19	0.406111	0.198646	2.92314
mp-23737	TiRu	0	0.0224486	0.00611011	7.04225	3.76162	2.95e+22	2.97646	0.777771	7.48639	0.0145704	2.85e+22	2.92292	0.764637	7.47381
mp-13033	NbFeSb	0.567004	4.33723	1.10067	7.8223	9.60141	2.11e+21	4.42241	1.1635	7.41034	2.9348	1.77e+20	4.3516	1.10403	7.82537
mp-2469	Ba4Na(BN2)3	2.04411	4.58396	1.15704	7.88567	9.60771	1.67e+21	4.60391	1.21249	7.39901	3.08605	1.88e+20	4.60324	1.16115	7.89339
mp-13032	Al2CdSe4	1.26121	3.11204	0.716968	9.04313	7.32751	6.17e+20	2.97921	0.788711	7.34134	3.41961	1.37e+20	3.10392	0.72234	8.90745
mp-1265	MgSe	1.7649	3.23599	0.811368	7.96496	7.99448	1.17e+21	3.20456	0.85847	7.21217	2.797	1.15e+20	3.23501	0.812454	7.9454
mp-13031	Si	0.624406	1.24485	0.31923	7.70052	4.82779	2.18e+20	1.21333	0.325225	7.20599	2.18523	4.08e+19	1.25853	0.317446	7.89388
mp-4551	Zr3N4	0.569398	3.09022	0.81754	7.34889	8.31831	1.62e+21	3.48772	0.941974	7.12451	2.60564	1.19e+20	3.0962	0.81942	7.34486
mp-29145	TlCl	2.1809	1.32875	0.68994	2.6727	9.09501	3.88e+21	4.47768	1.2186	7.04345	1.28292	5.49e+19	1.29446	0.672583	2.67001
mp-1029	LaAlO3	3.4924	6.61165	1.7498	7.34485	11.5594	6.13e+21	7.02733	1.92233	6.98945	3.20569	2.93e+20	6.60073	1.75616	7.28687
mp-6613	SrCl2	5.2286	4.25406	1.32101	5.77893	11.091	1.2e+22	7.50544	2.05427	6.98358	2.65001	1.94e+20	4.25051	1.32726	5.73095
mp-22916	AcGaTe2	0.5545	1.3829	0.376225	7.04714	5.1167	3.5e+20	1.3633	0.373356	6.97756	2.0621	4.76e+19	1.38844	0.378802	7.01731
mp-375	RbF	5.5258	23.1198	5.39256	8.87733	17.8688	9.6e+21	20.3014	5.6047	6.89381	6.87844	1.74e+21	22.651	5.42632	8.52848
mp-971	Al2CdS4	2.46619	3.87203	0.949878	8.23011	7.69815	8.38e+20	3.63838	1.01426	6.79424	3.42889	1.78e+20	3.84877	0.956837	8.06725
mp-315	Na3As	0.119295	2.73745	0.988026	4.61175	8.64028	1.68e+21	4.10685	1.15152	6.7353	2.29718	3.22e+20	3.93814	1.08252	6.93881
mp-2352	AlP	1.63021	2.24833	0.598628	7.2787	6.26671	6.98e+20	2.21199	0.629137	6.59259	2.47055	8.39e+19	2.25098	0.598009	7.30289
mp-2172	AlAs	1.51899	1.91971	0.513373	7.23108	5.72287	5e+20	1.86456	0.53098	6.58034	2.37753	6.8e+19	1.92742	0.512531	7.29264
mp-23231	BP	1.2437	1.31495	0.360764	6.95875	4.68888	2.53e+20	1.28746	0.368211	6.53817	2.10447	4.51e+19	1.3188	0.357995	7.07053
mp-568662	Be2C	1.1875	1.49067	0.402694	7.12211	4.97713	3.04e+20	1.45439	0.416513	6.52493	2.23226	5.3e+19	1.4973	0.399388	7.2589
mp-19717	CsCl	4.8492	15.1667	3.64936	8.47249	13.9415	5.1e+21	13.3407	3.82533	6.51277	6.21847	1.2e+21	14.7772	3.68587	8.02742
mp-25	SbIrS	1.42301	2.24332	0.574044	7.72537	6.31246	6e+20	2.37325	0.680895	6.50722	2.62867	8.07e+19	2.23745	0.569865	7.77984
mp-23251	TbCs3F6	5.7523	7.92521	1.93477	8.29031	9.94737	1.83e+21	7.03744	2.02434	6.48183	5.20178	5.57e+20	7.69487	1.95639	7.80046
mp-20305	MgPb2WO6	2.8571	6.21158	1.61848	7.5187	9.91932	2.28e+21	6.01694	1.73715	6.44628	3.44631	3e+20	6.21554	1.634	7.4189
mp-22865	BaCl2	5.4379	6.69355	1.77881	7.29945	11.0289	3.41e+21	7.27813	2.1047	6.43051	3.33141	3.2e+20	6.748	1.80121	7.2513
mp-22906	AlSb	1.2273	1.44391	0.397868	6.91359	4.83359	2.91e+20	1.39552	0.403806	6.42458	2.17007	4.86e+19	1.45916	0.397928	7.02177
mp-1410	LiMgBi	0.361898	1.51037	0.414322	6.96016	4.90895	3.11e+20	1.45944	0.425146	6.36022	2.21383	5.53e+19	1.52357	0.41323	7.07956
mp-1784	LiZnAs	0.547507	1.28071	0.3573	6.78619	4.50719	2.4e+20	1.2384	0.361535	6.33968	2.09645	4.32e+19	1.29875	0.357554	6.92266
mp-1975	MnCd6O8	0.1735	3.22559	1.21616	4.31946	8.90319	2.85e+21	4.69463	1.3727	6.3247	2.17419	2.84e+20	4.10627	1.28052	5.7424
mp-4964	CaF2	7.1148	8.46885	2.51363	6.1842	13.8948	1.83e+22	12.2159	3.57412	6.3188	3.12143	3.93e+20	8.51677	2.53393	6.16199
mp-422	Sr2NiWO6	3.36799	3.95716	1.01462	7.70236	7.55693	9.82e+20	3.79508	1.11843	6.25053	3.31116	1.77e+20	3.94137	1.02309	7.56132
mp-2117	MgS	3.3692	5.60121	1.60791	6.50178	9.71487	3.43e+21	5.68747	1.67963	6.231	2.93857	2.52e+20	5.60276	1.61304	6.47341
mp-883	GaAs	0.188697	1.3749	0.393786	6.52404	4.63062	2.77e+20	1.33074	0.393229	6.22548	1.94143	6.19e+19	1.37114	0.394883	6.47024
mp-419	NaLi2Bi	0.351503	1.31489	0.368891	6.72957	4.49271	2.4e+20	1.27992	0.379275	6.19934	1.97787	6.2e+19	1.31428	0.366337	6.79531
mp-592	LiZnP	1.3612	1.42486	0.402666	6.65645	4.68271	2.79e+20	1.38268	0.409945	6.19435	2.13301	4.95e+19	1.4363	0.401841	6.7575
mp-20351	Rb3ClO	0.477696	6.13558	1.68976	6.91903	9.46974	2.08e+21	5.86672	1.74007	6.19074	3.40054	3.29e+20	6.15951	1.69749	6.91209
mp-5967	ScTa(PbO3)2	2.5856	6.55969	1.75025	7.25562	9.61002	2.21e+21	6.06097	1.8032	6.16237	3.50263	3.19e+20	6.50747	1.75629	7.13219
mp-2667	CsAcTe2	0.909799	1.33135	0.440592	5.2527	5.45902	1.31e+21	2.00354	0.598288	6.12817	1.71918	4.73e+19	1.29562	0.431403	5.20463
mp-22898	MgS	2.7919	3.5979	1.02525	6.57402	7.5857	1.48e+21	3.56797	1.06625	6.1213	2.65667	1.46e+20	3.59459	1.02707	6.54751
mp-1342	BaLiF3	6.5643	14.8163	4.02075	7.0737	14.7007	8.16e+21	14.3476	4.30092	6.09295	4.28592	8.82e+20	14.7953	4.04879	6.98552
mp-463	UO3	1.63759	2.06719	0.967958	3.12095	7.32891	5.22e+21	4.07504	1.22355	6.07807	1.61888	9.98e+19	2.06714	0.968225	3.11954
mp-2758	KH	3.4696	8.61862	2.25072	7.49334	10.8335	3.03e+21	8.25852	2.48846	6.04586	4.0968	4.9e+20	8.58978	2.28514	7.28791
mp-1883	CsNbN2	1.5266	2.38255	0.6398	7.18614	5.62104	4.21e+20	2.24355	0.67696	6.03334	2.85949	9.89e+19	2.38304	0.639865	7.18726
mp-14105	GaP	1.5928	1.50816	0.434285	6.47157	4.76064	3.31e+20	1.45769	0.439894	6.03222	2.12649	5.3e+19	1.52022	0.434607	6.54203
mp-569028	MgSe	2.5476	4.5008	1.31415	6.33821	8.51347	2.46e+21	4.56615	1.37877	6.02682	2.75584	1.95e+20	4.50012	1.31791	6.3097
mp-5977	Rb3AuO	0.242902	1.02129	1.1351	0.85344	9.26627	1.99e+21	5.96584	1.806	6.00387	2.50445	8.29e+20	6.10312	1.76469	6.4317
mp-573697	LiMgAs	1.3965	2.17428	0.615417	6.64078	5.77562	6.26e+20	2.14641	0.650355	5.99573	2.37257	8.45e+19	2.17638	0.614567	6.66419
mp-571222	YbB6	0.0211977	0.258981	0.171329	1.85847	4.42349	6.41e+20	1.32427	0.401664	5.98649	0.426353	4.67e+20	1.22311	0.381278	5.74563
mp-23268	SrF2	6.7528	14.7751	3.91072	7.34362	14.3642	7.29e+21	14.6866	4.4621	5.97134	4.52129	8.9e+20	14.8331	3.97804	7.20017
mp-1700	LiMgP	1.5647	2.51976	0.715044	6.61512	6.20351	7.83e+20	2.49232	0.757629	5.96653	2.45953	9.72e+19	2.52007	0.71507	6.61602
mp-1569	LiMgN	2.27069	5.42762	1.54342	6.59457	8.99626	2.42e+21	5.34911	1.64108	5.88472	2.99936	2.5e+20	5.42013	1.55135	6.53058
mp-568560	H4NCl	4.9341	12.1588	3.2256	7.31846	12.3321	4.65e+21	11.2677	3.4619	5.87195	4.53191	7.53e+20	12.0481	3.26003	7.10467
mp-1747	Rb3BrO	0.409803	6.10213	1.75778	6.46808	9.15966	2.1e+21	5.90393	1.81611	5.86138	3.35125	3.3e+20	6.20931	1.76958	6.57293
mp-1253	CaO	3.64471	3.72207	1.52576	3.81018	8.88808	1.22e+22	6.63845	2.04676	5.84118	2.11023	1.79e+20	3.73246	1.53099	3.80657
mp-8352	Mn(Ni3O4)2	1.31919	4.00531	1.30434	5.38106	7.8903	1.83e+21	4.13922	1.28044	5.81219	2.4584	1.81e+20	4.03078	1.30222	5.44572
mp-1776	MgTe	2.3186	3.32094	0.98969	6.14671	7.08772	1.52e+21	3.34045	1.03624	5.78784	2.52592	1.41e+20	3.3183	0.991261	6.12478
mp-252	TiPbO3	1.58451	1.26168	0.582764	3.18555	7.13185	4.05e+21	3.86464	1.19952	5.78299	1.39987	5.31e+19	1.23884	0.570987	3.19583
mp-4974	CaB6	0.0383953	0.404969	0.22334	2.44164	4.25904	5.46e+20	1.26263	0.392203	5.77624	0.510539	3.45e+20	1.1465	0.371351	5.42478
mp-1958	NaLi2Sb	0.706394	1.47694	0.430481	6.35495	4.55296	2.97e+20	1.43405	0.445777	5.76994	2.14676	5.15e+19	1.48965	0.427649	6.5012
mp-14069	BeTe	2.0176	1.43207	0.42444	6.19756	4.50829	3.05e+20	1.39385	0.433947	5.75665	2.0657	5.21e+19	1.44048	0.423004	6.28411
mp-2030	Ba3SnO	0	0.335868	0.257749	1.48751	5.27638	2.53e+21	2.3728	0.741501	5.72432	0.387511	4.44e+20	1.1663	0.444874	4.24483
mp-6265	Be3P2	0.889105	1.16787	0.372979	5.54072	4.22844	3.47e+20	1.22068	0.38369	5.67456	1.72731	4.18e+19	1.15031	0.373422	5.40658
mp-540834	HfPbO3	2.4824	6.5272	1.8658	6.54322	9.0957	2.25e+21	6.02116	1.89296	5.67293	3.31779	3.08e+20	6.47577	1.86898	6.44957
mp-3042	BeSe	2.6874	1.8897	0.563828	6.13577	5.11766	4.86e+20	1.8346	0.579389	5.63451	2.21604	7.25e+19	1.89482	0.563247	6.17027
mp-3519	KHgF3	0.643304	3.23985	0.926629	6.53774	6.22783	6.85e+20	2.98093	0.945056	5.60199	2.84617	1.46e+20	3.22007	0.928519	6.45822
mp-20066	BeS	3.1435	2.25339	0.674673	6.10401	5.57915	6.63e+20	2.19598	0.697616	5.58494	2.3135	8.54e+19	2.25568	0.674387	6.11721
mp-546633	Li3BrO	4.2774	5.50089	1.63254	6.18522	9.22173	3.38e+21	5.95396	1.89362	5.57534	2.89898	2.44e+20	5.52034	1.64509	6.147
mp-10694	Ba3PbO	0	0.317546	0.248379	1.44557	5.03416	2.52e+21	2.29477	0.731491	5.55644	0.37588	4.36e+20	1.12879	0.434029	4.19415
mp-406	MgTe2	1.1162	2.10516	0.617752	6.29081	5.09965	3.95e+20	1.98715	0.633705	5.55283	2.48663	8.65e+19	2.11075	0.617287	6.32301
mp-23513	RbHgF3	0.652407	3.32551	0.958105	6.46647	6.28891	7.31e+20	3.04615	0.971525	5.55195	2.84608	1.46e+20	3.30465	0.959288	6.39388
mp-2589	Ba2NdNbO6	2.8574	7.56497	2.64559	4.83535	10.7447	7.78e+21	8.25918	2.63564	5.54725	2.78177	3.76e+20	7.6007	2.6553	4.84294
mp-4157	CsHgF3	0.756395	3.29152	0.958506	6.36361	6.13944	7.15e+20	3.01623	0.97947	5.40392	2.84307	1.53e+20	3.26863	0.960809	6.27469
mp-28069	SrB6	0.0348034	0.483581	0.259977	2.53689	4.11677	5.31e+20	1.28188	0.417113	5.38757	0.564244	3.12e+20	1.15108	0.3887	5.09611
mp-3762	InP	0.4679	1.61931	0.509433	5.66715	4.57163	3.81e+20	1.57111	0.513659	5.34932	2.03729	6.34e+19	1.62705	0.510263	5.6939
mp-2604	BeO	6.85081	4.78938	1.49163	5.75345	7.92776	2.06e+21	4.72058	1.54608	5.33511	2.74528	2.24e+20	4.78335	1.49596	5.71763
mp-8224	Ba2BiSbO6	1.6618	2.53545	0.762875	6.05901	5.32386	4.81e+20	2.35149	0.77479	5.28737	2.60697	1.12e+20	2.52974	0.763436	6.0319
mp-23036	Ba2MnMoO6	1.2722	2.81356	0.831487	6.22446	5.54137	5.33e+20	2.59237	0.85581	5.27204	2.77056	1.31e+20	2.7976	0.83338	6.15055
mp-28084	ScSbPt	0.647005	1.28991	0.407452	5.63278	3.98504	2.36e+20	1.25258	0.414686	5.24961	1.96229	4.91e+19	1.30569	0.406088	5.76543
mp-23060	YSbPt	0.112002	0.938743	0.306903	5.34956	3.46513	1.68e+20	0.93218	0.308917	5.24189	1.42706	5.62e+19	0.915378	0.305406	5.18902
mp-28110	GaN	1.5701	2.98357	0.955281	5.51959	6.2026	1.13e+21	2.94103	0.976397	5.22768	2.36725	1.25e+20	2.98125	0.955895	5.50786
mp-4198	TbSbPt	0.098097	0.937714	0.307335	5.32951	3.46151	1.72e+20	0.931838	0.309652	5.22036	1.39551	5.82e+19	0.911319	0.305575	5.15026
mp-6037	ZrRu	0	0.0326721	0.00659747	11.0205	2.32001	2.83e+22	2.30228	0.766072	5.20994	0.00922462	2.73e+22	2.2618	0.751552	5.22086
mp-550685	ZnTe	1.0787	1.66719	0.532724	5.53634	4.57655	4.41e+20	1.62603	0.543009	5.18184	2.03783	6.52e+19	1.67449	0.532871	5.57045
mp-5304	TlI	2.2086	1.48729	0.587288	4.0301	5.38285	1.75e+21	2.44262	0.817472	5.16505	1.58983	5.73e+19	1.45383	0.576582	4.00385
mp-4950	InAs	0	1.21544	0.450631	4.42963	4.25832	3.57e+20	1.41768	0.474959	5.15684	1.21828	1.44e+20	1.34043	0.463334	4.92065
mp-1317	MgTe(PbO3)2	2.26929	6.20569	1.89773	5.91336	8.45927	2.28e+21	5.88023	1.97548	5.13552	3.12613	3.16e+20	6.17161	1.90669	5.82341
mp-4170	Na2Te	2.0247	5.69399	1.78673	5.68899	8.31516	2.27e+21	5.59665	1.88027	5.13527	2.95992	2.79e+20	5.68777	1.79469	5.64197
mp-6492	Si(CN2)2	4.2524	4.38506	1.29548	6.22754	6.72617	9.85e+20	4.01646	1.34981	5.13285	3.19066	2.35e+20	4.32946	1.30385	6.05078
mp-14088	BaTe	1.593	1.73329	0.700262	3.89417	5.44737	3.6e+21	2.95757	0.994536	5.12829	1.70218	7.69e+19	1.72543	0.697905	3.88734
mp-22975	CdO2	1.2577	3.61315	1.39321	4.17641	7.68425	3.19e+21	4.68208	1.57665	5.11747	2.09282	1.66e+20	3.64669	1.39869	4.20985
mp-23350	CsK2Sb	0.863404	5.26323	1.5714	6.12981	7.42912	1.35e+21	4.92382	1.66063	5.10558	3.40599	2.91e+20	5.21828	1.58441	5.97709
mp-14100	BaB6	0.035402	0.293626	0.229646	1.44578	4.40278	7.76e+20	1.5928	0.537432	5.10221	0.502304	4.94e+20	1.41949	0.490669	4.92059
mp-22386	Ba2MnWO6	2.2303	2.85585	0.85968	6.05477	5.46998	5.57e+20	2.62195	0.885495	5.09516	2.7581	1.37e+20	2.83646	0.861941	5.96966
mp-23475	TaTlO3	0.460104	4.8344	1.42899	6.22258	7.11546	1.2e+21	4.58171	1.55555	5.05492	3.38217	2.75e+20	4.83451	1.4507	6.08363
mp-441	Sn3N4	0.234004	4.06513	2.41571	2.18295	9.7561	3.03e+21	8.7927	2.98642	5.05193	3.86813	8.23e+20	9.4342	2.86238	5.98365
mp-22524	TiSnPt	0.797797	4.09773	1.35997	5.23026	7.21711	2.31e+21	4.20411	1.43627	5.00791	2.50273	1.79e+20	4.09699	1.36314	5.21057
mp-2998	Ba2SmNbO6	2.857	7.04146	2.54521	4.6016	9.35875	8.08e+21	7.48331	2.56872	4.97238	2.73331	3.79e+20	7.04883	2.55356	4.58624
mp-8039	Be3N2	3.3129	3.39983	1.13981	5.15152	6.27622	1.15e+21	3.29001	1.13334	4.94604	2.41415	1.5e+20	3.39634	1.13938	5.14652
mp-22535	TaTl3Se4	2.25469	4.55801	1.37501	6.03537	6.72044	1.06e+21	4.20731	1.44951	4.94507	3.19758	2.5e+20	4.50491	1.3864	5.85726
mp-6273	KCdF3	3.1252	3.7512	1.15027	5.88919	6.17211	8.73e+20	3.42244	1.17948	4.94271	2.87008	1.87e+20	3.71377	1.1539	5.77393
mp-569571	Na2Se	2.0162	7.67297	2.4242	5.63109	9.19173	3.12e+21	7.39036	2.55373	4.92306	3.28881	4.22e+20	7.64946	2.43836	5.55648
mp-554769	ZnSe	1.1693	2.10298	0.6968	5.24314	4.96675	6.38e+20	2.04885	0.708359	4.91908	2.12016	8.9e+19	2.10495	0.697074	5.24741
mp-570377	KZnF3	3.7137	4.47958	1.38224	5.8342	6.67031	1.11e+21	4.0811	1.41647	4.89051	3.00557	2.17e+20	4.43341	1.38661	5.71707
mp-569600	RbCdF3	3.17449	3.84079	1.19687	5.74861	6.15261	8.56e+20	3.51768	1.22145	4.88729	2.8666	1.81e+20	3.80544	1.19967	5.6496
mp-14092	WO3	1.1268	6.64727	2.07554	5.73149	8.17935	2.1e+21	6.06906	2.10741	4.8872	3.23733	3.57e+20	6.57192	2.08053	5.61405
mp-23499	CsCdCl3	1.7462	4.8772	1.56543	5.49926	8.09006	2.65e+21	5.51594	1.91587	4.88517	2.71871	2.34e+20	4.9162	1.58941	5.43991
mp-568333	Li2Te	2.5238	2.42937	0.790494	5.38757	5.2958	7.5e+20	2.38273	0.830727	4.85762	2.25539	1.04e+20	2.42882	0.79091	5.38148
mp-23302	Yb3PbO	0	0.137033	0.143214	0.935965	2.14097	3.58e+20	0.549232	0.192402	4.82301	0.182181	2.6e+20	0.496586	0.18616	4.35674
mp-569639	K3AuO	0.564595	8.39519	2.642	5.66428	8.79461	2.54e+21	7.57994	2.67333	4.77442	3.81655	5.62e+20	8.35561	2.64942	5.60069
mp-22922	CsCdBr3	0.710503	6.69418	2.20731	5.28142	8.43285	2.62e+21	6.43228	2.26886	4.77347	3.05763	3.73e+20	6.67826	2.21718	5.22751
mp-1138	K3BrO	0.888996	7.12896	2.32146	5.38141	8.51775	2.44e+21	6.85563	2.4185	4.77258	3.25882	4.04e+20	7.12412	2.336	5.32585
mp-23418	ZnS	2.01859	2.36616	0.804357	5.04536	5.18087	7.83e+20	2.3235	0.82054	4.765	2.15088	1.02e+20	2.36596	0.8046	5.04244
mp-13190	Li2Se	2.9974	3.04449	1.00948	5.23751	5.89142	1.11e+21	3.01758	1.0662	4.76138	2.35791	1.33e+20	3.04173	1.01153	5.21449
mp-8398	Lu2Ti2O7	2.51909	4.92306	1.53144	5.76369	6.89293	1.24e+21	4.65558	1.64603	4.75669	3.29614	2.88e+20	4.88558	1.54983	5.59694
mp-1022	NaI	3.52549	5.60148	1.93178	4.93764	8.11672	3.19e+21	5.74593	2.03941	4.72915	2.68209	2.75e+20	5.60831	1.9384	4.92134
mp-361	CdTe	0.589399	1.89163	0.650999	4.9532	4.59065	5.49e+20	1.85436	0.659845	4.71115	2.00208	7.7e+19	1.89456	0.65144	4.95963
mp-981	Na2S	2.4399	9.42806	3.02631	5.49873	9.70111	3.81e+21	8.93988	3.18272	4.7076	3.53625	5.8e+20	9.37461	3.04649	5.39797
mp-614603	Li2S	3.41121	3.57817	1.19582	5.17596	6.36103	1.46e+21	3.56452	1.26906	4.70737	2.44742	1.64e+20	3.57417	1.19969	5.14234
mp-1779	ZnAgF3	1.61329	5.01674	1.56614	5.73306	6.86625	1.27e+21	4.65677	1.66004	4.69841	3.10616	2.55e+20	4.96438	1.5766	5.58746
mp-2530	LiZnN	0.508295	2.68314	0.917038	5.00478	5.44217	9.24e+20	2.64434	0.94743	4.6629	2.22813	1.16e+20	2.6817	0.917692	4.9954
mp-8426	Yb3SnO	0	0.109727	0.146131	0.650666	2.17439	3.96e+20	0.592849	0.213164	4.63816	0.178715	3.03e+20	0.541316	0.206884	4.23239
mp-22903	NaTaO3	2.2603	6.47773	2.08963	5.45797	7.80711	2.08e+21	5.87719	2.11535	4.63108	3.15827	3.6e+20	6.39534	2.09299	5.34127
mp-4338	Al2ZnO4	3.847	5.8061	1.90921	5.30328	7.50588	1.9e+21	5.49033	1.99025	4.58181	3.02025	3e+20	5.77301	1.9191	5.21742
mp-7482	CsK2Bi	0.302699	4.57527	1.55946	5.02533	6.78241	1.35e+21	4.58682	1.6642	4.57572	2.92328	2.97e+20	4.73212	1.58247	5.1711
mp-242	Tm2Ti2O7	2.6327	4.90218	1.57082	5.51308	6.64293	1.19e+21	4.63976	1.6882	4.55626	3.26259	2.98e+20	4.86097	1.5916	5.33744
mp-8560	TlF	2.20931	2.03471	0.706565	4.8868	4.82364	7.53e+20	2.13797	0.779428	4.54296	2.01637	8.29e+19	2.03198	0.704687	4.89651
mp-9124	NaNbO3	1.5331	6.62436	2.17005	5.3335	7.77652	2.12e+21	6.01812	2.19549	4.53832	3.15036	3.65e+20	6.54141	2.17353	5.22106
mp-9200	Er2Hf2O7	3.0068	5.62025	1.76983	5.65895	6.95165	1.37e+21	5.13245	1.87321	4.53531	3.61026	3.71e+20	5.52578	1.79128	5.41807
mp-5878	CsCdF3	3.3082	3.80784	1.24769	5.33158	5.82298	8.69e+20	3.50211	1.28649	4.49141	2.7771	2e+20	3.76881	1.25328	5.21477
mp-6058	Nb2Hg2O7	0.456294	8.44586	2.76019	5.35252	8.61171	2.71e+21	8.21823	3.05051	4.4219	3.8022	5.99e+20	8.70502	2.8283	5.39965
mp-8703	Ho2Hf2O7	3.122	5.60139	1.80855	5.45063	6.76192	1.29e+21	5.14606	1.91162	4.41682	3.56923	3.78e+20	5.50463	1.83192	5.20875
mp-1922	TiFe2Si	0.402797	1.37416	0.744888	2.50563	6.85168	6.38e+21	5.18121	1.93337	4.38708	1.1497	9.42e+19	1.36504	0.741722	2.49664
mp-8812	Mg2H6Os	3.3512	14.4198	4.91904	5.01902	11.0349	6.46e+21	12.7438	4.76027	4.38029	3.78499	9.65e+20	14.1896	4.89964	4.92845
mp-8860	BaTiO3	1.6663	6.00709	2.14807	4.67654	7.761	2.81e+21	5.90552	2.20676	4.37779	2.71561	3.29e+20	6.01231	2.15472	4.66096
mp-730	YbS	2.2234	1.69459	0.812331	3.01298	4.47111	1.13e+22	3.75095	1.40309	4.37103	1.5744	8.01e+19	1.69225	0.810673	3.01598
mp-7961	Dy2Zr2O7	2.60969	5.38372	1.74474	5.42037	6.50794	1.15e+21	4.93605	1.84645	4.37084	3.6239	3.61e+20	5.28023	1.76917	5.15614
mp-3654	KTaO3	2.0983	6.40331	2.16587	5.08344	7.51431	2.14e+21	5.85705	2.19546	4.35743	3.04272	3.45e+20	6.33735	2.16964	4.99207
mp-22867	Cd(GaO2)2	1.5784	8.80949	2.75853	5.707	8.72488	2.96e+21	8.48361	3.18128	4.3548	3.76874	5.34e+20	8.75393	2.8219	5.46376
mp-7604	CdSe	0.510105	2.2624	0.820323	4.58012	4.80341	8.14e+20	2.24716	0.843461	4.34865	2.03741	9.6e+19	2.2628	0.820521	4.57969
mp-947	ZnO2	2.134	3.12862	1.31461	3.67141	6.24673	5.24e+21	4.42697	1.66365	4.34078	1.98019	1.56e+20	3.13851	1.31899	3.67049
mp-9295	CsCaH3	3.1884	4.02479	1.38806	4.93746	6.20808	1.24e+21	4.00965	1.50947	4.32934	2.62976	2.12e+20	4.02701	1.39958	4.88067
mp-27852	RuSe2	0.312196	6.41262	2.80454	3.4575	9.23419	3.86e+21	9.14492	3.4496	4.31635	3.29713	6.39e+20	8.92588	3.03477	5.04415
mp-3163	SiO2	5.365	6.05311	1.99613	5.28062	7.08483	1.69e+21	5.50613	2.08035	4.30591	3.22217	3.47e+20	5.96652	2.00919	5.11742
mp-6204	Er2Ti2O7	2.7098	4.86592	1.60384	5.28452	6.39327	1.21e+21	4.58164	1.73222	4.30157	3.2351	3.04e+20	4.82034	1.62663	5.10132
mp-7104	Al2CdO4	2.67629	5.39439	1.79494	5.21002	6.79794	1.52e+21	5.12834	1.94793	4.27175	3.0873	3.03e+20	5.35922	1.8173	5.06422
mp-6687	Ga2HgO4	0.565602	7.49008	2.3857	5.56296	7.81869	2.16e+21	7.14314	2.71378	4.27043	3.70903	4.59e+20	7.44456	2.4428	5.3202
mp-10378	CdS	1.0461	2.52535	0.930304	4.47245	4.9951	9.22e+20	2.50533	0.954222	4.25426	2.08154	1.15e+20	2.52402	0.93073	4.46585
mp-10474	Na2LiAlH6	2.6415	1.78363	0.684991	4.20175	4.2687	7.2e+20	1.8521	0.709053	4.22161	1.8041	7.33e+19	1.78091	0.684114	4.2002
mp-10623	Ag3Ge5P6	0.5665	2.2755	0.78497	4.93554	4.1458	3.24e+20	2.08312	0.798212	4.21592	2.60436	1.25e+20	2.25691	0.786605	4.86
mp-1550	TlBr	2.3494	1.36058	0.5973	3.43794	4.18896	2.43e+21	2.28464	0.879625	4.18581	1.51093	5.5e+19	1.34207	0.588041	3.44786
mp-10492	YbGeO3	1.03509	4.7533	1.75709	4.44941	6.63751	1.78e+21	4.67613	1.80298	4.17681	2.53154	2.5e+20	4.75434	1.76131	4.43489
mp-30373	CoSb3	0.165105	0.812223	0.392603	2.97566	4.28553	7.16e+20	1.8936	0.730846	4.17055	0.831496	2.97e+20	1.43277	0.546591	4.24395
mp-10760	RbH	2.96869	3.61416	1.29868	4.64255	6.05868	1.55e+21	3.85791	1.49626	4.14018	2.36792	1.84e+20	3.63107	1.31113	4.60873
mp-568145	Ho2Ti2O7	2.71659	4.84724	1.63452	5.10688	6.20944	1.2e+21	4.55389	1.76748	4.13562	3.21212	3e+20	4.80029	1.65779	4.9273
mp-568005	Tb2Zr2O7	2.71259	5.36828	1.79424	5.17528	6.29452	1.22e+21	4.89255	1.90984	4.10023	3.56989	3.85e+20	5.2561	1.82267	4.89706
mp-30056	SrS	2.497	2.24659	1.02208	3.2588	5.05364	7.79e+21	4.00527	1.56441	4.0966	1.75359	1.14e+20	2.24879	1.02379	3.25542
mp-22895	Dy2Hf2O7	3.2327	5.44678	1.83912	5.09676	6.33355	1.24e+21	4.99997	1.95455	4.09147	3.51108	3.92e+20	5.34224	1.86785	4.83695
mp-2612	Dy2Ti2O7	2.7262	4.83922	1.66031	4.97598	6.07059	1.11e+21	4.5625	1.78717	4.07902	3.19966	3.26e+20	4.78364	1.68762	4.77227
mp-10759	NaBr	4.0899	7.03052	2.68588	4.23497	8.26796	4.48e+21	7.28864	2.85917	4.07014	2.69541	3.78e+20	7.04986	2.69734	4.22539
mp-10644	CoAsS	0.848995	2.77025	0.940977	5.05137	4.85933	6.21e+20	2.78549	1.09485	4.05809	2.54177	1.39e+20	2.77258	0.952751	4.96427
mp-570290	SrHfO3	3.74131	5.72178	2.09093	4.52677	6.94206	2.02e+21	5.42905	2.13547	4.05365	2.72914	3.14e+20	5.69884	2.09738	4.47883
mp-954	CuI	1.13631	2.36185	0.887159	4.34386	4.65187	7.51e+20	2.33771	0.920383	4.04792	2.03828	1.09e+20	2.36122	0.887741	4.33785
mp-11452	SnF3	2.7786	3.6491	1.28258	4.799	5.15251	7.05e+20	3.29139	1.29876	4.03438	2.74542	2.02e+20	3.5886	1.28536	4.66501
mp-1129	BaZrO3	3.0486	6.02167	2.23952	4.40901	7.27566	2.73e+21	5.85603	2.32201	4.00505	2.66398	3.11e+20	6.01694	2.24931	4.37511
mp-18451	Ba2CePtO6	1.42039	5.72407	2.01773	4.77819	6.58574	1.6e+21	5.23679	2.08243	3.98787	2.98935	3.38e+20	5.64551	2.02789	4.64501
mp-27608	Cr3B7IO13	1.964	2.71985	0.980203	4.62215	4.57031	5.34e+20	2.54143	1.01217	3.97869	2.412	1.45e+20	2.70315	0.98342	4.55717
mp-11327	Y2Hf2O7	3.3496	5.39991	1.85803	4.95451	6.21612	1.27e+21	4.9651	1.98351	3.9604	3.44856	3.69e+20	5.3106	1.88622	4.72417
mp-30062	Y2Ti2O7	2.721	4.75844	1.65653	4.86853	5.94656	1.13e+21	4.48337	1.792	3.9573	3.14263	3.06e+20	4.70956	1.68251	4.68312
mp-214	K3IO	1.0264	7.05056	2.60314	4.45747	7.43972	2.41e+21	6.81588	2.74273	3.91749	3.05595	4.69e+20	7.04912	2.62829	4.39231
mp-5077	InAgTe2	0.0652937	1.49188	0.666874	3.34606	3.96459	6.12e+20	1.79914	0.724018	3.91719	1.23234	1.23e+20	1.48166	0.667798	3.30487
mp-6686	Tb2Ti2O7	2.7308	4.82403	1.69021	4.82173	5.90548	1.12e+21	4.53227	1.82524	3.91286	3.18309	3.28e+20	4.76496	1.71924	4.61406
mp-23331	AgI	1.36779	2.37225	0.924258	4.11199	4.57014	8e+20	2.35096	0.946884	3.91222	1.98154	1.14e+20	2.37153	0.924759	4.10677
mp-10953	CsBr	4.2433	9.1674	3.19676	4.85627	8.36626	3.29e+21	8.88814	3.58111	3.91013	3.56066	6.26e+20	9.1532	3.26638	4.69094
mp-11652	Cr3B7BrO13	2.4249	3.30933	1.17969	4.69848	4.89091	6.6e+20	3.04173	1.22676	3.90427	2.63457	1.72e+20	3.27551	1.18579	4.59098
mp-11651	CdF2	2.8997	10.0816	3.58886	4.70826	8.70241	3.81e+21	9.58042	3.87419	3.88871	3.49689	6.99e+20	10.0088	3.63447	4.56995
mp-27691	CsBr	4.2579	11.5734	3.96944	4.97849	8.76129	3.57e+21	10.5711	4.28639	3.87297	4.50223	9.98e+20	11.327	4.04861	4.67967
mp-27830	Ba2DyNbO6	2.8568	6.43013	2.44669	4.26052	7.2859	2.87e+21	6.21048	2.52487	3.8577	2.70567	3.77e+20	6.41542	2.45673	4.21989
mp-27827	Ba2HoNbO6	2.85671	6.35567	2.42825	4.2345	7.15638	2.63e+21	6.12885	2.50563	3.82554	2.70678	3.61e+20	6.33912	2.43798	4.19275
mp-27831	YbSe	1.9741	1.4042	0.724512	2.69821	3.6644	1.24e+22	3.44906	1.41286	3.81421	1.42232	7.03e+19	1.40063	0.721458	2.70501
mp-560399	TiO2	1.781	2.43377	2.26215	1.11593	5.36814	1.6e+22	5.67033	2.32737	3.80289	0.989622	1.71e+20	2.37148	2.00252	1.28873
mp-27828	TlCl	2.5976	1.44528	0.638909	3.40226	3.78587	2.94e+21	2.30726	0.947799	3.79814	1.55663	6.22e+19	1.4354	0.632871	3.41577
mp-641923	ZnO	0.6311	4.13494	1.66063	3.92911	5.92991	1.96e+21	4.12516	1.69849	3.78502	2.26429	2.1e+20	4.13147	1.66254	3.91743
mp-546711	BaPbO3	0	0.0515629	0.0578676	0.84111	5.4843	7.39e+21	4.6071	1.89718	3.78424	0.214272	5.97e+21	4.22707	1.74924	3.7565
mp-550759	Ba2TmNbO6	2.85471	6.23613	2.39415	4.20382	7.02193	2.52e+21	6.00219	2.47275	3.78176	2.69789	3.43e+20	6.22039	2.40382	4.16267
mp-2652	Sr2MgWO6	3.2644	5.83181	2.22187	4.25232	6.65004	2e+21	5.52513	2.279	3.77482	2.74794	3.28e+20	5.80587	2.22926	4.20299
mp-5487	Ba2LuNbO6	2.8519	6.15687	2.36594	4.19793	6.9395	2.41e+21	5.91873	2.44409	3.76849	2.69873	3.51e+20	6.13961	2.37616	4.15334
mp-23339	Sr3SiO5	3.7603	8.39826	2.95962	4.78004	7.49702	2.56e+21	7.40262	3.05868	3.76511	3.55002	6.03e+20	8.18862	2.95946	4.60254
mp-504886	Li3GaN2	2.3783	3.56468	1.34452	4.31695	5.11314	8.64e+20	3.37267	1.39508	3.75893	2.48447	2.03e+20	3.54176	1.35036	4.24768
mp-23059	WO3	1.3994	9.04158	3.69803	3.82305	9.1075	3.12e+22	12.5496	5.21112	3.7372	3.07755	6.07e+20	8.87231	3.68804	3.73132
mp-614013	Zn(GaO2)2	2.3123	8.57259	3.0256	4.76925	7.56942	2.55e+21	8.02998	3.33553	3.73529	3.48284	5.6e+20	8.46959	3.08299	4.55339
mp-8059	Sr2GaSbO6	0.727905	5.23706	2.00684	4.21563	6.28159	1.76e+21	4.988	2.07584	3.72477	2.64523	2.91e+20	5.21761	2.01534	4.16567
mp-23145	TaTl3S4	2.5587	4.8328	1.74684	4.60169	5.94021	1.34e+21	4.68329	1.9499	3.72226	2.83886	2.88e+20	4.81526	1.77785	4.45745
mp-14133	Mg2FeH6	1.9201	17.4806	6.51767	4.39235	10.7065	7.72e+21	15.4037	6.41535	3.72056	4.04543	1.39e+21	17.1376	6.49972	4.28138
mp-27294	Ba2GdSbO6	3.484	8.25267	3.08465	4.37605	7.60272	2.78e+21	7.77744	3.24267	3.71451	3.23199	5.71e+20	8.19589	3.11515	4.26753
mp-23383	AlF3	7.4251	8.68601	3.20832	4.45466	7.76203	3.09e+21	7.92293	3.30546	3.71092	3.21688	5.58e+20	8.56472	3.22347	4.33097
mp-557537	Sb3Ir	0.054001	0.272135	0.277293	0.972228	2.9059	5.73e+20	1.12192	0.46808	3.71076	0.372916	4.69e+20	1.05247	0.440909	3.68801
mp-558992	Cs3Sb	0.621399	3.58576	1.34836	4.33675	5.36404	1.1e+21	3.68103	1.53821	3.70194	2.44585	1.97e+20	3.59925	1.36786	4.2683
mp-5024	Mg2H6Ru	3.06929	20.5446	7.9498	4.15442	11.4721	1.01e+22	17.5317	7.35189	3.68245	4.00759	1.52e+21	20.1274	7.86851	4.09114
mp-9839	Al5CuSe8	0.518499	3.71937	1.33521	4.64925	5.08332	8.18e+20	3.61911	1.51942	3.6761	2.83865	2.31e+20	3.71074	1.37046	4.45546
mp-3904	PbF2	4.40439	13.369	4.85662	4.56717	8.86734	4.16e+21	11.6479	4.90497	3.65944	4.25863	1.13e+21	12.9444	4.86758	4.33664
mp-545756	MgO	4.4449	5.57438	2.37451	3.59694	6.83867	4.26e+21	5.8018	2.44781	3.64903	2.34474	3.08e+20	5.58179	2.37849	3.59507
mp-10250	Ba2YNbO6	2.8565	6.30244	2.46219	4.09524	6.84296	2.49e+21	6.02174	2.54505	3.63948	2.70077	3.62e+20	6.27902	2.47273	4.04642
mp-11016	Ba2ErNbO6	2.8512	6.23155	2.43996	4.0815	6.79789	2.43e+21	5.96037	2.52088	3.63566	2.69616	3.51e+20	6.21174	2.44998	4.03716
mp-5156	NaCl	5.0033	8.45887	3.48427	3.78269	8.37663	5.5e+21	8.79897	3.73301	3.61876	2.72918	5.16e+20	8.49434	3.50438	3.7738
mp-6798	Ba2HoTaO6	3.3832	6.194	2.43376	4.06012	6.69934	2.25e+21	5.92219	2.51527	3.61283	2.69717	3.75e+20	6.16835	2.44556	4.00578
mp-19803	AgBr	1.17091	3.13737	1.29	3.79284	5.00033	1.25e+21	3.14154	1.33728	3.60066	2.07676	1.64e+20	3.13594	1.29262	3.77872
mp-12641	Ba2NiWO6	3.3435	6.81332	2.62744	4.17579	6.82888	2.16e+21	6.53484	2.78484	3.59461	3.04356	4.83e+20	6.79202	2.6544	4.09307
mp-12644	SrSnO3	0.982304	5.39104	2.1057	4.0965	6.15789	1.72e+21	5.10975	2.17934	3.59014	2.64291	3e+20	5.3608	2.11485	4.03575
mp-27882	Ba6ZrO8	2.693	5.91066	2.14847	4.56311	6.22965	1.61e+21	5.65029	2.42176	3.56377	3.13597	3.86e+20	5.86025	2.19879	4.35111
mp-4991	VCu3S4	1.0305	2.49093	1.0209	3.81123	4.3783	7.16e+20	2.5222	1.08436	3.5474	1.99906	1.27e+20	2.49472	1.02406	3.80229
mp-3443	CuBr	0.4859	3.45271	1.41017	3.83118	5.1845	1.34e+21	3.46892	1.49202	3.54511	2.1585	1.75e+20	3.45402	1.41523	3.81281
mp-540844	Zr3N4	0.680802	2.11017	0.869728	3.77921	3.92939	5.32e+20	2.02304	0.870268	3.54427	1.89058	1.01e+20	2.10994	0.869937	3.77722
mp-540957	Ba2TaBiO6	2.7128	1.06066	0.461984	3.47874	2.96733	1.06e+21	1.39118	0.600853	3.52306	1.42383	4.4e+19	1.04131	0.451401	3.5037
mp-28145	Ba2YTaO6	3.36199	6.18813	2.46216	3.98441	6.55143	2.2e+21	5.89028	2.54641	3.51814	2.69893	3.6e+20	6.15947	2.47374	3.92901
mp-8289	Ag3AuSe2	0.0260957	1.10467	0.743925	1.80949	4.19092	5.55e+20	2.46316	1.0666	3.50943	1.52663	4.1e+20	2.43212	1.02818	3.63807
mp-28166	Sr2LiReO6	1.6835	6.29397	2.50335	3.98662	6.55866	2.18e+21	5.97528	2.58853	3.50717	2.76204	3.8e+20	6.26172	2.51462	3.92945
mp-28171	Sm2Zr2O7	3.0697	5.29223	1.98294	4.36008	5.54507	1.14e+21	4.85671	2.12155	3.46365	3.37047	3.87e+20	5.18123	2.02009	4.10767
mp-3614	Sm2Ti2O7	2.7423	4.79969	1.81773	4.29067	5.3562	1.05e+21	4.49099	1.96714	3.44954	3.12244	3.3e+20	4.73069	1.85233	4.08139
mp-560790	Mg2GeO4	3.0734	8.10435	3.12991	4.16658	7.51033	3.46e+21	7.93877	3.47764	3.44908	2.95913	4.83e+20	8.07947	3.16639	4.07594
mp-573204	Ba2NbInO6	3.34861	6.17751	2.4717	3.95117	6.54946	2.4e+21	5.96733	2.61711	3.443	2.66771	3.66e+20	6.15872	2.48831	3.89386
mp-6951	SrSe	2.23099	1.82348	0.902214	2.87334	3.8988	8.8e+21	3.55273	1.55849	3.44181	1.57844	9.13e+19	1.82223	0.901422	2.87418
mp-560037	CuCl	0.561194	4.60818	1.90633	3.75834	5.84259	2e+21	4.61361	2.02762	3.43228	2.33321	2.53e+20	4.60818	1.91606	3.72975
mp-23505	SrLu2O4	3.5606	5.46416	2.09557	4.21048	5.74356	1.33e+21	5.14404	2.26265	3.42791	3.07336	3.9e+20	5.39696	2.13285	4.02515
mp-21043	Zn3N2	0	0.93899	0.872784	1.11592	4.55975	8.87e+20	2.86052	1.26018	3.41993	1.29211	4.63e+20	2.76132	1.22723	3.37508
mp-452	GaCuS2	0.704299	2.2477	1.06826	3.05204	4.63799	1.39e+21	2.91886	1.28599	3.41951	1.48054	1.29e+20	2.11961	1.04102	2.90532
mp-559695	Ca3SnO	0	0.399692	0.179332	3.32738	2.17206	4.09e+21	1.51734	0.669112	3.41487	0.351113	8.68e+19	0.382952	0.176293	3.20159
mp-5794	CaY2O4	4.15829	7.5592	2.84202	4.33783	6.67888	2.11e+21	7.08156	3.13063	3.4021	3.44534	5.49e+20	7.45972	2.90393	4.11723
mp-1818	Li6MgBr8	4.68479	5.47811	2.0868	4.25328	5.82095	1.47e+21	5.17605	2.28864	3.4012	2.82115	3.1e+20	5.42775	2.11731	4.10444
mp-545603	KMgH3	2.458	1.82137	0.795895	3.4619	3.74735	6.99e+20	1.90383	0.84305	3.39362	1.68892	8.23e+19	1.81873	0.794656	3.46244
mp-5548	Ba2ErSbO6	3.3733	5.91816	2.39481	3.88484	6.19715	1.95e+21	5.60884	2.48631	3.38826	2.68751	3.67e+20	5.88297	2.40898	3.81632
mp-27304	Tl3VS4	1.9756	6.5711	2.54603	4.14631	6.29381	1.94e+21	5.99086	2.66187	3.3764	2.97713	4e+20	6.47281	2.56498	4.00879
mp-20820	Ba2HoSbO6	3.4155	5.96042	2.41546	3.87628	6.20338	1.97e+21	5.64325	2.50757	3.37609	2.69326	3.71e+20	5.92413	2.42976	3.80708
mp-571458	Ba2DySbO6	3.4647	6.00744	2.43832	3.86722	6.21406	1.97e+21	5.69136	2.52991	3.37416	2.69923	3.68e+20	5.97142	2.45248	3.79934
mp-8630	VCu3Se4	0.853594	2.08762	0.878947	3.66043	3.92447	6.02e+20	2.14635	0.954712	3.37087	1.86483	1e+20	2.08767	0.879241	3.65873
mp-567942	TbBa2SbO6	3.5073	6.05968	2.46303	3.85895	6.22475	1.98e+21	5.73936	2.55468	3.36737	2.70611	3.68e+20	6.02266	2.47708	3.79116
mp-23137	SiOs	0.517697	3.17951	1.30292	3.81211	4.86093	1.05e+21	3.38681	1.51093	3.356	2.11468	1.95e+20	3.27668	1.33263	3.85555
mp-4876	Rb2PtI6	0.547003	3.3128	1.33274	3.91898	4.44062	6.68e+20	3.08378	1.37745	3.34974	2.44365	1.93e+20	3.28598	1.34063	3.83738
mp-8686	Tl2PtCl6	1.7341	6.569	2.55159	4.13078	6.08027	1.66e+21	5.96581	2.66623	3.34701	3.16946	4.55e+20	6.43552	2.57892	3.94201
mp-286	Nb2Cd2O7	1.8858	7.06638	2.64178	4.37472	6.41769	1.92e+21	6.75166	3.02051	3.34192	3.30867	4.85e+20	6.99983	2.72144	4.1251
mp-28593	Ba2YSbO6	3.5379	5.97725	2.44314	3.82674	6.13611	1.95e+21	5.65319	2.53595	3.32836	2.6896	3.63e+20	5.93953	2.4571	3.75832
mp-28602	Sm2Hf2O7	3.7274	5.30721	2.03578	4.20924	5.47294	1.22e+21	4.88643	2.19276	3.32661	3.26597	4.17e+20	5.19811	2.07901	3.95351
mp-23494	Cr3B7ClO13	2.70829	3.79325	1.49051	4.05987	4.6621	7.93e+20	3.44642	1.55116	3.31182	2.63499	2.24e+20	3.73194	1.50156	3.91821
mp-6137	Sc2CdS4	0.958099	2.22122	0.958163	3.52963	3.91046	6.27e+20	2.18183	0.983086	3.30633	1.86133	1.12e+20	2.2202	0.958808	3.52365
mp-21879	MgIn2O4	1.83769	11.8081	4.63142	4.07096	8.17513	4.24e+21	10.7375	4.84105	3.30327	3.74319	9.94e+20	11.6405	4.68859	3.91196
mp-23492	Ba2MgWO6	3.2253	6.08513	2.51163	3.77114	6.15654	1.98e+21	5.80235	2.61987	3.296	2.70682	3.97e+20	6.05376	2.52973	3.70192
mp-648	HgF2	0.968399	24.3657	9.47442	4.1242	12.0116	1.37e+22	23.0142	10.3946	3.29446	4.24084	2.04e+21	24.2303	9.63177	3.99005
mp-571467	K2LiAlH6	2.4456	1.62781	0.719457	3.4033	3.46476	5.57e+20	1.69577	0.766742	3.28909	1.62743	7.24e+19	1.62263	0.716437	3.40849
mp-22875	Ba2SmSbO6	3.6054	6.25855	2.56689	3.80715	6.25528	2.17e+21	5.90244	2.66951	3.28775	2.7246	4.12e+20	6.21552	2.58379	3.73103
mp-567652	Ti2Bi2O7	2.6238	9.51975	3.71676	4.09912	7.20459	2.87e+21	8.62631	3.90942	3.2777	3.58362	7.13e+20	9.33602	3.76245	3.90874
mp-571084	Tb2CaO4	4.03571	7.65844	2.95684	4.16838	6.47414	2.11e+21	7.0879	3.21269	3.27697	3.38557	5.98e+20	7.46074	2.98019	3.96102
mp-22947	RbAlO2	3.3693	5.98845	2.36344	4.03324	5.81587	1.58e+21	5.46107	2.4804	3.26688	2.94869	3.75e+20	5.88958	2.38473	3.88121
mp-3782	BaSnO3	0.378402	5.22012	2.22232	3.60006	5.84077	1.83e+21	5.1738	2.35366	3.25912	2.51311	3.5e+20	5.3586	2.24971	3.67611
mp-561947	Na2O	1.8735	19.4854	7.56195	4.13631	10.3133	8.65e+21	17.5662	7.99311	3.25793	4.344	1.65e+21	19.1476	7.63816	3.96907
mp-8978	SrHBr	3.8289	2.1957	1.28639	2.22999	4.20659	1.47e+21	2.65484	1.20864	3.25548	1.1637	6.75e+19	1.55428	0.671834	3.51886
mp-4043	Ba2DyBiO6	1.73311	5.84637	2.41026	3.77776	5.94157	1.85e+21	5.49557	2.50727	3.24502	2.71262	3.7e+20	5.80586	2.42779	3.69813
mp-505046	RuS2	0.666801	10.2819	4.1926	3.84048	8.15732	4.71e+21	10.4839	4.78853	3.23955	3.16484	7.31e+20	10.4275	4.30794	3.76588
mp-4405	Nd2Ti2O7	2.74351	4.83746	1.89964	4.06368	5.15314	1.07e+21	4.52706	2.06923	3.23603	3.07161	3.62e+20	4.75875	1.9441	3.82968
mp-2488	CsAlO2	4.27349	5.83646	2.31869	3.99356	5.69518	1.53e+21	5.31594	2.43664	3.22243	2.92408	3.64e+20	5.73965	2.33984	3.84194
mp-154	Mg(GaO2)2	3.112	11.4347	4.48924	4.06514	7.94024	4.03e+21	10.5987	4.86065	3.21986	3.70203	9.07e+20	11.3124	4.57465	3.88864
mp-22052	Sr2CaWO6	3.22709	6.31519	2.63215	3.71633	6.0724	1.96e+21	5.90324	2.71229	3.21093	2.76432	4.24e+20	6.25311	2.64599	3.63298
mp-9262	Th6CoBr15	0.681101	3.66584	1.4736	3.92364	4.3633	6.55e+20	3.32625	1.53112	3.20198	2.85747	2.59e+20	3.57661	1.48996	3.71916
mp-570223	Lu2CdS4	1.2348	2.50275	1.08373	3.50948	3.99259	6.67e+20	2.42405	1.11921	3.18748	1.96658	1.29e+20	2.49823	1.08534	3.4922
mp-22605	AlTlO2	2.2128	6.29849	2.54091	3.90276	5.8397	1.66e+21	5.76201	2.66124	3.18591	2.94422	4.27e+20	6.18494	2.56562	3.74295
mp-9071	Ba2GdNbO6	2.6513	2.89283	1.23737	3.57465	5.05953	2.27e+21	3.8148	1.76396	3.18034	1.94789	1.45e+20	2.91294	1.24971	3.55862
mp-3370	AlAgTe2	1.0466	1.76768	0.820595	3.16163	3.81807	8.28e+20	2.2231	1.02873	3.17677	1.38569	9.37e+19	1.5723	0.765186	2.94546
mp-3930	Sn2ClF3	3.5509	4.48297	1.83293	3.82498	4.7901	9.55e+20	4.13222	1.91434	3.17136	2.83782	3.08e+20	4.39821	1.83684	3.70516
mp-9437	BaLiLaTeO6	2.9506	6.0558	2.51571	3.73478	5.98498	1.96e+21	5.77837	2.67739	3.1706	2.69259	3.84e+20	6.01878	2.53981	3.64805
mp-9349	Mg(InS2)2	1.7646	6.84457	2.72649	3.97752	5.96172	1.75e+21	6.30961	2.94088	3.1426	3.17978	5.06e+20	6.7225	2.78154	3.75723
mp-1559	Ca(CdP)2	0.819702	1.32639	0.617586	3.14745	2.95338	4.56e+20	1.23877	0.578054	3.13713	1.41752	5.77e+19	1.29239	0.560751	3.49893
mp-5955	Ba2YBiO6	1.81509	5.86506	2.47124	3.65624	5.77355	1.78e+21	5.48546	2.56082	3.1351	2.68804	3.85e+20	5.81038	2.48706	3.5709
mp-7575	Tm2CdS4	1.1768	2.51423	1.10101	3.45081	3.93564	6.32e+20	2.43755	1.13805	3.13464	1.96348	1.29e+20	2.50967	1.10271	3.43347
mp-20273	Tm2CdSe4	0.657903	2.0468	0.904908	3.40178	3.58627	5.11e+20	1.99569	0.932876	3.12899	1.81872	1.01e+20	2.04662	0.905223	3.39955
mp-6799	AcFeO3	1.02079	2.2334	0.957547	3.56212	3.52755	4.2e+20	2.08714	0.984245	3.08796	2.01517	1.17e+20	2.22625	0.95946	3.53445
mp-29243	SrPt3O4	0	0.0108474	0.0326065	0.191882	2.16331	4.63e+21	1.68567	0.795236	3.08614	0.0555006	3.9e+21	1.54915	0.734704	3.06177
mp-19944	Ba2NdSbO6	3.6617	6.28948	2.66924	3.61693	5.93482	2.02e+21	5.88998	2.78017	3.08363	2.75128	4.38e+20	6.23355	2.69017	3.52724
mp-29242	SrSc2O4	3.5108	5.77812	2.35761	3.83683	5.49732	1.45e+21	5.44872	2.57699	3.07448	3.05754	4.19e+20	5.70891	2.40697	3.65279
mp-29241	Ho2CdSe4	0.608596	2.06121	0.927599	3.31241	3.57285	5.21e+20	2.03402	0.962697	3.07113	1.79717	1.03e+20	2.06106	0.928024	3.30976
mp-7580	Er2CdS4	1.14661	2.52161	1.11332	3.40867	3.89912	6.57e+20	2.44642	1.15896	3.06687	1.96028	1.35e+20	2.51651	1.11584	3.38685
mp-29342	Ca3PbO	0	0.383543	0.174713	3.25261	2.09041	5.63e+21	1.74397	0.827826	3.05774	0.347169	7.72e+19	0.356228	0.169484	3.04719
mp-9460	Ho2CdS4	1.1167	2.53369	1.12744	3.36893	3.87463	6.29e+20	2.46401	1.17221	3.04757	1.95745	1.37e+20	2.52875	1.13023	3.34663
mp-571436	Ba2PrSbO6	3.68101	6.37393	2.72281	3.58167	5.921	2.06e+21	5.96738	2.8405	3.04498	2.75654	4.43e+20	6.31701	2.74515	3.49074
mp-22961	Sr3SnO	0	0.349319	0.18198	2.65949	1.4891	1.65e+20	0.419009	0.200135	3.02936	0.257071	1.19e+20	0.380508	0.189238	2.85125
mp-9705	Dy2CdSe4	0.586296	2.07181	0.941015	3.26685	3.54934	5.23e+20	2.04935	0.979459	3.02652	1.79066	1.02e+20	2.0717	0.941445	3.26436
mp-9723	Tl2SiF6	4.9687	4.00679	1.75682	3.44431	5.17808	1.78e+21	4.3157	2.06777	3.01525	2.19458	2.4e+20	4.0377	1.78572	3.40001
mp-9721	Dy2CdS4	1.08769	2.54625	1.14211	3.3288	3.8452	6.33e+20	2.47942	1.19208	2.99962	1.95547	1.37e+20	2.54158	1.14527	3.30594
mp-567498	Nd2Zr2O7	3.3252	5.23031	2.14317	3.81248	5.01972	1.14e+21	4.80139	2.30869	2.99919	3.2111	4.18e+20	5.10836	2.19259	3.55619
mp-9816	TaCu3Te4	1.1379	1.51354	0.721827	3.03629	3.2858	6.14e+20	1.72705	0.830509	2.99875	1.48943	6.91e+19	1.49727	0.715332	3.02821
mp-6586	Mg(ScS2)2	1.5651	2.48718	1.14222	3.21321	3.92748	7.9e+20	2.5004	1.20278	2.99734	1.85071	1.29e+20	2.48795	1.14473	3.20412
mp-27851	Sr3PbO	0	0.324981	0.175013	2.53034	1.4231	1.77e+20	0.407739	0.196581	2.98718	0.228397	1.26e+20	0.366544	0.184964	2.78971
mp-9911	CaS	2.38911	1.80956	0.955665	2.60556	3.29902	1.67e+22	4.03896	1.95058	2.97961	1.51894	9.41e+19	1.80893	0.955241	2.60592
mp-29379	Y2CdS4	1.1108	2.53921	1.14555	3.30008	3.82296	6.35e+20	2.4689	1.19245	2.97917	1.94262	1.39e+20	2.53382	1.1485	3.27691
mp-6299	EuH3Pd	0	0.0930747	0.0072718	45.7915	10.6262	1.12e+23	25.6736	12.446	2.9627	0.171846	1.1e+23	25.9506	12.8156	2.88148
mp-3172	Sc2Ge2O7	3.6886	6.8505	2.90371	3.62371	5.76372	1.83e+21	6.28307	3.05157	2.95442	3.04338	5.04e+20	6.72476	2.93959	3.46007
mp-29524	YbTe	1.4688	1.07563	0.596123	2.42375	2.61581	1.35e+22	2.98626	1.45078	2.95318	1.25084	5.06e+19	1.0682	0.588525	2.44528
mp-1999	Ta2Cd2O7	2.02	6.51236	2.64079	3.87265	5.67615	1.73e+21	6.17871	3.00551	2.94761	3.06735	4.39e+20	6.43832	2.71428	3.65323
mp-9570	NaMgF3	5.9262	9.27469	3.98034	3.55687	6.88605	3.46e+21	8.47422	4.12946	2.93975	3.00968	6.24e+20	9.14243	4.00289	3.45169
mp-581024	Lu2MgSe4	1.4771	2.21622	1.02034	3.20114	3.60722	5.93e+20	2.2021	1.07508	2.93153	1.81241	1.16e+20	2.21571	1.02208	3.19183
mp-21855	AgAu3	0	0.0414741	0.00233579	74.8195	0.401962	7.3e+21	0.372318	0.182096	2.92361	0.00146163	7.22e+21	0.36986	0.180483	2.93361
mp-14036	Ba2CaMoO6	2.2617	6.45835	2.85392	3.40424	5.75905	2.03e+21	6.06697	2.97655	2.90996	2.71006	4.31e+20	6.40262	2.87507	3.32326
mp-10191	Ba2LiReO6	1.8199	7.01296	3.09603	3.40915	6.0649	2.45e+21	6.65892	3.27292	2.90203	2.74381	4.82e+20	6.96742	3.12484	3.32939
mp-29398	Au2S	1.9021	3.73548	1.72746	3.17987	4.59997	1.23e+21	3.64696	1.793	2.90085	2.11388	2.21e+20	3.7275	1.7339	3.15202
mp-541908	TaCu3S4	1.9547	2.59864	1.18683	3.23993	3.99357	8.55e+20	2.72538	1.34165	2.89523	1.90091	1.36e+20	2.6065	1.19487	3.22187
mp-21084	Ba2MnTeO6	0.936697	2.16651	0.969948	3.33825	3.29064	3.71e+20	2.02966	0.999258	2.8948	1.97907	1.18e+20	2.15704	0.972179	3.30498
mp-562072	BaF2	6.6232	16.9648	7.01394	3.76166	8.77131	6.5e+21	15.4874	7.63342	2.88993	4.18471	1.52e+21	16.6402	7.14511	3.55406
mp-17250	Cs2PtI6	0.648406	3.53935	1.55358	3.43862	4.12771	7.16e+20	3.26499	1.60966	2.88883	2.40637	2.22e+20	3.48842	1.56457	3.32928
mp-23659	AcOF	4.2614	13.3565	5.8277	3.46972	8.26712	6.13e+21	12.6238	6.2304	2.8841	3.29563	9.86e+20	13.2693	5.89843	3.37417
mp-555863	TaCu3Se4	1.6313	2.17494	1.00834	3.16785	3.74781	8.02e+20	2.37932	1.17494	2.88175	1.75084	1.08e+20	2.17757	1.01062	3.16281
mp-27839	Tm2MgSe4	1.4057	2.22285	1.03499	3.14747	3.57247	5.91e+20	2.21974	1.09719	2.87759	1.80147	1.14e+20	2.22274	1.03679	3.13902
mp-812	CsCl	4.98811	11.565	4.95879	3.5617	7.6166	4.59e+21	11.1058	5.49218	2.87547	3.38663	9.63e+20	11.515	5.06717	3.4257
mp-556672	NbCu3S4	1.69049	2.55889	1.17929	3.19628	3.91773	8.11e+20	2.6698	1.32389	2.86379	1.88745	1.4e+20	2.56725	1.18801	3.17666
mp-557964	K2SeBr6	1.7095	4.31192	1.88724	3.45356	4.57736	1.01e+21	4.01523	1.99274	2.86016	2.49464	2.65e+20	4.25697	1.90579	3.33841
mp-3536	Xe	6.2086	11.2991	4.94592	3.45297	7.50583	4.6e+21	10.6387	5.28416	2.85673	3.29318	9.37e+20	11.1972	5.00697	3.34427
mp-4155	RbGeI3	0.999705	0.372497	0.279054	1.54224	1.85692	3.22e+20	0.685671	0.340688	2.85522	0.408039	7.96e+18	0.19093	0.205667	0.894467
mp-216	Ba2CaTeO6	2.9977	6.34842	2.83996	3.34219	5.65893	2.02e+21	5.99741	2.98261	2.85135	2.65098	4.3e+20	6.29719	2.86457	3.25934
mp-1239	Nb3Sb2Te5	0.8429	4.05321	1.83989	3.26971	4.41692	9.53e+20	3.67877	1.83095	2.84799	2.42617	2.68e+20	3.98148	1.83385	3.19904
mp-11718	LiFeO2	1.6167	8.62797	3.74875	3.49167	6.47585	3e+21	7.93618	3.95336	2.84424	2.99451	6.22e+20	8.51229	3.79087	3.36482
mp-27718	Cs2HfI6	2.206	3.67298	1.62342	3.40314	4.18585	7.81e+20	3.39548	1.69174	2.84348	2.3765	2.23e+20	3.62368	1.63554	3.29785
mp-570231	MnTlCl3	1.1484	1.53521	0.711291	3.1709	2.77996	2.43e+20	1.44927	0.722753	2.8395	1.73485	7.43e+19	1.55118	0.709532	3.23248
mp-568544	SrTe	1.7736	1.38303	0.739519	2.55753	2.90179	9.43e+21	3.04352	1.518	2.83893	1.38935	6.82e+19	1.37866	0.735064	2.56861
mp-626412	Ba2CaWO6	3.18	6.43905	2.87274	3.35573	5.67443	2.08e+21	6.02341	3.00459	2.83848	2.70695	4.46e+20	6.37908	2.89594	3.26929
mp-16137	KF	5.99561	18.9686	8.03073	3.63012	9.303	8.15e+21	17.6206	8.792	2.83727	4.43142	1.93e+21	18.7059	8.20118	3.44472
mp-3807	CoO	0.587997	2.91802	1.73241	2.18604	3.95976	1.44e+22	4.82584	2.40865	2.83594	1.63999	1.75e+20	2.91577	1.73743	2.17405
mp-10607	BaLiPrTeO6	3.13819	5.29855	2.45201	3.17652	5.45123	2.11e+21	5.30854	2.65034	2.83473	2.34061	3.27e+20	5.31323	2.47545	3.14454
mp-20694	K2PtBr6	1.2017	4.27854	1.87238	3.45424	4.48441	9.69e+20	3.93085	1.96531	2.82867	2.57773	2.97e+20	4.20061	1.89236	3.30723
mp-558585	Lu2MgS4	1.98181	2.76559	1.28653	3.15175	3.90851	7.89e+20	2.74677	1.37668	2.81827	1.94117	1.6e+20	2.76393	1.29384	3.12226
mp-1394	YbCsF3	7.0491	16.4298	7.05036	3.5574	8.51603	6.37e+21	14.8412	7.44022	2.81724	4.10513	1.56e+21	16.0763	7.13472	3.3823
mp-550579	Zn(InS2)2	1.1259	5.72617	2.43716	3.60139	5.13012	1.42e+21	5.33179	2.67911	2.80752	2.82964	3.76e+20	5.64476	2.48831	3.41673
mp-559352	Cu2O	0.504703	3.78558	1.80582	3.03518	4.65628	1.46e+21	3.85989	1.94114	2.804	2.04389	2.29e+20	3.80581	1.81964	3.02478
mp-30160	ScF3	6.0792	10.2115	4.54274	3.37021	6.93213	3.94e+21	9.26582	4.66178	2.8022	3.03541	7.14e+20	10.0403	4.55335	3.27433
mp-5033	Cu2O	0.499696	3.7991	1.8104	3.0399	4.65344	1.45e+21	3.86452	1.94463	2.80147	2.05033	2.26e+20	3.81895	1.82366	3.03039
mp-7787	NbCu3Se4	1.3951	2.11631	0.994589	3.10387	3.56861	7.03e+20	2.25036	1.13271	2.80029	1.74107	1.09e+20	2.11863	0.997036	3.09753
mp-10731	K3Bi	0.131295	0.640515	2.467	0.132294	7.0332	3.89e+21	9.72497	4.90175	2.79451	2.67946	1.5e+21	10.2012	4.92216	2.98364
mp-13798	Pr2Zr2O7	3.4581	5.19064	2.2363	3.53619	4.74531	1.1e+21	4.77964	2.41412	2.78582	3.11858	4.4e+20	5.06077	2.29513	3.27427
mp-16238	K2SnBr6	1.17091	4.32998	1.92226	3.38073	4.48656	1.01e+21	3.99203	2.0182	2.78191	2.49804	2.9e+20	4.26043	1.94167	3.25026
mp-10748	K2PtCl6	1.8478	6.87311	3.0442	3.3925	5.52306	1.89e+21	6.22308	3.16615	2.75557	3.00178	5.29e+20	6.72138	3.0714	3.23731
mp-4394	YbCsBr3	4.3502	4.75291	2.16222	3.25904	4.77335	1.31e+21	4.45782	2.27001	2.75195	2.39396	3.06e+20	4.70071	2.18185	3.16234
mp-571102	Cs2TeI6	1.3886	3.7392	1.67841	3.32522	4.18909	8.44e+20	3.53164	1.79876	2.75109	2.35826	2.38e+20	3.6996	1.7	3.21038
mp-1529	Y3Sb4Au3	0.583004	3.20235	1.40276	3.44929	3.8693	6.5e+20	3.06475	1.56131	2.75017	2.40889	2.05e+20	3.18057	1.43324	3.30582
mp-11151	Co3S4	0	0.0892265	0.0225945	7.84758	1.50157	2.73e+21	1.05721	0.539109	2.74618	0.0413735	2.73e+21	1.05721	0.539109	2.74618
mp-30530	Zr3Ni3Sb4	0.441396	4.4807	2.03692	3.26256	4.48176	9.54e+20	4.36628	2.22727	2.74478	2.92971	4.14e+20	4.58908	2.11602	3.1938
mp-27632	Y2MgSe4	1.3007	2.26396	1.08091	3.03122	3.50031	6.21e+20	2.26791	1.15818	2.74016	1.78889	1.19e+20	2.26413	1.08376	3.01963
mp-6623	Li2ZnCl4	4.1418	6.13219	2.66996	3.48069	5.34073	1.77e+21	5.81145	2.97551	2.72951	2.71736	4.05e+20	6.0679	2.72377	3.32507
mp-5146	In2Pt2O7	2.04919	8.05684	3.77314	3.12028	6.39495	3.24e+21	8.03817	4.11576	2.72936	2.75287	6.3e+20	8.10408	3.83509	3.07179
mp-3319	CsHgBr3	0	0.142526	0.0574455	3.90801	1.16111	5.51e+20	0.489795	0.252489	2.70184	0.0735012	5.14e+20	0.471214	0.239652	2.75711
mp-13853	FeF3	2.8453	2.80458	1.31233	3.12417	3.50682	5.47e+20	2.58013	1.33657	2.68209	2.07666	1.63e+20	2.77068	1.31146	3.07078
mp-17972	Rb2O	1.3243	11.7577	5.29172	3.312	7.13326	4.32e+21	10.7929	5.60225	2.674	3.36857	1.01e+21	11.5548	5.35613	3.16861
mp-542435	K3Sb	0.677305	11.5488	5.27722	3.23741	6.93261	3.95e+21	10.2475	5.32257	2.67143	3.43628	1.04e+21	11.2803	5.28599	3.11739
mp-31149	Rb2PdBr6	0.647903	4.37072	2.00715	3.21335	4.30845	9.49e+20	4.00592	2.0865	2.66027	2.53609	3.16e+20	4.28691	2.02687	3.07593
mp-23021	KMgF3	6.95371	9.47408	4.3704	3.19171	6.4796	3.44e+21	8.72273	4.54973	2.65461	2.90477	6.65e+20	9.34015	4.39936	3.09348
mp-865	Sc2Mn2O7	1.0573	4.01747	1.89314	3.09139	4.48414	1.21e+21	4.10389	2.1481	2.64066	2.27786	2.71e+20	4.05522	1.93532	3.03315
mp-6270	NaPrTe2	1.05939	1.87244	0.92665	2.87235	3.08379	4.51e+20	1.85958	0.974254	2.63703	1.65731	1.03e+20	1.87237	0.927223	2.86952
mp-10182	In2HgS4	0.354306	4.11816	1.88221	3.23633	4.21138	8.96e+20	4.00375	2.10987	2.61406	2.55801	2.98e+20	4.19285	1.94424	3.16694
mp-5621	CsCaBr3	4.40439	4.79345	2.25698	3.09515	4.59645	1.29e+21	4.48498	2.37014	2.60304	2.36207	2.97e+20	4.74049	2.27663	3.00465
mp-22186	Rb3Sb	0.434103	5.9679	2.69393	3.29726	5.08892	1.64e+21	5.80763	3.07609	2.59417	2.94849	5e+20	6.01999	2.79755	3.15666
mp-23465	CsSmO2	2.9092	9.82194	4.70219	3.01888	6.15862	2.91e+21	8.80491	4.67809	2.58217	2.98297	8.11e+20	8.95089	4.24825	3.05832
mp-27829	Tl2SnCl6	2.481	5.55894	2.5942	3.13677	4.81688	1.44e+21	5.16907	2.75197	2.57425	2.61482	4.05e+20	5.46872	2.62936	2.99954
mp-635441	BaLiH3	2.266	0.774122	0.406352	2.62942	1.99134	1.54e+20	0.782123	0.417031	2.56839	1.17581	3.19e+19	0.763155	0.392742	2.70868
mp-12525	Lu2Pb2O7	0.8772	5.18059	2.419	3.13412	4.61388	1.26e+21	4.81925	2.5724	2.56426	2.60358	3.78e+20	5.09618	2.45389	2.99284
mp-2514	Ca3GeO	0	0.396142	0.190667	2.99477	1.79987	4.87e+21	1.61089	0.860194	2.56273	0.393315	6.87e+19	0.361908	0.181521	2.81519
mp-555740	Lu2Sn2O7	2.61291	4.49525	2.12519	3.07634	4.48183	1.23e+21	4.35615	2.32717	2.56101	2.35661	2.98e+20	4.47111	2.15751	2.98328
mp-560516	K2TiCl6	2.0826	5.42198	2.53761	3.12321	4.70261	1.36e+21	4.97165	2.66084	2.554	2.60276	3.85e+20	5.32126	2.56422	2.98943
mp-27834	TlCd(NO2)3	2.1494	4.36142	2.06483	3.06984	4.2254	1.04e+21	3.93423	2.11488	2.53724	2.35135	2.83e+20	4.2624	2.06521	2.96507
mp-7251	RbCd(NO2)3	2.32099	4.3204	2.04531	3.07007	4.19171	1.03e+21	3.8957	2.10035	2.52604	2.34758	2.81e+20	4.21828	2.05351	2.94413
mp-23405	H8Pd(NCl3)2	1.1199	5.15137	2.42537	3.09539	4.49362	1.19e+21	4.7145	2.54601	2.51979	2.65199	3.9e+20	5.0361	2.45559	2.93702
mp-6192	LiCa4(BN2)3	2.2125	1.80462	0.937651	2.67004	3.0096	5.44e+20	1.83582	0.991688	2.51874	1.54245	9.47e+19	1.80411	0.937258	2.67058
mp-679	RbMgF3	6.9446	10.3	4.93592	3.01442	6.65255	4.38e+21	9.70974	5.26538	2.50418	2.86079	7.95e+20	10.1871	4.98756	2.91908
mp-561543	KMnF3	2.6874	2.57111	1.26291	2.90484	3.23804	4.82e+20	2.37196	1.28824	2.49842	1.93982	1.44e+20	2.5478	1.26611	2.85456
mp-18062	CsScO2	2.95961	5.38679	2.53743	3.09316	4.56359	1.27e+21	4.94765	2.68983	2.49467	2.62503	3.77e+20	5.28176	2.57234	2.94222
mp-12642	Ba2NaReO6	1.8707	7.14769	3.46532	2.96233	5.41303	2.25e+21	6.72146	3.66254	2.48612	2.69833	5.46e+20	7.07146	3.50554	2.86504
mp-20620	Li3VS4	1.8951	4.69176	2.30823	2.89791	4.481	1.35e+21	4.48203	2.44455	2.48264	2.29049	3.15e+20	4.66183	2.33088	2.82849
mp-12640	Mg3P2	1.60681	3.18861	1.54047	2.97798	3.54572	6.2e+20	2.96697	1.62318	2.47127	2.16984	2.02e+20	3.14453	1.55461	2.87674
mp-22184	FeS2	0.442906	11.345	7.82863	1.74452	7.89246	6.79e+21	14.8485	8.13172	2.46746	3.60182	1.66e+21	16.3159	8.19434	2.80962
mp-559426	Tm2Pb2O7	0.913704	5.13887	2.46031	3.01868	4.50136	1.28e+21	4.77711	2.61701	2.46627	2.54805	3.89e+20	5.0531	2.49661	2.87946
mp-4408	Mg3NF3	3.5817	4.82655	2.77391	2.29518	5.80673	8.49e+21	7.46642	4.10181	2.45587	1.86535	3.19e+20	4.90405	2.82248	2.29027
mp-4081	K2SnCl6	2.4635	5.55865	2.67257	2.99958	4.67261	1.47e+21	5.14427	2.82895	2.45215	2.5539	4.16e+20	5.46186	2.70757	2.8651
mp-12637	MoF3	2.97439	3.66973	1.81985	2.8635	3.83985	8.69e+20	3.38586	1.86879	2.43872	2.10855	2.25e+20	3.62147	1.82802	2.7884
mp-14070	H8Pt(NCl3)2	1.7978	6.92141	3.33101	2.99522	5.06867	1.82e+21	6.29403	3.47712	2.43537	2.86679	5.49e+20	6.76036	3.36607	2.84623
mp-6255	Tm2Sn2O7	2.655	4.51597	2.19585	2.94933	4.36814	1.29e+21	4.38314	2.42223	2.4342	2.3197	3.13e+20	4.49251	2.2328	2.85404
mp-6059	RbMnF3	2.96561	2.56354	1.27841	2.83958	3.17808	4.82e+20	2.36197	1.30589	2.43248	1.92089	1.44e+20	2.53949	1.28176	2.78875
mp-552200	CsI	3.8572	7.74976	3.67423	3.06325	5.51709	2.43e+21	7.38292	4.09435	2.42139	3.08369	7.05e+20	7.68107	3.78342	2.89272
mp-6065	Y2Ge2O7	2.94761	6.53845	3.14256	3.00115	4.9089	1.68e+21	5.94461	3.29703	2.42103	2.87357	5.48e+20	6.38117	3.18815	2.83167
mp-4590	K2PdCl6	1.2004	5.26028	2.5478	2.96664	4.40758	1.22e+21	4.80894	2.67122	2.41552	2.64282	3.99e+20	5.14207	2.57902	2.8153
mp-504729	MgAl2O4	5.1111	9.33447	4.44821	3.03988	5.84084	2.84e+21	8.5284	4.74801	2.40732	3.15508	7.64e+20	9.14436	4.5183	2.87917
mp-7831	SnH8(NCl3)2	2.31899	5.28781	2.5637	2.96219	4.45954	1.3e+21	4.86978	2.71265	2.40532	2.53648	3.95e+20	5.18494	2.59865	2.81835
mp-540850	Mg3As2	1.43101	2.82893	1.41573	2.82463	3.34273	5.67e+20	2.67298	1.48896	2.40529	1.98847	1.75e+20	2.80509	1.42593	2.75913
mp-12533	Er2Sn2O7	2.6793	4.53303	2.24233	2.87432	4.31173	1.25e+21	4.42541	2.47345	2.39318	2.29477	3e+20	4.51501	2.27945	2.78769
mp-27833	SrNd2O4	3.6062	6.53836	3.06714	3.11246	4.90362	1.69e+21	6.11217	3.41848	2.39081	2.93655	5.17e+20	6.43446	3.15667	2.91022
mp-27832	KNa2Sb	0.672094	1.91527	1.04717	2.47355	3.06856	7.43e+20	2.03787	1.14051	2.38846	1.49729	1.05e+20	1.91639	1.04822	2.47199
mp-569782	Er2Pb2O7	0.928398	5.09342	2.49465	2.91743	4.41688	1.33e+21	4.73109	2.65044	2.38487	2.48741	3.76e+20	5.01419	2.52751	2.79423
mp-570213	Dy2Ge2O7	2.9732	6.58575	3.20499	2.94556	4.84144	1.63e+21	5.99824	3.36231	2.38275	2.87046	5.27e+20	6.43165	3.24997	2.78397
mp-20845	Ho2Ge2O7	3.0055	6.62007	3.21365	2.95662	4.85055	1.68e+21	5.98632	3.36556	2.37222	2.88778	5.45e+20	6.451	3.25708	2.78739
mp-13001	Dy2Sn2O7	2.714	4.73372	2.35009	2.85876	4.36337	1.32e+21	4.62883	2.60712	2.36573	2.3356	3.39e+20	4.71493	2.3962	2.76013
mp-555785	Ba4GeAs4	0.824206	3.30834	1.63785	2.8708	3.52624	6.62e+20	3.1279	1.76237	2.36447	2.24872	2.34e+20	3.27077	1.66767	2.74669
mp-6361	Rb2SnBr6	1.3126	4.50429	2.22554	2.8793	4.04268	9.84e+20	4.16223	2.3456	2.36378	2.40598	3.22e+20	4.41901	2.2545	2.74418
mp-542951	Y2Pb2O7	0.998699	4.9114	2.45809	2.8243	4.31143	1.25e+21	4.60301	2.59705	2.35962	2.40127	3.56e+20	4.8458	2.48732	2.71927
mp-3050	Cs2LiLuCl6	5.33881	5.42326	2.66556	2.90208	4.46688	1.38e+21	4.97576	2.81079	2.3553	2.50083	3.89e+20	5.32259	2.69642	2.77335
mp-5965	In6Ge2PtO9	1.33519	6.62776	3.16487	3.03052	4.77002	1.59e+21	5.93792	3.35472	2.35487	3.03997	5.46e+20	6.42636	3.21883	2.82098
mp-6231	Lu2Pt2O7	1.7029	4.33861	2.13205	2.9029	4.02903	9.94e+20	4.11712	2.32692	2.35352	2.4065	3.19e+20	4.28891	2.178	2.76333
mp-7531	Ca3PCl3	1.8419	1.32413	0.728342	2.45129	2.58256	6.09e+20	1.49945	0.847608	2.3529	1.32679	6.47e+19	1.31279	0.7193	2.46562
mp-5444	Dy2Pb2O7	0.958494	5.05285	2.53247	2.81831	4.33673	1.26e+21	4.73108	2.67572	2.35114	2.42922	3.55e+20	4.98441	2.56234	2.7131
mp-6073	CsSnI3	0.464906	0.225717	0.223567	1.01446	1.28673	3.57e+20	0.530482	0.300029	2.35105	0.274399	3.08e+18	0.0866605	0.104879	0.7511
mp-14292	CaSe	2.0869	1.50789	0.827835	2.45833	2.62963	4.23e+20	1.53652	0.869535	2.34897	1.40243	7.53e+19	1.50529	0.824924	2.46497
mp-608555	Ca3AsCl3	1.8384	1.2214	0.673693	2.44114	2.45847	4.7e+20	1.34833	0.763361	2.34747	1.29185	5.8e+19	1.20769	0.66274	2.45991
mp-23067	Sc4C3	0.326999	0.483348	0.280264	2.26485	1.48613	2.93e+20	0.599034	0.340382	2.33468	0.844013	2.16e+19	0.437786	0.25357	2.26854
mp-8269	CoAs3	0	0.236023	0.34107	0.575661	2.30197	1.29e+21	1.50348	0.8559	2.32816	0.229179	1.23e+21	1.48179	0.843681	2.32763
mp-558168	Cs2LiYCl6	4.8987	5.47559	2.72907	2.842	4.4192	1.34e+21	5.03817	2.86849	2.32771	2.48823	4.06e+20	5.36753	2.76148	2.70987
mp-8351	Tl2Pt2O7	0.697496	4.12923	2.25165	2.48344	4.45573	2.2e+21	4.46948	2.54893	2.32193	1.90914	2.76e+20	4.16067	2.2776	2.46905
mp-23352	KMnF3	2.7828	2.6385	1.38463	2.63046	3.03137	4.87e+20	2.43105	1.3867	2.32122	1.84972	1.57e+20	2.60693	1.36214	2.64765
mp-17887	Ba4GeP4	1.0183	3.87838	1.92036	2.87012	3.73971	8.14e+20	3.62976	2.07116	2.32005	2.38506	2.85e+20	3.81573	1.95929	2.71781
mp-4396	Ho2Sn2O7	2.698	4.5628	2.28779	2.81658	4.27005	1.34e+21	4.45908	2.54602	2.31779	2.28023	3.24e+20	4.54479	2.33067	2.72301
mp-8414	Tb2Pb2O7	0.966698	5.06811	2.56438	2.77841	4.29453	1.26e+21	4.74156	2.70976	2.31465	2.42135	3.87e+20	4.98973	2.59836	2.66114
mp-557664	Lu3TlC	0	0.062199	0.145792	0.27866	2.71101	2.63e+21	2.22996	1.27621	2.30974	0.20536	1.84e+21	1.92832	1.12442	2.24582
mp-569814	Y2Sn2O7	2.752	4.6172	2.32256	2.80295	4.21228	1.23e+21	4.52804	2.59746	2.30166	2.32705	3.37e+20	4.59957	2.37645	2.69267
mp-2908	Na3SbSe4	0.976603	2.61865	1.43116	2.47505	3.34487	8.25e+20	2.6022	1.49787	2.2898	1.693	1.58e+20	2.61671	1.4362	2.4593
mp-8484	Ba4Na(SbO4)3	1.5181	5.39635	2.75336	2.74383	4.44331	1.45e+21	5.09814	2.93521	2.28908	2.45758	4.1e+20	5.33715	2.79506	2.63862
mp-29252	Mn(InS2)2	0.921704	2.6716	1.34282	2.80627	3.07188	4.6e+20	2.52153	1.45316	2.28574	2.10166	1.72e+20	2.64301	1.36532	2.69337
mp-581857	ZrSeO	1.95721	2.10349	1.15556	2.45596	3.00769	6.13e+20	2.11496	1.22158	2.2781	1.57614	1.17e+20	2.10408	1.15805	2.44909
mp-8594	CsH	2.6482	0.667769	0.714258	0.903974	2.85411	1.9e+21	2.20992	1.27718	2.27608	0.603876	3.4e+19	0.595483	0.655247	0.866356
mp-18594	CsGeBr3	1.1564	0.214738	0.26214	0.741419	1.3866	6.05e+20	0.690565	0.399456	2.27302	0.390006	7.03e+18	0.171448	0.190645	0.852829
mp-2973	Cd(RhO2)2	0.8489	9.58167	4.81613	2.80618	5.92942	3.51e+21	9.19851	5.33228	2.26573	2.96783	8.1e+20	9.52886	4.92954	2.68752
mp-3154	Bi2Pt2O7	0.793498	3.30694	1.78139	2.5293	3.70553	1.06e+21	3.2911	1.90789	2.2656	1.86134	2e+20	3.30569	1.79434	2.50055
mp-23147	MgO2	3.7324	7.58572	4.08045	2.53473	5.39114	3.11e+21	7.14414	4.16042	2.25019	2.43587	5.77e+20	7.51771	4.09017	2.49182
mp-8877	Li3NbS4	2.77	5.07072	2.63056	2.67629	4.30311	1.41e+21	4.7931	2.79199	2.24933	2.33277	3.77e+20	5.0184	2.66338	2.58642
mp-5373	Er2Pt2O7	1.54991	4.3225	2.18239	2.78742	3.89495	9.88e+20	4.09784	2.39047	2.24444	2.38248	3.15e+20	4.27263	2.23115	2.65002
mp-8876	Ag3PO4	0.174507	1.90733	1.77323	1.11555	4.00382	1.28e+21	3.96237	2.31271	2.2426	1.67453	4.62e+20	3.79715	2.13168	2.37741
mp-8878	K2MnCl6	1.0976	4.94936	2.59103	2.64007	4.17998	1.25e+21	4.66264	2.72478	2.23847	2.35469	3.91e+20	4.88864	2.62518	2.54123
mp-558206	Li3AlN2	2.93731	5.2888	2.61513	2.87605	4.10939	1.09e+21	4.87776	2.85051	2.23845	2.74611	4.3e+20	5.15329	2.68934	2.65251
mp-6968	CaTe	1.55359	1.1623	0.660712	2.33326	2.23836	2.93e+20	1.18586	0.693037	2.23828	1.26642	5.7e+19	1.15692	0.653357	2.35629
mp-28734	Ar	8.5108	18.3889	9.30588	2.77779	7.92845	8.4e+21	17.0208	9.94932	2.23758	3.64796	1.94e+21	18.1166	9.4431	2.65731
mp-5626	Ho2Pt2O7	1.5085	4.33268	2.2004	2.76301	3.86364	9.9e+20	4.09516	2.40864	2.21692	2.39391	3.15e+20	4.27983	2.24908	2.62501
mp-28782	Tb2Sn2O7	2.7237	4.63678	2.38024	2.7189	4.11977	1.26e+21	4.52409	2.66418	2.21285	2.30522	3.48e+20	4.61342	2.43653	2.60542
mp-28710	La2Hf2O7	4.2328	4.92251	2.4807	2.79524	3.94812	9.97e+20	4.59863	2.71297	2.20687	2.81601	4.66e+20	4.80201	2.57449	2.5474
mp-560894	NaF	6.0943	14.7059	8.13572	2.4302	7.9791	1.26e+22	15.6269	9.26049	2.19208	2.73184	1.17e+21	14.8039	8.23608	2.4098
mp-9191	Sr4Li(BN2)3	2.0894	1.81068	1.01664	2.3769	2.76494	5.39e+20	1.8746	1.11192	2.18904	1.47412	9.55e+19	1.81009	1.01597	2.37809
mp-6860	HfSO	2.8879	2.41973	1.34446	2.4145	3.11513	6.93e+20	2.42804	1.44244	2.18393	1.64983	1.46e+20	2.42025	1.35222	2.39452
mp-28980	YbMgNiH4	1.9011	4.95633	2.54259	2.7216	4.01236	1.12e+21	4.66176	2.77861	2.17312	2.49902	3.81e+20	4.88004	2.60524	2.56369
mp-9392	Cd(InS2)2	1.0566	5.14627	2.57639	2.82307	4.09859	1.21e+21	4.8493	2.89677	2.16595	2.47937	3.71e+20	5.07281	2.65411	2.64237
mp-579548	Na3PS4	2.2814	2.8799	1.62254	2.36468	3.32793	8.4e+20	2.8388	1.70079	2.15638	1.74809	1.87e+20	2.83226	1.60874	2.33599
mp-29078	Sm2Ge2O7	2.5589	6.45649	3.34556	2.68097	4.49071	1.6e+21	5.885	3.52667	2.15562	2.77082	5.6e+20	6.29181	3.4028	2.51425
mp-4086	NaSr4(BN2)3	1.9873	1.85003	1.0474	2.34747	2.757	5.5e+20	1.91054	1.14689	2.15007	1.48158	1.05e+20	1.85062	1.0487	2.34423
mp-615746	Ca3AsBr3	1.6657	1.16482	0.67539	2.26493	2.23762	3.66e+20	1.25152	0.752628	2.14429	1.24076	5.45e+19	1.15013	0.661352	2.29336
mp-2789	ZrSO	2.43081	2.39233	1.33949	2.38683	3.05576	6.85e+20	2.39929	1.44502	2.13951	1.64407	1.43e+20	2.39318	1.34736	2.36722
mp-23560	La2Zr2O7	3.74099	4.87476	2.51543	2.69781	3.89033	1.04e+21	4.5917	2.77146	2.13254	2.72118	4.46e+20	4.78777	2.61092	2.48319
mp-555730	Zr6CoCl15	1.09139	3.25971	1.76003	2.52051	3.41517	7.84e+20	3.28336	1.98897	2.12098	2.08056	2.55e+20	3.28829	1.81713	2.43432
mp-7971	Tb2Pt2O7	1.39841	4.31229	2.24822	2.65646	3.73731	9.78e+20	4.0724	2.46782	2.11986	2.36456	3.38e+20	4.25192	2.30585	2.50398
mp-5830	Sc2Pt2O7	1.8069	4.86209	2.53823	2.65118	3.97414	1.2e+21	4.60405	2.79933	2.10925	2.39175	3.83e+20	4.80004	2.60295	2.5042
mp-29052	Rb2ZrCl6	3.562	5.7521	3.06523	2.57066	4.19124	1.39e+21	5.30164	3.24243	2.09078	2.46607	4.53e+20	5.62901	3.11093	2.43396
mp-9765	RbCl	4.8393	10.5267	5.52642	2.62889	5.8193	3.89e+21	10.0818	6.1965	2.07532	3.15409	1.03e+21	10.4535	5.69238	2.48858
mp-29505	In6Ga2PtO8	0.559303	10.051	5.43882	2.51221	5.14718	2.5e+21	8.73098	5.39495	2.05879	3.38431	1.04e+21	9.63644	5.42345	2.36843
mp-29525	KCaF3	6.13911	10.9142	5.89402	2.51981	5.88406	4.34e+21	10.0379	6.20459	2.05777	2.83038	9.06e+20	10.7366	5.94848	2.4249
mp-21706	Mg6MnO8	2.3029	7.33479	4.11686	2.37811	4.88679	2.5e+21	6.93612	4.29196	2.05443	2.45711	6.32e+20	7.26688	4.15147	2.3159
mp-623862	Sr2TaCrO6	2.7536	5.45619	3.06123	2.37952	4.12991	1.58e+21	4.92083	3.05953	2.03975	2.19771	3.89e+20	5.34881	3.06158	2.30923
mp-14406	AcCrO3	1.7824	2.16107	1.79544	1.32053	3.49758	5.99e+21	4.1649	2.59142	2.03751	1.17978	1.49e+20	2.17041	1.80642	1.317
mp-29557	Ba4Na(BiO4)3	0.268005	3.60248	2.80833	1.45288	4.13867	1.48e+21	5.18098	3.2278	2.03356	2.20971	5.39e+20	5.33777	3.07644	2.28543
mp-557456	Cd7(P2Cl3)2	1.7985	2.93706	1.6373	2.40256	2.99556	5.64e+20	2.72774	1.7026	2.02784	1.94099	2.01e+20	2.89379	1.65174	2.31894
mp-568828	RbGaO2	2.46541	8.73523	4.72355	2.51483	5.25296	3.19e+21	8.1797	5.11134	2.02444	2.628	7.12e+20	8.61726	4.80263	2.40345
mp-23644	Ca3PN	0.8046	0.843307	0.514467	2.09866	1.78498	1.82e+20	0.864423	0.540837	2.02065	1.09607	3.99e+19	0.827584	0.493985	2.16844
mp-628819	Ba4Li(SbO4)3	1.45731	5.22414	2.89944	2.41853	4.0431	1.41e+21	4.99434	3.13069	2.01491	2.29776	3.98e+20	5.18218	2.95192	2.326
mp-23656	Lu2Mn2O7	1.0159	4.16141	2.32503	2.39452	3.73704	1.15e+21	4.206	2.64011	2.01081	2.12923	3.19e+20	4.19421	2.39503	2.31744
mp-31488	Rb2SnCl6	2.53539	5.79346	3.14562	2.49947	4.14279	1.5e+21	5.33985	3.35531	2.00768	2.46548	4.52e+20	5.67987	3.19606	2.36911
mp-14150	MnAl2O4	2.6578	3.19474	1.815	2.33529	3.2464	8e+20	3.09076	1.94223	2.00746	1.86839	2.23e+20	3.17866	1.83762	2.275
mp-27914	Rb2NaTmCl6	5.0573	5.39547	2.95314	2.46955	3.90728	1.21e+21	4.93536	3.10448	2.00445	2.42343	4.25e+20	5.26268	2.9949	2.32936
mp-14161	FeS2	0.456702	11.7353	8.98835	1.49183	7.00421	7.58e+21	14.9042	9.37961	2.00303	3.21195	1.77e+21	16.2501	9.38532	2.2783
mp-8076	Ca3BiN	0.373299	0.516091	0.335362	1.90905	1.35421	7.09e+19	0.513573	0.323964	1.99599	0.916389	2.28e+19	0.506392	0.305735	2.13164
mp-555726	Zn2Hg2OF6	0.8812	11.952	6.76253	2.3496	6.20426	5.66e+21	11.3904	7.18987	1.994	2.74492	1.04e+21	11.9186	6.87375	2.28321
mp-4812	Sm2Pt2O7	1.20659	4.32431	2.35826	2.48307	3.53951	9.3e+20	4.07737	2.58513	1.98082	2.33528	3.46e+20	4.25542	2.42338	2.32692
mp-23182	ZnIn2O4	1.1801	11.3791	6.20026	2.48626	5.51758	3.48e+21	10.0679	6.38892	1.9782	3.04996	1.03e+21	11.0191	6.25078	2.34054
mp-561202	RbCaF3	6.3974	11.1462	6.18675	2.41823	5.77497	4.38e+21	10.2955	6.53678	1.97662	2.82862	9.82e+20	10.9599	6.25364	2.32012
mp-554941	Gd2Zr2O7	2.7903	3.91608	2.18613	2.39752	3.43901	8.83e+20	3.77976	2.40237	1.9735	2.15806	3.1e+20	3.88954	2.24366	2.28251
mp-580631	Cs2NaYBr6	4.21751	4.61319	2.54623	2.43869	3.61218	1.01e+21	4.22386	2.68718	1.9707	2.27687	3.6e+20	4.50384	2.58399	2.30112
mp-9535	Yb(Na5Sn6)2	0.731401	2.76306	1.51072	2.47348	2.83983	4.84e+20	2.64937	1.68571	1.97034	1.98795	1.92e+20	2.73925	1.55309	2.34236
mp-15312	SnH8(NCl3)2	2.5506	5.55366	3.04277	2.46584	3.97567	1.37e+21	5.09499	3.24779	1.96487	2.439	4.46e+20	5.42907	3.0954	2.32281
mp-17064	Ca3AsN	0.716693	0.750895	0.470909	2.01355	1.63892	1.46e+20	0.762228	0.487277	1.95642	1.04	3.41e+19	0.734342	0.447389	2.10291
mp-505391	Ni2GeO4	2.1356	6.3232	3.74818	2.19116	4.67304	2.45e+21	6.71816	4.2965	1.95526	2.24007	5.99e+20	6.55369	3.90914	2.17074
mp-7977	Rb2TiCl6	2.1471	5.72881	3.18012	2.41787	3.9761	1.35e+21	5.26452	3.3669	1.95521	2.44847	4.72e+20	5.59162	3.23299	2.27457
mp-29250	Ba4SiAs4	0.985297	3.86897	2.15493	2.40571	3.25377	7.5e+20	3.56131	2.2901	1.93925	2.27697	3.11e+20	3.77033	2.19689	2.24831
mp-5472	Be4TeO7	1.2808	6.20094	3.49438	2.36392	4.25379	1.75e+21	5.89947	3.79682	1.93682	2.43518	5.24e+20	6.13792	3.57103	2.25342
mp-546973	Sm2Sn2O7	2.703	4.75753	2.64681	2.40984	3.82594	1.34e+21	4.67954	3.02269	1.92626	2.21696	3.64e+20	4.742	2.72246	2.29879
mp-2883	Rb2PdCl6	1.2844	5.51183	3.06049	2.41689	3.87141	1.3e+21	5.0182	3.24339	1.92453	2.50132	4.58e+20	5.36796	3.11161	2.26588
mp-28988	SiO2	5.5887	6.89896	3.811	2.43566	4.26216	1.73e+21	6.19708	4.01868	1.91494	2.76647	6.58e+20	6.66348	3.87818	2.25222
mp-4035	Y2Pt2O7	1.4655	4.49826	2.53355	2.36577	3.48263	9.59e+20	4.25063	2.77891	1.89177	2.31297	3.86e+20	4.42015	2.61294	2.20019
mp-647426	CsLiMoO4	4.42669	8.30152	4.69405	2.35188	4.64745	2.36e+21	7.51475	4.93829	1.87718	2.75884	7.65e+20	8.07098	4.76268	2.20603
mp-5478	Li3BiS3	2.5678	3.65223	2.28125	2.02572	3.18962	9.21e+20	3.40086	2.23748	1.87389	1.71883	2.27e+20	3.44995	2.03804	2.20242
mp-29008	Tm2Mn2O7	1.0021	4.20037	2.46147	2.22915	3.55737	1.16e+21	4.24038	2.8072	1.85651	2.08127	3.5e+20	4.23469	2.54771	2.14293
mp-24721	Rb2PbCl6	1.254	5.67318	3.22688	2.33113	3.8658	1.41e+21	5.23559	3.47029	1.8531	2.37789	4.54e+20	5.55389	3.28884	2.19448
mp-10159	In2HgO4	0.148003	0.282708	2.09842	0.0494503	5.16169	3.49e+21	9.16952	6.09525	1.84515	1.9925	1.48e+21	9.12276	5.70611	2.02152
mp-13687	Pr2Sn2O7	2.6415	5.60818	3.16455	2.3592	4.01707	1.65e+21	5.56332	3.70297	1.84152	2.35294	4.73e+20	5.61272	3.29635	2.22182
mp-3834	Nd2Pt2O7	1.0846	4.35434	2.49208	2.30962	3.33781	8.87e+20	4.07742	2.71571	1.83973	2.31799	3.56e+20	4.26815	2.56206	2.15018
mp-24084	K2H6Pt	4.0232	9.52101	5.38151	2.35325	4.75745	2.5e+21	8.60444	5.73848	1.83607	3.11506	9.96e+20	9.18309	5.50826	2.15259
mp-23703	CaMgNiH4	1.86969	5.59862	3.16275	2.35518	3.76205	1.3e+21	5.15485	3.44592	1.82964	2.47448	4.81e+20	5.45736	3.24735	2.17861
mp-9619	LiMgH6Ir	3.4054	5.47464	3.23162	2.20497	10.18	6.79e+22	33.112	22.1943	1.82228	2.24861	4.49e+20	5.39713	3.32163	2.07118
mp-566285	CsCaF3	6.89541	13.9271	8.03389	2.28245	5.9608	5.34e+21	12.7536	8.55039	1.82166	3.21659	1.45e+21	13.639	8.15989	2.16096
mp-13654	Na10CaSn12	0.6714	2.79804	1.62169	2.26637	2.72366	5.02e+20	2.70108	1.81153	1.8207	1.86264	1.84e+20	2.77899	1.66161	2.16291
mp-9203	Li3CuS2	2.0526	3.0122	1.78039	2.20066	2.83449	5.9e+20	2.83415	1.90176	1.81928	1.93574	2.29e+20	2.96882	1.81049	2.09982
mp-632250	Rb2PtCl6	1.93629	6.97911	4.01741	2.28971	4.15134	1.82e+21	6.30189	4.2483	1.80669	2.63035	6.35e+20	6.77095	4.08361	2.13505
mp-5238	Nd2Sn2O7	2.6688	5.02038	2.91115	2.26469	3.74494	1.4e+21	4.98399	3.36699	1.80096	2.20421	4.06e+20	5.01622	3.01569	2.14529
mp-20463	K2LiAlF6	7.4418	9.75447	5.6837	2.24832	4.90029	2.98e+21	8.93735	6.04308	1.79856	2.82265	9.55e+20	9.51327	5.78434	2.10918
mp-672234	KSi	1.2619	2.35576	1.42261	2.13093	2.40414	3.53e+20	2.1496	1.45426	1.7971	1.79249	1.61e+20	2.30631	1.43041	2.04732
mp-8399	Ga4GeS4	1.72941	1.84309	1.13813	2.06078	2.15407	2.55e+20	1.71685	1.16176	1.79649	1.64579	1.24e+20	1.82409	1.14126	2.02066
mp-13815	Zn(RhO2)2	0.958099	9.13028	5.22496	2.30994	5.03072	3.45e+21	9.00788	6.1046	1.79245	2.75896	9.11e+20	9.12338	5.44576	2.16843
mp-10175	MnBr2	1.5308	7.08557	4.24664	2.15523	4.12983	1.81e+21	6.34616	4.30372	1.79061	2.51753	6.59e+20	6.8586	4.26621	2.0384
mp-6952	Cs2SnBr6	1.4389	4.74087	2.76566	2.24434	3.44174	1.07e+21	4.35903	2.96004	1.78706	2.24355	3.75e+20	4.63318	2.81776	2.10845
mp-16267	K2O	1.7109	13.3708	7.74824	2.26689	5.70875	4.8e+21	12.1783	8.27261	1.78615	3.1955	1.4e+21	13.0428	7.88559	2.1272
mp-13800	La2Sn2O7	2.66491	4.67499	2.75464	2.21093	3.58913	1.28e+21	4.57139	3.10573	1.78578	2.13465	3.82e+20	4.65278	2.83383	2.10381
mp-7562	Hg3(TeBr)2	1.6995	6.54107	3.81097	2.24865	4.10513	1.85e+21	6.22095	4.24367	1.7749	2.3757	5.42e+20	6.46552	3.92519	2.11404
mp-31451	Cs2NaHoCl6	5.2906	5.60552	3.31073	2.20312	3.67787	1.34e+21	5.12971	3.52435	1.75599	2.32165	4.71e+20	5.46396	3.37045	2.0641
mp-30055	RbBr	4.1927	8.0167	4.83137	2.13741	4.68706	2.94e+21	7.99949	5.49929	1.75442	2.50023	7.41e+20	8.03717	4.98526	2.04703
mp-15802	Na10SrSn12	0.675904	2.99683	1.77963	2.18524	2.76832	5.91e+20	2.9055	2.00876	1.73956	1.85782	2.08e+20	2.97875	1.83119	2.07468
mp-16363	Hf(BH4)4	5.7442	4.82098	3.00442	2.03265	3.6341	1.47e+21	4.76534	3.30219	1.73355	2.0071	3.97e+20	4.81852	3.06921	1.96712
mp-22356	CdIn2O4	0.9135	11.7683	7.00491	2.17755	5.35539	4.45e+21	10.7938	7.49939	1.72673	2.64536	9.69e+20	11.5512	7.10329	2.07372
mp-557865	Cs2NaErCl6	5.3478	5.59138	3.34301	2.16307	3.62224	1.33e+21	5.11411	3.56245	1.72001	2.3075	4.68e+20	5.44988	3.4042	2.02562
mp-15661	Ag3AuS2	0.180303	1.63324	1.08731	1.84095	2.26378	3.89e+20	1.81795	1.2683	1.71609	1.30036	1.58e+20	1.71824	1.13118	1.87209
mp-8402	TbCs2NaCl6	5.2045	5.63959	3.41406	2.12307	3.58845	1.3e+21	5.17561	3.63038	1.70221	2.29366	4.94e+20	5.48779	3.48053	1.97983
mp-565952	KI	3.8513	5.19398	3.34568	1.9343	4.0393	2.77e+21	5.63775	3.96719	1.69408	1.87311	3.88e+20	5.24518	3.41638	1.90236
mp-17926	MnS	0	0.0116024	0.030876	0.230352	1.15396	8.32e+21	1.61565	1.13692	1.69405	0.0325683	4.5e+21	1.31125	0.99167	1.52048
mp-34418	FeF3	2.743	2.90788	1.84112	1.98491	2.60776	5.54e+20	2.66088	1.89048	1.66986	1.7513	2.07e+20	2.84893	1.85231	1.90745
mp-17114	Cs2H6Pt	3.9357	6.79757	4.12929	2.11211	3.88046	1.72e+21	6.18391	4.39372	1.66973	2.55575	6.48e+20	6.59156	4.21411	1.95625
mp-568670	Li9S3N	2.4272	6.31304	3.02052	3.02158	10.4138	3.81e+22	40.7226	28.9372	1.66943	3.47509	3.61e+22	156.633	199.595	0.695186
mp-15724	KClO4	5.128	8.77716	5.31784	2.12045	4.38822	2.46e+21	7.99535	5.68358	1.66849	2.75185	8.46e+20	8.53153	5.4282	1.97041
mp-10811	Hg3(SeCl)2	1.77201	6.09734	3.67406	2.13791	3.74087	1.57e+21	5.66433	4.02746	1.66792	2.35732	5.41e+20	5.96715	3.77773	1.9852
mp-567273	Cs2NaSmCl6	5.0722	5.7193	3.50645	2.08311	3.56857	1.34e+21	5.24814	3.73404	1.66625	2.27993	4.67e+20	5.57982	3.5692	1.95467
mp-2943	Ho2Mn2O7	0.941201	4.16689	2.61494	2.01152	3.29963	1.16e+21	4.21696	3.00332	1.66378	1.995	3.47e+20	4.20277	2.71145	1.92974
mp-5889	Gd2Ti2O7	2.64429	3.45362	2.16516	2.01454	2.96342	8.32e+20	3.41833	2.4347	1.66361	1.82686	2.52e+20	3.44797	2.22018	1.93536
mp-3200	Hg3(SCl)2	1.9324	6.51258	4.01762	2.06384	3.88736	1.81e+21	6.11751	4.37216	1.65508	2.32734	5.87e+20	6.40678	4.11836	1.94032
mp-567185	KBr	4.3102	6.76777	4.37225	1.9258	4.48422	3.74e+21	7.26562	5.20334	1.65	2.05735	5.78e+20	6.84349	4.48707	1.88353
mp-570135	KCl	5.027	8.44914	5.41193	1.9507	4.84645	4.11e+21	8.8105	6.31333	1.64859	2.28036	7.37e+20	8.52321	5.56023	1.89787
mp-571056	KVF3	2.08379	5.37882	3.4427	1.95291	3.54332	1.47e+21	4.98003	3.58459	1.63753	2.03565	4.37e+20	5.27711	3.47705	1.86972
mp-571246	RbI	3.77699	5.90407	3.79747	1.93859	4.0414	2.45e+21	6.15775	4.43414	1.63651	2.04548	4.83e+20	5.95628	3.90419	1.88437
mp-628768	KGe	0.910602	2.28714	1.47632	1.92828	2.2433	3.52e+20	2.10671	1.52062	1.63071	1.68287	1.6e+20	2.24471	1.48724	1.85426
mp-23592	Na3ClO	2.0299	12.7137	7.91448	2.03599	5.33904	4.83e+21	11.8272	8.54505	1.62836	2.93566	1.43e+21	12.5198	8.10319	1.92049
mp-1217	Zn4P6N12O	2.9778	5.4594	3.3885	2.04507	3.4591	1.29e+21	5.08928	3.68603	1.62236	2.22878	4.46e+20	5.35048	3.47274	1.91241
mp-1074	NaAg3S2	0.928697	2.32883	1.52837	1.88089	2.41583	5.01e+20	2.29858	1.66855	1.61688	1.53538	1.6e+20	2.32387	1.54834	1.83872
mp-571066	Ba4SiP4	1.0893	3.94804	2.48381	2.00399	2.92941	7.97e+20	3.67917	2.67706	1.61116	2.10204	3.41e+20	3.85832	2.5493	1.86194
mp-23276	Ca6HfO8	4.14799	7.4933	4.73886	1.98838	4.08968	2.22e+21	7.0281	5.11556	1.61034	2.37498	6.65e+20	7.38149	4.83632	1.88558
mp-1427	Ge19(AsI)4	1.01309	3.41324	2.13495	2.02147	2.62114	5.46e+20	3.10308	2.2598	1.6091	2.04403	2.71e+20	3.29493	2.17997	1.85821
mp-558374	Ce(FeP3)4	0.446294	1.33551	0.935452	1.70584	1.93216	3.45e+20	1.38747	1.01344	1.60191	1.1514	8.22e+19	1.32448	0.924512	1.71474
mp-556627	Sc2MnS4	0.612896	1.08776	0.774949	1.66298	1.70894	2.43e+20	1.08709	0.795225	1.59832	1.07581	5.87e+19	1.08722	0.769695	1.6788
mp-3887	Hg3(TeCl)2	1.9068	6.51344	4.05825	2.03333	3.69859	1.6e+21	6.08095	4.4546	1.59494	2.3672	5.89e+20	6.37558	4.18713	1.8789
mp-3335	RbCaH3	3.31339	8.17089	5.00469	2.08611	4.26268	2.57e+21	7.89833	5.8137	1.58352	2.63142	8.49e+20	8.1004	5.24862	1.91731
mp-5302	Dy2Mn2O7	0.9095	4.16089	2.6967	1.9166	3.19261	1.19e+21	4.22255	3.12376	1.57161	1.94701	3.58e+20	4.2003	2.80452	1.83287
mp-14047	CsAu	1.0239	0.28544	0.404225	0.593387	2.52716	5.77e+21	3.45849	2.56324	1.56727	0.421238	1.19e+19	0.249345	0.304465	0.741132
mp-14052	RbVF3	2.458	5.51942	3.61692	1.88509	3.50064	1.59e+21	5.0984	3.78145	1.56554	2.02422	4.37e+20	5.4199	3.65345	1.80689
mp-19996	Y2Mn2O7	0.878696	4.01383	2.61759	1.89883	3.12014	1.12e+21	4.07003	3.02231	1.56275	1.92068	3.38e+20	4.04845	2.71748	1.81838
mp-560373	Lu2MnS4	1.0721	1.30162	0.931587	1.65155	1.80594	2.75e+20	1.27688	0.951585	1.55437	1.15783	7.8e+19	1.30496	0.929835	1.6626
mp-14050	Cs2PtBr6	1.4568	4.74081	3.01075	1.97591	3.096	1.01e+21	4.33469	3.23217	1.55309	2.2383	4.46e+20	4.58843	3.09044	1.80912
mp-6653	Fe2HgO4	1.1479	8.18617	6.22461	1.50818	4.65788	1.3e+22	9.16136	6.84192	1.54943	1.95059	6.88e+20	8.05875	6.32048	1.43971
mp-14001	Gd2Sn2O7	2.6255	5.32843	3.42448	1.94091	3.30148	1.23e+21	4.95997	3.70495	1.54898	2.22246	5.01e+20	5.20911	3.52485	1.79653
mp-2983	K2TeBr6	1.9851	3.36704	2.21365	1.8759	2.57752	5.78e+20	3.05184	2.28037	1.54823	1.87093	2.64e+20	3.25974	2.2355	1.76081
mp-4602	La2Pt2O7	0.970793	4.60928	2.94065	1.96239	3.0508	9.79e+20	4.31069	3.23981	1.53476	2.20112	4.26e+20	4.50257	3.04864	1.79486
mp-17838	In7GeIrO8	0.408198	7.58478	5.65347	1.55397	4.05614	2.23e+21	7.88585	5.92782	1.53437	2.94364	1.08e+21	8.53909	5.84696	1.76491
mp-2345	Rb2MnCl6	1.21521	5.2047	3.41849	1.87863	3.29455	1.3e+21	4.86232	3.66221	1.52986	2.14575	4.61e+20	5.11133	3.49037	1.77212
mp-561442	CsPbCl3	2.3955	0.287015	0.346682	0.753287	1.01311	8.57e+20	0.736365	0.557054	1.51983	0.451308	1.24e+19	0.255903	0.287234	0.840929
mp-5515	Tb2Mn2O7	0.876601	4.1479	2.77616	1.82632	3.07851	1.12e+21	4.21458	3.20001	1.51149	1.90984	3.62e+20	4.18771	2.89193	1.74254
mp-554801	K3SbS4	2.13409	4.11415	2.79337	1.78742	3.02698	1.09e+21	4.02224	3.05494	1.51077	1.84817	3.42e+20	4.09757	2.85609	1.71843
mp-6527	Li3NbS4	1.4086	5.18054	3.46379	1.82909	3.37868	1.57e+21	5.18329	3.99477	1.47799	2.01185	4.72e+20	5.19803	3.60836	1.729
mp-559482	KAg3S2	1.3345	2.79068	1.98882	1.66216	2.49321	6.71e+20	2.75421	2.12663	1.47387	1.55763	2.22e+20	2.79069	2.01917	1.62483
mp-560378	Tl3SbSe3	1.0585	2.1982	1.53785	1.70895	2.10981	3.91e+20	2.1042	1.64426	1.44769	1.50061	1.53e+20	2.17859	1.55489	1.65849
mp-3611	ZnCr2O4	2.6233	6.51307	4.56415	1.70467	3.5127	1.82e+21	5.85317	4.58406	1.44282	2.05404	5.47e+20	6.34654	4.573	1.63494
mp-554082	CaPbF6	3.4728	9.29167	6.24534	1.81471	4.03545	2.61e+21	8.40134	6.63376	1.42523	2.60276	9.75e+20	8.98173	6.3701	1.67425
mp-557890	Cr2CoO4	2.61199	7.20205	5.22625	1.6177	3.85779	2.87e+21	6.78135	5.3752	1.41704	1.9928	6.33e+20	7.12995	5.28253	1.56808
mp-844	Na3(Pt3O4)4	0	0.110864	0.0122526	27.217	6.51399	8.22e+22	23.6581	18.7817	1.41373	0.235418	8.05e+22	24.5135	20.5645	1.30146
mp-646297	Ar	8.5064	19.3122	13.1755	1.77459	6.19987	1.13e+22	17.5283	13.9369	1.41046	2.89591	2.33e+21	18.7765	12.989	1.73803
mp-559835	Rb2S	1.9684	9.63628	6.50648	1.80237	4.14209	2.96e+21	8.7743	6.98427	1.40811	2.65032	1.03e+21	9.35888	6.65389	1.6681
mp-30253	Zn4P6SN12	4.09631	5.7575	3.90876	1.78769	3.2488	1.44e+21	5.38579	4.29112	1.40611	2.14334	5.42e+20	5.63356	4.03318	1.65083
mp-30252	TlClO4	4.5806	9.10164	6.19157	1.78229	3.93654	2.47e+21	8.29781	6.62492	1.40176	2.66895	9.94e+20	8.80107	6.34818	1.63241
mp-4759	RbAu	0.569194	0.255558	0.343826	0.640805	1.61648	9.73e+21	2.7316	2.1824	1.40031	0.428677	1.24e+19	0.237818	0.273323	0.811617
mp-570379	Cs2TlFeF6	2.8977	1.6419	1.23404	1.53471	1.81879	2.9e+20	1.58897	1.27524	1.39087	1.25931	1.14e+20	1.63894	1.23765	1.52387
mp-580589	AgAsF6	1.68049	7.05031	4.82272	1.76756	3.44348	1.69e+21	6.40914	5.15138	1.38776	2.41106	7.43e+20	6.79301	4.94861	1.60831
mp-580541	CuCl	0.443899	5.73688	4.08171	1.66629	3.32918	1.67e+21	5.60929	4.5191	1.38288	2.08885	5.41e+20	5.82769	4.20922	1.62908
mp-545659	CaSnF6	5.377	10.404	7.1667	1.74914	4.19803	3.17e+21	9.4613	7.64839	1.37585	2.66319	1.19e+21	10.0709	7.32854	1.61093
mp-27125	BaGe2S5	2.1848	2.85863	2.02439	1.67801	2.33437	5.93e+20	2.77592	2.25228	1.36829	1.62246	2.17e+20	2.83921	2.07997	1.59482
mp-14921	K4BaU3O12	1.9881	6.02558	4.10978	1.77529	3.15691	1.35e+21	5.46764	4.44314	1.3651	2.24486	5.41e+20	5.82937	4.22136	1.62276
mp-16992	Ag2MoO4	1.8721	6.2091	4.37628	1.68999	3.51593	2.12e+21	6.18031	5.02659	1.36334	2.05454	5.93e+20	6.21836	4.5397	1.60315
mp-15077	KSbO3	1.12831	6.37168	4.51737	1.67514	3.18843	1.46e+21	5.75438	4.74506	1.33547	2.30826	6.48e+20	6.13046	4.60782	1.5346
mp-7331	CaTi4(FeO4)3	1.66649	3.59804	2.82357	1.43847	3.17228	2.05e+21	4.84516	4.00677	1.32975	1.4984	3.41e+20	3.89664	3.04373	1.44852
mp-14039	Rb2TeBr6	2.07919	3.42882	2.49104	1.6149	2.33628	5.79e+20	3.10965	2.57322	1.32847	1.76708	2.85e+20	3.30629	2.52135	1.50163
mp-3688	CdHg6(As2Br3)2	1.3417	3.32271	2.44531	1.58393	2.47334	7.91e+20	3.16255	2.62206	1.32462	1.60744	2.54e+20	3.28233	2.48352	1.5194
mp-3884	Ga2CoO4	1.7921	3.91828	2.86467	1.59967	2.60998	8.57e+20	3.74024	3.10781	1.32028	1.80122	3.59e+20	3.86372	2.9462	1.50181
mp-3334	Kr	7.1816	16.6013	11.7374	1.6821	5.1186	6.33e+21	15.1031	12.6253	1.30839	3.13893	2.15e+21	16.1306	12.0189	1.55481
mp-15170	K2NaScF6	6.75759	9.9569	7.09322	1.66311	3.95775	2.93e+21	9.06841	7.58842	1.30638	2.54496	1.09e+21	9.64573	7.25618	1.53264
mp-15317	Tb(BiO2)3	2.6502	3.82876	2.78838	1.60901	2.48821	7.54e+20	3.61318	3.05037	1.28915	1.84262	3.31e+20	3.75386	2.87678	1.49059
mp-21309	SrMgNiH4	1.8152	5.52755	3.96577	1.64554	2.93718	1.22e+21	5.16212	4.36644	1.28544	2.1248	5.29e+20	5.39104	4.11511	1.49947
mp-3414	TlPd3O4	1.09031	2.66878	2.04729	1.48833	2.27169	7.11e+20	2.7267	2.31998	1.27418	1.4258	1.97e+20	2.68033	2.09231	1.44992
mp-566472	Cr2CdS4	0.417994	4.36716	3.29436	1.52631	2.64166	9.38e+20	4.10148	3.49409	1.27178	1.83757	3.93e+20	4.32529	3.3714	1.45314
mp-7223	Ba2H6Os	1.9668	8.42328	6.23326	1.5709	3.70646	2.65e+21	7.9535	6.78157	1.27011	2.31696	9.31e+20	8.28083	6.40372	1.47049
mp-5513	K2NaYF6	6.2541	10.3098	7.48151	1.61767	3.9565	3.13e+21	9.43835	8.07353	1.264	2.50304	1.07e+21	10.0275	7.65698	1.49867
mp-7886	Bi12PbO20	1.68189	2.59238	1.95634	1.52539	2.17257	5.82e+20	2.61487	2.23723	1.2636	1.49568	2.08e+20	2.60004	2.01912	1.46125
mp-27853	TlPF6	6.3698	5.8963	4.29705	1.60736	3.0296	1.42e+21	5.51261	4.71844	1.26281	2.2099	6.2e+20	5.75859	4.46426	1.46504
mp-566468	Tm2S3	2.2738	2.58886	1.96707	1.50985	2.04164	4.46e+20	2.4407	2.08927	1.26265	1.57823	2.15e+20	2.54337	2.00668	1.42691
mp-23406	LiVF6	3.0732	9.83199	5.21199	2.59094	6.4606	6.44e+22	24.3006	20.8493	1.25831	3.06603	9.21e+20	9.56522	5.28216	2.43683
mp-565905	RbClO4	5.2142	9.10787	6.58032	1.62838	3.69408	2.59e+21	8.26444	7.09555	1.25702	2.56839	1.04e+21	8.79003	6.76736	1.48032
mp-4324	Cs2SnCl6	2.58939	5.94511	4.36227	1.591	2.98119	1.34e+21	5.48298	4.71278	1.2549	2.14552	5.89e+20	5.7639	4.49394	1.45256
mp-565725	MgCr2O4	2.8537	5.45668	4.09028	1.54086	2.88064	1.26e+21	4.95244	4.25895	1.25394	1.97725	4.88e+20	5.29204	4.14433	1.44296
mp-17862	Ba2Re6S11	1.3442	2.13396	1.66869	1.44616	1.85508	3.8e+20	1.87444	1.62356	1.24053	1.40751	1.59e+20	1.99264	1.54735	1.46137
mp-2184	RbPbF3	3.1584	0.401698	0.45572	0.827564	0.846953	2.05e+21	0.922568	0.800303	1.2377	0.540284	1.97e+19	0.384662	0.420483	0.874976
mp-585492	SrLa2O4	3.788	10.4109	7.6137	1.59896	4.0454	3.76e+21	9.88955	8.65124	1.22221	2.44226	1.18e+21	10.2718	7.93118	1.47389
mp-9993	Cs2RbYF6	6.2112	19.2955	14.5743	1.52336	5.21969	7.83e+21	16.98	14.8684	1.22042	3.23708	2.78e+21	18.56	14.6843	1.42097
mp-562609	CsPbF3	3.0475	0.409029	0.468604	0.815497	0.859513	2.02e+21	0.944458	0.829	1.21602	0.543551	2.08e+19	0.392564	0.430824	0.869792
mp-6942	Cs2MgFe(CN)6	4.1748	6.25222	4.68701	1.54066	2.95182	1.4e+21	5.70676	5.0372	1.20587	2.22996	6.67e+20	6.01693	4.83204	1.38953
mp-647164	Cd(FeO2)2	1.8021	8.77949	7.50474	1.26532	3.5025	1.68e+22	8.35868	7.37901	1.20562	2.00944	8.74e+20	8.47532	7.58885	1.18024
mp-570959	Mn(RhO2)2	0.924697	7.35755	5.64652	1.4874	3.44018	2.52e+21	7.34344	6.56231	1.18376	2.07923	7.36e+20	7.3795	5.89723	1.39981
mp-647606	Si(NiO2)2	3.3855	2.24243	1.89251	1.2898	2.02466	6.85e+20	2.3048	2.06219	1.18157	1.22625	1.61e+20	2.2493	1.90987	1.2781
mp-23657	Sm2Mn2O7	0.752694	4.04826	3.15818	1.45127	2.57042	1.09e+21	4.11596	3.70177	1.17244	1.71424	3.77e+20	4.08544	3.31895	1.36571
mp-22598	Zn(FeO2)2	1.6686	7.88791	6.16071	1.44876	3.32811	2.31e+21	7.13272	6.44309	1.16477	2.11927	7.7e+20	7.67866	6.25903	1.35884
mp-28022	Rb2Se	1.79679	9.98251	7.73452	1.46625	3.67526	3.02e+21	9.10229	8.26279	1.15621	2.44106	1.14e+21	9.67181	7.91622	1.35047
mp-218	Li3ScN2	2.2441	2.28472	1.88064	1.33903	1.96056	5.52e+20	2.31716	2.10362	1.15607	1.31322	1.8e+20	2.29238	1.91945	1.30517
mp-8217	MnO2	1.6112	9.29588	7.2374	1.45567	3.4244	2.4e+21	8.17136	7.43782	1.15153	2.38375	9.89e+20	8.87104	7.31006	1.33684
mp-14304	Ti(Bi3O5)4	2.31299	2.89676	2.29314	1.41978	2.1781	7.11e+20	2.98439	2.72146	1.14837	1.474	2.28e+20	2.91626	2.38432	1.35267
mp-14305	Ce2Nd2O7	2.0783	6.00606	4.62628	1.47923	2.85216	1.44e+21	5.53244	5.05328	1.14555	2.08352	6.35e+20	5.82406	4.79207	1.33984
mp-574653	Th(FeP3)4	0.533806	0.378985	0.461132	0.745067	1.05831	7.43e+20	0.916667	0.847325	1.12523	0.48001	1.6e+19	0.322038	0.372386	0.80421
mp-27272	MnO2	1.572	9.16734	7.28788	1.41079	3.32593	2.32e+21	8.09122	7.5116	1.11795	2.34456	1.03e+21	8.72367	7.37764	1.2858
mp-14307	Cs2TeBr6	2.1391	3.47977	2.79785	1.38704	2.113	6.23e+20	3.12438	2.90386	1.11605	1.66726	3.08e+20	3.33974	2.83787	1.27667
mp-28167	Li2NbFe3O8	1.2848	2.58657	2.26198	1.22279	1.93574	5.77e+20	2.50706	2.33126	1.11522	1.29	2.11e+20	2.57666	2.26368	1.2144
mp-571648	K2NaInF6	5.2445	12.6489	9.98517	1.42576	4.10029	4.65e+21	11.7948	11.0123	1.10846	2.49464	1.47e+21	12.4009	10.2973	1.3216
mp-5800	Cr2CdO4	2.4816	6.86695	5.64719	1.3409	3.23949	2.73e+21	6.72168	6.29204	1.10415	1.84612	6.52e+20	6.83298	5.80866	1.27586
mp-14476	ReH8(NCl3)2	1.0201	3.42299	2.79991	1.35173	2.10454	6.42e+20	3.13253	2.94138	1.09904	1.64573	3.18e+20	3.30776	2.85422	1.24758
mp-541097	K2ReCl6	1.0776	3.48485	2.86486	1.34159	2.1106	6.53e+20	3.1931	3.01202	1.09152	1.6528	3.22e+20	3.36915	2.92154	1.2384
mp-3384	Zn4B6SeO12	1.8609	6.92717	5.54269	1.39718	2.96129	1.8e+21	6.35211	5.99957	1.08942	2.07548	7.34e+20	6.71491	5.70959	1.27542
mp-23372	Cd4P6SN12	2.9917	6.71092	5.41543	1.37951	2.92591	1.77e+21	6.12873	5.79792	1.08679	2.04477	6.77e+20	6.5158	5.55017	1.27201
mp-8624	Rb2NaErF6	6.49841	10.6198	8.53711	1.38743	3.59424	3.16e+21	9.75198	9.25281	1.082	2.40682	1.27e+21	10.2853	8.79409	1.26484
mp-6276	Sc2O3	3.8235	5.30885	4.29793	1.37282	2.53487	1.12e+21	4.8005	4.55608	1.08154	1.97313	5.39e+20	5.09474	4.40416	1.24419
mp-14620	Rb2NaHoF6	6.4808	10.7796	8.5949	1.40456	3.65366	3.4e+21	9.85754	9.36116	1.08058	2.43258	1.26e+21	10.4523	8.84636	1.28431
mp-555606	Rb2NaYF6	6.4704	10.5221	8.3886	1.40482	3.61802	3.32e+21	9.62204	9.13843	1.08042	2.39582	1.23e+21	10.2006	8.63493	1.28396
mp-17499	K2Te	2.1383	17.631	14.7759	1.30342	4.54095	6.78e+21	14.92	14.2112	1.07574	2.73599	2.36e+21	16.7799	14.6268	1.22874
mp-8921	Cr2CdSe4	0.333095	3.50112	3.29493	1.09532	2.20085	7.43e+20	3.6813	3.51534	1.07165	1.6401	4.27e+20	3.85008	3.4356	1.18632
mp-504520	In(HO)3	2.7719	6.08862	5.03214	1.33091	2.68449	1.4e+21	5.49965	5.25579	1.0704	2.00426	6.6e+20	5.72338	4.94035	1.24693
mp-7483	Cs2TiCl6	2.2311	6.14435	4.98159	1.36981	2.70727	1.39e+21	5.63558	5.39611	1.0673	2.04379	6.57e+20	5.92507	5.15277	1.23304
mp-18577	Ba2MgUO6	2.05889	10.018	8.08648	1.37891	3.35368	2.7e+21	9.06384	8.79877	1.04553	2.62655	1.37e+21	9.56441	8.42679	1.20919
mp-561561	Li3FeO4	0.336401	1.23294	4.03024	0.169207	3.17478	2.8e+21	7.04838	6.85251	1.04318	1.64495	1.09e+21	6.74035	6.08667	1.16534
mp-568516	Ca2Ta2O7	2.2955	4.67788	3.94124	1.29307	2.44584	1.19e+21	4.49963	4.41293	1.02961	1.76117	4.89e+20	4.62463	4.10908	1.19399
mp-569149	GeF4	5.5005	12.1488	10.2829	1.28418	3.82737	4.36e+21	11.4021	11.1834	1.02948	2.42014	1.65e+21	11.898	10.6019	1.18888
mp-34337	LiCrO2	3.0611	6.36879	5.40888	1.27769	2.74606	1.66e+21	5.77745	5.68185	1.02534	1.85624	6e+20	6.17783	5.48944	1.19389
mp-11824	Rb2SeCl6	2.6093	4.45992	3.8181	1.26247	2.22719	8.86e+20	4	3.97683	1.00875	1.69982	4.02e+20	4.28453	3.87547	1.16243
mp-11018	Yb19(Mg4H27)2	2.7756	2.85377	2.48068	1.23388	1.87663	5.5e+20	2.76277	2.74939	1.00731	1.46608	2.61e+20	2.8274	2.57811	1.1485
mp-559200	LiGa5O8	2.5223	10.7341	9.14488	1.27168	3.50972	3.69e+21	10.0232	10.1034	0.988126	2.23519	1.28e+21	10.5028	9.47408	1.16722
mp-644203	Ba4TiP4	1.0679	2.75497	2.42074	1.2141	1.72329	4.22e+20	2.56558	2.5993	0.980605	1.56744	2.69e+20	2.65803	2.51191	1.08851
mp-16031	Zr3Pb(O2F3)2	2.8525	0.914508	0.953652	0.939067	1.55991	6.69e+21	3.01687	3.07451	0.972008	0.755134	5.95e+19	0.900446	0.94377	0.931938
mp-667342	Ba2H6Ru	1.8774	9.98746	8.64487	1.24178	3.3053	3.14e+21	9.24175	9.42774	0.970554	2.3269	1.27e+21	9.71219	8.93298	1.13366
mp-18337	Ge(Bi3O5)4	2.3755	2.84375	2.51121	1.20507	1.91246	6.74e+20	2.89402	2.95688	0.968279	1.3808	2.56e+20	2.85855	2.63295	1.13124
mp-571341	Ca2Nb2O7	1.44209	4.57352	4.05064	1.19975	2.28911	1.14e+21	4.40069	4.55336	0.950131	1.69458	4.66e+20	4.52242	4.22644	1.10686
mp-13801	Zn4B6O13	3.4078	7.28127	6.38976	1.21642	2.72708	1.82e+21	6.66075	6.91342	0.945682	2.04699	8.68e+20	7.0074	6.61796	1.08956
mp-13799	TbCs2KCl6	5.08779	5.94284	5.24359	1.20656	2.44729	1.32e+21	5.44648	5.67641	0.939859	1.88663	6.28e+20	5.72773	5.42138	1.08595
mp-13816	Sr4GeP4	1.0529	1.99983	1.84551	1.12801	1.51247	3.33e+20	1.96073	2.04369	0.939733	1.23347	1.62e+20	1.98913	1.89719	1.07357
mp-11661	RbSi	1.35	2.4982	2.31623	1.12013	1.57528	3.58e+20	2.26653	2.37177	0.934187	1.39276	2.18e+20	2.39391	2.34125	1.03393
mp-13811	NaInH8(NF3)2	5.0085	11.1286	9.84124	1.2025	3.40667	3.79e+21	10.4199	10.9677	0.926023	2.22793	1.41e+21	10.8779	10.2376	1.09528
mp-653337	Hg2Pt2O7	0	0.00912169	0.0230668	0.248675	2.02422	5.13e+22	7.84525	8.27396	0.923294	0.0469335	5.13e+22	7.84525	8.27396	0.923294
mp-13926	RbGe	1.015	2.50363	2.35622	1.0953	1.56108	3.66e+20	2.27544	2.41519	0.914472	1.36952	2.18e+20	2.40445	2.38232	1.01397
mp-13925	In4GeS4	1.0698	1.96321	1.8656	1.0795	1.39549	2.63e+20	1.84946	1.97166	0.908491	1.2433	1.58e+20	1.92239	1.90101	1.01692
mp-13898	Rb2H6Pt	4.08661	11.5585	10.6551	1.12984	3.27717	3.47e+21	10.1847	10.8966	0.903618	2.39338	1.57e+21	10.9858	10.7656	1.03085
mp-504884	In2O3	0.933106	8.78089	7.92943	1.16532	2.89206	2.42e+21	7.97022	8.56582	0.897535	2.18323	1.16e+21	8.41404	8.20534	1.03839
mp-4842	Cs2GeCl6	2.2139	6.24286	5.65377	1.1603	2.42402	1.42e+21	5.71294	6.15796	0.893581	1.97847	7.3e+20	5.99269	5.88504	1.02757
mp-20493	K2Se	2.091	20.1127	19.2671	1.06655	4.22197	7.8e+21	16.8077	18.1454	0.891481	2.68247	2.95e+21	18.9685	18.8772	1.00726
mp-23370	Ni2Hg2OF6	0.955596	4.71665	4.46381	1.08616	2.37615	1.63e+21	4.86492	5.26041	0.889373	1.48857	4.7e+20	4.75466	4.65371	1.03271
mp-16180	Rb2Te	1.88431	12.0045	11.3372	1.08957	3.33995	3.89e+21	10.7422	11.6619	0.884071	2.24853	1.65e+21	11.5067	11.4747	1.00419
mp-16293	Co(RhO2)2	0.814205	7.98329	7.31465	1.1402	2.90631	2.63e+21	8.00033	8.70077	0.881708	1.95906	9.51e+20	8.01722	7.79332	1.0434
mp-15803	La2Ce2O7	2.19269	6.95017	6.84719	1.02264	3.66438	1.02e+23	18.9544	20.7942	0.870269	1.7991	8.13e+20	6.72148	7.1694	0.907764
mp-2074	Ba4TiAs4	1.03601	2.68493	2.55062	1.08002	1.56156	3.95e+20	2.50023	2.7436	0.86994	1.48449	2.7e+20	2.58019	2.65955	0.955578
mp-13803	LiMnF3	3.29571	4.80327	4.61013	1.06349	2.05807	9.3e+20	4.25905	4.68398	0.867055	1.6697	5e+20	4.5452	4.64352	0.968409
mp-639787	Cs2TlBiF6	3.07729	0.462434	0.518926	0.841232	0.738045	6.99e+19	0.460279	0.508053	0.862318	0.580406	2.5e+19	0.453352	0.490507	0.888558
mp-19552	K4CaU3O12	2.1062	6.85255	6.0489	1.20577	2.90154	1.69e+22	8.76052	9.68847	0.859829	1.83125	6.98e+20	6.67878	6.28868	1.09447
mp-579015	Mg4P6SN12	4.8355	8.15753	7.70377	1.08964	2.69178	2.12e+21	7.39771	8.1897	0.858507	1.9723	9.41e+20	7.84832	7.90577	0.98912
mp-579533	SiP2O7	5.456	5.96378	5.63387	1.08911	2.32549	1.38e+21	5.50835	6.11028	0.855935	1.79984	6.61e+20	5.76861	5.83442	0.983131
mp-646116	Ba3Lu2Zn5O11	2.29021	4.19581	3.96612	1.08811	1.92175	7.83e+20	3.80855	4.23792	0.851943	1.65055	4.42e+20	4.00504	4.09689	0.966557
mp-566529	K2S	2.323	17.377	16.9024	1.04241	3.87092	6.65e+21	15.236	17.0394	0.845526	2.52764	2.61e+21	16.5942	16.9647	0.967419
mp-556143	Cs2NaYF6	6.8654	13.3477	12.5217	1.10057	3.47907	4.84e+21	12.2926	13.7486	0.845425	2.34636	1.8e+21	12.9677	12.948	1.00229
mp-565213	LuAl3(PbO4)2	2.98469	4.59838	4.4498	1.0505	2.01674	9.36e+20	4.16849	4.66572	0.844483	1.62104	4.84e+20	4.40617	4.54605	0.954204
mp-566555	Sb2O3	3.3462	7.11055	6.67699	1.09897	2.45695	1.67e+21	6.40191	7.19059	0.840073	1.98635	8.6e+20	6.76945	6.91582	0.96842
mp-568863	SnI4	1.5624	6.0158	5.69551	1.08553	2.34294	1.5e+21	5.66317	6.37262	0.837748	1.78158	6.52e+20	5.879	5.95634	0.980587
mp-3949	In4SnSe4	0.8023	1.68679	1.72211	0.969391	1.22323	2.08e+20	1.60594	1.8106	0.835338	1.14512	1.36e+20	1.65985	1.75037	0.923439
mp-14778	Tl2TeCl6	2.5769	4.35534	3.48861	1.39494	3.10538	9.52e+21	8.82087	9.98761	0.829994	1.8117	4.18e+20	4.15128	3.52348	1.27884
mp-23420	InCl	2.1877	2.76526	2.78313	0.990381	1.59947	5.11e+20	2.61376	2.97321	0.824251	1.28713	2.54e+20	2.70811	2.8485	0.926988
mp-14214	InHg6As4Cl7	1.3829	2.35838	2.38155	0.985439	1.45739	3.83e+20	2.23436	2.55453	0.818021	1.25388	2.15e+20	2.31007	2.45152	0.914709
mp-12231	Na2MoO4	4.39409	10.1145	9.74551	1.05732	3.07048	3.67e+21	9.82663	11.2629	0.814954	2.03458	1.36e+21	10.0336	10.2804	0.964214
mp-15103	VF3	1.5498	4.38259	4.66769	0.909796	2.09168	1.51e+21	4.11427	4.7431	0.807878	1.33956	4.4e+20	4.2802	4.61738	0.892488
mp-23648	K9U6BiO24	1.71741	2.25121	3.06425	0.629705	3.96359	1.49e+22	14.6236	16.967	0.800151	0.958298	2.27e+20	2.19369	3.12761	0.587414
mp-14565	Cs2NaErF6	6.864	13.6179	13.288	1.03746	3.36601	4.84e+21	12.5254	14.5379	0.799713	2.30362	1.96e+21	13.1893	13.7634	0.938086
mp-14607	Lu2O3	4.0233	5.45388	5.3642	1.02518	2.07642	1.1e+21	4.95354	5.74948	0.799705	1.71264	6.17e+20	5.19585	5.55495	0.904618
mp-23651	Y5Tm11O24	4.04769	5.40844	5.43808	0.991835	2.01069	1.1e+21	4.88983	5.69801	0.79498	1.65192	5.66e+20	5.1524	5.48122	0.911377
mp-28590	HoAl3(PbO4)2	2.9941	4.60579	4.64353	0.987836	1.93454	9.34e+20	4.17511	4.87072	0.793619	1.56766	4.87e+20	4.411	4.74615	0.895969
mp-14678	Cr2HgO4	1.25781	8.05449	7.95285	1.01923	2.552	2.19e+21	7.26054	8.50116	0.789289	1.8604	8.99e+20	7.75186	8.15555	0.926678
mp-568923	NO2	2.78411	4.77113	4.76675	1.00138	1.89796	8.67e+20	4.18905	4.90694	0.788783	1.6609	4.93e+20	4.47442	4.82679	0.892519
mp-23266	Si(Bi3O5)4	2.3514	2.93614	2.95985	0.988008	1.64875	6.22e+20	2.92374	3.42928	0.787233	1.2999	2.73e+20	2.93407	3.11554	0.913915
mp-17455	Sn2Bi2O7	2.712	7.0548	6.95196	1.02227	2.32012	1.6e+21	6.23772	7.31995	0.786642	1.9881	9.04e+20	6.62619	7.14207	0.893634
mp-14753	Gd2V2O7	0.983596	5.26323	5.2899	0.992447	2.07823	1.23e+21	4.83433	5.7084	0.77935	1.603	5.53e+20	5.09103	5.4545	0.90173
mp-554435	Zn(NO3)2	3.40491	7.05996	7.17814	0.975406	2.37756	1.82e+21	6.48729	7.68804	0.775125	1.82271	8.87e+20	6.81397	7.41131	0.881574
mp-540866	Ge19(PI)4	1.0766	3.3066	3.35994	0.976282	1.59629	5.35e+20	3.03174	3.59449	0.774608	1.37115	3.02e+20	3.17883	3.46442	0.878935
mp-14760	K2TeCl6	2.5686	3.88023	2.70373	1.71926	3.00719	9.48e+21	9.03756	10.732	0.772777	1.92225	3.16e+20	3.74078	2.73175	1.60244
mp-28730	SnHg6(As2Br3)2	1.36379	3.73453	3.81193	0.969699	1.71233	6.78e+20	3.43289	4.08076	0.771576	1.43548	3.68e+20	3.59522	3.93049	0.874819
mp-570285	K2Sn2O3	1.4051	0.312304	0.391201	0.71329	0.540595	3.76e+19	0.288169	0.344183	0.766105	0.453649	1.36e+19	0.276685	0.321669	0.797744
mp-14246	NO2	2.8134	5.16843	5.29422	0.964571	2.02883	1.17e+21	4.83724	5.79533	0.762569	1.64502	6.08e+20	5.01962	5.52681	0.865555
mp-14215	La17Al4(Si3N11)3	1.8771	2.61055	2.75387	0.922959	1.53675	5.34e+20	2.66539	3.19553	0.761775	1.24024	2.76e+20	2.66056	2.94607	0.858211
mp-14213	NaGaH8(NF3)2	5.8536	11.0465	11.1304	0.988713	2.87405	3.25e+21	10.0898	12.1185	0.759709	2.24	1.67e+21	10.5764	11.6069	0.869825
mp-560174	Mg3N2	1.50991	7.58685	6.19259	1.35608	3.91672	8.51e+22	21.4194	25.7685	0.75784	2.01179	7.76e+20	7.41589	6.37028	1.25605
mp-18529	Tm2V2O7	1.1198	5.85733	5.19451	1.19738	3.10103	1.78e+22	10.8735	13.1747	0.74979	1.8251	6.34e+20	5.65671	5.33237	1.09261
mp-23476	H3N	3.7337	2.78569	3.17266	0.822745	1.62912	8.27e+20	2.77782	3.36792	0.749055	1.0894	2.59e+20	2.78634	3.2154	0.806675
mp-28146	Lu2V2O7	1.153	5.87562	5.04208	1.25796	2.82707	1.82e+22	9.70043	11.7725	0.747964	1.87518	6.06e+20	5.67812	5.16263	1.15345
mp-28161	Tm2O3	3.9804	5.51875	5.66449	0.961657	2.00037	1.13e+21	5.03209	6.11862	0.745836	1.65671	6.33e+20	5.2668	5.88972	0.845628
mp-13614	Mg(RhO2)2	1.15629	10.1411	10.2184	0.988673	2.85996	3.49e+21	9.86493	12.0346	0.742155	1.98931	1.37e+21	10.0448	10.9037	0.884195
mp-569225	K2Pb2O3	1.7706	0.416177	0.534832	0.686422	0.610991	5.81e+19	0.399826	0.497217	0.721088	0.508249	2.01e+19	0.385465	0.459152	0.769208
mp-6115	Na3SbTe3	1.4701	5.52893	5.80843	0.928697	1.95721	1.15e+21	5.04074	6.28532	0.718208	1.68452	6.61e+20	5.27051	6.05893	0.811307
mp-14387	YTmO3	4.0595	5.44818	5.79064	0.912616	1.90257	1.11e+21	4.92733	6.14733	0.717608	1.59205	6.24e+20	5.16351	5.92299	0.813966
mp-583553	Er2O3	3.964	5.60638	5.8881	0.929096	1.97272	1.19e+21	5.11866	6.3954	0.716032	1.62992	6.1e+20	5.37647	6.11563	0.824299
mp-12236	Dy2V2O7	1.0648	5.61468	5.24945	1.10616	3.1586	1.73e+22	11.6016	14.5107	0.714899	1.72919	6.13e+20	5.43339	5.4157	1.00491
mp-23341	SmAl3(PbO4)2	2.99069	4.59253	4.97796	0.886135	1.79508	9.3e+20	4.17214	5.23971	0.710522	1.47616	4.96e+20	4.39656	5.1012	0.800131
mp-14407	K2NaTlF6	3.64439	16.0821	18.1749	0.832348	3.2689	5.88e+21	13.3111	16.7224	0.710188	2.09261	2.14e+21	15.1824	17.7373	0.791911
mp-5207	SiO2	5.64999	9.36559	10.0668	0.897364	2.5667	2.78e+21	8.36525	10.5132	0.709765	1.91129	1.28e+21	8.94082	10.2691	0.812397
mp-29043	In4GeSe4	0.620297	1.65928	1.89868	0.816965	1.07993	1.99e+20	1.57941	1.99309	0.705423	1.07189	1.45e+20	1.6234	1.94015	0.765393
mp-556287	Rb2NaBiF6	4.93889	6.59116	7.14046	0.886859	2.07144	1.43e+21	5.78697	7.32755	0.70184	1.7466	8.24e+20	6.16274	7.23766	0.785711
mp-14889	Dy2O3	3.92511	5.90052	6.32964	0.900052	1.99222	1.27e+21	5.45005	6.91913	0.699074	1.615	6.51e+20	5.68571	6.59722	0.800085
mp-649470	Sr5(IrO3)6	0	0.290616	0.189313	1.902	1.55497	3.33e+21	3.19361	4.06696	0.695855	0.25083	3.08e+21	3.08134	3.88355	0.70675
mp-649608	Cs2RbBiF6	4.7856	3.6363	3.97148	0.876113	1.55917	6.11e+20	3.39006	4.31813	0.695613	1.47692	4.37e+20	3.47816	4.19822	0.754097
mp-15239	Na2WO4	4.7521	8.9001	9.55212	0.899379	2.50823	2.64e+21	8.48961	10.8377	0.69331	1.87093	1.24e+21	8.72761	10.1184	0.801079
mp-667380	Hg3(SF)2	1.8388	6.17846	6.63624	0.898334	2.023	1.36e+21	5.66917	7.24382	0.692353	1.63988	6.98e+20	5.93533	6.91405	0.795368
mp-667320	CoO2	0.195405	0.396665	3.05868	0.0467019	2.17008	1.96e+21	5.77629	7.38317	0.692004	1.18898	1.18e+21	5.73637	7.04442	0.73483
mp-653631	Al2CoO4	3.00161	5.85537	6.40363	0.874365	2.04926	1.55e+21	5.51841	7.10755	0.684134	1.55828	6.95e+20	5.72339	6.68888	0.791499
mp-643101	K2RbGdV2O8	3.38691	7.2017	8.15554	0.829799	2.07706	1.54e+21	6.32704	8.16736	0.681833	1.60571	8.54e+20	6.59595	7.82914	0.773295
mp-643279	Sm2V2O7	0.960099	5.41097	5.96675	0.863587	3.42773	1.65e+22	13.817	17.9012	0.678104	1.49756	5.86e+20	5.23385	6.15996	0.783185
mp-16272	Ba3Zn5In2O11	1.6195	5.4973	6.07076	0.861708	1.90543	1.22e+21	5.0336	6.52958	0.676848	1.48404	5.92e+20	5.29058	6.2689	0.775296
mp-33018	P3Ir	0.0943963	0.190093	0.252849	0.651867	0.33423	5.21e+19	0.169604	0.220018	0.676813	0.154428	3.28e+19	0.148026	0.19651	0.653783
mp-505242	CO2	6.6332	10.5657	11.5087	0.879645	2.74423	3.78e+21	10.1073	13.1144	0.676595	1.9505	1.52e+21	10.3961	12.1146	0.794957
mp-669364	Y11Tm5O24	4.06031	5.4955	6.10778	0.853465	1.83025	1.11e+21	4.94903	6.4242	0.676163	1.54316	6.19e+20	5.18205	6.18602	0.766718
mp-27554	EuCrO3	0	0.0809766	0.0304466	4.33742	1.51839	1.82e+23	10.969	14.2536	0.675091	0.0173254	1.82e+23	10.9853	14.3338	0.670926
mp-29044	Li2Ti3ZnO8	3.127	4.6357	5.03251	0.884089	1.72636	8.92e+20	4.28856	5.58036	0.673711	1.54319	5.34e+20	4.44536	5.32419	0.762921
mp-28708	Rb2TeCl6	2.65861	3.95325	3.10244	1.43839	3.02721	8.8e+21	10.7284	13.9645	0.673383	1.80023	3.69e+20	3.7765	3.14516	1.31574
mp-3041	LiRhO2	1.38701	13.6548	14.7697	0.888944	3.11313	5.64e+21	12.9834	16.9017	0.673265	2.07596	1.92e+21	13.4595	15.5058	0.808725
mp-4284	Cs2SeCl6	2.7708	4.53683	5.09082	0.841294	1.69346	8.59e+20	4.08801	5.33331	0.671078	1.42439	4.92e+20	4.30606	5.21109	0.751152
mp-14712	Li3NbO4	3.77561	10.8783	11.9787	0.865419	2.72553	3.69e+21	10.2629	13.3905	0.670982	1.92294	1.5e+21	10.6503	12.5438	0.782345
mp-8888	Cd4B6O13	2.43341	8.9627	9.8561	0.867164	2.38878	2.46e+21	7.99936	10.4459	0.670137	1.84658	1.19e+21	8.52244	10.1157	0.773309
mp-14827	TiV2O7	2.0316	6.01799	6.67223	0.856587	1.93752	1.31e+21	5.35712	7.01673	0.667105	1.66641	7.45e+20	5.67321	6.84779	0.75408
mp-28914	Y2V2O7	1.0652	5.87841	6.1254	0.94013	2.9061	1.72e+22	11.0332	14.4906	0.66439	1.61657	6.51e+20	5.69034	6.3219	0.853957
mp-555611	CuH3NCl	2.1352	1.47068	1.81384	0.730092	1.0865	2.99e+20	1.466	1.92548	0.664348	0.840998	1.22e+20	1.47055	1.82633	0.722525
mp-14890	Ho2O3	3.9498	5.66139	6.24142	0.863891	1.89164	1.23e+21	5.19247	6.83384	0.662313	1.56778	6.31e+20	5.43875	6.5089	0.763812
mp-646878	Tb2O3	3.9006	6.08909	6.71394	0.863699	1.97613	1.43e+21	5.62493	7.42684	0.659127	1.5899	6.77e+20	5.88406	7.01143	0.768785
mp-28585	Y7HoO12	4.0498	5.58219	6.24867	0.844354	1.82396	1.13e+21	5.03914	6.67296	0.656232	1.53632	6.3e+20	5.2643	6.40973	0.744306
mp-1767	NdAl3(PbO4)2	2.9857	4.61219	5.26309	0.820351	1.70394	9.35e+20	4.18602	5.54849	0.655301	1.42699	5.11e+20	4.40761	5.40237	0.736933
mp-18293	Ag(BCl)6	2.69551	2.20262	2.56117	0.797542	1.1748	2.96e+20	2.0722	2.74732	0.655063	1.14731	2.09e+20	2.13054	2.66198	0.716026
mp-554203	K2ReBr6	0.982494	3.12762	2.27136	1.61581	3.42131	1.1e+22	14.4607	19.2062	0.653314	1.72902	2.6e+20	3.03437	2.29762	1.5177
mp-3142	Al2O3	5.2158	12.2014	13.8305	0.82863	2.84227	4.6e+21	11.3622	15.1469	0.649691	1.87845	1.63e+21	11.9053	14.2989	0.759725
mp-361	Y7TmO12	4.0624	5.55845	6.25506	0.837691	1.82449	1.15e+21	5.02353	6.71755	0.646691	1.53891	6.46e+20	5.25113	6.44552	0.735348
mp-555524	NaSbF6	4.8651	10.9204	12.1048	0.856886	2.5578	3.19e+21	9.84784	13.1869	0.64535	2.18581	1.78e+21	10.3474	12.6712	0.737944
mp-669331	Y13Ho3O24	4.0053	5.62424	6.38434	0.826841	1.81531	1.18e+21	5.10141	6.85873	0.641461	1.53008	6.58e+20	5.33151	6.57728	0.729805
mp-644246	In4SnS4	1.1714	2.23324	2.6334	0.78096	1.17822	3.17e+20	2.11208	2.84368	0.640097	1.09261	2e+20	2.17623	2.72638	0.713143
mp-19710	Li7VN4	2.84	3.88135	4.44782	0.815179	1.57229	7.71e+20	3.70097	4.99117	0.638513	1.35879	4.35e+20	3.79435	4.71491	0.721931
mp-567334	Y15TmO24	4.05709	5.55949	6.41308	0.807146	1.76499	1.16e+21	5.04215	6.80952	0.637162	1.50128	6.46e+20	5.27362	6.54654	0.723013
mp-541672	Ca12Be17O29	3.6699	1.13327	1.45663	0.686243	0.912999	1.84e+20	1.11677	1.51068	0.635603	0.767175	9.17e+19	1.13469	1.45194	0.690859
mp-3538	EuVO3	0	0.153354	0.026494	13.9258	4.85155	1.03e+23	33.8948	45.9459	0.633622	0.317683	1.02e+23	34.3113	47.038	0.622993
mp-23870	Rb19O3	0	0.0511518	0.0656052	0.688468	0.324003	1.14e+21	0.452935	0.617128	0.628769	0.0242826	1.12e+21	0.448981	0.609803	0.631769
mp-23804	Y2O3	4.05601	5.51685	6.27396	0.824565	1.8027	1.19e+21	5.02156	6.84836	0.627882	1.52897	6.13e+20	5.28251	6.53119	0.727398
mp-632319	K2HfF6	6.89741	11.6526	13.1808	0.831228	2.61866	3.71e+21	10.6294	14.5527	0.624238	2.0145	1.75e+21	11.183	13.7793	0.731132
mp-24423	N2	7.3314	13.247	15.2549	0.809213	2.70615	4.02e+21	11.6387	15.9428	0.623753	2.20558	2.09e+21	12.4453	15.584	0.713651
mp-29799	In7Br9	1.5438	2.68485	3.25971	0.747501	1.41882	7.33e+20	2.76821	3.80332	0.620946	1.05613	2.64e+20	2.7108	3.41674	0.706687
mp-24292	K2NiF6	2.366	10.8187	12.446	0.810432	2.44018	2.91e+21	9.82509	13.5018	0.620753	2.13558	1.75e+21	10.2418	13.0467	0.695524
mp-16705	AgClO3	2.9272	7.4653	8.71265	0.793133	1.99753	1.64e+21	6.61074	9.15232	0.613873	1.77045	1e+21	6.97265	8.95964	0.686533
mp-1056	Cs2NaBiF6	5.0369	6.34151	7.54573	0.770437	1.84358	1.31e+21	5.59577	7.75925	0.612435	1.61619	8.12e+20	5.90922	7.66671	0.676677
mp-17538	K(BH)3	5.0297	8.77542	9.03616	0.957031	5.50034	3.6e+22	48.1677	66.9154	0.610723	3.39169	3.47e+22	103.613	181.294	0.432065
mp-22168	Cs2NaTlF6	3.5932	15.9662	19.9493	0.716001	2.91221	5.51e+21	13.184	18.3349	0.609754	1.99124	2.32e+21	14.8951	19.3254	0.676665
mp-28040	Sm2O3	3.7823	7.04253	8.19592	0.79652	2.03595	1.87e+21	6.57951	9.17376	0.607393	1.5955	8.87e+20	6.83418	8.62548	0.705269
mp-24227	Tl(BH)6	4.54099	1.30619	1.70213	0.672237	0.965459	2.45e+20	1.33482	1.87093	0.602628	0.779222	1.09e+20	1.3082	1.71305	0.667351
mp-23950	Ni(Pt3O4)4	0	0.268415	0.0308668	25.6432	2.56526	4.93e+22	13.5393	19.0621	0.598602	0.15248	4.77e+22	13.8466	20.5833	0.551751
mp-23763	CsClO4	5.3068	9.72282	11.3488	0.792984	2.28849	2.66e+21	8.79074	12.3931	0.597406	2.02051	1.61e+21	9.17964	11.9454	0.673655
mp-696965	V2CrO7	0.621494	5.87523	7.1863	0.739229	1.81174	1.36e+21	5.43451	7.68845	0.594267	1.50593	7.13e+20	5.72313	7.44053	0.674597
mp-24052	Pm2O3	3.7666	7.508	8.88911	0.776245	2.06934	2.06e+21	7.00857	9.927	0.593222	1.61299	9.8e+20	7.28343	9.35195	0.687307
mp-23818	Fe2GeO4	1.408	8.75611	32.6027	0.139183	3.02221	2.44e+22	14.0073	19.9503	0.588308	0.675226	1.57e+21	8.12721	34.5268	0.114203
mp-643243	NaSr3NbO6	3.3005	6.92832	8.17219	0.78061	2.00871	2e+21	6.46734	9.22431	0.587066	1.52479	8.69e+20	6.60457	8.42144	0.694524
mp-643002	Cs2NaInF6	5.3058	15.5234	18.9621	0.740713	2.90398	5.99e+21	14.0638	20.2054	0.580701	2.00111	2.29e+21	14.9876	19.4318	0.677378
mp-36248	LiAl5O8	5.25099	11.7331	15.5342	0.656424	2.60633	5.04e+21	10.8887	15.8895	0.567286	1.66817	1.7e+21	11.525	15.7716	0.624664
mp-24440	Nd2O3	3.708	8.1633	10.0599	0.730986	2.07019	2.22e+21	7.60731	11.1158	0.566156	1.61935	1.06e+21	7.91435	10.5328	0.651338
mp-28686	Si3(BiO3)4	3.8981	2.83461	3.65397	0.683268	1.25442	5.62e+20	2.79292	4.184	0.545381	1.08347	2.91e+20	2.82186	3.87313	0.621886
mp-24507	Pr2O3	3.65931	8.79166	11.0836	0.70646	2.08165	2.52e+21	8.06974	12.175	0.539616	1.65654	1.21e+21	8.46537	11.5731	0.625598
mp-23882	Na6CdCl8	4.02139	5.80436	7.36013	0.700331	1.72407	1.51e+21	5.45681	8.29249	0.533802	1.34384	6.72e+20	5.65292	7.73209	0.625121
mp-24523	GdAl3(PbO4)2	2.982	3.91636	5.16795	0.659698	1.39886	7.97e+20	3.68985	5.6261	0.531132	1.22165	4.56e+20	3.8101	5.40478	0.591885
mp-24447	Li3Cr2(PO4)3	3.12789	2.46262	3.31325	0.64079	1.09066	3.79e+20	2.30098	3.52841	0.526626	1.03527	2.54e+20	2.37554	3.42742	0.577024
mp-567030	Er3Ga5O12	3.3298	7.29559	9.31171	0.693499	1.81147	1.68e+21	6.65596	10.2188	0.525676	1.67118	1.08e+21	6.90311	9.86527	0.585333
mp-24126	Ge19(PBr)4	1.4182	4.31465	5.61214	0.674103	1.46001	9.34e+20	4.06536	6.25011	0.524587	1.21533	4.7e+20	4.20147	5.89713	0.60137
mp-23961	Li2Mn3SbO8	0.739306	5.52584	7.29753	0.658922	1.58988	1.2e+21	4.89154	7.53192	0.523371	1.35203	6.43e+20	5.2162	7.40684	0.590993
mp-707209	Sr4Al6WO16	3.5419	1.99817	2.80169	0.602309	1.06002	4.2e+20	1.98966	3.0784	0.519613	0.858322	1.87e+20	1.99796	2.87626	0.578948
mp-530399	KRb2FeF6	4.0999	5.04921	6.55471	0.676089	1.48982	9.74e+20	4.52465	7.0182	0.517654	1.45617	7e+20	4.69301	6.86525	0.565187
mp-568847	YBiO3	2.4936	5.04061	4.07959	1.37341	4.34699	2.82e+22	35.1886	54.6385	0.516837	1.55296	3.7e+20	4.42496	3.13898	1.67371
mp-37153	KRb2BiF6	4.7982	4.38406	5.75536	0.664824	1.39051	7.91e+20	4.02128	6.25695	0.515231	1.37166	5.65e+20	4.14495	6.08889	0.561659
mp-554219	AgPF6	3.229	9.15288	11.9943	0.666616	1.98018	2.29e+21	8.32831	13.0133	0.51198	1.72727	1.39e+21	8.6725	12.5747	0.572754
mp-1888	Ti3Zn2O8	2.587	5.28027	6.91594	0.667125	1.57183	1.19e+21	5.03835	7.88926	0.510361	1.34594	6.6e+20	5.1589	7.40937	0.580983
mp-677014	ZrVF6	2.4098	10.476	14.0085	0.646699	2.09278	2.77e+21	9.17993	14.3913	0.509458	1.85579	1.72e+21	9.70811	14.2295	0.563532
mp-677733	Li7PN4	3.4744	4.37286	5.84267	0.647488	1.40341	8.86e+20	4.14324	6.58194	0.499435	1.27404	5.41e+20	4.24826	6.2523	0.560088
mp-21618	Li3SbO3	2.9032	6.75613	9.86714	0.566579	3.78495	2.01e+22	27.4045	43.6665	0.497175	1.62159	1.93e+22	37.3004	67.4126	0.411585
mp-568397	Cr2Fe3(SiO4)3	3.1403	2.38415	3.30579	0.612476	1.05945	3.99e+20	2.3033	3.67368	0.496447	0.986498	2.43e+20	2.34782	3.47711	0.554843
mp-21567	Co3B7IO13	2.2409	5.61401	7.53488	0.643125	1.51515	1.09e+21	5.13121	8.18798	0.496094	1.40546	7.12e+20	5.31718	7.93044	0.549005
mp-2146	SnP2O7	3.3218	5.7515	7.75432	0.638787	1.57548	1.26e+21	5.35122	8.55423	0.494775	1.38201	7.68e+20	5.52656	8.20504	0.552791
mp-5214	In3(PO4)2	3.06929	4.68769	7.7884	0.466946	1.91582	5.99e+21	6.67838	10.7048	0.492767	0.954607	5.59e+20	4.81931	8.43801	0.431635
mp-15502	Be3Cd4Si3SO12	0.817199	7.19711	9.74089	0.635096	1.76879	1.86e+21	6.64001	10.6698	0.490929	1.45287	9.58e+20	6.92914	10.1907	0.560677
mp-644092	LiTiFeO4	2.0614	3.5976	4.81484	0.645871	1.33914	9.29e+20	3.12657	5.04111	0.488442	1.07269	3.61e+20	3.32622	4.55121	0.624791
mp-4825	Ho3Ga5O12	3.3261	7.20326	9.68223	0.641697	1.70425	1.64e+21	6.57472	10.6552	0.484699	1.59339	1.08e+21	6.8099	10.2862	0.538678
mp-574224	Mn3Cr2(SiO4)3	2.8889	2.26493	3.26351	0.578168	0.995205	3.38e+20	2.15269	3.48954	0.484529	0.93739	2.26e+20	2.20705	3.38081	0.527455
mp-571478	NaTl2RhF6	1.7809	13.3492	18.0928	0.633754	2.23538	3.63e+21	11.7797	19.1166	0.483709	2.20365	2.82e+21	12.1495	18.862	0.516963
mp-23453	In7Cl9	2.1903	2.30011	3.24972	0.595463	1.07125	4.69e+20	2.32334	3.77732	0.482384	0.90828	2.26e+20	2.30809	3.43291	0.551297
mp-558501	Rb2SbBr6	0	0.0805211	0.0844385	0.931224	0.853737	1.35e+22	3.26931	5.31542	0.482367	0.0496829	1.33e+22	3.25571	5.30923	0.480199
mp-15575	Cs2KYF6	6.464	12.7071	17.2998	0.629522	2.26975	3.96e+21	11.6329	18.9319	0.481661	1.84469	2.02e+21	12.1742	18.0904	0.552059
mp-19965	Y3Ga5O12	3.35291	7.22916	9.77131	0.63636	1.69278	1.64e+21	6.58134	10.732	0.480235	1.60438	1.1e+21	6.81252	10.3847	0.531339
mp-679958	Cs2TeCl6	2.7991	4.02557	4.14381	0.957506	2.71793	7.7e+21	15.1368	24.7081	0.479507	1.52007	4.39e+20	3.79089	4.22799	0.849008
mp-1990	K2TcCl6	1.14261	3.78209	3.11586	1.33731	3.065	1.3e+22	18.0415	29.4927	0.478453	1.70496	3.65e+20	3.64074	3.17402	1.22848
mp-16108	LiMnF3	3.40121	4.97332	7.07085	0.589878	1.37227	9.06e+20	4.41571	7.28804	0.471612	1.29602	6.08e+20	4.62615	7.20026	0.515
mp-680063	Sr4Al6SO16	4.3936	10.7045	16.1471	0.539766	2.013	3.11e+21	8.88058	14.7159	0.468794	1.55315	1.67e+21	9.80302	15.4232	0.506733
mp-567841	N2	7.34271	12.9618	18.1546	0.603275	2.20573	3.85e+21	11.4987	19.1039	0.46697	1.85108	2.18e+21	12.1626	18.6571	0.526351
mp-677179	K2NaAlF6	6.8578	10.3872	8.09118	1.45455	3.94721	5.26e+22	30.2146	50.3056	0.46548	2.55524	1.31e+21	10.0164	8.33555	1.31724
mp-556649	V2SnO7	2.60539	5.37721	7.54734	0.601374	1.45255	1.15e+21	4.91141	8.21052	0.462652	1.31787	7e+20	5.114	7.91701	0.519157
mp-579224	Ca(BS2)2	3.0095	3.05126	4.35596	0.586265	1.08704	4.72e+20	2.83668	4.74996	0.46151	1.03993	3.14e+20	2.92701	4.57648	0.511491
mp-560768	SiF4	7.7173	13.179	10.7042	1.36614	5.70425	7.38e+22	73.0628	122.716	0.459403	2.6501	7.06e+22	139.423	290.863	0.33187
mp-567910	Tm3Sb5O12	3.1094	5.29389	7.56096	0.585864	1.45579	1.19e+21	4.90763	8.24926	0.458865	1.25158	6.77e+20	5.09115	7.92054	0.515337
mp-4604	Ca4Mg4Fe3H22	1.4456	13.1292	18.5221	0.596792	2.34384	5.24e+21	12.5758	21.3011	0.453626	1.66467	2.01e+21	12.912	19.5536	0.5366
mp-27843	Mn15NiO32	1.11431	9.42031	14.1826	0.54133	1.82206	2.6e+21	8.246	14.0382	0.450192	1.47469	1.42e+21	8.82529	13.9927	0.500888
mp-15501	Yb4Mg4Fe3H22	1.4719	14.9003	21.443	0.57925	2.56574	7.48e+21	14.5505	24.788	0.449735	1.67646	2.26e+21	14.7878	22.4885	0.533228
mp-15576	Hg4Sb2I3	0.715197	3.28452	4.8226	0.562064	1.10752	5.35e+20	3.0127	5.14199	0.448475	1.04704	3.53e+20	3.12825	5.00578	0.49402
mp-15599	Li2CoGe3O8	2.4709	2.56107	3.84784	0.543008	1.00222	4.07e+20	2.42562	4.15043	0.446781	0.952584	2.72e+20	2.48698	4.01323	0.487828
mp-16107	Na3P6N11	3.8178	1.61165	2.52458	0.510059	0.813422	2.27e+20	1.55871	2.67559	0.44465	0.770499	1.5e+20	1.59185	2.58177	0.48415
mp-530571	Er3Sb5O12	3.11759	5.2225	7.60011	0.569624	1.42312	1.2e+21	4.83595	8.3091	0.444008	1.22518	6.33e+20	5.03625	7.93713	0.505435
mp-570652	Dy3Ga5O12	3.3047	7.1711	10.2391	0.586116	1.61207	1.66e+21	6.58261	11.3126	0.443866	1.50278	1.09e+21	6.80451	10.9108	0.492507
mp-632724	KRb2ScF6	6.3814	10.9241	15.5465	0.589022	1.98583	3.17e+21	9.87539	17.0092	0.442389	1.73637	1.76e+21	10.363	16.3118	0.506378
mp-558539	Dy3Sb5O12	3.1583	5.19045	7.61587	0.562636	1.41188	1.21e+21	4.80241	8.31124	0.439229	1.21214	6.39e+20	5.00096	7.94874	0.499037
mp-560328	SrNiO3	0	0.0108679	0.0109376	0.990464	1.33459	1.25e+23	11.4674	20.0087	0.433884	0.0300263	1.25e+23	11.4674	20.0087	0.433884
mp-531297	Ho3Sb5O12	3.1298	5.22364	7.73131	0.555366	1.39602	1.19e+21	4.83011	8.43461	0.43335	1.21195	6.78e+20	5.01482	8.09919	0.487215
mp-13771	SiO2	5.4398	43.612	140.329	0.173256	2.25545	5.1e+21	12.554	21.9782	0.431705	1.66489	3.95e+21	18.8378	36.1328	0.376436
mp-690785	Sm3Ga5O12	3.1576	6.85687	10.1745	0.553246	1.57337	1.71e+21	6.38554	11.2494	0.427663	1.39585	1.03e+21	6.60078	10.8008	0.477759
mp-643397	Mn(NO3)2	2.7416	3.46068	5.26188	0.533374	1.14462	6.95e+20	3.25347	5.74806	0.425831	1.02351	3.99e+20	3.36127	5.50329	0.477333
mp-6404	Cd4P2Cl3	1.3806	3.36382	5.1148	0.533343	1.14404	7.09e+20	3.295	5.86262	0.421353	0.984561	3.74e+20	3.33899	5.45985	0.478246
mp-723378	Tb3Ga5O12	3.27909	7.043	10.5166	0.548053	1.54865	1.68e+21	6.52805	11.6933	0.417126	1.42843	1.08e+21	6.73604	11.2418	0.463825
mp-721851	Nd3Ga5O12	3.0611	7.31243	11.1112	0.533891	1.58057	1.84e+21	6.65744	11.9463	0.416018	1.37668	1.07e+21	6.95751	11.5759	0.465958
mp-722330	B6H10N	5.6619	10.9329	16.3724	0.545671	1.93309	3.39e+21	9.96056	17.9115	0.414693	1.5507	1.62e+21	10.478	17.0578	0.481432
mp-697044	Li7VN4	3.0112	7.13223	10.6818	0.545595	1.51645	1.58e+21	6.42828	11.5698	0.414147	1.41523	1.04e+21	6.69015	11.2206	0.460395
mp-557112	K(BH)6	5.5321	13.0007	20.0717	0.521286	2.14632	4.94e+21	11.9311	21.5797	0.411104	1.53277	1.93e+21	12.5932	20.6471	0.47634
mp-2292	SiO2	5.5882	10.0099	15.2235	0.533182	1.8885	3.31e+21	9.52946	17.2938	0.409039	1.4731	1.58e+21	9.79754	16.1961	0.470499
mp-567486	Cd4Sb2I3	1.12969	3.04935	4.7761	0.510153	1.05121	5.83e+20	2.93674	5.34603	0.407146	0.93092	3.28e+20	3.00005	5.05055	0.457809
mp-643246	Li2Ni3SbO8	0.223705	1.49411	2.70891	0.409623	1.255	1.05e+21	4.07666	7.45425	0.404438	0.949882	8.02e+20	4.03981	7.12846	0.426626
mp-696275	Cs2LiIr(CN)6	5.40341	5.74818	4.09388	1.66377	3.46274	2.04e+22	33.6397	61.6286	0.403278	2.31426	1.96e+22	52.8674	109.771	0.334234
mp-530545	Ba(AlS2)2	3.65131	4.48235	7.03852	0.508203	1.20616	8.71e+20	4.08542	7.50354	0.40175	1.11985	5.59e+20	4.24831	7.31088	0.442966
mp-697038	K2NaCrF6	3.9909	6.66687	14.7441	0.304058	3.56185	2.27e+22	35.2208	64.734	0.401329	2.46562	2.11e+22	64.8625	141.497	0.310362
mp-42160	Lu3Sb5O12	3.10621	5.42449	8.39998	0.518945	1.35325	1.28e+21	5.03546	9.28003	0.3997	1.18167	7.24e+20	5.22314	8.86357	0.45236
mp-643579	Ca19(Mg4H27)2	2.7886	2.27972	1.67735	1.58448	2.32158	2.03e+22	13.4642	24.8861	0.397958	1.51419	1.79e+20	2.26267	1.71058	1.5213
mp-697030	Ni3S4	0	0.0115693	0.0156219	0.637328	0.691507	3.13e+22	3.96789	7.35219	0.396474	0.0224684	3.13e+22	3.96789	7.35219	0.396474
mp-643071	BaCa2(PN2)6	4.07261	4.35283	6.83801	0.507882	1.15634	7.68e+20	3.94737	7.31469	0.396431	1.17257	5.83e+20	4.06366	7.17663	0.426085
mp-644264	Sr4TiAs4	1.3505	3.06514	4.86379	0.50028	0.970733	4.57e+20	2.84143	5.2918	0.39346	1.02998	3.72e+20	2.89666	5.18485	0.417582
mp-643394	Cs2KBiF6	4.95459	4.52263	7.0529	0.513493	1.17632	8.28e+20	4.1083	7.66129	0.392682	1.20819	6.44e+20	4.21741	7.50208	0.421499
mp-24006	Ni(NO3)2	3.39599	4.11201	6.59658	0.492157	1.17022	8.64e+20	3.82947	7.14524	0.392358	1.05493	4.97e+20	3.9729	6.88067	0.438748
mp-15833	Dy3Al5O12	4.56851	4.50555	7.00661	0.515655	1.23808	1e+21	4.39168	8.20005	0.391942	1.1004	5.71e+20	4.44951	7.62733	0.445563
mp-694981	Be3Cd4Si3SeO12	2.8506	8.84404	13.7792	0.514212	1.65922	2.39e+21	8.16666	15.3212	0.389158	1.43084	1.33e+21	8.47677	14.5892	0.442893
mp-699485	Sr4TiP4	1.432	3.2882	5.24182	0.496837	0.992407	5.03e+20	3.03832	5.71749	0.387385	1.05779	4.12e+20	3.09629	5.6053	0.410547
mp-27779	Co(Bi3O5)4	1.1879	2.0675	3.36534	0.481531	0.882172	4.06e+20	2.15339	4.0729	0.384438	0.778958	2.06e+20	2.09856	3.61217	0.442823
mp-554791	Be3Zn4Si3SO12	3.96541	16.2005	28.131	0.437036	2.25883	6.7e+21	14.4429	27.3955	0.38279	1.59034	3.05e+21	15.5551	27.9457	0.415275
mp-558891	Er3Al5O12	4.75801	4.55882	7.19624	0.504221	1.22657	1.02e+21	4.46006	8.46543	0.382417	1.0854	5.76e+20	4.51054	7.84862	0.435665
mp-14026	Cs2NpBr6	0.0882057	0.614726	7.20236	0.0249351	2.52388	8.84e+21	19.392	36.9391	0.380369	2.00351	8.54e+21	30.6659	66.1468	0.315661
mp-14002	Tb3Al5O12	4.47299	4.55409	7.23433	0.499465	1.21785	1.02e+21	4.43773	8.46532	0.379556	1.08795	5.85e+20	4.49647	7.88391	0.43072
mp-643293	Sr2H6Ru	2.26161	19.2643	28.003	0.570587	4.61631	5.55e+22	64.9003	124.291	0.377319	3.02717	5.45e+22	133.856	317.006	0.274382
mp-35249	Be3Cd4Si3TeO12	2.87871	7.80888	12.494	0.494116	1.47457	1.77e+21	7.07888	13.6497	0.373477	1.40896	1.26e+21	7.30637	13.2819	0.408
mp-35785	MoF6	4.2539	12.7759	57.0892	0.105866	5.96971	1.3e+23	104.307	201.22	0.373219	2.36504	4.44e+22	69.4988	148.276	0.320892
mp-556528	Co4B6O13	2.8028	7.97572	13.0472	0.477947	1.48555	1.85e+21	6.99312	13.4921	0.373155	1.37948	1.24e+21	7.34225	13.3263	0.408957
mp-36866	Rb(BH)6	5.5367	15.786	26.8365	0.45115	2.35938	1.02e+22	14.9108	28.9124	0.370362	1.49648	2.69e+21	15.5225	27.5866	0.422079
mp-571184	Na8TiAs4	1.0362	2.35266	1.81458	1.4763	2.91537	2.77e+22	22.1657	43.0493	0.369464	1.4702	1.9e+20	2.34375	1.86238	1.41177
mp-555393	P4PtF12	4.93689	7.08339	11.4804	0.484648	1.39579	1.56e+21	6.35936	12.3695	0.368629	1.39656	1.11e+21	6.585	12.0867	0.402137
mp-33948	EuGeO3	0	0.196685	0.0216771	27.331	1.98984	9.89e+22	18.0562	35.1837	0.367644	0.096651	9.89e+22	18.0562	35.1837	0.367644
mp-29746	Li(NiO2)2	0.782504	5.3673	8.95814	0.463774	1.27271	1.27e+21	5.00403	9.78979	0.365443	1.12685	7.32e+20	5.17288	9.3998	0.408244
mp-17912	Ag7PSe6	0.441205	2.37965	4.03105	0.453567	0.846748	3.61e+20	2.31568	4.53316	0.365104	0.839413	2.59e+20	2.34682	4.3355	0.398255
mp-15503	Cs2NaScF6	6.7991	15.0682	15.8462	0.927274	4.14575	1.07e+23	46.7034	91.7074	0.363427	2.32881	2.39e+21	14.4436	16.3502	0.830291
mp-679928	HfVF6	3.2222	10.2207	16.9546	0.468046	1.65236	2.73e+21	8.97597	17.69	0.361435	1.57752	1.82e+21	9.41986	17.4227	0.397553
mp-15704	Sm3Sb5O12	3.137	4.40383	7.3351	0.465197	1.12757	9.02e+20	4.03855	7.97414	0.360423	1.04522	5.57e+20	4.19489	7.69116	0.402804
mp-557071	La3Al5O12	3.7948	2.38858	4.12731	0.44026	0.883886	4.59e+20	2.38355	4.71164	0.359815	0.795092	2.62e+20	2.389	4.38791	0.401734
mp-1273	Ca(BO2)2	6.0657	7.16787	11.9998	0.461665	1.37829	1.59e+21	6.42378	12.7393	0.358072	1.28442	1.06e+21	6.69479	12.4579	0.393947
mp-23274	Y3Sc2Al3O12	4.2713	5.13144	8.65229	0.456733	1.30128	1.47e+21	5.2934	10.5327	0.356283	1.09263	7.7e+20	5.26771	9.6361	0.404185
mp-30958	Eu2Pb2O7	0	0.0920977	0.237923	0.240834	3.27987	7.9e+22	31.8202	63.4427	0.355207	0.390759	7.72e+22	32.6297	66.8962	0.340657
mp-579304	Na6Mn2B4SO16	1.4536	3.56245	6.10672	0.445565	1.00519	6.69e+20	3.27743	6.55742	0.353347	0.946515	4.16e+20	3.40411	6.34874	0.392622
mp-677627	Ca3Ta4(O6F)2	3.88051	4.83384	8.00808	0.468971	2.13527	6.01e+22	17.379	34.8307	0.352446	1.06572	6.11e+20	4.68976	8.57001	0.404812
mp-30230	Zn2Ge3O8	2.3392	7.85008	12.9573	0.471565	1.46715	2.11e+21	7.32719	14.8388	0.346984	1.31188	1.16e+21	7.571	13.9313	0.400628
mp-566912	Hg6BiSb4Br7	1.0313	2.48157	4.37137	0.427724	0.810632	3.51e+20	2.31565	4.70752	0.345	0.828573	2.64e+20	2.3735	4.58699	0.372213
mp-18352	Li2Ti3NiO8	2.70659	3.8179	6.54366	0.445663	1.00423	6.91e+20	3.53536	7.23371	0.341672	0.984551	4.54e+20	3.64794	6.94533	0.380656
mp-15500	K3P6N11	3.9959	1.6982	3.15199	0.395462	0.690352	2.34e+20	1.64311	3.37955	0.339009	0.686687	1.68e+20	1.67111	3.26465	0.366228
mp-1045	Ag2Hg7(As2I3)2	0.632705	4.23675	7.36684	0.436141	1.04169	7.76e+20	3.91409	8.0596	0.338436	1.01131	5.36e+20	4.03213	7.80698	0.371174
mp-27626	Li7TaN4	3.341	7.0323	12.1147	0.442261	1.33467	1.64e+21	6.42104	13.2384	0.337798	1.24955	1.07e+21	6.65184	12.8015	0.37456
mp-27625	MoP2O7	1.67881	6.50599	11.7199	0.413603	1.39945	2.4e+21	6.06309	12.5147	0.337219	1.05037	8.36e+20	6.34612	12.0587	0.381778
mp-13944	Ca3Y2(GeO4)3	3.2592	4.20186	7.22791	0.443244	1.06477	8.57e+20	4.06499	8.4222	0.335313	1.00528	5.44e+20	4.12435	7.92275	0.375595
mp-27528	BaSr2(PN2)6	4.1542	3.75193	6.59452	0.429147	0.963168	6.23e+20	3.44729	7.15864	0.334172	1.01307	5e+20	3.52229	7.02063	0.355364
mp-27192	Cs3P6N11	4.0879	1.59049	3.01221	0.383678	0.659343	2.11e+20	1.53996	3.20594	0.332915	0.663428	1.55e+20	1.56615	3.10635	0.357992
mp-566314	Li3Cr2(AsO4)3	2.6702	2.55685	4.63834	0.409273	0.804135	3.78e+20	2.40064	5.03151	0.329566	0.81525	2.71e+20	2.46207	4.87355	0.359073
mp-554003	Mg3WO6	3.9283	2.61089	3.17481	0.745772	1.20126	1.25e+21	5.48242	11.507	0.328863	1.17588	8.91e+20	5.63533	11.1801	0.35786
mp-21989	K2SiF6	7.2224	11.8075	18.9742	0.490899	4.05609	4.87e+22	61.5874	129.338	0.328587	2.73019	4.56e+22	101.777	245.395	0.2671
mp-686969	Sm3Al5O12	4.1378	5.0937	8.94221	0.429915	1.13573	1.08e+21	4.81851	10.1393	0.327613	1.08391	7.22e+20	4.92733	9.70009	0.362038
mp-553921	Li4Be3P3ClO12	6.2181	10.5943	18.8389	0.42172	1.61061	3.16e+21	9.46965	19.9505	0.327016	1.42867	1.81e+21	9.99185	19.47	0.367637
mp-6067	Ag15P4S16Cl3	1.2258	3.1279	5.61233	0.416068	0.883164	5.09e+20	2.93972	6.19906	0.326566	0.870879	3.57e+20	3.01033	5.97517	0.357598
mp-13827	Cs(BH)6	5.38741	21.713	41.0044	0.38533	2.25087	9.13e+21	18.3944	39.1303	0.322298	1.78972	4.76e+21	20.1512	40.1617	0.355412
mp-531184	Ba(GaS2)2	2.8999	4.37246	7.95672	0.407369	1.03022	8.6e+20	4.04098	8.64914	0.319354	0.983237	5.77e+20	4.1664	8.38636	0.350171
mp-13875	Tb3Fe5O12	1.6178	4.23438	7.77076	0.402244	0.991019	7.63e+20	3.83571	8.24316	0.317415	0.970045	5.54e+20	3.96477	8.09045	0.343058
mp-24046	K2NaRhF6	2.0202	10.3	18.1216	0.42851	1.52784	2.78e+21	9.27211	19.951	0.316826	1.56605	2.15e+21	9.52006	19.498	0.341173
mp-41734	Li2Fe3SbO8	2.0753	6.048	11.1281	0.400672	1.26237	1.7e+21	5.83287	12.5586	0.316526	1.07144	9.06e+20	5.95447	11.8797	0.354862
mp-677250	Rb3P6N11	3.9206	1.68462	3.27825	0.368376	0.654495	2.29e+20	1.63057	3.51585	0.315838	0.659455	1.67e+20	1.65693	3.4009	0.340068
mp-23949	HfV2O7	2.65029	5.98314	8.25178	0.617409	1.6508	5.32e+22	13.644	29.4649	0.315104	1.39944	7.77e+20	5.61715	8.53842	0.533591
mp-723059	Nd3Sb5O12	3.15911	4.18205	7.71113	0.3994	0.98588	7.67e+20	3.8418	8.30964	0.314361	0.958953	5.54e+20	3.95054	8.11233	0.339833
mp-540000	Mg3Al2(SiO4)3	4.94029	7.16488	13.2018	0.399817	1.27574	1.67e+21	6.48357	14.0525	0.313393	1.17642	1.12e+21	6.72441	13.7371	0.342483
mp-734733	Hg6Sb5Br7	0.948698	2.99504	5.61945	0.389102	0.823955	4.54e+20	2.7418	5.96964	0.311265	0.824821	3.29e+20	2.8327	5.84381	0.337486
mp-532727	Ni3B7IO13	2.37	4.18412	7.62813	0.406237	0.972845	7.49e+20	3.87422	8.46139	0.309823	0.951444	5.33e+20	3.97562	8.16957	0.339476
mp-34322	Li7NbN4	3.3329	7.10847	13.0171	0.403544	1.27562	1.73e+21	6.55116	14.3338	0.308985	1.18619	1.11e+21	6.76921	13.8171	0.342913
mp-6856	K3Co(NO2)6	2.6913	9.53648	17.6613	0.396778	1.44822	2.53e+21	8.53427	18.7197	0.307822	1.27194	1.57e+21	8.93669	18.292	0.341485
mp-38418	ZrV2O7	2.59261	6.04863	9.15729	0.536829	1.55796	5.19e+22	12.9559	28.4728	0.306944	1.29255	7.8e+20	5.69498	9.50683	0.463644
mp-29513	Ca3Sc2(GeO4)3	3.4667	4.65908	8.52233	0.404215	1.06481	1.04e+21	4.51705	9.94446	0.306133	0.976766	6.23e+20	4.58132	9.30543	0.345448
mp-504669	Cs2KFeF6	4.0985	5.11682	9.42385	0.40009	1.04556	9.47e+20	4.59105	10.11	0.306012	1.10028	7.37e+20	4.72503	9.92995	0.328237
mp-740759	Er3Fe5O12	1.62881	4.32736	8.09662	0.390733	0.985414	8.24e+20	3.91723	8.63756	0.30541	0.957489	5.53e+20	4.07498	8.43146	0.335996
mp-18684	Y3Al5O12	4.4951	4.78082	8.73783	0.404713	1.07094	1.06e+21	4.64358	10.2477	0.305028	0.994908	6.55e+20	4.70539	9.60891	0.342675
mp-559730	Ca3Nb4(O6F)2	2.9914	4.61873	6.95271	0.541444	1.84811	5.89e+22	16.3763	36.1921	0.304371	1.14062	5.59e+20	4.46864	7.41923	0.46744
mp-740719	Na6Mg2C4SO16	3.7262	1.91298	3.81322	0.355326	0.675925	2.71e+20	1.83245	4.0509	0.304245	0.671204	1.98e+20	1.8684	3.94801	0.325565
mp-757233	NaCu3O4	0	0.103319	0.0188846	12.797	1.22385	3.11e+22	8.60176	19.0445	0.303547	0.100333	3.11e+22	8.60176	19.0445	0.303547
mp-757001	Lu3Fe5O12	1.6295	4.40802	8.30163	0.386919	0.991335	8.68e+20	3.99868	8.89447	0.301436	0.954932	5.84e+20	4.1546	8.67265	0.331563
mp-756935	ThP2O7	5.38989	6.94212	24.4347	0.151435	2.15622	5.32e+22	19.4196	43.4363	0.298939	0.646168	1.14e+21	6.59058	26.2552	0.125766
mp-755421	Al6Cd4SO12	2.7145	10.9224	20.5028	0.388826	1.57286	3.61e+21	10.0601	22.5497	0.297984	1.27634	1.75e+21	10.5064	21.4583	0.342601
mp-757450	Li3Nd3(WO6)2	3.6651	6.8339	12.6829	0.395527	1.20582	1.55e+21	6.29169	14.1265	0.297236	1.15611	1.04e+21	6.47938	13.5986	0.328894
mp-754646	Rb2NaCrF6	3.9484	7.14642	26.2952	0.141683	2.87107	2.16e+22	35.645	80.6113	0.294038	2.2444	2.03e+22	55.8341	141.228	0.248582
mp-753414	Ca3Ga2(SiO4)3	4.2497	7.06564	13.2991	0.387254	1.25753	1.86e+21	6.69562	15.1491	0.293838	1.14861	1.14e+21	6.85464	14.3939	0.328633
mp-755044	LiFe5O8	1.3182	5.50027	10.4269	0.383128	1.10398	1.29e+21	5.08581	11.5387	0.292622	1.00456	7.33e+20	5.27645	11.0096	0.331783
mp-755159	CsSn	1.1371	2.25688	4.53187	0.351436	0.679978	2.87e+20	2.06486	4.69189	0.291954	0.721355	2.32e+20	2.12175	4.64251	0.308967
mp-760375	Ge3(BiO3)4	3.4996	3.96337	7.5937	0.377065	0.940592	8.12e+20	3.78998	8.67394	0.288823	0.913174	5.34e+20	3.86518	8.2532	0.320494
mp-765476	H3N	4.32871	5.26403	10.1659	0.372616	1.13091	1.51e+21	5.23167	11.9908	0.288195	0.999728	8.52e+20	5.25908	11.1436	0.324211
mp-766267	Na3AsS3	2.5189	7.11577	13.9058	0.366047	1.21157	1.74e+21	6.39106	14.6846	0.287122	1.11168	1.09e+21	6.68668	14.3714	0.317372
mp-769211	K3PSe16	1.1056	3.05114	6.00781	0.361925	0.809253	5.21e+20	2.88596	6.65173	0.28578	0.791632	3.56e+20	2.95214	6.39892	0.313361
mp-769222	K2NaFeF6	4.0922	8.09828	16.0323	0.359001	1.32202	2.43e+21	7.27345	16.7689	0.285663	1.11203	1.24e+21	7.70757	16.444	0.320897
mp-769396	Er2V2O7	0	0.0845894	0.183158	0.313858	0.650897	4.94e+21	2.59317	5.99968	0.284154	0.102289	4.94e+21	2.59317	5.99968	0.284154
mp-755635	Na3AsSe3	2.02151	5.14351	10.0063	0.368535	1.05192	1.18e+21	4.87833	11.3186	0.282955	0.969329	7.25e+20	4.99045	10.762	0.315769
mp-772617	Hg3TeO6	1.16091	2.79359	5.55065	0.35705	0.759646	4.33e+20	2.63981	6.13267	0.282413	0.770391	3.19e+20	2.69288	5.92504	0.306401
mp-774752	Li2Ti3MnO8	2.3698	3.19243	6.30591	0.360215	0.80613	5.2e+20	2.96206	6.88302	0.282308	0.804782	3.73e+20	3.04242	6.67371	0.307807
mp-755239	Fe2O3	1.3902	4.89472	9.52255	0.368521	1.05463	1.25e+21	4.74194	11.0215	0.282212	0.943857	7.08e+20	4.81417	10.3139	0.318895
mp-775761	Sr3Al2(HO)12	3.88589	6.52565	12.7434	0.366443	1.17556	1.66e+21	6.14319	14.295	0.281717	1.08787	1.05e+21	6.3079	13.6996	0.312438
mp-755723	Cr2O3	1.7746	3.71087	7.31702	0.36117	0.86891	6.9e+20	3.38217	7.90755	0.279724	0.838424	4.59e+20	3.48756	7.60676	0.310444
mp-778152	La2Bi2O7	0	0.0816999	0.0573505	1.7003	0.484196	6.51e+21	2.11809	5.00615	0.275207	0.0494168	6.58e+21	2.11446	4.98211	0.27649
mp-778114	Cd4P2Br3	1.39809	4.2773	8.658	0.347239	0.990895	1.15e+21	4.24643	10.0857	0.273197	0.868653	6.06e+20	4.27711	9.40601	0.306633
mp-23287	Hg6BiAs4Cl7	1.2956	2.61916	5.38606	0.339107	0.717675	3.99e+20	2.46274	5.8751	0.271397	0.725842	2.9e+20	2.51932	5.69344	0.29435
mp-554560	Ca3Sc2(SiO4)3	4.10261	4.7923	9.62324	0.351426	1.02468	1.23e+21	4.83625	11.5919	0.269482	0.933612	7.34e+20	4.84962	10.7744	0.301974
mp-29104	Dy3Fe5O12	1.8667	4.17125	8.57191	0.339456	0.877534	7.26e+20	3.80759	9.12845	0.269388	0.87155	5.25e+20	3.92649	8.94542	0.290808
mp-17493	Li2Co3SbO8	0.736394	4.01954	8.09126	0.350139	0.900881	8.17e+20	3.84049	9.21072	0.26924	0.847221	4.93e+20	3.92712	8.70346	0.303091
mp-17167	Li2Ni3BiO8	0.328904	2.76749	4.65411	0.458537	1.50825	1.49e+22	9.95566	23.891	0.269001	1.16854	6.47e+20	4.3488	6.87615	0.502963
mp-16793	Rb2NaFeF6	4.07231	7.52802	15.5422	0.337096	1.21185	2.06e+21	6.83055	16.4316	0.268017	1.04852	1.11e+21	7.1729	16.0329	0.299243
mp-18981	Sn(SeO3)2	2.5848	8.03568	16.305	0.34598	1.19989	1.89e+21	7.19162	17.334	0.267234	1.15721	1.36e+21	7.44779	17.0257	0.289322
mp-31768	Ho3Fe5O12	1.8604	4.23419	8.69926	0.339572	0.885017	7.72e+20	3.84797	9.28917	0.266614	0.875973	5.6e+20	3.97228	9.09848	0.288474
mp-715434	CeP2O7	1.58621	7.29428	21.8202	0.193279	1.81295	5.6e+22	17.5946	42.6945	0.264552	0.752503	1.17e+21	6.9276	23.1728	0.163458
mp-715469	Gd2O3	2.88579	3.47918	7.21836	0.334625	0.840613	7.19e+20	3.35835	8.18914	0.262622	0.780828	4.43e+20	3.41192	7.75563	0.291791
mp-761295	SiO2	5.4289	4.16621	10.2405	0.259494	1.15194	5.76e+21	5.79833	14.1627	0.261961	0.690853	5.42e+20	4.17274	11.059	0.231769
mp-761409	Rb3AsSe16	0.910602	3.1185	6.55278	0.328306	0.765052	5.3e+20	2.93497	7.2036	0.260064	0.767746	3.84e+20	3	6.9842	0.281519
mp-761957	Li2NbCo3O8	0.739701	3.64455	7.67858	0.326997	0.813679	6.32e+20	3.41362	8.40336	0.258907	0.79508	4.54e+20	3.49055	8.14974	0.280301
mp-761980	AgSbF6	1.7672	8.7177	17.8286	0.341923	1.21095	2.05e+21	7.87999	19.452	0.257834	1.2431	1.59e+21	8.08341	19.0468	0.276477
mp-762054	Cs3SbO3	3.1046	4.48386	9.29327	0.33514	0.872144	7.74e+20	4.09295	10.1314	0.256772	0.961269	6.8e+20	4.14993	10.0095	0.266956
mp-762045	Cs2ReCl6	1.24781	3.85908	8.11452	0.327969	0.811619	6.29e+20	3.52907	8.74659	0.25629	0.860135	5.32e+20	3.59074	8.62378	0.268677
mp-761307	PdO2	0	0.0108628	0.00525878	2.96881	0.0651727	2.06e+22	0.432265	1.07169	0.256166	0.000489261	2.04e+22	0.429794	1.06348	0.256921
mp-763149	Tl2Ge2O7	0	0.133281	0.261096	0.364714	1.11408	5.76e+22	10.7306	26.8196	0.253081	0.202171	5.09e+21	3.76813	9.08584	0.26708
mp-765299	Hg4As2I3	0.658896	3.67962	7.76342	0.326306	0.804216	6.4e+20	3.42773	8.56834	0.253026	0.805867	4.61e+20	3.513	8.29466	0.275625
mp-766780	La3Ga5O12	2.86901	4.10322	8.74112	0.321615	0.929981	1.12e+21	4.18226	10.4904	0.251726	0.813904	5.8e+20	4.15203	9.59264	0.284762
mp-765966	Fe2SiO4	2.7102	7.54421	51.3967	0.0562365	1.67503	1.58e+22	12.5514	31.4955	0.251575	0.506275	1.47e+22	15.1276	46.8149	0.183687
mp-768110	Hg4As2Br3	0.723796	3.46867	7.48235	0.315637	0.754383	5.38e+20	3.14606	7.94915	0.248984	0.788234	4.23e+20	3.23259	7.81995	0.265779
mp-769597	Cs2KAgF6	0.573698	4.51707	10.083	0.299847	0.87775	8.42e+20	4.31132	10.8996	0.24877	0.942902	7.12e+20	4.3947	10.7658	0.260811
mp-771112	Ba(PN2)2	3.9118	4.14409	8.83271	0.321368	0.826897	7.12e+20	3.80377	9.63192	0.248171	0.849255	5.42e+20	3.90063	9.40046	0.267287
mp-771293	Ta2Pb2O7	1.6249	5.94697	12.419	0.331371	0.975311	1.19e+21	5.35828	13.663	0.245594	1.028	9.21e+20	5.50855	13.3374	0.26543
mp-771798	Ba3Fe2Br2O5	2.39989	2.66297	5.89622	0.303521	0.670294	4.06e+20	2.47736	6.3602	0.243096	0.706568	3.17e+20	2.5325	6.21941	0.259836
mp-773455	TiTe3O8	2.7279	6.49689	13.9226	0.318769	1.02554	1.47e+21	5.92822	15.3161	0.240804	0.999691	9.7e+20	6.13647	14.785	0.267392
mp-773503	Pb(NO3)2	3.59949	9.48412	22.5095	0.273494	2.1996	3.3e+22	22.5806	58.4084	0.240375	1.03526	1.65e+21	9.07829	24.0251	0.232278
mp-774010	BHO2	7.0739	7.63063	16.4413	0.316181	1.08188	1.75e+21	6.80614	17.7179	0.238086	1.1069	1.25e+21	7.06126	17.3089	0.260567
mp-774941	Mn2Hg2O7	0	0.0382692	0.0572845	0.546034	0.732385	2.1e+22	5.24215	13.6504	0.237983	0.0625385	2.1e+22	5.24215	13.6504	0.237983
mp-774361	SiO2	5.5665	4.04072	8.85313	0.308349	0.790898	6.77e+20	3.68523	9.59762	0.237931	0.828148	5.33e+20	3.77514	9.40198	0.254432
mp-775060	Li2NbFe3O8	1.61589	3.38934	7.63256	0.295915	0.73552	5.66e+20	3.1899	8.3811	0.234809	0.738449	4.41e+20	3.24207	8.16959	0.249996
mp-775164	K2MnF6	3.27539	12.781	16.4783	0.683088	2.54447	6.96e+22	32.188	84.5926	0.234716	2.00701	2.21e+21	12.2531	17.4672	0.587534
mp-775161	Na3Ga3(TeO6)2	1.8467	6.04101	13.2851	0.306632	0.98538	1.4e+21	5.63803	14.8659	0.233564	0.936984	9.14e+20	5.79206	14.2676	0.258657
mp-775326	Cs2Ba2(CO3)3	4.33809	6.75256	15.1031	0.298954	1.02114	1.54e+21	6.16931	16.2782	0.233317	0.995909	1.11e+21	6.34547	15.9217	0.2516
mp-775327	La2O3	3.532	4.12482	9.03576	0.308432	0.942786	1.42e+21	4.64545	12.2658	0.233075	0.786615	6.11e+20	4.36338	10.3671	0.273053
mp-775392	Li2MgTi3O8	3.2915	6.87291	15.0191	0.309561	1.04056	1.72e+21	6.38491	17.025	0.229668	0.968405	1.04e+21	6.58566	16.1589	0.260185
mp-775393	Na3Cr2(AsO4)3	2.6075	2.65931	6.08108	0.289189	0.644124	4.01e+20	2.50334	6.68248	0.229283	0.671346	3.11e+20	2.55028	6.49572	0.246004
mp-775865	Ca3Al2(HO)12	4.1187	3.51784	7.93864	0.294982	0.74178	6.17e+20	3.31899	8.8719	0.228815	0.750582	4.5e+20	3.38365	8.56203	0.248435
mp-776115	HfP2O7	5.292	7.12151	15.057	0.325274	1.17718	5.57e+22	12.1174	32.465	0.228029	1.01495	1.04e+21	6.73907	15.9269	0.275233
mp-776873	Ba3Fe2Cl2O5	2.438	2.83474	6.61177	0.280734	0.649467	4.11e+20	2.648	7.11441	0.227075	0.69206	3.48e+20	2.6869	7.00792	0.237406
mp-776741	Ag7AsS6	0.501002	4.01595	9.2137	0.287761	0.780074	7.22e+20	3.79337	10.2117	0.226409	0.797818	5.44e+20	3.88127	9.92285	0.244628
mp-776814	Li3Nd3(TeO6)2	3.1317	4.17865	9.51531	0.291018	0.821515	8.77e+20	4.02411	10.8364	0.226295	0.808049	6.16e+20	4.08173	10.3872	0.246331
mp-776833	SiO2	5.48801	31.0827	123.852	0.125726	1.4159	4.85e+21	11.2656	30.3647	0.225983	1.16076	3.79e+21	14.6388	41.689	0.208078
mp-777551	Sr3Y2(GeO4)3	3.13589	4.88187	10.8917	0.300078	0.849313	9.42e+20	4.58459	12.4102	0.224535	0.864418	6.97e+20	4.67194	11.9543	0.244319
mp-779404	K2NaMoF6	3.8964	6.14693	13.8711	0.294999	0.933995	1.26e+21	5.57443	15.1149	0.223971	0.994487	1.06e+21	5.67341	14.8923	0.235139
mp-781609	Gd3Sb5O12	2.7177	4.25104	9.92785	0.280195	0.817451	9.26e+20	4.03966	11.0577	0.22081	0.768291	5.74e+20	4.12821	10.573	0.243976
mp-556424	K3BiTe3	1.50131	3.7034	8.48584	0.288309	0.736605	6.42e+20	3.48156	9.53275	0.220716	0.764197	4.9e+20	3.54319	9.22892	0.237884
mp-557257	Cd4As2I3	1.17261	5.64941	13.6625	0.265894	0.921414	1.36e+21	5.06854	13.905	0.220073	0.865164	9.09e+20	5.30079	13.8835	0.23592
mp-19282	Rb2NaRhF6	1.9531	10.8973	24.762	0.291944	1.20325	2.75e+21	9.82406	27.0029	0.219442	1.30023	2.31e+21	10.006	26.6126	0.230548
mp-31624	Cs2NaFeF6	4.05261	6.8461	15.9211	0.281971	1.0116	1.8e+21	6.2208	17.1348	0.218752	0.922911	1.05e+21	6.50088	16.6066	0.244928
mp-18977	K3SbTe3	1.7117	3.92403	9.13844	0.281378	0.748984	7e+20	3.64408	10.0794	0.217384	0.768367	5.26e+20	3.72546	9.79521	0.234558
mp-18986	Ca3Zn3(TeO6)2	2.1296	6.73451	15.6828	0.281399	1.0155	1.97e+21	6.65884	18.849	0.209974	0.909368	1.09e+21	6.70174	17.3966	0.239102
mp-744192	Al6Cd4TeO12	2.5678	7.43252	18.8349	0.247891	1.29929	2.79e+22	11.8653	33.7749	0.208222	0.964767	1.35e+21	6.76635	20.0831	0.195563
mp-504723	KGa(Te3O7)2	2.9729	6.61761	15.9393	0.267514	0.921738	1.47e+21	6.01406	17.3288	0.204456	0.90838	1.04e+21	6.20531	16.8695	0.223097
mp-558852	Sr(BO2)2	6.3781	5.12213	12.0414	0.277436	0.826701	1.06e+21	4.93493	14.2585	0.203616	0.850864	8.22e+20	5.05069	13.9314	0.218289
mp-18848	Li2Ti3VO8	0.553194	4.78584	12.2659	0.243718	0.792346	9.44e+20	4.46433	12.9024	0.203529	0.798926	6.86e+20	4.63606	12.7107	0.220278
mp-640879	Mg(NO3)2	3.72439	15.9675	44.211	0.217049	1.54018	1.79e+22	14.0665	40.7661	0.202688	1.03844	2.96e+21	15.3309	45.0439	0.198562
mp-556417	Ca3Fe2(SiO4)3	2.61339	4.44364	11.0344	0.255556	0.768114	9.19e+20	4.15681	12.1632	0.199787	0.749761	6.14e+20	4.26561	11.7421	0.218954
mp-553896	Ca3Fe2(GeO4)3	2.3844	3.09782	7.7267	0.253859	0.661185	6.08e+20	3.02179	8.87118	0.198803	0.65038	4.04e+20	3.05669	8.41926	0.218759
mp-561067	Na6V2B4SO16	0	0.149716	0.269019	0.415171	1.43241	6.47e+21	13.7871	40.5312	0.198392	1.16715	6.1e+21	21.577	72.7587	0.161495
mp-554201	Cs2PtCl6	2.128	7.5028	10.2934	0.622292	1.77089	4.36e+22	20.5704	60.5662	0.197933	1.47375	9.77e+20	7.15393	10.7696	0.541402
mp-557397	Rb3SbO3	3.161	6.50076	15.9286	0.260724	0.872118	1.31e+21	5.77079	17.0052	0.197689	0.952351	1.11e+21	5.89682	16.8136	0.207701
mp-25173	MnCo3O8	0.938602	3.23585	8.18543	0.248554	0.691852	7.49e+20	3.2181	9.50315	0.19706	0.638888	4.29e+20	3.22343	8.83108	0.220525
mp-19239	Nb2Pb2O7	0.939595	5.76704	10.5284	0.405401	1.15223	1.92e+22	9.77683	28.9895	0.195855	1.14919	8.65e+20	5.36245	11.2899	0.327348
mp-19403	H2	7.37501	5.23999	13.4143	0.244142	0.853013	1.38e+21	5.06812	15.0483	0.195452	0.810144	9.31e+20	5.15058	14.4938	0.211842
mp-558046	Li2Mn3NiO8	1.322	5.20992	13.2285	0.247163	0.804196	1.14e+21	4.84432	14.5795	0.19153	0.797346	8.27e+20	4.9546	14.1593	0.206989
mp-19259	Pr3Sb5O12	3.1727	4.04438	8.06893	0.354858	0.917975	1.81e+22	7.56897	23.0104	0.188656	0.893689	5.16e+20	3.82026	8.47886	0.302436
mp-605034	Ca4Al6SO16	4.6703	9.03512	22.491	0.254616	1.0356	2.5e+21	8.28991	25.2361	0.188275	0.946986	1.52e+21	8.58598	24.0579	0.213206
mp-558111	N2	2.9915	11.3743	28.8444	0.247624	1.18075	3.77e+21	10.6427	32.4313	0.187989	1.03706	2.13e+21	10.9592	30.8075	0.212169
mp-19343	Al13Si5H18ClO38	4.26981	4.33306	11.1753	0.241436	0.687342	7.37e+20	3.86858	11.9125	0.185064	0.741356	5.74e+20	3.98981	11.7105	0.198868
mp-556320	SF6	5.77549	14.8222	50.7719	0.157737	3.03249	6.38e+22	74.7887	230.444	0.184886	2.21067	5.96e+22	124.57	437.345	0.152015
mp-556487	Na3BiO3	2.83611	8.31662	21.7637	0.236222	0.97152	2.16e+21	7.42933	22.9035	0.184744	0.940182	1.47e+21	7.73967	22.5337	0.201296
mp-19085	Ca3Cr2(SiO4)3	3.2229	2.79561	7.33627	0.235235	0.573515	4.41e+20	2.61977	8.07855	0.184669	0.599827	3.43e+20	2.67064	7.85659	0.198185
mp-19704	Cs2GeF6	6.0358	10.58	118.829	0.0265671	3.24878	1.16e+23	72.5254	226.181	0.181573	1.49056	3.4e+22	59.0736	259.528	0.108596
mp-558836	Sr2LiCBr3N2	3.9744	4.62892	13.6599	0.197263	2.06104	2.2e+22	33.7781	105.724	0.18059	1.50755	2.14e+22	43.2241	144.398	0.163776
mp-18992	Cs2KCuF6	0.907296	5.29025	13.9009	0.234773	0.736719	9.34e+20	4.75807	14.8989	0.180474	0.824528	8.58e+20	4.80816	14.8021	0.185132
mp-557686	ZrP2O7	4.4697	6.32672	20.4009	0.172701	1.19628	2.54e+22	11.8464	37.2937	0.179031	0.675431	9.72e+20	5.95612	21.9196	0.141643
mp-25013	KRb2GaF6	5.8895	11.1881	17.0937	0.529513	2.06738	4.34e+22	29.5626	93.4854	0.177827	1.766	2.11e+21	10.4457	18.0502	0.440235
mp-19400	Ca3In2(SiO4)3	3.668	9.8988	26.5636	0.22748	1.00543	2.65e+21	8.87531	28.5225	0.173577	0.982763	1.85e+21	9.19852	27.8636	0.18968
mp-19631	ZnSO4	4.2626	14.2684	38.2674	0.227677	1.22028	4.91e+21	12.8997	41.6632	0.172282	1.17137	3.28e+21	13.3744	40.4856	0.189873
mp-32316	NaPF6	7.0089	12.3481	16.2055	0.665129	2.65338	5.46e+22	60.8627	199.577	0.168408	2.05491	2.31e+21	11.6223	17.1161	0.559542
mp-24950	KBi6ClO9	2.3531	2.42461	6.78185	0.213767	0.54286	4.9e+20	2.48603	8.17471	0.167706	0.534422	3.11e+20	2.45856	7.54434	0.186032
mp-557938	K3BiSe3	2.06749	4.73832	13.0188	0.219574	0.688477	9.17e+20	4.41195	14.5525	0.166933	0.718533	7.09e+20	4.49472	14.1471	0.179082
mp-558674	ZrTe3O8	3.6731	8.34517	23.1738	0.216101	0.884897	1.98e+21	7.57871	25.2378	0.164556	0.881232	1.41e+21	7.80815	24.5876	0.178957
mp-19314	NaZn(PO3)3	4.8271	5.5049	15.3551	0.214657	0.721514	1.09e+21	4.98752	16.6382	0.164123	0.755331	8.53e+20	5.11211	16.3162	0.175377
mp-559931	Sc2Cd3(GeO4)3	2.3032	6.59054	18.4381	0.2137	0.830694	1.8e+21	6.26538	21.0529	0.162351	0.774529	1.08e+21	6.39358	19.949	0.18144
mp-24871	Ba2BN2Cl	2.7508	5.69437	16.6249	0.20046	0.740901	1.26e+21	5.0821	17.0974	0.162058	0.747403	9.47e+20	5.26075	16.9863	0.172354
mp-19553	K3SbSe3	2.2951	5.37244	15.259	0.208913	0.701256	1.02e+21	4.80256	16.1609	0.161998	0.753548	8.54e+20	4.9113	15.9889	0.170242
mp-19533	Sr4Al6SO12	3.3444	6.80108	209.931	0.0058311	1.75289	1.69e+22	28.3886	95.6424	0.161711	1.43233	1.59e+22	43.4568	163.755	0.136708
mp-19561	As2O3	4.0085	10.4682	29.2664	0.213922	0.996187	3e+21	9.57977	32.3256	0.161329	0.959205	1.98e+21	9.89732	31.2301	0.178409
mp-19535	Na4MgC6(SN)6	4.1656	6.47882	18.5098	0.207082	0.768175	1.39e+21	5.83003	19.7788	0.160032	0.779413	1.09e+21	5.96969	19.3975	0.17073
mp-19599	Na3Sc2V3O12	3.2084	4.51762	12.7985	0.209713	0.674707	9.93e+20	4.41094	15.1004	0.157875	0.673093	6.9e+20	4.44858	14.3208	0.173133
[truncated: 249 more rows]
